# Supplementary material
Source: PubMed Central journal article supplement (PMC7725914)
Supplement: NIHMS1623644-supplement-1.pdf [file NIHMS1623644-supplement-1.pdf]

|           | <b>Avg Log FC</b> | <b>% Healthy</b> | <b>% Infamed</b> | <b>F Value</b> |
|-----------|-------------------|------------------|------------------|----------------|
| Cd74      | -3.91             | 0.028            | 0.985            | 0              |
| H2-Ab1    | -2.89             | 0.013            | 0.911            | 3.24E-296      |
| Cym       | -2.85             | 0.047            | 0.459            | 5.82E-85       |
| Xist      | -2.78             | 0                | 0.453            | 1.26E-100      |
| H2-Aa     | -2.68             | 0.011            | 0.876            | 2.37E-276      |
| Pigr      | -2.66             | 0.073            | 0.887            | 4.42E-275      |
| H2-K1     | -2.64             | 0.555            | 0.97             | 0              |
| H2-Eb1    | -2.54             | 0.008            | 0.867            | 1.15E-270      |
| Sprr2a3   | -2.50             | 0.124            | 0.644            | 1.03E-126      |
| AW112010  | -2.41             | 0.017            | 0.691            | 8.62E-184      |
| H2-D1     | -2.31             | 0.718            | 0.976            | 0              |
| B2m       | -2.16             | 0.867            | 0.975            | 5.15E-297      |
| Bpifb1    | -2.14             | 0.277            | 0.715            | 2.85E-113      |
| Ly6a      | -2.12             | 0.004            | 0.501            | 3.74E-114      |
| Dmbt1     | -1.92             | 0.043            | 0.471            | 1.31E-91       |
| 2210407C1 | -1.80             | 0.214            | 0.588            | 1.64E-82       |
| Ubd       | -1.77             | 0.001            | 0.425            | 7.57E-92       |
| Psmb8     | -1.73             | 0.077            | 0.696            | 2.29E-173      |
| Ifitm3    | -1.53             | 0.079            | 0.562            | 7.60E-112      |
| Muc6      | -0.546547645      | 0.731            | 0.797            | 0.000282       |

| Gene      | Avg Log FC | % Healthy | % Inflamed | P Value   |
|-----------|------------|-----------|------------|-----------|
| Cd74      | -3.44      | 0.013     | 0.874      | 0         |
| Sprr2a3   | -3.17      | 0.068     | 0.734      | 0         |
| Cym       | -3.07      | 0.091     | 0.781      | 0         |
| H2-K1     | -2.75      | 0.441     | 0.669      | 3.81E-155 |
| Muc6      | -2.75      | 0.023     | 0.62       | 5.05E-256 |
| Tmsb10    | -2.71      | 0.484     | 0.784      | 1.27E-245 |
| Rpl39     | -2.69      | 0.867     | 0.914      | 0         |
| Rps26     | -2.67      | 0.882     | 0.914      | 0         |
| mt-Co1    | -2.60      | 0.986     | 0.999      | 0         |
| mt-Co3    | -2.55      | 0.971     | 0.999      | 0         |
| H2-D1     | -2.55      | 0.52      | 0.637      | 1.30E-111 |
| B2m       | -2.55      | 0.826     | 0.765      | 1.02E-171 |
| H2-Aa     | -2.53      | 0.004     | 0.525      | 2.30E-212 |
| Rps27     | -2.48      | 0.864     | 0.868      | 2.86E-284 |
| Rps28     | -2.41      | 0.856     | 0.861      | 1.12E-274 |
| AY036118  | -2.41      | 0.831     | 0.919      | 0         |
| Rps29     | -2.39      | 0.88      | 0.899      | 0         |
| Rpl37a    | -2.39      | 0.904     | 0.887      | 0         |
| H2-Ab1    | -2.37      | 0.006     | 0.466      | 8.67E-179 |
| 2210407C1 | -2.37      | 0.199     | 0.665      | 4.09E-211 |
| Rps21     | -2.34      | 0.839     | 0.761      | 2.74E-162 |
| Rps12     | -2.29      | 0.845     | 0.76       | 7.87E-155 |
| Ly6a      | -2.26      | 0.007     | 0.398      | 2.06E-143 |
| S100a6    | -2.24      | 0.072     | 0.458      | 1.12E-135 |
| Rps8      | -2.21      | 0.884     | 0.783      | 8.25E-175 |
| Rpl38     | -2.16      | 0.883     | 0.809      | 2.53E-199 |
| Rps15a    | -2.15      | 0.881     | 0.811      | 5.05E-202 |
| Rpl37     | -2.14      | 0.911     | 0.845      | 1.75E-243 |
| Agr2      | -2.09      | 0.357     | 0.529      | 1.11E-74  |
| H2-Eb1    | -2.09      | 0.005     | 0.365      | 8.66E-130 |
| Tff1      | -2.08      | 0.828     | 0.963      | 0         |
| Pigr      | -2.07      | 0.004     | 0.352      | 3.46E-124 |
| Rpl36     | -2.02      | 0.895     | 0.811      | 3.32E-197 |
| AW112010  | -2.00      | 0.007     | 0.321      | 9.46E-108 |
| Rplp1     | -1.99      | 0.911     | 0.824      | 5.98E-211 |
| mt-Nd4    | -1.99      | 0.935     | 0.901      | 0         |
| Bpifb1    | -1.98      | 0.255     | 0.514      | 1.83E-93  |
| S100a11   | -1.98      | 0.14      | 0.402      | 1.41E-78  |
| Rpl28     | -1.96      | 0.883     | 0.696      | 5.15E-86  |
| Dbi       | -1.95      | 0.828     | 0.642      | 5.21E-53  |
| Rplp2     | -1.92      | 0.88      | 0.698      | 2.00E-87  |
| mt-Cytb   | -1.91      | 0.981     | 0.997      | 0         |
| Rpl22     | -1.91      | 0.833     | 0.569      | 1.09E-17  |
| Rpl34     | -1.90      | 0.881     | 0.682      | 2.32E-75  |
| Atpif1    | -1.90      | 0.618     | 0.514      | 2.20E-20  |
| Rpl35a    | -1.89      | 0.8       | 0.579      | 3.76E-25  |
| Rpl27a    | -1.86      | 0.898     | 0.701      | 8.34E-88  |
| Rps16     | -1.85      | 0.916     | 0.78       | 2.03E-154 |
| Krt8      | -1.83      | 0.806     | 0.535      | 2.97E-08  |

|         |       |       |       |           |
|---------|-------|-------|-------|-----------|
| mt-Nd6  | -1.82 | 0.183 | 0.295 | 8.88E-23  |
| Rpl23   | -1.82 | 0.925 | 0.802 | 5.91E-175 |
| mt-Nd5  | -1.82 | 0.871 | 0.648 | 8.90E-52  |
| mt-Nd1  | -1.82 | 0.94  | 0.92  | 0         |
| Fxyd3   | -1.80 | 0.895 | 0.733 | 7.81E-107 |
| Rpl26   | -1.80 | 0.867 | 0.604 | 5.42E-29  |
| Rps20   | -1.79 | 0.909 | 0.817 | 1.72E-201 |
| Gm10076 | -1.79 | 0.926 | 0.962 | 0         |
| Rpl30   | -1.77 | 0.887 | 0.73  | 5.23E-114 |
| Clu     | -1.74 | 0.841 | 0.666 | 1.82E-62  |
| Rpl35   | -1.73 | 0.928 | 0.846 | 3.96E-229 |
| Fau     | -1.72 | 0.933 | 0.847 | 2.85E-228 |
| Tff2    | -1.71 | 0.404 | 0.73  | 2.09E-171 |
| Gm42418 | -1.71 | 0.931 | 0.997 | 0         |
| Rps24   | -1.71 | 0.948 | 0.863 | 9.70E-247 |
| mt-Atp6 | -1.71 | 0.967 | 0.973 | 0         |
| Rps18   | -1.70 | 0.882 | 0.662 | 4.61E-57  |
| Muc5ac  | -1.70 | 0.05  | 0.264 | 6.96E-58  |
| Rpl41   | -1.69 | 0.959 | 0.918 | 0         |
| Crip1   | -1.68 | 0.433 | 0.551 | 5.46E-62  |
| Tmsb4x  | -1.68 | 0.975 | 0.977 | 0         |
| Krt19   | -1.68 | 0.127 | 0.361 | 3.69E-63  |
| Rps19   | -1.68 | 0.895 | 0.715 | 4.64E-95  |
| Cox7c   | -1.68 | 0.868 | 0.579 | 3.10E-16  |
| Rpl36a  | -1.67 | 0.841 | 0.513 | 0.269328  |
| Dmbt1   | -1.66 | 0.004 | 0.225 | 1.26E-70  |
| Rps10   | -1.66 | 0.896 | 0.708 | 8.36E-91  |
| Rps13   | -1.66 | 0.862 | 0.531 | 0.001155  |
| Rpl27   | -1.64 | 0.869 | 0.561 | 9.79E-11  |
| Uqcr11  | -1.64 | 0.856 | 0.526 | 0.014571  |
| Atp4a   | -1.64 | 0.106 | 0.388 | 5.69E-81  |
| Rps27a  | -1.64 | 0.917 | 0.776 | 2.82E-149 |
| Hspa1b  | -1.62 | 0.243 | 0.253 | 0.113152  |
| Rpl18   | -1.60 | 0.895 | 0.699 | 5.84E-83  |
| Rack1   | -1.60 | 0.728 | 0.366 | 0.001388  |
| Uba52   | -1.59 | 0.951 | 0.891 | 4.14E-278 |
| Cox8a   | -1.59 | 0.918 | 0.785 | 8.02E-148 |
| mt-Nd2  | -1.59 | 0.903 | 0.748 | 3.66E-116 |
| Prdx1   | -1.58 | 0.725 | 0.544 | 3.24E-15  |
| Igkc    | -1.58 | 0     | 0.148 | 2.01E-45  |
| Rps9    | -1.58 | 0.911 | 0.732 | 1.84E-103 |
| Mgst3   | -1.57 | 0.5   | 0.47  | 1.29E-17  |
| Rps11   | -1.57 | 0.915 | 0.71  | 4.02E-83  |
| Cldn18  | -1.55 | 0.664 | 0.33  | 2.84E-06  |
| Spink4  | -1.55 | 0.029 | 0.2   | 2.82E-45  |
| Npm1    | -1.54 | 0.733 | 0.36  | 8.07E-06  |
| Ywhaz   | -1.53 | 0.562 | 0.293 | 2.74E-05  |
| Tpt1    | -1.53 | 0.929 | 0.794 | 2.52E-162 |
| Rps5    | -1.53 | 0.917 | 0.733 | 7.94E-101 |
| Rpl32   | -1.52 | 0.934 | 0.774 | 1.67E-136 |

|       |       |       |       |           |
|-------|-------|-------|-------|-----------|
| Rps23 | -1.52 | 0.885 | 0.59  | 1.44E-18  |
| Ptma  | -1.52 | 0.939 | 0.77  | 4.66E-127 |
| Rpl12 | -1.51 | 0.794 | 0.392 | 0.003314  |

Journal Pre-proof

|        | avg_logFC | % Infl Neck | % SP <sub>EiM</sub> | P Value   |
|--------|-----------|-------------|---------------------|-----------|
| Gkn3   | -3.46     | 0.198       | 0.863               | 1.46E-154 |
| Tff2   | -3.21     | 0.615       | 0.889               | 7.23E-77  |
| Spink4 | -2.25     | 0.355       | 0.664               | 9.31E-34  |
| Wfdc18 | -2.06     | 0.04        | 0.491               | 7.83E-122 |
| Muc6   | -2.03     | 0.797       | 0.993               | 3.23E-101 |
| Klk1   | -1.70     | 0.058       | 0.55                | 8.98E-124 |
| Aqp5   | -1.66     | 0.09        | 0.668               | 3.10E-139 |
| Agr2   | -1.55     | 0.841       | 0.985               | 3.49E-71  |
| Spp1   | -1.53     | 0.04        | 0.129               | 7.60E-06  |
| Cgref1 | -1.50     | 0.155       | 0.616               | 6.92E-78  |
| Xist   | 0.29      | 0.453       | 0.406               | 1         |
| Cftr   | -0.84     | 0.019       | 0.251               | 5.53E-58  |
| Wfdc2  | -0.61     | 0.595       | 0.734               | 1.57E-07  |

Journal Pre-proof

|         | <b>Avg Log FC</b> | <b>% Infl Chief</b> | <b>% SPEM</b> | <b>P Value</b> |
|---------|-------------------|---------------------|---------------|----------------|
| Gkn3    | -3.59             | 0.18                | 0.863         | 5.77E-161      |
| Xist    | -2.46             | 0.002               | 0.406         | 8.63E-183      |
| Muc6    | -2.37             | 0.62                | 0.993         | 6.30E-117      |
| Spink4  | -2.31             | 0.2                 | 0.664         | 5.19E-57       |
| Tff2    | -2.17             | 0.73                | 0.889         | 8.95E-35       |
| Agr2    | -2.13             | 0.529               | 0.985         | 6.82E-106      |
| Wfdc18  | -2.05             | 0.013               | 0.491         | 7.26E-184      |
| Spp1    | -1.80             | 0.017               | 0.129         | 1.61E-20       |
| Aqp5    | -1.79             | 0.009               | 0.668         | 1.05E-289      |
| Scgb2b7 | -1.65             | 0.011               | 0.292         | 1.46E-95       |
| Cgref1  | -1.57             | 0.028               | 0.616         | 1.01E-199      |
| Wfdc2   | -1.04             | 0.145               | 0.734         | 9.79E-87       |
| Cftr    | -0.78             | 0.008               | 0.251         | 1.32E-85       |
| Clu     | -0.76             | 0.666               | 0.934         | 1.06E-16       |

Journal Pre-proof

| Gene Name  | Avg Log FC | % Healthy Cells | % Inflamed Cells | Adj P Value | Cluster ID |
|------------|------------|-----------------|------------------|-------------|------------|
| Irf8       | -0.274     | 0.966           | 0.023            | 0           | 0          |
| Ido1       | -0.271     | 0.993           | 0.028            | 7.79E-303   | 0          |
| Gbp2       | -0.257     | 0.979           | 0.03             | 4.16E-291   | 0          |
| Gbp4       | -0.265     | 1               | 0.033            | 1.63E-286   | 0          |
| Ptprc      | -0.334     | 0.979           | 0.037            | 1.02E-265   | 0          |
| Cxcl9      | -0.431     | 0.938           | 0.033            | 9.29E-263   | 0          |
| Gclc       | -0.251     | 0.993           | 0.038            | 2.38E-261   | 0          |
| Igkv16-104 | -0.274     | 0.836           | 0.023            | 2.43E-257   | 0          |
| Igkv5-48   | -0.639     | 0.979           | 0.045            | 4.30E-239   | 0          |
| Ccl20      | -0.390     | 0.829           | 0.027            | 4.67E-239   | 0          |
| H2-DMb1    | -0.411     | 1               | 0.049            | 6.33E-237   | 0          |
| Igkv12-41  | -0.280     | 0.61            | 0.007            | 2.54E-232   | 0          |
| Gbp2b      | -0.367     | 1               | 0.052            | 8.48E-228   | 0          |
| Reg3g      | -0.573     | 0.959           | 0.047            | 4.59E-227   | 0          |
| Icam1      | -0.351     | 0.815           | 0.026            | 2.17E-226   | 0          |
| Sprr2a1    | -0.417     | 0.966           | 0.048            | 1.40E-225   | 0          |
| Serpina3g  | -0.268     | 0.726           | 0.02             | 1.12E-222   | 0          |
| Serpinb9   | -0.451     | 0.904           | 0.04             | 2.52E-217   | 0          |
| Mcpt1      | -0.372     | 0.76            | 0.029            | 1.19E-202   | 0          |
| Cxcr4      | -0.267     | 0.685           | 0.021            | 1.04E-199   | 0          |
| Ppp1r3a    | -0.394     | 1               | 0.067            | 1.65E-193   | 0          |
| Uhrf1      | -0.290     | 0.678           | 0.022            | 2.82E-193   | 0          |
| Mlph       | -0.294     | 0.938           | 0.043            | 6.13E-193   | 0          |
| Lyz2       | -0.426     | 0.781           | 0.033            | 1.78E-190   | 0          |
| Igtp       | -0.595     | 1               | 0.069            | 3.65E-189   | 0          |
| Atp2a3     | -0.252     | 0.76            | 0.02             | 1.07E-188   | 0          |
| Gadd45g    | -0.382     | 0.103           | 0.048            | 2.38E-188   | 0          |
| Cd44       | -0.315     | 0.678           | 0.024            | 2.32E-186   | 0          |
| Cela2a     | 0.325      | 0.459           | 0.002            | 3.03E-185   | 0          |
| Parm1      | -0.351     | 0.158           | 0.017            | 3.73E-181   | 0          |
| Mki67      | -0.392     | 0.884           | 0.055            | 1.70E-180   | 0          |
| Irgm1      | -0.677     | 1               | 0.074            | 2.71E-179   | 0          |
| Slfn9      | -0.285     | 0.664           | 0.025            | 3.07E-179   | 0          |
| Top2a      | -0.296     | 0.815           | 0.045            | 1.06E-178   | 0          |
| H2-DMb2    | -0.687     | 1               | 0.075            | 2.11E-177   | 0          |
| Klf2       | -0.256     | 0.932           | 0.047            | 1.34E-176   | 0          |
| Gcnt3      | 0.263      | 1               | 0.08             | 4.17E-171   | 0          |
| Cd52       | -0.367     | 0.692           | 0.032            | 3.12E-167   | 0          |
| Iigp1      | -0.385     | 1               | 0.082            | 4.72E-165   | 0          |
| Hist1h2ap  | -0.255     | 0.986           | 0.08             | 8.90E-165   | 0          |
| Cyba       | -0.514     | 1               | 0.083            | 3.37E-163   | 0          |
| Srgn       | -0.283     | 0.603           | 0.022            | 5.56E-158   | 0          |
| Gsdmc2     | -0.484     | 0.979           | 0.078            | 4.26E-157   | 0          |
| Golm1      | -0.316     | 0.986           | 0.085            | 5.99E-151   | 0          |
| Itln1      | -0.375     | 0.699           | 0.021            | 7.66E-147   | 0          |
| Ttr        | 0.431      | 0.178           | 0.032            | 1.87E-141   | 0          |
| Prss2      | 0.570      | 0.329           | 0.001            | 5.41E-141   | 0          |
| Jchain     | -1.034     | 1               | 0.097            | 7.71E-141   | 0          |
| Ly6d       | -0.395     | 0.767           | 0.046            | 4.76E-139   | 0          |

|               |        |       |       |           |   |
|---------------|--------|-------|-------|-----------|---|
| Nqo1          | 0.270  | 0.185 | 0.029 | 1.12E-138 | 0 |
| Umod          | -0.635 | 0.767 | 0.057 | 4.79E-137 | 0 |
| Pcp4l1        | 0.316  | 0.116 | 0.007 | 2.41E-136 | 0 |
| Pnliprp1      | 0.413  | 0.171 | 0.017 | 4.56E-135 | 0 |
| Chka          | -0.593 | 0.911 | 0.063 | 8.16E-132 | 0 |
| Rac2          | -0.380 | 0.568 | 0.029 | 7.20E-130 | 0 |
| Sox4          | -0.573 | 0.945 | 0.081 | 2.12E-128 | 0 |
| Fkbp11        | -0.386 | 0.178 | 0.044 | 6.30E-128 | 0 |
| Try4          | 0.937  | 0.233 | 0.003 | 3.62E-125 | 0 |
| Pam           | 0.318  | 0.13  | 0.02  | 5.11E-125 | 0 |
| Zfp36l2       | -0.641 | 0.993 | 0.107 | 4.23E-124 | 0 |
| Krt7          | -0.253 | 0.788 | 0.019 | 4.54E-124 | 0 |
| S100a10       | -0.386 | 0.582 | 0.029 | 1.81E-122 | 0 |
| Tnfaip3       | -0.338 | 0.555 | 0.024 | 1.14E-120 | 0 |
| Zg16          | 0.460  | 0.274 | 0     | 1.04E-119 | 0 |
| Tmed6         | 0.449  | 0.219 | 0.025 | 1.38E-114 | 0 |
| H2-DMA        | -0.458 | 1     | 0.119 | 4.25E-114 | 0 |
| Clca3a2       | -0.482 | 0.596 | 0.041 | 9.07E-113 | 0 |
| Tcim          | -0.366 | 0.863 | 0.055 | 1.51E-110 | 0 |
| Ccdc34        | -0.397 | 0.849 | 0.048 | 2.20E-110 | 0 |
| Papss2        | -0.257 | 0.849 | 0.049 | 1.06E-109 | 0 |
| H2-T23        | -0.955 | 1     | 0.123 | 2.46E-109 | 0 |
| 2200002D01Rik | -0.639 | 0.986 | 0.123 | 4.45E-103 | 0 |
| Sprr1a        | -0.732 | 0.986 | 0.125 | 6.49E-101 | 0 |
| Sox9          | -0.523 | 0.993 | 0.131 | 6.38E-100 | 0 |
| Wars          | -0.664 | 0.993 | 0.132 | 1.93E-98  | 0 |
| Tmem54        | -0.462 | 0.911 | 0.089 | 2.51E-98  | 0 |
| Far1          | -0.498 | 1     | 0.137 | 1.20E-97  | 0 |
| Dusp1         | -0.396 | 0.945 | 0.108 | 1.21E-97  | 0 |
| Akr1c14       | 0.290  | 0.568 | 0.012 | 4.53E-97  | 0 |
| Ly6e          | -0.655 | 1     | 0.137 | 3.07E-96  | 0 |
| Cebpb         | -0.551 | 0.774 | 0.046 | 2.24E-95  | 0 |
| Igha          | -1.229 | 1     | 0.138 | 2.76E-95  | 0 |
| Oasl1         | -0.327 | 0.521 | 0.028 | 1.62E-93  | 0 |
| Spink1        | 0.523  | 0.199 | 0     | 5.79E-86  | 0 |
| Cyp2c65       | -0.425 | 0.788 | 0.038 | 6.12E-86  | 0 |
| Ifitm3        | -0.612 | 0.993 | 0.146 | 8.06E-86  | 0 |
| Igkc          | -1.378 | 1     | 0.154 | 1.32E-81  | 0 |
| St3gal4       | -0.327 | 0.719 | 0.025 | 4.10E-81  | 0 |
| Gipc2         | 0.250  | 0.788 | 0.041 | 1.10E-80  | 0 |
| Chil4         | -0.817 | 0.788 | 0.066 | 2.98E-80  | 0 |
| Lgals4        | -0.272 | 0.267 | 0.03  | 3.04E-77  | 0 |
| Sectm1b       | -0.251 | 0.603 | 0.018 | 1.14E-76  | 0 |
| Tmem176b      | -0.387 | 0.815 | 0.064 | 5.37E-76  | 0 |
| Plvap         | 0.309  | 0.699 | 0.006 | 5.75E-76  | 0 |
| Ifi27l2a      | -0.417 | 0.733 | 0.04  | 1.47E-73  | 0 |
| lfrd1         | -0.316 | 0.808 | 0.061 | 7.06E-71  | 0 |
| Ubd           | -1.005 | 1     | 0.171 | 3.05E-70  | 0 |
| Cotl1         | -0.298 | 0.842 | 0.086 | 6.87E-67  | 0 |
| Mcm5          | -0.272 | 0.377 | 0.019 | 1.43E-66  | 0 |



|               |        |       |       |          |   |
|---------------|--------|-------|-------|----------|---|
| mt-Nd3        | -0.376 | 0.973 | 0.165 | 3.71E-66 | 0 |
| Ctse          | 0.283  | 0.925 | 0.143 | 1.42E-64 | 0 |
| Rflnb         | -0.506 | 0.918 | 0.135 | 2.05E-64 | 0 |
| Psmb8         | -0.652 | 1     | 0.184 | 1.20E-62 | 0 |
| Gkn3          | -1.011 | 1     | 0.184 | 2.38E-62 | 0 |
| Il33          | -0.315 | 0.705 | 0.027 | 7.32E-62 | 0 |
| Cd59a         | 0.395  | 0.308 | 0.014 | 1.74E-59 | 0 |
| Laptm5        | -0.360 | 0.329 | 0.027 | 3.14E-55 | 0 |
| Areg          | -0.556 | 0.74  | 0.046 | 1.56E-54 | 0 |
| Pim1          | -0.319 | 0.644 | 0.025 | 1.77E-51 | 0 |
| Spink4        | -0.780 | 1     | 0.207 | 4.54E-51 | 0 |
| Basp1         | -0.319 | 0.527 | 0.029 | 1.25E-50 | 0 |
| Lypd8         | -0.501 | 0.932 | 0.17  | 8.82E-50 | 0 |
| Ldhb          | -0.440 | 0.301 | 0.072 | 2.56E-47 | 0 |
| Wfdc2         | -0.432 | 0.877 | 0.141 | 1.14E-46 | 0 |
| Pglyrp1       | -0.913 | 0.836 | 0.117 | 8.04E-44 | 0 |
| ApoE          | -0.282 | 0.733 | 0.052 | 1.26E-43 | 0 |
| Smpd3         | -0.431 | 0.719 | 0.044 | 2.05E-41 | 0 |
| Zfp36         | -0.340 | 0.89  | 0.163 | 7.62E-41 | 0 |
| Foxq1         | -0.897 | 0.973 | 0.217 | 3.36E-39 | 0 |
| Gfpt1         | -0.603 | 1     | 0.241 | 2.88E-37 | 0 |
| Cgref1        | -0.368 | 0.685 | 0.028 | 8.76E-37 | 0 |
| Hspa1b        | -1.091 | 1     | 0.244 | 5.63E-35 | 0 |
| Anxa2         | -0.490 | 0.74  | 0.07  | 8.51E-35 | 0 |
| Dmbt1         | -1.390 | 0.986 | 0.235 | 1.51E-34 | 0 |
| Cd74          | -0.391 | 1     | 0.873 | 9.53E-34 | 0 |
| Krt5          | -0.303 | 0.226 | 0.021 | 1.31E-33 | 0 |
| 1810010D01Rik | 0.303  | 0.911 | 0.216 | 2.32E-32 | 0 |
| Tst           | 0.281  | 0.692 | 0.046 | 8.90E-30 | 0 |
| Tnni3         | -0.351 | 0.336 | 0.074 | 9.30E-30 | 0 |
| Hmgcs1        | -0.330 | 0.781 | 0.115 | 7.16E-29 | 0 |
| Pnliprp2      | 0.342  | 0.541 | 0.035 | 2.25E-26 | 0 |
| Gm26825       | 0.368  | 0.507 | 0.019 | 3.46E-26 | 0 |
| Cfi           | -0.278 | 0.705 | 0.063 | 4.10E-26 | 0 |
| Chga          | -0.664 | 0.664 | 0.05  | 4.30E-24 | 0 |
| Sst           | -0.681 | 0.726 | 0.086 | 8.95E-24 | 0 |
| Nupr1         | 0.532  | 0.37  | 0.052 | 1.61E-23 | 0 |
| Neat1         | -0.792 | 0.945 | 0.257 | 1.53E-21 | 0 |
| Cym           | -1.352 | 1     | 0.8   | 1.67E-21 | 0 |
| Lbh           | -0.250 | 0.664 | 0.044 | 8.44E-21 | 0 |
| Phlda1        | -0.294 | 0.377 | 0.119 | 2.91E-20 | 0 |
| Olfm4         | -0.273 | 0.548 | 0.018 | 9.48E-19 | 0 |
| AY036118      | 0.498  | 1     | 0.924 | 2.17E-18 | 0 |
| Atf3          | -0.763 | 0.801 | 0.169 | 1.78E-17 | 0 |
| 2210404E10Rik | -0.588 | 0.678 | 0.065 | 2.23E-17 | 0 |
| Smim6         | -0.303 | 0.753 | 0.137 | 6.78E-16 | 0 |
| Nfkbia        | -0.417 | 0.397 | 0.052 | 8.23E-16 | 0 |
| Gm3776        | 0.520  | 0.637 | 0.039 | 2.18E-14 | 0 |
| Pgc           | 0.979  | 1     | 0.999 | 8.37E-14 | 0 |
| Gstp1         | -0.514 | 0.432 | 0.293 | 1.33E-13 | 0 |

|           |        |       |       |             |   |
|-----------|--------|-------|-------|-------------|---|
| Cela1     | 0.503  | 0.37  | 0.018 | 2.40E-13    | 0 |
| AW112010  | -0.622 | 1     | 0.331 | 3.63E-13    | 0 |
| Glod5     | 0.352  | 0.507 | 0.013 | 4.29E-13    | 0 |
| Gm26917   | 1.276  | 1     | 0.35  | 8.36E-13    | 0 |
| S100a1    | -0.334 | 0.76  | 0.16  | 9.52E-13    | 0 |
| Sprr2a3   | -0.748 | 1     | 0.759 | 1.86E-12    | 0 |
| Pdia2     | 0.682  | 0.61  | 0.022 | 3.46E-12    | 0 |
| Slbp      | -0.318 | 0.637 | 0.047 | 3.57E-12    | 0 |
| Atp4a     | 0.515  | 1     | 0.402 | 4.07E-12    | 0 |
| Fam3b     | -0.272 | 0.384 | 0.03  | 5.58E-12    | 0 |
| Furin     | 0.401  | 0.651 | 0.066 | 4.92E-11    | 0 |
| Prr13     | 0.333  | 0.733 | 0.16  | 9.28E-11    | 0 |
| Hbb-bs    | -0.463 | 0.596 | 0.039 | 3.33E-10    | 0 |
| Gif       | 0.674  | 0.952 | 0.517 | 4.56E-10    | 0 |
| Gstm1     | 0.276  | 0.74  | 0.17  | 2.90E-09    | 0 |
| Pigr      | -1.328 | 1     | 0.351 | 1.55E-08    | 0 |
| Serpinb1a | -0.687 | 0.644 | 0.072 | 1.64E-08    | 0 |
| Pla2g1b   | 0.679  | 0.986 | 0.996 | 7.29E-08    | 0 |
| Apoa1     | -0.673 | 0.836 | 0.253 | 9.79E-08    | 0 |
| H2-Eb1    | -0.861 | 1     | 0.357 | 1.20E-07    | 0 |
| Lars2     | -0.459 | 1     | 0.384 | 1.34E-07    | 0 |
| Ucp2      | 0.358  | 0.884 | 0.356 | 1.41E-07    | 0 |
| Malat1    | 0.292  | 1     | 0.802 | 5.89E-06    | 0 |
| Ghrl      | 2.392  | 1     | 0.409 | 8.55E-06    | 0 |
| Rpl23a    | -0.377 | 0.801 | 0.25  | 3.66E-05    | 0 |
| Clps      | 0.528  | 0.986 | 0.999 | 3.71E-05    | 0 |
| Gm42418   | 0.919  | 1     | 0.997 | 3.79E-05    | 0 |
| H2-K1     | -0.610 | 1     | 0.661 | 9.62E-05    | 0 |
| Dnajb1    | -0.671 | 0.466 | 0.122 | 0.000122168 | 0 |
| Hamp2     | -0.354 | 0.692 | 0.152 | 0.000342959 | 0 |
| Gsto1     | -0.374 | 0.76  | 0.229 | 0.001270507 | 0 |
| Tpm1      | -0.331 | 0.678 | 0.14  | 0.001418851 | 0 |
| Ube2s     | -0.261 | 0.445 | 0.045 | 0.002342744 | 0 |
| Spc24     | 0.355  | 0.432 | 0.017 | 0.004928632 | 0 |
| Muc6      | -0.856 | 1     | 0.637 | 0.007758716 | 0 |
| Gsn       | -0.253 | 0.596 | 0.057 | 0.014064928 | 0 |
| Hells     | -0.298 | 0.568 | 0.027 | 0.037211669 | 0 |
| Ly6a      | -1.131 | 1     | 0.409 | 0.040946546 | 0 |
| Bmp2      | -0.251 | 0.322 | 0.017 | 0.123192733 | 0 |
| Hspa1a    | -0.610 | 0.678 | 0.165 | 0.189602675 | 0 |
| Anxa3     | -0.317 | 0.555 | 0.03  | 0.687904016 | 0 |
| Chia1     | 0.907  | 0.795 | 0.411 | 1           | 0 |
| Mgst2     | -0.581 | 0.582 | 0.06  | 1           | 0 |
| Gpx2      | -0.902 | 0.726 | 0.232 | 1           | 0 |
| Psca      | -0.350 | 0.945 | 0.698 | 1           | 0 |
| Fabp5     | -0.448 | 0.589 | 0.255 | 1           | 0 |
| Gkn2      | 0.547  | 0.918 | 0.7   | 1           | 0 |
| Tubb4b    | 0.273  | 0.514 | 0.104 | 1           | 0 |
| Agr2      | -0.329 | 1     | 0.537 | 1           | 0 |
| Anxa10    | -0.264 | 0.623 | 0.295 | 1           | 0 |

|               |        |       |       |           |   |
|---------------|--------|-------|-------|-----------|---|
| Pdlim1        | -0.395 | 0.493 | 0.038 | 1         | 0 |
| H2-Ab1        | -0.880 | 1     | 0.456 | 1         | 0 |
| Anpep         | -0.262 | 0.541 | 0.037 | 1         | 0 |
| Edem1         | -0.330 | 0.493 | 0.032 | 1         | 0 |
| Tkt           | -0.323 | 0.521 | 0.095 | 1         | 0 |
| Lgals3        | -0.420 | 0.37  | 0.032 | 1         | 0 |
| Rpl9-ps6      | -0.529 | 0.938 | 0.508 | 1         | 0 |
| Muc5ac        | -0.528 | 0.651 | 0.277 | 1         | 0 |
| H2-Aa         | -0.966 | 1     | 0.521 | 1         | 0 |
| Tff1          | 0.263  | 1     | 0.976 | 1         | 0 |
| Sytl2         | -0.356 | 0.39  | 0.027 | 1         | 0 |
| Bpifb1        | -1.146 | 1     | 0.505 | 1         | 0 |
| Sfn           | -0.293 | 0.514 | 0.046 | 1         | 0 |
| Fam13a        | 0.437  | 0.99  | 0.092 | 5.30E-181 | 1 |
| Serpina3g     | -0.342 | 0.949 | 0.1   | 6.21E-162 | 1 |
| Rgs5          | -0.265 | 0.865 | 0.078 | 2.22E-158 | 1 |
| Cxcl9         | -0.428 | 0.827 | 0.073 | 4.64E-151 | 1 |
| Reg1          | -0.416 | 0.967 | 0.119 | 1.36E-146 | 1 |
| Ddx60         | -0.325 | 1     | 0.139 | 5.35E-140 | 1 |
| C4b           | -0.312 | 1     | 0.143 | 3.19E-135 | 1 |
| Mpeg1         | -0.262 | 0.996 | 0.147 | 9.15E-131 | 1 |
| Ido1          | -0.444 | 0.988 | 0.151 | 3.07E-125 | 1 |
| Socs1         | -0.334 | 0.963 | 0.162 | 7.40E-109 | 1 |
| Gm4951        | -0.377 | 1     | 0.18  | 4.12E-105 | 1 |
| Gsdmc2        | -0.286 | 0.78  | 0.092 | 4.95E-100 | 1 |
| Gm4841        | -0.537 | 1     | 0.201 | 1.45E-90  | 1 |
| 2010007H06Rik | -0.284 | 0.992 | 0.205 | 2.31E-89  | 1 |
| F830016B08Rik | -0.647 | 1     | 0.203 | 3.05E-89  | 1 |
| Cxcl10        | -0.552 | 0.576 | 0.072 | 3.83E-82  | 1 |
| Irf8          | -0.354 | 1     | 0.22  | 3.89E-78  | 1 |
| Clca3a2       | -0.428 | 0.953 | 0.207 | 2.53E-77  | 1 |
| Scgb2b7       | -0.288 | 0.812 | 0.081 | 7.80E-77  | 1 |
| Isg15         | -0.304 | 0.969 | 0.207 | 3.11E-74  | 1 |
| Tgtp1         | -0.427 | 0.996 | 0.228 | 1.29E-71  | 1 |
| Reg3g         | -0.800 | 0.988 | 0.245 | 7.63E-62  | 1 |
| Tgtp2         | -0.434 | 1     | 0.25  | 4.74E-61  | 1 |
| Serpinb1a     | -0.393 | 0.886 | 0.187 | 4.65E-50  | 1 |
| Gbp7          | -0.618 | 1     | 0.273 | 7.48E-50  | 1 |
| Abhd2         | -0.253 | 0.998 | 0.293 | 1.70E-44  | 1 |
| Icam1         | -0.668 | 0.902 | 0.225 | 1.20E-40  | 1 |
| H2-Aa         | -0.538 | 1     | 0.906 | 7.59E-39  | 1 |
| Lpl           | 0.264  | 0.322 | 0.011 | 7.00E-37  | 1 |
| Serping1      | -0.349 | 0.998 | 0.309 | 1.28E-34  | 1 |
| S100a6        | -0.548 | 0.994 | 0.326 | 1.80E-32  | 1 |
| Nupr1         | 0.497  | 0.765 | 0.148 | 6.06E-31  | 1 |
| Gbp4          | -0.940 | 1     | 0.317 | 8.54E-31  | 1 |
| Plk2          | 0.279  | 0.778 | 0.147 | 2.81E-30  | 1 |
| H2-Ab1        | -0.473 | 1     | 0.907 | 3.62E-30  | 1 |
| Gbp2          | -0.608 | 1     | 0.319 | 5.17E-30  | 1 |
| H2-Eb1        | -0.449 | 1     | 0.879 | 1.26E-27  | 1 |

|               |        |       |       |             |   |
|---------------|--------|-------|-------|-------------|---|
| Pgc           | 0.270  | 1     | 0.998 | 1.34E-22    | 1 |
| Gbp2b         | -0.910 | 1     | 0.344 | 1.32E-21    | 1 |
| Ifi47         | -0.548 | 0.998 | 0.352 | 3.59E-19    | 1 |
| Sst           | -0.280 | 0.696 | 0.093 | 7.56E-19    | 1 |
| Irf1          | -0.511 | 0.998 | 0.373 | 1.29E-17    | 1 |
| Dmbt1         | -0.754 | 0.982 | 0.395 | 1.19E-14    | 1 |
| Furin         | 1.006  | 0.722 | 0.192 | 1.79E-14    | 1 |
| Pigr          | -0.559 | 1     | 0.888 | 4.22E-13    | 1 |
| Cyba          | -0.269 | 0.967 | 0.394 | 7.36E-13    | 1 |
| Tff2          | 0.561  | 0.947 | 0.559 | 1.26E-10    | 1 |
| H2-T23        | -0.687 | 1     | 0.667 | 2.49E-06    | 1 |
| Ghrl          | -0.275 | 0.998 | 0.461 | 8.33E-06    | 1 |
| Chka          | -0.286 | 0.886 | 0.394 | 2.10E-05    | 1 |
| AW112010      | -1.272 | 1     | 0.625 | 0.000204252 | 1 |
| Ubd           | -1.202 | 1     | 0.426 | 0.001850726 | 1 |
| Wars          | -0.874 | 1     | 0.638 | 0.002373423 | 1 |
| Igtp          | -0.782 | 1     | 0.438 | 0.011289351 | 1 |
| Gkn2          | 0.329  | 0.767 | 0.331 | 0.012918493 | 1 |
| Nfkbia        | -0.300 | 0.78  | 0.301 | 0.014876712 | 1 |
| H2-DMA        | -0.531 | 1     | 0.637 | 0.028111761 | 1 |
| Ppp1r3a       | -0.275 | 0.92  | 0.458 | 0.031400926 | 1 |
| Psmb8         | -0.424 | 1     | 0.681 | 0.128955455 | 1 |
| Nfe2l2        | -0.254 | 0.951 | 0.492 | 0.15415601  | 1 |
| Irgm1         | -0.621 | 1     | 0.449 | 0.167508057 | 1 |
| Cym           | -1.964 | 1     | 0.638 | 0.832658083 | 1 |
| Malat1        | 0.524  | 1     | 0.989 | 0.864498273 | 1 |
| Ly6e          | -0.705 | 1     | 0.615 | 0.989197025 | 1 |
| Sprr2a3       | -0.957 | 1     | 0.509 | 1           | 1 |
| Ifitm3        | -0.757 | 1     | 0.607 | 1           | 1 |
| Clu           | -0.282 | 0.996 | 0.926 | 1           | 1 |
| Ly6a          | -1.509 | 1     | 0.588 | 1           | 1 |
| Cyr61         | 0.316  | 0.655 | 0.214 | 1           | 1 |
| Chia1         | 0.881  | 0.804 | 0.452 | 1           | 1 |
| 2210407C18Rik | -0.789 | 0.988 | 0.53  | 1           | 1 |
| C2cd4b        | 0.325  | 0.52  | 0.155 | 1           | 1 |
| Rbp2          | 0.327  | 0.612 | 0.17  | 1           | 1 |
| Gm26917       | -0.252 | 0.994 | 0.784 | 1           | 1 |
| H2-DMb2       | -0.506 | 1     | 0.596 | 1           | 1 |
| Lgals9        | -0.268 | 0.988 | 0.567 | 1           | 1 |
| Clps          | 0.275  | 1     | 0.998 | 1           | 1 |
| Sox4          | -0.414 | 0.941 | 0.551 | 1           | 1 |
| Mfge8         | -0.285 | 0.906 | 0.531 | 1           | 1 |
| Tmem176b      | -0.303 | 0.827 | 0.454 | 1           | 1 |
| Bpifb1        | -0.436 | 1     | 0.66  | 1           | 1 |
| Far1          | -0.380 | 0.961 | 0.547 | 1           | 1 |
| Igip1         | -1.088 | 1     | 0.516 | 1           | 1 |
| Neat1         | -0.318 | 0.996 | 0.752 | 1           | 1 |
| Muc6          | -0.324 | 0.994 | 0.82  | 1           | 1 |
| Gkn3          | -0.363 | 0.989 | 0.113 | 1.11E-37    | 2 |
| Clic6         | -0.254 | 0.999 | 0.13  | 2.54E-37    | 2 |

|               |        |       |       |             |   |
|---------------|--------|-------|-------|-------------|---|
| Atp4a         | -0.280 | 0.997 | 0.148 | 1.46E-32    | 2 |
| Irf1          | -0.281 | 1     | 0.157 | 3.34E-32    | 2 |
| Sst           | -1.868 | 0.938 | 0.096 | 4.81E-32    | 2 |
| F830016B08Rik | -0.389 | 1     | 0.157 | 3.36E-31    | 2 |
| Zfp3612       | -0.281 | 1     | 0.165 | 4.87E-31    | 2 |
| Pga5          | -0.451 | 0.999 | 0.2   | 5.00E-30    | 2 |
| Thbs1         | -0.508 | 0.895 | 0.078 | 8.43E-29    | 2 |
| Lbh           | -0.574 | 0.931 | 0.122 | 1.33E-27    | 2 |
| Krt19         | -0.250 | 0.948 | 0.139 | 4.49E-27    | 2 |
| 2010007H06Rik | -0.263 | 0.741 | 0.017 | 3.04E-25    | 2 |
| Spata7        | -0.257 | 0.819 | 0.017 | 4.53E-24    | 2 |
| Chka          | -0.301 | 0.994 | 0.209 | 6.58E-24    | 2 |
| S100a11       | -0.282 | 0.999 | 0.226 | 9.47E-21    | 2 |
| mt-Nd3        | -0.410 | 1     | 0.27  | 1.49E-20    | 2 |
| Sox4          | -0.416 | 0.996 | 0.235 | 4.64E-20    | 2 |
| Wars          | -0.324 | 0.987 | 0.226 | 8.39E-20    | 2 |
| Apoa1         | -0.686 | 0.997 | 0.226 | 1.90E-19    | 2 |
| Arl6ip1       | -0.453 | 0.898 | 0.148 | 1.45E-18    | 2 |
| Iigp1         | -0.690 | 1     | 0.252 | 1.85E-18    | 2 |
| S100a6        | -0.471 | 1     | 0.27  | 6.74E-17    | 2 |
| H2-T23        | -0.496 | 1     | 0.252 | 1.06E-16    | 2 |
| Sprr2a3       | -0.575 | 1     | 0.313 | 6.76E-14    | 2 |
| Fam13a        | -0.403 | 0.884 | 0.174 | 9.25E-14    | 2 |
| Gfpt1         | -0.345 | 1     | 0.313 | 8.24E-13    | 2 |
| 2210407C18Rik | -0.487 | 0.997 | 0.304 | 6.55E-12    | 2 |
| Ppp1r3a       | -0.537 | 1     | 0.313 | 1.59E-10    | 2 |
| Ifi27         | -0.561 | 0.956 | 0.287 | 3.96E-10    | 2 |
| Crip2         | -0.269 | 0.803 | 0.139 | 6.17E-10    | 2 |
| Soat1         | -0.522 | 0.903 | 0.243 | 1.69E-09    | 2 |
| Muc6          | -0.973 | 1     | 0.33  | 4.54E-09    | 2 |
| Tmsb10        | -0.380 | 1     | 0.357 | 1.42E-08    | 2 |
| 1810041H14Rik | -0.253 | 0.851 | 0.209 | 7.64E-08    | 2 |
| Tff2          | -0.281 | 0.999 | 0.443 | 3.54E-07    | 2 |
| Ghrl          | -0.516 | 1     | 0.443 | 1.12E-06    | 2 |
| Pigr          | -0.639 | 1     | 0.374 | 2.34E-06    | 2 |
| Agr2          | -0.794 | 1     | 0.4   | 5.31E-06    | 2 |
| Cd74          | -0.554 | 1     | 0.896 | 8.53E-06    | 2 |
| H2-K1         | -0.672 | 1     | 0.791 | 1.15E-05    | 2 |
| Pdia2         | -0.600 | 0.993 | 0.417 | 1.52E-05    | 2 |
| Hspa1b        | -0.964 | 1     | 0.417 | 0.000211082 | 2 |
| Neat1         | -0.803 | 0.998 | 0.461 | 0.000222381 | 2 |
| Hist2h2aa1    | -0.387 | 0.969 | 0.374 | 0.000291055 | 2 |
| Hes1          | -0.320 | 0.75  | 0.157 | 0.001051815 | 2 |
| Gkn1          | -0.321 | 0.98  | 0.435 | 0.001071079 | 2 |
| Krt8          | -0.470 | 0.942 | 0.435 | 0.001132309 | 2 |
| Cited2        | -0.510 | 0.914 | 0.365 | 0.003404014 | 2 |
| Fam46c        | -0.322 | 0.883 | 0.365 | 0.007971499 | 2 |
| Prdx1         | -0.273 | 0.997 | 0.496 | 0.035885963 | 2 |
| Cym           | -2.787 | 1     | 0.461 | 0.079849554 | 2 |
| Gm26917       | -0.804 | 1     | 0.539 | 0.096264933 | 2 |

|           |        |       |       |             |   |
|-----------|--------|-------|-------|-------------|---|
| Ifitm3    | -0.272 | 0.984 | 0.443 | 0.350598278 | 2 |
| Cckar     | -0.294 | 0.877 | 0.417 | 0.598658869 | 2 |
| Pnliprp2  | -0.526 | 1     | 0.774 | 1           | 2 |
| Derl3     | -0.332 | 0.703 | 0.2   | 1           | 2 |
| Tcim      | -0.293 | 0.763 | 0.322 | 1           | 2 |
| Gstp1     | -0.301 | 0.854 | 0.417 | 1           | 2 |
| Cyr61     | -0.453 | 0.689 | 0.174 | 1           | 2 |
| H2-Ab1    | -0.632 | 1     | 0.635 | 1           | 2 |
| Pnliprp1  | -0.407 | 0.799 | 0.313 | 1           | 2 |
| Anpep     | -0.485 | 0.851 | 0.391 | 1           | 2 |
| Necab1    | -0.282 | 0.691 | 0.2   | 1           | 2 |
| H2-Eb1    | -0.490 | 1     | 0.513 | 1           | 2 |
| Lpl       | -0.260 | 0.633 | 0.148 | 1           | 2 |
| Atf3      | -0.966 | 0.571 | 0.27  | 1           | 2 |
| Ucp2      | -0.438 | 0.939 | 0.513 | 1           | 2 |
| Furin     | -0.718 | 0.999 | 0.861 | 1           | 2 |
| Gif       | -0.277 | 1     | 0.983 | 1           | 2 |
| Dnajb1    | -0.351 | 0.668 | 0.243 | 1           | 2 |
| AY036118  | -0.309 | 0.999 | 0.843 | 1           | 2 |
| Lars2     | -0.669 | 0.999 | 0.635 | 1           | 2 |
| Malat1    | -1.366 | 1     | 0.8   | 1           | 2 |
| Ttr       | -0.295 | 0.815 | 0.461 | 1           | 2 |
| Nupr1     | -0.366 | 0.934 | 0.713 | 1           | 2 |
| Tmed3     | -0.423 | 0.966 | 0.574 | 1           | 2 |
| Tff1      | -0.296 | 1     | 0.748 | 1           | 2 |
| Bpifb1    | -0.859 | 1     | 0.67  | 1           | 2 |
| Insig1    | -0.250 | 0.539 | 0.096 | 1           | 2 |
| Actb      | -0.418 | 0.998 | 0.678 | 1           | 2 |
| Clu       | -0.545 | 1     | 0.67  | 1           | 2 |
| H2-Aa     | -0.463 | 1     | 0.6   | 1           | 2 |
| AY036118  | 0.962  | 0.957 | 0.019 | 1.67E-175   | 3 |
| Cxcl9     | -0.261 | 0.776 | 0.051 | 2.30E-115   | 3 |
| Cxcl10    | -0.291 | 0.78  | 0.054 | 3.75E-114   | 3 |
| Sprr1a    | -0.508 | 1     | 0.118 | 5.64E-109   | 3 |
| Reg1      | -0.477 | 1     | 0.12  | 2.57E-107   | 3 |
| Ido1      | -0.377 | 1     | 0.126 | 4.39E-103   | 3 |
| Sprr2a1   | -0.288 | 0.984 | 0.123 | 1.20E-101   | 3 |
| Cxcl1     | -0.326 | 0.953 | 0.117 | 1.62E-100   | 3 |
| Itln1     | -0.384 | 0.925 | 0.113 | 1.02E-97    | 3 |
| Fam13a    | -0.364 | 0.996 | 0.134 | 4.49E-97    | 3 |
| Serpina3g | -0.452 | 0.906 | 0.117 | 3.78E-91    | 3 |
| Gsdmc2    | -0.483 | 0.992 | 0.142 | 7.99E-91    | 3 |
| Gbp7      | -0.257 | 0.992 | 0.142 | 4.52E-89    | 3 |
| Chil4     | -0.587 | 0.866 | 0.062 | 1.85E-87    | 3 |
| Icam1     | -0.412 | 0.992 | 0.153 | 1.88E-83    | 3 |
| Clca3a2   | -0.327 | 0.913 | 0.131 | 4.93E-83    | 3 |
| Gm4951    | -0.295 | 0.972 | 0.152 | 1.10E-80    | 3 |
| Sftpd     | -0.251 | 0.748 | 0.085 | 3.04E-80    | 3 |
| Wfdc18    | -0.267 | 0.634 | 0.061 | 3.46E-77    | 3 |
| Areg      | -0.279 | 0.909 | 0.11  | 3.75E-73    | 3 |

|          |        |       |       |          |   |
|----------|--------|-------|-------|----------|---|
| Ovol1    | -0.311 | 0.945 | 0.135 | 6.80E-73 | 3 |
| Gbp2     | -0.406 | 1     | 0.19  | 1.84E-64 | 3 |
| C4b      | -0.486 | 0.972 | 0.184 | 4.00E-63 | 3 |
| Gbp4     | -0.630 | 1     | 0.193 | 1.22E-62 | 3 |
| Igf1     | 0.319  | 0.248 | 0.007 | 3.47E-59 | 3 |
| H2-T23   | -0.277 | 1     | 0.21  | 1.16E-54 | 3 |
| Irf8     | -0.343 | 1     | 0.211 | 4.97E-54 | 3 |
| Ier3     | -0.363 | 0.972 | 0.201 | 1.72E-50 | 3 |
| Irgm1    | -0.344 | 1     | 0.223 | 8.75E-50 | 3 |
| Galnt6   | -0.307 | 0.972 | 0.217 | 4.09E-47 | 3 |
| Reg3g    | -1.112 | 1     | 0.232 | 2.44E-45 | 3 |
| Pgc      | 0.974  | 1     | 0.903 | 3.92E-45 | 3 |
| Nupr1    | -0.725 | 0.283 | 0.143 | 2.92E-43 | 3 |
| Cym      | -1.648 | 1     | 0.25  | 5.90E-43 | 3 |
| Edn1     | -0.493 | 0.866 | 0.152 | 2.68E-38 | 3 |
| Gkn3     | -1.388 | 0.984 | 0.25  | 4.48E-38 | 3 |
| Cd74     | -0.574 | 1     | 0.984 | 1.02E-36 | 3 |
| Anxa2    | -0.374 | 1     | 0.261 | 1.40E-36 | 3 |
| Furin    | 0.738  | 0.299 | 0.058 | 1.73E-36 | 3 |
| St3gal4  | -0.457 | 1     | 0.257 | 1.96E-36 | 3 |
| H2-DMb2  | -0.585 | 1     | 0.264 | 1.00E-33 | 3 |
| Idi1     | -0.283 | 0.882 | 0.205 | 8.56E-28 | 3 |
| Gm26532  | -0.440 | 0.862 | 0.19  | 4.85E-26 | 3 |
| Ifi47    | -0.482 | 1     | 0.293 | 2.20E-25 | 3 |
| Hmgcs1   | -0.313 | 0.996 | 0.307 | 3.12E-25 | 3 |
| AW112010 | -1.649 | 1     | 0.767 | 8.51E-24 | 3 |
| Anxa1    | -0.406 | 0.917 | 0.249 | 1.09E-22 | 3 |
| Sprr2a3  | -1.190 | 1     | 0.802 | 6.70E-22 | 3 |
| Gbp2b    | -0.855 | 1     | 0.305 | 9.76E-22 | 3 |
| Me1      | -0.482 | 0.992 | 0.307 | 1.51E-21 | 3 |
| Ghrl     | 0.524  | 0.724 | 0.082 | 4.05E-21 | 3 |
| Gm3776   | 0.430  | 0.744 | 0.114 | 6.13E-21 | 3 |
| Hmgn2    | -0.355 | 0.437 | 0.335 | 2.09E-18 | 3 |
| C3       | -0.446 | 0.441 | 0.113 | 4.23E-18 | 3 |
| Sfn      | -0.579 | 0.913 | 0.264 | 8.65E-18 | 3 |
| Ppp1r3a  | 0.306  | 0.776 | 0.176 | 3.01E-17 | 3 |
| Irf1     | -0.554 | 1     | 0.33  | 2.55E-16 | 3 |
| Pigr     | -0.718 | 1     | 0.886 | 5.74E-16 | 3 |
| Krt8     | -0.542 | 1     | 0.895 | 3.26E-15 | 3 |
| Gpx2     | -0.910 | 1     | 0.769 | 4.10E-15 | 3 |
| Ifi27    | -0.270 | 1     | 0.357 | 2.82E-14 | 3 |
| Fdps     | -0.294 | 0.933 | 0.318 | 4.06E-14 | 3 |
| Tuba1c   | -0.266 | 0.894 | 0.281 | 5.98E-14 | 3 |
| H2-K1    | -0.367 | 1     | 0.959 | 1.52E-13 | 3 |
| Pla2g1b  | 0.891  | 0.992 | 0.632 | 1.85E-13 | 3 |
| Tmsb10   | -0.450 | 1     | 0.931 | 1.89E-13 | 3 |
| H2-Eb1   | -0.555 | 1     | 0.853 | 1.90E-13 | 3 |
| Oit1     | 0.455  | 0.969 | 0.67  | 2.02E-13 | 3 |
| Igtp     | -0.627 | 1     | 0.345 | 3.04E-13 | 3 |
| H2-Aa    | -0.570 | 1     | 0.84  | 4.38E-13 | 3 |

|               |        |       |       |             |   |
|---------------|--------|-------|-------|-------------|---|
| H2-Ab1        | -0.607 | 1     | 0.914 | 4.04E-12    | 3 |
| Iigp1         | -0.682 | 1     | 0.358 | 1.58E-11    | 3 |
| Ifrd1         | -0.497 | 0.976 | 0.366 | 1.95E-10    | 3 |
| NdrG1         | -0.300 | 0.437 | 0.163 | 2.26E-10    | 3 |
| Nr4a1         | -0.521 | 0.957 | 0.345 | 9.42E-10    | 3 |
| Bst2          | -0.302 | 1     | 0.376 | 1.71E-09    | 3 |
| Arl14         | -0.263 | 0.937 | 0.361 | 1.91E-09    | 3 |
| Smim6         | 0.251  | 0.992 | 0.557 | 3.63E-09    | 3 |
| Bpifb1        | -0.998 | 1     | 0.779 | 4.89E-09    | 3 |
| Ttr           | 0.547  | 0.654 | 0.081 | 4.96E-09    | 3 |
| Tstd1         | 0.262  | 0.807 | 0.317 | 6.44E-09    | 3 |
| Pgd           | -0.291 | 0.906 | 0.33  | 2.55E-08    | 3 |
| S100a11       | -0.414 | 1     | 0.879 | 2.78E-08    | 3 |
| AA467197      | -0.684 | 0.925 | 0.328 | 3.33E-08    | 3 |
| Gm42418       | 0.956  | 1     | 0.543 | 3.97E-08    | 3 |
| PsmB8         | -0.642 | 1     | 0.713 | 7.14E-08    | 3 |
| Ppp1r15a      | -0.384 | 0.846 | 0.275 | 8.42E-08    | 3 |
| Phlda1        | -0.480 | 0.965 | 0.376 | 2.86E-07    | 3 |
| Anxa3         | -0.324 | 0.74  | 0.185 | 3.62E-06    | 3 |
| Cyba          | -0.309 | 1     | 0.426 | 6.17E-06    | 3 |
| Plk2          | -0.419 | 0.819 | 0.266 | 9.42E-06    | 3 |
| Gsta4         | 0.257  | 0.992 | 0.723 | 4.06E-05    | 3 |
| Prr13         | -0.423 | 0.906 | 0.749 | 4.22E-05    | 3 |
| Zfp36         | -0.749 | 0.996 | 0.704 | 5.79E-05    | 3 |
| Tubb5         | -0.259 | 0.992 | 0.449 | 6.39E-05    | 3 |
| Ly6a          | -1.284 | 1     | 0.398 | 8.37E-05    | 3 |
| S100a13       | -0.299 | 0.831 | 0.295 | 0.000105684 | 3 |
| PscA          | 0.328  | 0.843 | 0.441 | 0.000117999 | 3 |
| Tuba1b        | -0.290 | 0.531 | 0.286 | 0.000276617 | 3 |
| Chia1         | 1.074  | 0.594 | 0.029 | 0.0005328   | 3 |
| Spp1          | 1.414  | 0.583 | 0.021 | 0.006682922 | 3 |
| H2afz         | -0.398 | 0.874 | 0.746 | 0.008172169 | 3 |
| Tff1          | 0.359  | 0.996 | 0.863 | 0.017760809 | 3 |
| Ucp2          | 0.340  | 1     | 0.695 | 0.020245245 | 3 |
| mt-Nd3        | -0.416 | 0.882 | 0.734 | 0.08545391  | 3 |
| Ly6e          | -0.728 | 1     | 0.421 | 0.097482797 | 3 |
| Cyr61         | -0.266 | 0.929 | 0.433 | 0.11686184  | 3 |
| Ubd           | -1.600 | 1     | 0.424 | 0.216043445 | 3 |
| Gcnt3         | 0.279  | 0.752 | 0.338 | 0.32653616  | 3 |
| H2-DMA        | -0.619 | 1     | 0.609 | 0.611494407 | 3 |
| Spink4        | -0.552 | 0.957 | 0.472 | 0.660350165 | 3 |
| Krt19         | -0.264 | 1     | 0.761 | 0.729997324 | 3 |
| Cebpb         | -0.335 | 1     | 0.496 | 1           | 3 |
| Clic1         | -0.480 | 0.878 | 0.623 | 1           | 3 |
| Nfe2l2        | -0.324 | 0.756 | 0.531 | 1           | 3 |
| Fabp5         | -0.383 | 0.756 | 0.561 | 1           | 3 |
| Id1           | -0.300 | 1     | 0.502 | 1           | 3 |
| Scgb2b7       | -0.709 | 0.634 | 0.13  | 1           | 3 |
| Neat1         | -0.316 | 0.882 | 0.739 | 1           | 3 |
| 2210407C18Rik | -0.890 | 0.996 | 0.657 | 1           | 3 |



|          |        |       |       |          |   |
|----------|--------|-------|-------|----------|---|
| Atf3     | -0.673 | 0.945 | 0.591 | 1        | 3 |
| Ctse     | -0.587 | 0.98  | 0.621 | 1        | 3 |
| Dusp1    | -0.578 | 0.787 | 0.496 | 1        | 3 |
| Id3      | -0.485 | 1     | 0.673 | 1        | 3 |
| Hes1     | -0.405 | 0.819 | 0.583 | 1        | 3 |
| Lgals2   | 0.346  | 0.858 | 0.624 | 1        | 3 |
| Foxq1    | -0.264 | 0.866 | 0.681 | 1        | 3 |
| Dpcr1    | 0.526  | 0.571 | 0.077 | 1        | 3 |
| H2-DMb1  | -0.706 | 1     | 0.553 | 1        | 3 |
| Sectm1b  | -0.265 | 0.5   | 0.082 | 1        | 3 |
| Dmbt1    | -1.339 | 1     | 0.56  | 1        | 3 |
| Chka     | -0.392 | 0.85  | 0.417 | 1        | 3 |
| Mfge8    | -0.288 | 0.988 | 0.555 | 1        | 3 |
| Gadd45g  | -0.680 | 0.807 | 0.359 | 1        | 3 |
| Csrp1    | -0.308 | 0.811 | 0.398 | 1        | 3 |
| Id2      | -0.495 | 1     | 0.618 | 1        | 3 |
| Muc6     | -0.304 | 1     | 0.771 | 1        | 3 |
| S100a6   | -0.981 | 1     | 0.568 | 1        | 3 |
| Wars     | -0.576 | 1     | 0.543 | 1        | 3 |
| Ifitm3   | -0.682 | 1     | 0.51  | 1        | 3 |
| Nfkbia   | -0.550 | 0.827 | 0.41  | 1        | 3 |
| Rbp2     | 0.302  | 0.634 | 0.302 | 1        | 3 |
| Tmem176b | -0.283 | 0.717 | 0.328 | 1        | 3 |
| Mlph     | -0.353 | 0.634 | 0.232 | 1        | 3 |
| Tcim     | -0.393 | 0.984 | 0.546 | 1        | 3 |
| Il18     | 0.342  | 0.543 | 0.127 | 1        | 3 |
| Pdia2    | -0.296 | 0.756 | 0.407 | 1        | 3 |
| Cckar    | 0.346  | 0.516 | 0.043 | 1        | 3 |
| S100a1   | -0.394 | 0.917 | 0.547 | 1        | 3 |
| Cd59a    | 0.398  | 0.528 | 0.071 | 1        | 3 |
| Reg3g    | -0.354 | 1     | 0.121 | 1.16E-21 | 4 |
| C3       | -0.275 | 0.833 | 0.109 | 2.16E-16 | 4 |
| Iigp1    | -0.333 | 1     | 0.155 | 1.17E-14 | 4 |
| Chit1    | 0.254  | 0.833 | 0.082 | 2.45E-14 | 4 |
| Ly6d     | -0.343 | 0.958 | 0.149 | 4.48E-14 | 4 |
| Capn9    | 0.304  | 1     | 0.202 | 9.21E-12 | 4 |
| Npy      | 0.408  | 0.875 | 0.126 | 2.97E-11 | 4 |
| Gkn3     | -0.386 | 0.958 | 0.159 | 4.13E-11 | 4 |
| Nupr1    | -0.408 | 0.917 | 0.142 | 9.12E-11 | 4 |
| Isg15    | -0.373 | 1     | 0.189 | 6.58E-10 | 4 |
| Wfdc18   | -0.307 | 0.625 | 0.084 | 8.80E-10 | 4 |
| Ifit1bl1 | -0.336 | 0.792 | 0.143 | 5.29E-09 | 4 |
| Ido1     | -0.537 | 1     | 0.197 | 5.89E-09 | 4 |
| Spr2a3   | 1.856  | 1     | 0.993 | 5.24E-08 | 4 |
| Cxcl1    | -0.491 | 0.958 | 0.199 | 1.02E-07 | 4 |
| Clca1    | -0.466 | 1     | 0.226 | 9.36E-07 | 4 |
| Muc6     | -0.654 | 0.958 | 0.22  | 8.34E-06 | 4 |
| Spr2b    | 0.311  | 1     | 0.295 | 1.43E-05 | 4 |
| Muc4     | -0.329 | 0.958 | 0.225 | 1.67E-05 | 4 |
| Itln1    | -0.441 | 0.958 | 0.225 | 2.82E-05 | 4 |

|               |        |       |       |             |   |
|---------------|--------|-------|-------|-------------|---|
| Gbp2          | -0.288 | 1     | 0.24  | 3.54E-05    | 4 |
| Pigr          | -1.116 | 1     | 0.932 | 4.58E-05    | 4 |
| Sftpd         | -0.395 | 0.958 | 0.235 | 0.000108095 | 4 |
| Pclaf         | 0.282  | 0.792 | 0.128 | 0.000155275 | 4 |
| Clca3a2       | -0.400 | 1     | 0.252 | 0.000208664 | 4 |
| Cd74          | -1.060 | 1     | 0.948 | 0.00022972  | 4 |
| Rtp4          | -0.264 | 1     | 0.257 | 0.00051076  | 4 |
| Vamp5         | -0.352 | 1     | 0.266 | 0.001998226 | 4 |
| 9130204L05Rik | 0.302  | 0.833 | 0.192 | 0.002135934 | 4 |
| Ifitm3        | -0.531 | 1     | 0.276 | 0.006462144 | 4 |
| Vsig1         | 0.522  | 1     | 0.927 | 0.006943105 | 4 |
| Plet1         | -0.477 | 1     | 0.281 | 0.011444455 | 4 |
| Ifi47         | -0.275 | 1     | 0.288 | 0.029770125 | 4 |
| Ovol1         | -0.268 | 0.958 | 0.272 | 0.040095822 | 4 |
| Wfdc2         | -1.093 | 0.625 | 0.657 | 0.053509698 | 4 |
| Tnfaip3       | -0.309 | 0.833 | 0.189 | 0.054152971 | 4 |
| Tmed3         | -0.306 | 0.417 | 0.384 | 0.061410497 | 4 |
| Bcas1         | 0.274  | 0.875 | 0.291 | 0.070547145 | 4 |
| Duox2         | -0.425 | 1     | 0.31  | 0.11588513  | 4 |
| Irf1          | -0.364 | 1     | 0.304 | 0.117949479 | 4 |
| Hmgb2         | 0.452  | 1     | 0.439 | 0.123332308 | 4 |
| Gsta1         | 0.475  | 0.875 | 0.337 | 0.217193697 | 4 |
| Lgals2        | 0.546  | 1     | 0.868 | 0.256188272 | 4 |
| Capg          | -0.258 | 0.417 | 0.274 | 0.300891844 | 4 |
| Cela1         | 0.325  | 0.792 | 0.234 | 0.496521949 | 4 |
| Gkn2          | 0.607  | 1     | 0.833 | 0.505791477 | 4 |
| Prdx1         | 0.406  | 1     | 0.989 | 0.509617477 | 4 |
| Gbp2b         | -0.724 | 1     | 0.318 | 0.625988191 | 4 |
| Dmbt1         | -1.084 | 1     | 0.781 | 0.841071607 | 4 |
| Gkn1          | 0.466  | 1     | 0.91  | 1           | 4 |
| H2-Ab1        | -0.869 | 1     | 0.811 | 1           | 4 |
| AW112010      | -1.015 | 1     | 0.884 | 1           | 4 |
| Il33          | 0.343  | 0.792 | 0.248 | 1           | 4 |
| Tubb4b        | 0.330  | 0.958 | 0.569 | 1           | 4 |
| Chil4         | -2.470 | 0.958 | 0.306 | 1           | 4 |
| H2-Eb1        | -0.912 | 1     | 0.749 | 1           | 4 |
| Tff1          | 0.472  | 1     | 0.96  | 1           | 4 |
| Crip1         | 0.303  | 1     | 0.987 | 1           | 4 |
| Cst3          | 0.289  | 1     | 0.764 | 1           | 4 |
| H2-Aa         | -0.843 | 1     | 0.747 | 1           | 4 |
| Gsdmc4        | -0.381 | 1     | 0.344 | 1           | 4 |
| H2-K1         | -0.472 | 1     | 0.947 | 1           | 4 |
| Basp1         | 0.257  | 0.875 | 0.429 | 1           | 4 |
| Me1           | 0.391  | 1     | 0.837 | 1           | 4 |
| Gpx2          | 0.453  | 1     | 0.95  | 1           | 4 |
| Sult1b1       | 0.278  | 0.958 | 0.577 | 1           | 4 |
| Igtp          | -0.494 | 1     | 0.351 | 1           | 4 |
| Anxa10        | 0.313  | 1     | 0.958 | 1           | 4 |
| Clu           | -0.461 | 1     | 0.973 | 1           | 4 |
| Dpcr1         | 0.300  | 0.917 | 0.6   | 1           | 4 |

|          |        |       |       |   |   |
|----------|--------|-------|-------|---|---|
| Agpat2   | 0.332  | 1     | 0.626 | 1 | 4 |
| Duoxa2   | -0.387 | 0.75  | 0.2   | 1 | 4 |
| Cd59a    | 0.435  | 0.625 | 0.092 | 1 | 4 |
| Gsdma2   | 0.332  | 1     | 0.766 | 1 | 4 |
| Slc45a3  | -0.265 | 0.5   | 0.314 | 1 | 4 |
| Psemb8   | -0.641 | 1     | 0.728 | 1 | 4 |
| Lgals4   | 0.434  | 1     | 0.564 | 1 | 4 |
| Cyba     | -0.556 | 1     | 0.748 | 1 | 4 |
| Gstm1    | 0.298  | 0.958 | 0.656 | 1 | 4 |
| Ly6a     | -1.134 | 1     | 0.372 | 1 | 4 |
| Rnf186   | 0.263  | 0.75  | 0.251 | 1 | 4 |
| Ugdh     | 0.265  | 0.958 | 0.682 | 1 | 4 |
| Muc5ac   | 0.259  | 0.75  | 0.27  | 1 | 4 |
| mt-Nd3   | -0.417 | 1     | 0.869 | 1 | 4 |
| Ethe1    | 0.258  | 1     | 0.785 | 1 | 4 |
| Oasl1    | -0.271 | 1     | 0.442 | 1 | 4 |
| Ffar4    | 0.370  | 0.458 | 0.103 | 1 | 4 |
| Ly6e     | -0.566 | 1     | 0.396 | 1 | 4 |
| Dusp1    | 0.320  | 1     | 0.737 | 1 | 4 |
| Bpifb1   | -0.804 | 1     | 0.676 | 1 | 4 |
| Fabp5    | -0.544 | 1     | 0.824 | 1 | 4 |
| Cotl1    | -0.313 | 1     | 0.846 | 1 | 4 |
| AA467197 | 0.354  | 1     | 0.91  | 1 | 4 |
| Maff     | -0.303 | 0.917 | 0.369 | 1 | 4 |
| Ubd      | -1.147 | 1     | 0.41  | 1 | 4 |
| Ppp1r15a | -0.272 | 0.625 | 0.387 | 1 | 4 |
| Bst2     | -0.355 | 1     | 0.43  | 1 | 4 |
| S100a6   | 0.466  | 1     | 0.976 | 1 | 4 |
| S100a1   | -0.312 | 1     | 0.854 | 1 | 4 |
| Mt1      | -0.399 | 1     | 0.958 | 1 | 4 |
| Malat1   | -0.275 | 1     | 0.993 | 1 | 4 |
| H2-DMb1  | -0.409 | 1     | 0.435 | 1 | 4 |
| Lmo4     | 0.338  | 0.917 | 0.656 | 1 | 4 |
| Gm26532  | -0.422 | 0.875 | 0.38  | 1 | 4 |
| Tesc     | -0.264 | 0.833 | 0.661 | 1 | 4 |
| Golm1    | -0.330 | 0.75  | 0.483 | 1 | 4 |
| Mfge8    | -0.271 | 0.75  | 0.544 | 1 | 4 |
| Ifrd1    | -0.453 | 1     | 0.699 | 1 | 4 |
| Phlda1   | -0.300 | 1     | 0.766 | 1 | 4 |
| Rbp2     | -0.443 | 0.875 | 0.643 | 1 | 4 |
| Pglyrp1  | -0.459 | 1     | 0.49  | 1 | 4 |
| Tff2     | -0.601 | 0.958 | 0.846 | 1 | 4 |
| Hmgcs1   | -0.353 | 0.917 | 0.663 | 1 | 4 |
| H2afz    | 0.335  | 1     | 0.913 | 1 | 4 |
| Actb     | 0.367  | 1     | 0.993 | 1 | 4 |
| Aldh3a1  | 0.349  | 0.583 | 0.195 | 1 | 4 |
| Ier3     | -0.497 | 1     | 0.563 | 1 | 4 |
| Tnip3    | -0.301 | 0.542 | 0.177 | 1 | 4 |
| Sprr1a   | -0.958 | 1     | 0.527 | 1 | 4 |
| Gsdmc2   | -0.356 | 1     | 0.637 | 1 | 4 |

|          |        |       |       |             |   |
|----------|--------|-------|-------|-------------|---|
| Hbegf    | -0.480 | 1     | 0.499 | 1           | 4 |
| H2-DMA   | -0.463 | 1     | 0.508 | 1           | 4 |
| Wars     | -0.428 | 1     | 0.616 | 1           | 4 |
| Hes1     | -0.386 | 0.917 | 0.574 | 1           | 4 |
| Pga5     | -0.609 | 0.75  | 0.356 | 1           | 4 |
| Lgals3   | -0.395 | 1     | 0.585 | 1           | 4 |
| Cyr61    | -0.652 | 0.958 | 0.49  | 1           | 4 |
| Prima1   | 0.371  | 0.542 | 0.133 | 1           | 4 |
| Nfkbia   | -0.253 | 1     | 0.651 | 1           | 4 |
| Cyp2s1   | -0.428 | 0.792 | 0.386 | 1           | 4 |
| Krt20    | -0.293 | 0.996 | 0.167 | 3.60E-50    | 5 |
| Cd74     | -0.832 | 1     | 0.97  | 3.14E-47    | 5 |
| Bpifb1   | -0.315 | 1     | 0.212 | 5.67E-37    | 5 |
| Clca1    | -0.734 | 0.998 | 0.219 | 8.40E-36    | 5 |
| AW112010 | -0.860 | 1     | 0.941 | 4.18E-25    | 5 |
| Isg15    | -0.334 | 1     | 0.264 | 1.50E-24    | 5 |
| Duox2    | -0.274 | 0.971 | 0.271 | 1.83E-20    | 5 |
| Gbp2     | -0.253 | 1     | 0.286 | 1.55E-19    | 5 |
| H2-Ab1   | -0.569 | 1     | 0.9   | 1.39E-15    | 5 |
| H2-K1    | -0.465 | 1     | 0.944 | 1.74E-15    | 5 |
| Psmb8    | -0.566 | 1     | 0.833 | 2.30E-15    | 5 |
| Ubd      | -0.442 | 1     | 0.316 | 1.35E-14    | 5 |
| Ly6d     | -0.778 | 0.924 | 0.275 | 1.36E-13    | 5 |
| H2-Aa    | -0.560 | 1     | 0.836 | 1.70E-13    | 5 |
| Cyr61    | -0.258 | 0.981 | 0.338 | 1.77E-12    | 5 |
| Pigr     | -0.614 | 1     | 0.862 | 4.09E-12    | 5 |
| H2-Eb1   | -0.606 | 1     | 0.781 | 6.96E-12    | 5 |
| Crip1    | 0.256  | 0.998 | 0.989 | 5.33E-10    | 5 |
| Fabp5    | -0.383 | 0.998 | 0.933 | 4.59E-09    | 5 |
| Pgc      | 0.266  | 0.973 | 0.699 | 1.42E-08    | 5 |
| Plac8    | -0.275 | 1     | 0.989 | 2.43E-08    | 5 |
| Ifi47    | -0.317 | 1     | 0.353 | 3.40E-08    | 5 |
| Gm11808  | -0.270 | 1     | 0.9   | 3.24E-07    | 5 |
| Hsd17b6  | -0.368 | 1     | 0.368 | 4.89E-07    | 5 |
| Wfdc2    | -0.447 | 0.579 | 0.506 | 5.51E-07    | 5 |
| Gbp2b    | -0.432 | 1     | 0.364 | 6.24E-07    | 5 |
| mt-Nd3   | -0.300 | 0.984 | 0.881 | 0.003714597 | 5 |
| Wars     | -0.427 | 1     | 0.691 | 0.01697681  | 5 |
| Dmbt1    | -0.779 | 1     | 0.669 | 0.038525146 | 5 |
| Aqp3     | -0.261 | 1     | 0.446 | 0.045039121 | 5 |
| Ly6a     | -0.600 | 1     | 0.416 | 0.07641602  | 5 |
| Gm11361  | -0.259 | 1     | 0.777 | 0.680098057 | 5 |
| Sprr1a   | -0.396 | 1     | 0.502 | 0.958314039 | 5 |
| Cyp2c65  | -0.263 | 0.971 | 0.755 | 1           | 5 |
| Mal      | -0.263 | 1     | 0.796 | 1           | 5 |
| Cyba     | -0.279 | 1     | 0.729 | 1           | 5 |
| Clu      | -0.299 | 0.998 | 0.959 | 1           | 5 |
| Gsdmc2   | -0.407 | 1     | 0.654 | 1           | 5 |
| Rep15    | -0.257 | 0.922 | 0.658 | 1           | 5 |
| Ly6e     | -0.353 | 1     | 0.468 | 1           | 5 |

|          |        |       |       |           |   |
|----------|--------|-------|-------|-----------|---|
| Ifi2712b | -0.251 | 1     | 0.569 | 1         | 5 |
| H2-DMA   | -0.349 | 1     | 0.602 | 1         | 5 |
| Igtp     | -0.410 | 1     | 0.506 | 1         | 5 |
| Hspa1a   | -0.265 | 0.959 | 0.558 | 1         | 5 |
| Fabp3    | -0.270 | 0.59  | 0.175 | 1         | 5 |
| Cdkn1a   | -0.271 | 0.994 | 0.628 | 1         | 5 |
| H2-DMb1  | -0.356 | 1     | 0.506 | 1         | 5 |
| Rnase4   | 0.340  | 0.978 | 0.008 | 1.30E-117 | 6 |
| Mcpt1    | -0.258 | 1     | 0.02  | 2.85E-117 | 6 |
| Srgn     | -0.262 | 0.994 | 0.022 | 1.40E-114 | 6 |
| Krt7     | -0.256 | 0.997 | 0.025 | 9.12E-113 | 6 |
| Ikzf2    | -0.260 | 0.997 | 0.034 | 3.53E-109 | 6 |
| Aqp3     | 0.526  | 1     | 0.036 | 4.82E-109 | 6 |
| Cd44     | -0.286 | 0.988 | 0.031 | 5.82E-109 | 6 |
| Cd52     | -0.327 | 0.994 | 0.039 | 1.04E-105 | 6 |
| Ifi47    | -0.261 | 1     | 0.042 | 2.24E-105 | 6 |
| H2-DMb2  | -0.364 | 1     | 0.042 | 2.24E-105 | 6 |
| Rtp4     | -0.359 | 1     | 0.047 | 1.59E-102 | 6 |
| Gm11361  | 0.563  | 0.988 | 0.045 | 2.42E-100 | 6 |
| Chga     | -0.533 | 0.972 | 0.042 | 1.15E-99  | 6 |
| Hs3st1   | -0.322 | 0.994 | 0.05  | 1.32E-98  | 6 |
| Hist1h1c | 0.765  | 0.994 | 0.056 | 5.28E-98  | 6 |
| Epsti1   | -0.335 | 0.985 | 0.045 | 2.95E-97  | 6 |
| Clca3a2  | -0.317 | 0.938 | 0.039 | 5.08E-96  | 6 |
| Fer1l6   | -0.367 | 1     | 0.061 | 1.16E-95  | 6 |
| Igha     | -0.445 | 1     | 0.061 | 1.29E-95  | 6 |
| Clca1    | -0.769 | 0.997 | 0.061 | 4.29E-95  | 6 |
| Sst      | 0.467  | 1     | 0.064 | 4.38E-95  | 6 |
| Tmem176b | -0.278 | 0.948 | 0.034 | 1.13E-94  | 6 |
| Akr1b8   | 0.287  | 0.988 | 0.056 | 4.25E-94  | 6 |
| Gbp2     | -0.528 | 0.991 | 0.061 | 4.67E-94  | 6 |
| Ido1     | -0.601 | 1     | 0.067 | 5.18E-93  | 6 |
| Gsdmc4   | -0.525 | 1     | 0.067 | 5.23E-93  | 6 |
| Ano7     | -0.272 | 0.96  | 0.053 | 2.91E-92  | 6 |
| Irgm1    | -0.452 | 1     | 0.07  | 1.31E-91  | 6 |
| Tmem189  | 0.342  | 1     | 0.081 | 1.97E-88  | 6 |
| Pdlim1   | 0.357  | 0.991 | 0.073 | 2.72E-88  | 6 |
| Gkn3     | -0.533 | 1     | 0.081 | 1.63E-86  | 6 |
| Hmgb2    | -0.367 | 1     | 0.084 | 1.70E-85  | 6 |
| Igkc     | -0.472 | 1     | 0.087 | 6.53E-84  | 6 |
| Degs2    | 0.252  | 0.994 | 0.087 | 7.39E-84  | 6 |
| Chka     | -0.465 | 0.994 | 0.087 | 1.62E-82  | 6 |
| Serpinh1 | 0.271  | 0.92  | 0.022 | 9.53E-81  | 6 |
| Ifitm3   | -0.643 | 1     | 0.095 | 2.05E-80  | 6 |
| Sox9     | -0.553 | 0.988 | 0.087 | 1.72E-79  | 6 |
| Ebf1     | -0.271 | 0.778 | 0.02  | 3.45E-79  | 6 |
| Gsdmc3   | -0.763 | 0.997 | 0.098 | 1.48E-78  | 6 |
| Lbh      | 0.314  | 0.997 | 0.101 | 1.81E-78  | 6 |
| Igtp     | -0.650 | 1     | 0.101 | 8.25E-78  | 6 |
| Gipc2    | 0.393  | 0.994 | 0.103 | 8.74E-78  | 6 |

|           |        |       |       |          |   |
|-----------|--------|-------|-------|----------|---|
| H2-T23    | -0.618 | 1     | 0.112 | 2.73E-73 | 6 |
| Gbp2b     | -0.686 | 1     | 0.112 | 4.09E-73 | 6 |
| Ier3      | -0.366 | 0.978 | 0.095 | 7.66E-73 | 6 |
| Tnfaip3   | -0.291 | 0.763 | 0.031 | 5.49E-72 | 6 |
| Usp50     | 0.580  | 0.123 | 0.006 | 7.91E-72 | 6 |
| Zfp36l2   | -0.344 | 0.997 | 0.115 | 1.59E-71 | 6 |
| Bst2      | -0.603 | 1     | 0.117 | 4.17E-71 | 6 |
| Tinagl1   | -0.255 | 0.129 | 0.061 | 1.42E-70 | 6 |
| Laptm5    | -0.313 | 0.735 | 0.022 | 7.24E-70 | 6 |
| Idi1      | -0.426 | 1     | 0.128 | 1.83E-67 | 6 |
| Fgfbp1    | -0.263 | 0.138 | 0.142 | 1.04E-66 | 6 |
| Hist1h2ap | -0.382 | 0.877 | 0.034 | 1.38E-66 | 6 |
| Cxcr4     | -0.279 | 0.702 | 0.022 | 1.47E-66 | 6 |
| Hist1h1e  | -0.308 | 0.895 | 0.036 | 8.90E-66 | 6 |
| Ly6e      | -0.424 | 1     | 0.131 | 1.87E-65 | 6 |
| Ubd       | -0.406 | 1     | 0.134 | 3.10E-64 | 6 |
| Cxcl17    | 0.445  | 0.951 | 0.103 | 9.51E-64 | 6 |
| Gclc      | -0.445 | 0.96  | 0.103 | 1.52E-63 | 6 |
| Tcim      | -0.466 | 0.154 | 0.128 | 5.98E-63 | 6 |
| S100a14   | 0.328  | 0.892 | 0.05  | 3.29E-61 | 6 |
| Abcc3     | -0.352 | 0.997 | 0.145 | 6.88E-61 | 6 |
| Pam       | 0.770  | 0.154 | 0.02  | 1.47E-60 | 6 |
| Phgr1     | 0.617  | 0.926 | 0.092 | 7.08E-60 | 6 |
| Oxct1     | -0.463 | 0.963 | 0.117 | 1.22E-59 | 6 |
| Atp4a     | -0.388 | 0.988 | 0.14  | 1.33E-59 | 6 |
| H2-DMA    | -0.747 | 1     | 0.148 | 3.58E-59 | 6 |
| Creld2    | -0.314 | 0.908 | 0.07  | 5.09E-59 | 6 |
| Tm4sf5    | 0.312  | 0.16  | 0.025 | 5.41E-59 | 6 |
| Gfpt1     | -0.684 | 1     | 0.151 | 1.98E-58 | 6 |
| Sprr1a    | -0.856 | 1     | 0.156 | 9.61E-57 | 6 |
| Hist1h2bc | 0.510  | 0.169 | 0.047 | 1.38E-55 | 6 |
| Ethe1     | 0.519  | 0.988 | 0.168 | 3.44E-55 | 6 |
| Hspa1a    | -0.804 | 0.994 | 0.176 | 8.12E-49 | 6 |
| Wars      | -1.025 | 1     | 0.182 | 1.01E-47 | 6 |
| Psmb8     | -0.797 | 1     | 0.184 | 6.17E-47 | 6 |
| Muc6      | -0.939 | 1     | 0.19  | 2.95E-45 | 6 |
| Rnf186    | 0.344  | 0.834 | 0.042 | 1.12E-44 | 6 |
| Ugdh      | 0.556  | 0.951 | 0.19  | 1.55E-42 | 6 |
| Sgk1      | 0.430  | 0.212 | 0.034 | 2.19E-42 | 6 |
| Cst3      | -0.514 | 0.243 | 0.237 | 1.75E-41 | 6 |
| Shh       | -0.262 | 0.84  | 0.059 | 2.09E-41 | 6 |
| Dmbt1     | -1.075 | 1     | 0.207 | 5.98E-40 | 6 |
| Id1       | -0.314 | 1     | 0.218 | 6.09E-40 | 6 |
| Arl6ip1   | -0.301 | 0.246 | 0.115 | 6.98E-37 | 6 |
| Clic6     | -0.488 | 0.846 | 0.084 | 1.17E-36 | 6 |
| Smim6     | 0.564  | 0.969 | 0.26  | 7.73E-36 | 6 |
| Zfp36     | -0.408 | 0.988 | 0.223 | 1.03E-35 | 6 |
| Cebpb     | -0.391 | 0.874 | 0.12  | 4.91E-35 | 6 |
| Gkn1      | 0.538  | 1     | 0.975 | 5.47E-35 | 6 |
| Nr4a1     | -0.556 | 0.815 | 0.061 | 1.64E-34 | 6 |

|               |        |       |       |          |   |
|---------------|--------|-------|-------|----------|---|
| Tff1          | 0.400  | 1     | 1     | 5.95E-33 | 6 |
| Esrrg         | -0.258 | 0.446 | 0.022 | 7.02E-33 | 6 |
| Tkt           | -0.455 | 0.286 | 0.24  | 1.43E-32 | 6 |
| Sfn           | -0.514 | 0.911 | 0.168 | 4.62E-32 | 6 |
| Ifrd1         | -0.444 | 0.892 | 0.154 | 1.71E-31 | 6 |
| Gkn2          | 0.520  | 1     | 0.936 | 2.31E-30 | 6 |
| Prr13         | 0.603  | 1     | 0.318 | 2.98E-30 | 6 |
| Cd59a         | 0.760  | 0.258 | 0.05  | 9.07E-30 | 6 |
| Mgst2         | 0.415  | 0.898 | 0.196 | 9.45E-30 | 6 |
| Clic1         | 0.696  | 1     | 0.338 | 1.58E-28 | 6 |
| Sult1d1       | 0.257  | 0.277 | 0.142 | 3.61E-28 | 6 |
| Ifi27         | -0.509 | 0.815 | 0.089 | 5.70E-28 | 6 |
| Atp4b         | -0.483 | 0.877 | 0.156 | 9.60E-28 | 6 |
| Gcnt3         | 0.275  | 0.862 | 0.162 | 1.12E-26 | 6 |
| Hspa1b        | -1.449 | 1     | 0.26  | 7.36E-26 | 6 |
| Hmgcs1        | -0.369 | 0.997 | 0.271 | 8.97E-26 | 6 |
| Ctse          | 0.775  | 1     | 0.388 | 1.67E-25 | 6 |
| Gsdmc2        | -0.934 | 1     | 0.265 | 3.87E-25 | 6 |
| Bpifb1        | -1.407 | 1     | 0.268 | 8.26E-24 | 6 |
| Far1          | -0.276 | 0.988 | 0.285 | 1.13E-23 | 6 |
| Cpn1          | -0.291 | 0.637 | 0.022 | 5.65E-23 | 6 |
| Cd74          | -1.220 | 1     | 0.751 | 4.00E-22 | 6 |
| Cd79a         | -0.291 | 0.332 | 0.025 | 1.68E-21 | 6 |
| 1810010D01Rik | -0.598 | 0.794 | 0.109 | 4.22E-20 | 6 |
| Pigr          | -0.869 | 1     | 0.291 | 7.63E-20 | 6 |
| Lypd8         | 0.748  | 0.997 | 0.497 | 1.40E-19 | 6 |
| Lgr4          | 0.569  | 0.314 | 0.095 | 2.75E-19 | 6 |
| Gstm1         | -0.278 | 0.372 | 0.288 | 4.99E-19 | 6 |
| Gm26917       | -0.798 | 1     | 0.302 | 5.72E-19 | 6 |
| Rpl17         | 0.538  | 0.975 | 0.45  | 7.50E-18 | 6 |
| Gm3776        | 0.391  | 0.858 | 0.237 | 1.08E-17 | 6 |
| Crip1         | 0.663  | 0.988 | 0.704 | 3.72E-17 | 6 |
| Gstp1         | -0.421 | 0.425 | 0.385 | 5.34E-17 | 6 |
| Gif           | -0.365 | 0.994 | 0.327 | 9.82E-17 | 6 |
| Chia1         | -0.429 | 0.434 | 0.388 | 2.91E-16 | 6 |
| Ly6a          | -1.306 | 1     | 0.307 | 4.29E-16 | 6 |
| Ucp2          | 0.792  | 1     | 0.483 | 6.62E-16 | 6 |
| H2-Eb1        | -1.056 | 1     | 0.31  | 1.16E-15 | 6 |
| Atp5k         | 0.585  | 1     | 0.453 | 5.43E-15 | 6 |
| Krt19         | 0.529  | 0.997 | 0.757 | 7.02E-14 | 6 |
| Gm42418       | 0.577  | 1     | 0.88  | 9.14E-14 | 6 |
| Dusp1         | -0.644 | 0.806 | 0.165 | 1.49E-13 | 6 |
| Clps          | -0.424 | 0.988 | 0.894 | 3.06E-13 | 6 |
| Muc5ac        | -1.107 | 0.594 | 0.514 | 3.96E-13 | 6 |
| Vsig1         | -0.490 | 0.495 | 0.447 | 5.94E-13 | 6 |
| AY036118      | -0.731 | 1     | 0.718 | 2.53E-11 | 6 |
| Gsta4         | 0.486  | 0.898 | 0.668 | 2.66E-10 | 6 |
| S100a11       | 0.611  | 1     | 0.525 | 2.98E-10 | 6 |
| Oit1          | -0.270 | 0.44  | 0.293 | 3.43E-10 | 6 |
| Wfdc2         | -0.335 | 0.397 | 0.145 | 8.48E-10 | 6 |

|               |        |       |       |             |   |
|---------------|--------|-------|-------|-------------|---|
| Rps2          | 0.551  | 0.868 | 0.385 | 1.22E-09    | 6 |
| Npy           | 0.258  | 0.655 | 0.02  | 7.11E-09    | 6 |
| Lars2         | -1.173 | 1     | 0.366 | 2.47E-07    | 6 |
| Krt8          | 0.467  | 1     | 0.835 | 2.26E-06    | 6 |
| H2-Ab1        | -0.483 | 1     | 0.385 | 9.42E-06    | 6 |
| Gm10260       | 0.664  | 0.406 | 0.117 | 1.23E-05    | 6 |
| Rps29         | 0.411  | 1     | 0.913 | 2.12E-05    | 6 |
| Lgals2        | 0.255  | 0.972 | 0.754 | 2.70E-05    | 6 |
| Mpeg1         | -0.253 | 0.145 | 0.025 | 7.61E-05    | 6 |
| Cym           | -1.541 | 1     | 0.385 | 9.10E-05    | 6 |
| Il33          | 0.461  | 0.655 | 0.073 | 0.000110799 | 6 |
| S100a6        | 0.840  | 1     | 0.788 | 0.000128267 | 6 |
| H2-Aa         | -1.444 | 1     | 0.385 | 0.000161873 | 6 |
| 9130204L05Rik | 0.768  | 0.622 | 0.022 | 0.000241247 | 6 |
| Nme2          | -0.861 | 0.88  | 0.316 | 0.000245966 | 6 |
| Neat1         | -0.998 | 1     | 0.416 | 0.001727147 | 6 |
| Clu           | 0.365  | 1     | 0.606 | 0.002423193 | 6 |
| Mef2c         | -0.253 | 0.105 | 0.02  | 0.010492168 | 6 |
| Rpl9-ps6      | -0.529 | 1     | 0.433 | 0.017522025 | 6 |
| Gjb1          | 0.299  | 0.437 | 0.075 | 0.027592898 | 6 |
| 2210407C18Rik | 0.251  | 1     | 0.925 | 0.039197353 | 6 |
| Mt1           | -0.442 | 0.751 | 0.575 | 0.078640306 | 6 |
| Basp1         | -0.328 | 0.625 | 0.089 | 1           | 6 |
| AW112010      | -0.660 | 1     | 0.441 | 1           | 6 |
| Sdcbp2        | 0.280  | 0.483 | 0.131 | 1           | 6 |
| Ckmt1         | 0.347  | 0.52  | 0.237 | 1           | 6 |
| Abhd2         | 0.506  | 0.48  | 0.092 | 1           | 6 |
| Tff2          | -0.441 | 0.865 | 0.807 | 1           | 6 |
| Aldh3a1       | 0.606  | 0.489 | 0.109 | 1           | 6 |
| Plip          | 0.387  | 0.625 | 0.154 | 1           | 6 |
| H2-K1         | -0.952 | 1     | 0.57  | 1           | 6 |
| Tst           | 0.271  | 0.52  | 0.156 | 1           | 6 |
| Nqo1          | 0.674  | 0.523 | 0.212 | 1           | 6 |
| Spr2a3        | 0.964  | 1     | 0.83  | 1           | 6 |
| Nfkbia        | -0.353 | 0.52  | 0.092 | 1           | 6 |
| Ly6c1         | -0.259 | 0.498 | 0.034 | 1           | 6 |
| Spdef         | -0.265 | 0.526 | 0.031 | 1           | 6 |
| Rbp2          | 0.613  | 0.554 | 0.162 | 1           | 6 |
| Chad          | 0.583  | 1     | 0.008 | 1.22E-126   | 7 |
| Cdkn2a        | 0.945  | 1     | 0.009 | 3.74E-123   | 7 |
| Il1rn         | 0.840  | 1     | 0.009 | 4.74E-123   | 7 |
| 2210404E10Rik | 0.664  | 1     | 0.011 | 1.06E-119   | 7 |
| Tmed6         | 0.790  | 1     | 0.012 | 1.18E-116   | 7 |
| Racgap1       | 0.566  | 1     | 0.014 | 1.59E-113   | 7 |
| Csf2ra        | 0.668  | 1     | 0.014 | 1.98E-113   | 7 |
| Klre1         | 1.000  | 0.921 | 0.009 | 1.93E-111   | 7 |
| Slc15a3       | 0.613  | 1     | 0.019 | 4.69E-105   | 7 |
| Tuba1a        | 0.691  | 1     | 0.02  | 1.73E-102   | 7 |
| Prf1          | 0.486  | 0.921 | 0.014 | 4.14E-102   | 7 |
| Bcr           | 0.476  | 1     | 0.025 | 2.50E-95    | 7 |



|            |        |       |       |          |   |
|------------|--------|-------|-------|----------|---|
| Lyz2       | -0.310 | 1     | 0.025 | 3.80E-95 | 7 |
| Tnf        | 0.756  | 1     | 0.026 | 1.34E-93 | 7 |
| Emp1       | 0.758  | 1     | 0.026 | 1.56E-93 | 7 |
| Asf1b      | 0.379  | 0.684 | 0.003 | 4.63E-90 | 7 |
| Sox9       | 0.372  | 1     | 0.029 | 9.41E-89 | 7 |
| Cox7a1     | 0.267  | 1     | 0.029 | 1.09E-88 | 7 |
| Rrad       | 0.950  | 0.974 | 0.023 | 1.78E-87 | 7 |
| Spp1       | -0.327 | 0.974 | 0.023 | 4.32E-87 | 7 |
| Gbp2b      | -0.306 | 1     | 0.033 | 9.41E-85 | 7 |
| Cd72       | 0.535  | 1     | 0.036 | 1.26E-81 | 7 |
| Csf1       | 1.000  | 1     | 0.036 | 1.54E-81 | 7 |
| Serpinb1a  | 0.435  | 1     | 0.036 | 1.95E-81 | 7 |
| Ccl3       | 0.892  | 0.921 | 0.028 | 4.34E-81 | 7 |
| Eomes      | -0.390 | 0.974 | 0.034 | 1.41E-79 | 7 |
| Top2a      | -0.345 | 1     | 0.037 | 2.44E-79 | 7 |
| Fdps       | 0.328  | 1     | 0.039 | 4.44E-78 | 7 |
| Slfn5      | -0.309 | 0.974 | 0.031 | 2.28E-77 | 7 |
| Il12rb2    | 0.700  | 0.105 | 0.003 | 1.55E-75 | 7 |
| Mcm6       | 0.517  | 1     | 0.042 | 1.29E-74 | 7 |
| Msmo1      | 0.502  | 1     | 0.043 | 4.95E-73 | 7 |
| Glpr1      | 0.581  | 1     | 0.045 | 3.55E-72 | 7 |
| Il13       | 0.842  | 0.105 | 0.017 | 7.08E-72 | 7 |
| Idi1       | -0.305 | 1     | 0.045 | 1.92E-71 | 7 |
| Mgst2      | -0.290 | 1     | 0.047 | 6.50E-70 | 7 |
| Gzma       | -0.433 | 0.711 | 0.016 | 9.45E-70 | 7 |
| Bmp2       | 0.484  | 0.132 | 0.012 | 2.97E-66 | 7 |
| Ckb        | 1.469  | 1     | 0.057 | 1.52E-64 | 7 |
| Cks2       | 0.278  | 1     | 0.053 | 1.62E-64 | 7 |
| Igkv15-103 | -0.262 | 0.684 | 0.017 | 6.15E-64 | 7 |
| Irf8       | 0.732  | 1     | 0.056 | 6.10E-63 | 7 |
| Gbp7       | 0.418  | 1     | 0.056 | 1.11E-62 | 7 |
| Calca      | 0.513  | 0.132 | 0.017 | 1.16E-62 | 7 |
| Axl        | 0.460  | 1     | 0.056 | 4.25E-62 | 7 |
| Kctd12     | -0.277 | 0.105 | 0.031 | 7.12E-62 | 7 |
| Gclc       | 0.482  | 1     | 0.057 | 2.28E-61 | 7 |
| Golm1      | -0.289 | 0.105 | 0.033 | 5.36E-61 | 7 |
| Iigp1      | -0.401 | 0.974 | 0.048 | 5.78E-61 | 7 |
| Hells      | -0.272 | 0.921 | 0.042 | 2.42E-60 | 7 |
| Ubd        | -0.501 | 1     | 0.059 | 1.08E-59 | 7 |
| Lmnb1      | 0.572  | 1     | 0.06  | 2.45E-59 | 7 |
| Plac8      | -0.339 | 1     | 0.06  | 1.04E-58 | 7 |
| Cd83       | 0.673  | 1     | 0.062 | 2.77E-58 | 7 |
| Ccr2       | 0.693  | 1     | 0.064 | 7.38E-58 | 7 |
| Ly6c2      | 0.696  | 0.605 | 0.017 | 5.20E-54 | 7 |
| Bst2       | 0.507  | 1     | 0.07  | 1.20E-53 | 7 |
| Ctss       | -0.299 | 1     | 0.068 | 2.39E-53 | 7 |
| Cst7       | 1.107  | 1     | 0.074 | 7.84E-53 | 7 |
| Podnl1     | 1.365  | 1     | 0.076 | 2.22E-52 | 7 |
| Klf4       | 0.979  | 1     | 0.071 | 4.09E-52 | 7 |
| Clic6      | -0.606 | 0.105 | 0.051 | 5.94E-52 | 7 |

|           |        |       |       |          |   |
|-----------|--------|-------|-------|----------|---|
| Icam1     | 0.424  | 1     | 0.073 | 2.83E-51 | 7 |
| F2r       | 0.850  | 0.895 | 0.034 | 3.92E-51 | 7 |
| Ncf4      | 0.278  | 0.947 | 0.068 | 1.94E-49 | 7 |
| Ptch1     | -0.369 | 0.842 | 0.045 | 2.31E-49 | 7 |
| Ccl4      | 1.473  | 0.921 | 0.053 | 2.82E-49 | 7 |
| Lyar      | 0.318  | 0.921 | 0.047 | 3.97E-49 | 7 |
| Sox4      | -0.379 | 1     | 0.076 | 7.78E-49 | 7 |
| Klrc1     | 0.585  | 0.658 | 0.028 | 1.97E-48 | 7 |
| Lgals2    | -1.038 | 0.026 | 0.121 | 2.67E-48 | 7 |
| Tnni3     | -0.448 | 0.158 | 0.029 | 1.69E-47 | 7 |
| Phlda1    | 0.620  | 1     | 0.081 | 2.12E-47 | 7 |
| Ube2s     | 0.479  | 1     | 0.084 | 5.87E-46 | 7 |
| Trdc      | 0.257  | 0.789 | 0.05  | 2.32E-45 | 7 |
| Gpm6b     | -0.355 | 0.868 | 0.043 | 5.89E-45 | 7 |
| Anxa2     | 1.150  | 0.947 | 0.07  | 6.39E-44 | 7 |
| Pigr      | -0.763 | 1     | 0.087 | 4.04E-43 | 7 |
| Nrgn      | -0.411 | 0.105 | 0.054 | 5.36E-43 | 7 |
| Ifi47     | -0.250 | 0.947 | 0.067 | 1.15E-42 | 7 |
| Itm2a     | -0.485 | 0.947 | 0.079 | 1.82E-42 | 7 |
| Cyth4     | 0.565  | 1     | 0.091 | 2.11E-42 | 7 |
| Rgs16     | 0.969  | 1     | 0.095 | 3.12E-41 | 7 |
| Lrpprc    | -0.411 | 0.158 | 0.047 | 7.75E-41 | 7 |
| Igha      | -1.000 | 1     | 0.093 | 2.82E-40 | 7 |
| Gimap7    | 0.823  | 1     | 0.101 | 6.86E-40 | 7 |
| Tigit     | 0.927  | 1     | 0.101 | 4.14E-39 | 7 |
| Krt19     | -0.473 | 1     | 0.098 | 1.90E-38 | 7 |
| Rflnb     | -0.439 | 0.158 | 0.056 | 3.92E-38 | 7 |
| Spink4    | -0.426 | 0.158 | 0.057 | 1.04E-37 | 7 |
| Il1rl1    | -0.532 | 0.158 | 0.057 | 1.18E-37 | 7 |
| Atp4a     | -1.083 | 0.079 | 0.13  | 2.66E-37 | 7 |
| Klrd1     | -0.268 | 0.132 | 0.059 | 8.05E-36 | 7 |
| Il2ra     | 1.546  | 1     | 0.121 | 3.35E-35 | 7 |
| Csf2      | 0.748  | 0.237 | 0.009 | 8.52E-35 | 7 |
| Tmem176a  | 1.656  | 0.816 | 0.029 | 8.76E-35 | 7 |
| Mxd1      | 0.897  | 0.974 | 0.101 | 2.07E-34 | 7 |
| Oxct1     | -0.685 | 0.132 | 0.096 | 2.22E-34 | 7 |
| AA467197  | 0.348  | 0.211 | 0.028 | 2.52E-34 | 7 |
| H2-Eb1    | -0.707 | 1     | 0.109 | 4.15E-34 | 7 |
| Fabp5     | -0.539 | 0.132 | 0.098 | 5.50E-34 | 7 |
| Gfpt1     | -0.636 | 1     | 0.11  | 1.39E-33 | 7 |
| Ptpn7     | 0.697  | 1     | 0.119 | 7.35E-33 | 7 |
| Esd       | 0.617  | 1     | 0.124 | 1.09E-31 | 7 |
| Pde4b     | 1.558  | 1     | 0.14  | 1.23E-31 | 7 |
| S100a1    | -0.514 | 0.868 | 0.056 | 1.90E-31 | 7 |
| Serpina3i | 0.690  | 0.316 | 0.006 | 5.22E-31 | 7 |
| Gkn3      | -0.336 | 1     | 0.118 | 6.10E-31 | 7 |
| Capg      | 1.858  | 1     | 0.155 | 4.30E-30 | 7 |
| Bpifb1    | -0.339 | 1     | 0.121 | 5.66E-30 | 7 |
| Far1      | -0.498 | 1     | 0.122 | 1.57E-29 | 7 |
| Heg1      | -0.258 | 0.184 | 0.042 | 3.15E-29 | 7 |

|               |        |       |       |          |   |
|---------------|--------|-------|-------|----------|---|
| Xcl1          | -0.506 | 0.158 | 0.065 | 3.52E-29 | 7 |
| Bcl2a1b       | 0.833  | 1     | 0.136 | 8.11E-29 | 7 |
| Irf1          | -0.331 | 0.158 | 0.107 | 3.66E-28 | 7 |
| Ccl5          | 2.822  | 1     | 0.146 | 7.98E-28 | 7 |
| S1pr1         | -0.763 | 0.974 | 0.116 | 1.47E-27 | 7 |
| Atp2a3        | -0.420 | 0.184 | 0.084 | 1.64E-27 | 7 |
| Marcks1       | -0.337 | 0.816 | 0.043 | 1.65E-26 | 7 |
| Igkc          | -0.591 | 1     | 0.133 | 2.30E-26 | 7 |
| Kcnj16        | -0.259 | 0.263 | 0.016 | 3.64E-26 | 7 |
| Ncr1          | 0.433  | 0.211 | 0.033 | 7.06E-26 | 7 |
| Lef1          | -0.790 | 0.158 | 0.135 | 1.59E-25 | 7 |
| Tubb5         | 1.197  | 1     | 0.166 | 1.81E-25 | 7 |
| Runx3         | 0.546  | 1     | 0.149 | 6.46E-25 | 7 |
| H2-Ab1        | -0.702 | 1     | 0.14  | 9.10E-25 | 7 |
| Vim           | 1.539  | 0.974 | 0.181 | 1.08E-23 | 7 |
| Ccr7          | -0.836 | 0.947 | 0.126 | 1.71E-23 | 7 |
| Selplg        | 1.474  | 1     | 0.22  | 1.21E-22 | 7 |
| Nr4a3         | 0.846  | 0.974 | 0.149 | 2.32E-22 | 7 |
| Klf2          | -0.279 | 0.974 | 0.141 | 4.52E-22 | 7 |
| Clic1         | 1.467  | 1     | 0.236 | 5.44E-22 | 7 |
| Sell          | -0.600 | 0.947 | 0.126 | 6.21E-22 | 7 |
| Cxcr6         | 1.173  | 0.868 | 0.093 | 6.97E-22 | 7 |
| S100a4        | 1.245  | 0.921 | 0.14  | 1.86E-21 | 7 |
| Tcrg-V6       | 1.297  | 0.158 | 0     | 8.46E-21 | 7 |
| Samsn1        | 0.583  | 1     | 0.175 | 1.26E-20 | 7 |
| Ly6e          | 0.700  | 0.947 | 0.143 | 1.65E-20 | 7 |
| Hamp2         | -0.723 | 0.237 | 0.076 | 1.79E-20 | 7 |
| Limd2         | 1.472  | 1     | 0.27  | 1.87E-20 | 7 |
| Gimap6        | 1.301  | 1     | 0.211 | 2.02E-20 | 7 |
| Sla           | 0.870  | 1     | 0.189 | 3.68E-20 | 7 |
| Arhgdib       | 2.069  | 1     | 0.299 | 4.01E-20 | 7 |
| S100a11       | 1.355  | 1     | 0.226 | 7.22E-20 | 7 |
| Cd247         | 0.971  | 1     | 0.184 | 8.05E-20 | 7 |
| Nkg7          | 1.063  | 0.921 | 0.163 | 1.07E-19 | 7 |
| Fcer1g        | 0.532  | 0.263 | 0.034 | 1.23E-19 | 7 |
| Hspa1b        | 0.353  | 1     | 0.184 | 1.28E-18 | 7 |
| Tgfb1         | 0.671  | 0.974 | 0.174 | 1.60E-18 | 7 |
| S100a6        | 2.068  | 1     | 0.309 | 2.85E-18 | 7 |
| Gpx2          | -0.424 | 0.263 | 0.06  | 3.04E-18 | 7 |
| Ctse          | -0.299 | 0.237 | 0.099 | 4.53E-18 | 7 |
| Lgals9        | 0.350  | 0.895 | 0.122 | 8.31E-18 | 7 |
| Furin         | -0.549 | 0.237 | 0.105 | 9.21E-18 | 7 |
| Gem           | 0.881  | 0.263 | 0.057 | 9.24E-18 | 7 |
| Tyrobp        | 0.618  | 0.263 | 0.05  | 2.79E-17 | 7 |
| 1810010D01Rik | -0.602 | 0.237 | 0.116 | 3.25E-17 | 7 |
| Hilpda        | -0.558 | 0.263 | 0.073 | 6.69E-17 | 7 |
| Klrg1         | -0.406 | 0.289 | 0.039 | 1.15E-16 | 7 |
| Cd6           | -0.404 | 0.947 | 0.169 | 1.29E-16 | 7 |
| Sst           | -0.587 | 0.816 | 0.076 | 2.06E-16 | 7 |
| Cytip         | 1.010  | 1     | 0.242 | 2.65E-16 | 7 |

|           |        |       |       |          |   |
|-----------|--------|-------|-------|----------|---|
| Prr13     | 0.861  | 0.974 | 0.214 | 6.95E-16 | 7 |
| Epsti1    | -0.259 | 0.289 | 0.051 | 2.55E-15 | 7 |
| mt-Nd3    | -0.555 | 1     | 0.191 | 8.31E-15 | 7 |
| S100a10   | 1.259  | 1     | 0.335 | 2.16E-14 | 7 |
| Tbc1d4    | -0.846 | 1     | 0.194 | 2.47E-14 | 7 |
| Lgals1    | 1.786  | 0.947 | 0.27  | 4.32E-14 | 7 |
| Thy1      | 0.339  | 0.947 | 0.183 | 5.45E-14 | 7 |
| Trp53i11  | 0.346  | 0.316 | 0.025 | 5.54E-14 | 7 |
| Crip1     | 1.750  | 1     | 0.344 | 1.12E-13 | 7 |
| Igtp      | -0.524 | 0.289 | 0.073 | 1.16E-13 | 7 |
| Gstm1     | -0.336 | 0.316 | 0.037 | 7.30E-13 | 7 |
| Tnfrsf4   | -0.334 | 1     | 0.211 | 1.91E-12 | 7 |
| Ccr8      | 0.262  | 0.289 | 0.082 | 2.38E-12 | 7 |
| Krt83     | 0.766  | 0.237 | 0.016 | 3.15E-12 | 7 |
| Trp53inp1 | -0.384 | 1     | 0.211 | 3.49E-12 | 7 |
| Tcf7      | -0.544 | 1     | 0.216 | 8.02E-12 | 7 |
| Smc4      | -0.543 | 0.974 | 0.209 | 9.60E-12 | 7 |
| Irf4      | -0.421 | 0.289 | 0.081 | 9.86E-12 | 7 |
| Rac2      | 1.181  | 1     | 0.474 | 9.91E-12 | 7 |
| Gimap1    | 0.289  | 0.921 | 0.18  | 1.45E-11 | 7 |
| Ctla4     | 0.848  | 1     | 0.24  | 1.73E-11 | 7 |
| Prelid2   | 0.255  | 0.737 | 0.054 | 2.08E-11 | 7 |
| Cxcr4     | -0.422 | 1     | 0.222 | 3.81E-11 | 7 |
| Ly6a      | -1.113 | 0.289 | 0.143 | 4.98E-11 | 7 |
| Tagln2    | 0.996  | 0.921 | 0.24  | 8.21E-11 | 7 |
| Ly6g5b    | 0.577  | 0.158 | 0.006 | 8.73E-11 | 7 |
| Mllt3     | -0.653 | 0.289 | 0.143 | 9.70E-11 | 7 |
| Lck       | 1.691  | 1     | 0.349 | 1.91E-10 | 7 |
| Rgs2      | -0.541 | 0.289 | 0.149 | 2.08E-10 | 7 |
| Fxyd5     | 1.145  | 0.974 | 0.374 | 2.14E-10 | 7 |
| Maf       | 0.461  | 1     | 0.256 | 3.82E-10 | 7 |
| Muc6      | -0.657 | 1     | 0.225 | 4.36E-10 | 7 |
| Lag3      | -0.581 | 1     | 0.228 | 4.73E-10 | 7 |
| Actb      | 1.310  | 1     | 0.876 | 6.28E-10 | 7 |
| Car2      | -0.931 | 0.289 | 0.209 | 6.92E-10 | 7 |
| Itk       | -0.409 | 0.289 | 0.172 | 7.02E-10 | 7 |
| Anxa1     | 0.394  | 0.605 | 0.006 | 7.83E-10 | 7 |
| Slamf6    | -1.039 | 0.974 | 0.223 | 2.21E-09 | 7 |
| Nme2      | 0.990  | 0.947 | 0.333 | 3.23E-09 | 7 |
| Dut       | -0.438 | 0.316 | 0.118 | 5.22E-09 | 7 |
| Tff2      | -1.528 | 0.316 | 0.42  | 6.35E-09 | 7 |
| Ucp2      | 0.953  | 1     | 0.468 | 1.10E-08 | 7 |
| Gm3839    | 0.522  | 0.342 | 0.04  | 1.34E-08 | 7 |
| Tcrg-C1   | 0.846  | 0.342 | 0.025 | 2.55E-08 | 7 |
| Srgn      | 0.882  | 1     | 0.448 | 2.56E-08 | 7 |
| Id2       | 0.324  | 1     | 0.291 | 2.60E-08 | 7 |
| Arl6ip1   | 0.816  | 1     | 0.322 | 4.09E-08 | 7 |
| Dusp5     | -0.565 | 0.316 | 0.164 | 4.33E-08 | 7 |
| Clps      | -0.955 | 1     | 0.964 | 6.08E-08 | 7 |
| Lbh       | 0.401  | 1     | 0.282 | 7.65E-08 | 7 |

|               |        |       |       |             |   |
|---------------|--------|-------|-------|-------------|---|
| Mt1           | -0.411 | 0.316 | 0.177 | 8.04E-08    | 7 |
| Cd163l1       | 1.062  | 0.132 | 0.006 | 9.19E-08    | 7 |
| Coro1a        | 0.955  | 1     | 0.496 | 1.20E-07    | 7 |
| Gm11808       | -0.306 | 0.737 | 0.076 | 1.45E-07    | 7 |
| Gsta4         | -0.427 | 0.342 | 0.09  | 2.11E-07    | 7 |
| Sit1          | 0.736  | 0.184 | 0.016 | 2.12E-07    | 7 |
| Socs1         | -0.352 | 0.342 | 0.088 | 2.43E-07    | 7 |
| Il2rb         | 0.778  | 1     | 0.329 | 3.20E-07    | 7 |
| Rhoh          | -0.547 | 0.316 | 0.177 | 3.78E-07    | 7 |
| Mgst3         | -0.756 | 0.342 | 0.115 | 5.22E-07    | 7 |
| Hist1h2ap     | -0.284 | 0.368 | 0.026 | 1.08E-06    | 7 |
| Msn           | 0.467  | 1     | 0.327 | 1.30E-06    | 7 |
| Bin2          | 0.476  | 0.763 | 0.113 | 1.46E-06    | 7 |
| Krt8          | -0.828 | 0.342 | 0.18  | 1.61E-06    | 7 |
| 1810011H11Rik | 0.368  | 0.132 | 0.008 | 1.71E-06    | 7 |
| Trgv2         | 0.647  | 0.105 | 0.005 | 4.15E-06    | 7 |
| Cd53          | 0.250  | 1     | 0.313 | 9.08E-06    | 7 |
| 2210407C18Rik | -0.348 | 1     | 0.288 | 1.54E-05    | 7 |
| Cym           | -0.837 | 1     | 0.273 | 1.91E-05    | 7 |
| Gif           | -0.736 | 0.974 | 0.267 | 3.75E-05    | 7 |
| Klk8          | 0.515  | 0.368 | 0.057 | 4.44E-05    | 7 |
| Cd3d          | 0.694  | 1     | 0.397 | 7.44E-05    | 7 |
| Gata3         | -0.317 | 0.368 | 0.147 | 0.000141199 | 7 |
| Trac          | 0.479  | 1     | 0.346 | 0.000163399 | 7 |
| Fgl2          | 0.455  | 0.684 | 0.065 | 0.000209182 | 7 |
| Apbb1ip       | 0.767  | 0.684 | 0.084 | 0.000290197 | 7 |
| Gm10260       | 0.614  | 0.842 | 0.233 | 0.000360056 | 7 |
| Lrmp          | -0.419 | 0.368 | 0.102 | 0.000494554 | 7 |
| Cnn2          | 0.681  | 0.842 | 0.251 | 0.000536779 | 7 |
| Agl           | 0.289  | 0.237 | 0.005 | 0.001422053 | 7 |
| Pla2g1b       | -0.712 | 1     | 0.964 | 0.002805168 | 7 |
| Laptm5        | 0.689  | 0.974 | 0.521 | 0.003172286 | 7 |
| Ltb           | 0.792  | 0.868 | 0.394 | 0.004239526 | 7 |
| Sprr2a3       | -1.323 | 1     | 0.309 | 0.004989455 | 7 |
| Tnfaip3       | -0.755 | 0.421 | 0.29  | 0.007177049 | 7 |
| Trbc1         | -0.545 | 1     | 0.332 | 0.017949666 | 7 |
| Ddit4         | 0.294  | 0.684 | 0.09  | 0.022690355 | 7 |
| Ifi27l2a      | -0.465 | 1     | 0.344 | 0.023215852 | 7 |
| Apoa1         | -0.780 | 0.421 | 0.155 | 0.053764261 | 7 |
| AY036118      | 0.657  | 1     | 0.586 | 0.054891381 | 7 |
| Cd28          | -0.556 | 1     | 0.344 | 0.068970116 | 7 |
| Cd3g          | 0.482  | 0.921 | 0.369 | 0.087325923 | 7 |
| Ifi203        | -0.630 | 0.5   | 0.14  | 0.109534187 | 7 |
| Cd37          | 0.755  | 0.711 | 0.157 | 0.18934408  | 7 |
| Ighm          | -0.347 | 0.711 | 0.129 | 0.290250955 | 7 |
| Lta           | 0.481  | 0.105 | 0.016 | 0.297155465 | 7 |
| Utf1          | 0.365  | 0.105 | 0.016 | 0.314102168 | 7 |
| Atp4b         | -0.488 | 0.447 | 0.214 | 0.424611504 | 7 |
| Lgals3        | 0.957  | 0.579 | 0.037 | 0.463768105 | 7 |
| Lars2         | 0.259  | 1     | 0.426 | 0.592211065 | 7 |

|          |        |       |       |             |   |
|----------|--------|-------|-------|-------------|---|
| Ramp1    | 0.479  | 0.763 | 0.231 | 0.858308539 | 7 |
| Flna     | -0.420 | 0.447 | 0.152 | 1           | 7 |
| Pgd      | -0.294 | 0.632 | 0.065 | 1           | 7 |
| Cd69     | -0.581 | 0.447 | 0.126 | 1           | 7 |
| Cd3e     | 1.220  | 1     | 0.572 | 1           | 7 |
| Prdx1    | -0.398 | 0.526 | 0.313 | 1           | 7 |
| Cd74     | -1.301 | 1     | 0.381 | 1           | 7 |
| Cd52     | 0.348  | 0.868 | 0.501 | 1           | 7 |
| Gm42418  | -0.577 | 1     | 0.952 | 1           | 7 |
| Dnajb1   | 0.735  | 0.447 | 0.105 | 1           | 7 |
| Ppp1r15a | 0.618  | 0.632 | 0.107 | 1           | 7 |
| Rgcc     | 0.610  | 0.211 | 0.023 | 1           | 7 |
| Tff1     | -0.608 | 0.947 | 0.802 | 1           | 7 |
| H2afz    | 0.280  | 0.868 | 0.448 | 1           | 7 |
| Ikzf2    | -0.911 | 1     | 0.417 | 1           | 7 |
| Psmb8    | 0.265  | 0.737 | 0.268 | 1           | 7 |
| Rps29    | -0.297 | 1     | 0.868 | 1           | 7 |
| Trdv4    | 0.951  | 0.447 | 0.006 | 1           | 7 |
| Nr4a1    | 0.364  | 0.5   | 0.243 | 1           | 7 |
| Blk      | 0.532  | 0.132 | 0.009 | 1           | 7 |
| Id3      | -0.464 | 0.605 | 0.088 | 1           | 7 |
| Tmem176b | 1.695  | 0.553 | 0.039 | 1           | 7 |
| Gm8369   | -1.073 | 0.132 | 0.172 | 1           | 7 |
| Cd2      | -0.280 | 0.526 | 0.171 | 1           | 7 |
| Ikzf3    | 0.872  | 0.5   | 0.161 | 1           | 7 |
| Malat1   | -0.441 | 1     | 0.953 | 1           | 7 |
| Gstp1    | 0.297  | 0.684 | 0.25  | 1           | 7 |
| Fam46c   | -0.487 | 0.579 | 0.067 | 1           | 7 |
| Il2rg    | -0.466 | 0.579 | 0.259 | 1           | 7 |
| Gbp4     | -0.415 | 0.5   | 0.078 | 1           | 7 |
| Pim1     | -0.327 | 0.553 | 0.2   | 1           | 7 |
| Ptprc    | 0.276  | 1     | 0.617 | 1           | 7 |
| Tnfsf8   | -0.866 | 0.053 | 0.11  | 1           | 7 |
| Dusp1    | -0.367 | 0.605 | 0.274 | 1           | 7 |
| Ets1     | -0.274 | 0.947 | 0.536 | 1           | 7 |
| Ptpn18   | -0.364 | 0.711 | 0.395 | 1           | 7 |
| Gm26917  | -1.099 | 0.842 | 0.392 | 1           | 7 |
| Zfp36l2  | 0.543  | 0.579 | 0.265 | 1           | 7 |
| Tuba1b   | 0.659  | 0.526 | 0.135 | 1           | 7 |
| Rps15    | -0.637 | 1     | 0.541 | 1           | 7 |
| Izumo1r  | -1.114 | 0.684 | 0.247 | 1           | 7 |
| Hmgcs1   | -0.281 | 0.553 | 0.076 | 1           | 7 |
| Hmgn2    | 0.375  | 0.553 | 0.09  | 1           | 7 |
| Gkn2     | -0.917 | 0.789 | 0.366 | 1           | 7 |
| Gkn1     | -0.863 | 0.789 | 0.412 | 1           | 7 |
| AW112010 | -0.269 | 0.789 | 0.521 | 1           | 7 |
| Cd48     | 0.434  | 0.526 | 0.074 | 1           | 7 |
| Psca     | -0.283 | 0.684 | 0.333 | 1           | 7 |
| Lat      | -0.294 | 0.684 | 0.287 | 1           | 7 |
| Cd44     | -0.518 | 0.605 | 0.191 | 1           | 7 |

|           |        |       |       |             |   |
|-----------|--------|-------|-------|-------------|---|
| Chia1     | -0.638 | 0.789 | 0.437 | 1           | 7 |
| Emp3      | 0.360  | 0.553 | 0.121 | 1           | 7 |
| Mcpt1     | -0.255 | 0.973 | 0.027 | 1.99E-101   | 8 |
| Chga      | -0.351 | 1     | 0.051 | 5.00E-92    | 8 |
| Chil4     | -0.451 | 0.823 | 0.028 | 2.28E-83    | 8 |
| Igkc      | -0.303 | 1     | 0.085 | 1.97E-71    | 8 |
| Mcpt2     | -0.527 | 0.858 | 0.044 | 4.95E-67    | 8 |
| Sst       | -0.373 | 0.965 | 0.085 | 9.95E-61    | 8 |
| Cxcl10    | -0.513 | 0.947 | 0.133 | 7.80E-45    | 8 |
| Serpina3g | -0.253 | 0.885 | 0.127 | 6.23E-41    | 8 |
| Reg1      | -0.307 | 0.779 | 0.131 | 1.87E-30    | 8 |
| Gldc      | 0.266  | 0.982 | 0.233 | 9.00E-29    | 8 |
| Icam1     | -0.330 | 0.965 | 0.19  | 3.82E-26    | 8 |
| Reg3g     | -0.587 | 1     | 0.224 | 1.57E-23    | 8 |
| Sprr1a    | -0.736 | 0.991 | 0.233 | 2.19E-22    | 8 |
| Gsta2     | 0.321  | 0.956 | 0.271 | 4.45E-20    | 8 |
| Socs1     | -0.281 | 1     | 0.245 | 7.04E-20    | 8 |
| Gbp7      | -0.251 | 1     | 0.247 | 5.39E-19    | 8 |
| Gbp4      | -0.411 | 1     | 0.249 | 1.46E-18    | 8 |
| Gm3336    | 0.344  | 0.956 | 0.311 | 1.76E-18    | 8 |
| Egln3     | 0.254  | 0.929 | 0.262 | 1.88E-17    | 8 |
| Gsta1     | 0.269  | 0.912 | 0.254 | 4.01E-17    | 8 |
| Ccnb1     | 0.272  | 0.991 | 0.338 | 6.21E-15    | 8 |
| Pttg1     | 0.460  | 0.973 | 0.448 | 1.35E-12    | 8 |
| Ido1      | -0.322 | 1     | 0.294 | 1.29E-11    | 8 |
| Gkn1      | 1.090  | 0.947 | 0.694 | 1.71E-11    | 8 |
| Cyp2s1    | 0.388  | 0.867 | 0.309 | 4.70E-11    | 8 |
| Gkn2      | 0.990  | 0.912 | 0.603 | 8.60E-11    | 8 |
| Hist1h2ao | -0.304 | 1     | 0.3   | 9.21E-11    | 8 |
| Ccnb2     | 0.371  | 0.894 | 0.372 | 1.19E-10    | 8 |
| Cd74      | -0.401 | 1     | 0.992 | 1.55E-10    | 8 |
| Cdca3     | 0.321  | 0.973 | 0.433 | 7.86E-10    | 8 |
| H2-Aa     | -0.520 | 1     | 0.954 | 3.04E-09    | 8 |
| Tff1      | 0.799  | 0.973 | 0.861 | 5.13E-09    | 8 |
| H2-Eb1    | -0.528 | 1     | 0.918 | 2.43E-08    | 8 |
| Cenpa     | 0.463  | 0.938 | 0.512 | 3.92E-08    | 8 |
| Cdc20     | 0.287  | 0.894 | 0.342 | 8.10E-08    | 8 |
| Psca      | 0.599  | 0.973 | 0.886 | 1.81E-07    | 8 |
| H2-K1     | -0.296 | 1     | 0.994 | 1.72E-06    | 8 |
| Ube2c     | 0.602  | 0.982 | 0.626 | 2.09E-06    | 8 |
| Dpcr1     | 0.651  | 0.858 | 0.478 | 2.46E-06    | 8 |
| Tagln2    | 0.332  | 1     | 0.958 | 3.18E-06    | 8 |
| Ethe1     | 0.269  | 0.982 | 0.507 | 6.85E-06    | 8 |
| Sptssb    | 0.361  | 0.903 | 0.457 | 9.67E-06    | 8 |
| Pla2g10   | 0.267  | 0.947 | 0.539 | 1.25E-05    | 8 |
| Lypd8     | 0.315  | 0.956 | 0.503 | 1.66E-05    | 8 |
| Tesc      | 0.266  | 0.894 | 0.501 | 4.80E-05    | 8 |
| Lgals2    | 0.391  | 1     | 0.932 | 6.64E-05    | 8 |
| Birc5     | 0.385  | 0.991 | 0.655 | 7.65E-05    | 8 |
| Gm3776    | 0.415  | 0.832 | 0.41  | 0.000139955 | 8 |

|               |        |       |       |             |   |
|---------------|--------|-------|-------|-------------|---|
| Me1           | 0.294  | 1     | 0.554 | 0.000152786 | 8 |
| H2-Ab1        | -0.449 | 1     | 0.954 | 0.000220841 | 8 |
| Dmbt1         | -0.987 | 1     | 0.81  | 0.000368088 | 8 |
| Tff2          | 0.373  | 0.947 | 0.825 | 0.000390973 | 8 |
| Atp4b         | 0.517  | 0.434 | 0.241 | 0.001026796 | 8 |
| Tubb4b        | 0.429  | 0.991 | 0.854 | 0.001400342 | 8 |
| Klf4          | 0.289  | 0.991 | 0.744 | 0.002031135 | 8 |
| Arl14         | 0.455  | 0.85  | 0.528 | 0.002876894 | 8 |
| Pla2g1b       | -0.893 | 0.982 | 0.985 | 0.005313349 | 8 |
| Arl6ip1       | 0.384  | 0.991 | 0.824 | 0.007577878 | 8 |
| Clps          | -1.219 | 1     | 0.996 | 0.009748715 | 8 |
| Cotl1         | 0.377  | 0.982 | 0.715 | 0.009784527 | 8 |
| Clspn         | -0.324 | 0.991 | 0.387 | 0.01112125  | 8 |
| Pgd           | 0.276  | 1     | 0.694 | 0.011177575 | 8 |
| Clu           | -0.478 | 0.982 | 0.991 | 0.027255257 | 8 |
| Iigp1         | -0.531 | 1     | 0.389 | 0.038493817 | 8 |
| Pigr          | -0.500 | 1     | 0.928 | 0.059818026 | 8 |
| Mogat1        | 0.325  | 0.805 | 0.429 | 0.072995276 | 8 |
| C2cd4a        | 0.319  | 0.85  | 0.435 | 0.074697086 | 8 |
| Clic1         | 0.285  | 0.982 | 0.875 | 0.075251485 | 8 |
| Cym           | -2.239 | 1     | 0.423 | 0.079014195 | 8 |
| Tmem176b      | -0.263 | 0.982 | 0.414 | 0.119771088 | 8 |
| H2-T23        | -0.445 | 1     | 0.712 | 0.121999287 | 8 |
| Rbp2          | 0.277  | 0.796 | 0.45  | 0.203108838 | 8 |
| Esd           | 0.265  | 0.938 | 0.844 | 0.273636211 | 8 |
| Mfge8         | -0.306 | 0.841 | 0.687 | 0.349484795 | 8 |
| Fabp3         | 0.264  | 0.442 | 0.074 | 0.355989301 | 8 |
| Mgst3         | 0.260  | 1     | 0.966 | 0.365884535 | 8 |
| Kpna2         | 0.315  | 0.867 | 0.457 | 0.384600952 | 8 |
| Nqo1          | 0.304  | 0.805 | 0.461 | 0.428410887 | 8 |
| H2-DMA        | -0.442 | 1     | 0.757 | 0.503982239 | 8 |
| Rfk           | 0.283  | 0.85  | 0.602 | 0.510552376 | 8 |
| Anxa2         | -0.286 | 1     | 0.463 | 0.556678633 | 8 |
| Clca3a2       | -0.558 | 1     | 0.398 | 0.598032305 | 8 |
| Sprr2a3       | 0.949  | 1     | 0.873 | 0.643419728 | 8 |
| Mcm6          | -0.381 | 0.735 | 0.522 | 1           | 8 |
| Wfdc2         | -0.307 | 0.681 | 0.607 | 1           | 8 |
| Tuba1c        | 0.359  | 0.982 | 0.639 | 1           | 8 |
| 2210407C18Rik | 0.721  | 1     | 0.898 | 1           | 8 |
| Ly6e          | -0.539 | 1     | 0.742 | 1           | 8 |
| Pgc           | -0.720 | 1     | 0.998 | 1           | 8 |
| AY036118      | -0.495 | 1     | 0.941 | 1           | 8 |
| Id3           | 0.254  | 0.991 | 0.875 | 1           | 8 |
| Ckmt1         | 0.252  | 0.991 | 0.797 | 1           | 8 |
| Wars          | -0.390 | 1     | 0.753 | 1           | 8 |
| Zfp36l2       | -0.280 | 0.929 | 0.759 | 1           | 8 |
| Dut           | -0.296 | 0.814 | 0.622 | 1           | 8 |
| Pcna          | -0.370 | 0.973 | 0.679 | 1           | 8 |
| Slbp          | -0.398 | 0.858 | 0.59  | 1           | 8 |
| Gbp2          | -0.341 | 1     | 0.442 | 1           | 8 |



|           |        |       |       |          |   |
|-----------|--------|-------|-------|----------|---|
| Hist1h2ap | -0.833 | 1     | 0.674 | 1        | 8 |
| Ckb       | 0.274  | 0.575 | 0.049 | 1        | 8 |
| Gm26917   | -0.252 | 1     | 0.92  | 1        | 8 |
| Uhrf1     | -0.405 | 0.788 | 0.497 | 1        | 8 |
| Hspa1b    | -0.317 | 1     | 0.843 | 1        | 8 |
| Mcm5      | -0.334 | 1     | 0.48  | 1        | 8 |
| Gif       | -0.658 | 0.788 | 0.343 | 1        | 8 |
| Bpifb1    | -1.211 | 1     | 0.476 | 1        | 8 |
| Pga5      | -0.394 | 0.929 | 0.505 | 1        | 8 |
| Apoa1     | 0.337  | 0.646 | 0.184 | 1        | 8 |
| Hells     | -0.629 | 1     | 0.583 | 1        | 8 |
| Ly6a      | -1.229 | 1     | 0.662 | 1        | 8 |
| Chka      | -0.261 | 0.965 | 0.548 | 1        | 8 |
| Gbp2b     | -0.604 | 1     | 0.465 | 1        | 8 |
| H2-DMb2   | -0.388 | 1     | 0.573 | 1        | 8 |
| Irf1      | -0.404 | 1     | 0.49  | 1        | 8 |
| AW112010  | -0.539 | 1     | 0.829 | 1        | 8 |
| Igtp      | -0.373 | 1     | 0.522 | 1        | 8 |
| Spink4    | -0.400 | 0.823 | 0.493 | 1        | 8 |
| Lig1      | -0.314 | 0.903 | 0.537 | 1        | 8 |
| Ifitm3    | -0.617 | 1     | 0.579 | 1        | 8 |
| Atp4a     | 0.281  | 0.611 | 0.176 | 1        | 8 |
| Rrm2      | -0.257 | 0.912 | 0.545 | 1        | 8 |
| Sfn9      | -0.501 | 1     | 0.51  | 1        | 8 |
| Irgm1     | -0.368 | 1     | 0.529 | 1        | 8 |
| Pglyrp1   | -0.379 | 0.991 | 0.55  | 1        | 8 |
| Hist1h2ae | -0.379 | 0.761 | 0.391 | 1        | 8 |
| Ubd       | -0.986 | 1     | 0.514 | 1        | 8 |
| Spink4    | -0.744 | 0.99  | 0.068 | 1.94E-61 | 9 |
| Igkc      | -0.271 | 1     | 0.079 | 8.72E-61 | 9 |
| Cxcl10    | -0.391 | 0.954 | 0.073 | 1.03E-56 | 9 |
| Bpifb1    | -0.329 | 1     | 0.099 | 5.83E-55 | 9 |
| Muc6      | -0.394 | 1     | 0.099 | 7.70E-55 | 9 |
| Gm4951    | -0.307 | 0.986 | 0.094 | 1.61E-54 | 9 |
| Pigr      | -0.511 | 1     | 0.11  | 9.44E-52 | 9 |
| Hbegf     | -0.299 | 0.974 | 0.089 | 2.49E-51 | 9 |
| Igfbp5    | -1.046 | 0.887 | 0.037 | 1.43E-48 | 9 |
| Mgp       | 0.353  | 0.954 | 0.089 | 3.88E-48 | 9 |
| Gbp2b     | -0.294 | 1     | 0.141 | 2.71E-44 | 9 |
| Serpina3f | -0.413 | 0.94  | 0.126 | 2.74E-41 | 9 |
| Lst1      | -0.352 | 0.906 | 0.084 | 1.51E-40 | 9 |
| Gfpt1     | -0.298 | 1     | 0.157 | 2.08E-40 | 9 |
| Penk      | 0.726  | 0.815 | 0.021 | 5.10E-40 | 9 |
| Hbb-bs    | 1.447  | 0.913 | 0.094 | 2.16E-39 | 9 |
| Mylk      | -0.285 | 0.94  | 0.136 | 5.07E-38 | 9 |
| Agr2      | -0.272 | 1     | 0.173 | 8.83E-38 | 9 |
| Pxdn      | -0.303 | 0.95  | 0.141 | 1.25E-37 | 9 |
| Cym       | -0.484 | 1     | 0.173 | 2.93E-36 | 9 |
| Col18a1   | -0.338 | 0.925 | 0.126 | 4.54E-34 | 9 |
| C1s1      | -0.312 | 0.952 | 0.152 | 8.38E-34 | 9 |

|           |        |       |       |          |   |
|-----------|--------|-------|-------|----------|---|
| Ccl21a    | -0.985 | 0.909 | 0.131 | 9.29E-33 | 9 |
| Car2      | -0.338 | 1     | 0.194 | 1.33E-32 | 9 |
| Gm36756   | -0.311 | 0.909 | 0.152 | 1.66E-32 | 9 |
| Serpina3g | -0.597 | 0.993 | 0.188 | 2.79E-31 | 9 |
| Oit1      | -0.276 | 0.971 | 0.173 | 3.31E-31 | 9 |
| Sulf1     | -0.265 | 0.226 | 0.178 | 1.32E-28 | 9 |
| Serpinb6b | -0.351 | 0.928 | 0.162 | 1.37E-27 | 9 |
| Snhg18    | -0.383 | 0.942 | 0.168 | 7.38E-27 | 9 |
| Adamts4   | -0.302 | 0.81  | 0.084 | 5.28E-26 | 9 |
| Plac8     | -0.652 | 0.99  | 0.22  | 2.52E-25 | 9 |
| Rgs16     | -0.318 | 0.248 | 0.12  | 3.18E-24 | 9 |
| Serpinb1a | -0.879 | 0.986 | 0.22  | 4.59E-24 | 9 |
| Cxcl13    | -0.470 | 0.567 | 0.016 | 5.26E-24 | 9 |
| Glycam1   | -4.298 | 0.923 | 0.204 | 3.40E-23 | 9 |
| Cotl1     | -0.293 | 0.998 | 0.241 | 4.42E-23 | 9 |
| Tmem189   | -0.352 | 0.87  | 0.126 | 1.07E-22 | 9 |
| Hilpda    | -0.356 | 0.267 | 0.131 | 1.52E-22 | 9 |
| Aqp7      | 0.251  | 0.19  | 0.01  | 1.71E-22 | 9 |
| Vwf       | -0.575 | 0.889 | 0.183 | 4.26E-22 | 9 |
| Selp      | -0.278 | 0.846 | 0.188 | 4.72E-22 | 9 |
| H2-Aa     | -0.767 | 1     | 0.246 | 5.08E-22 | 9 |
| Flna      | -0.499 | 0.293 | 0.215 | 2.20E-21 | 9 |
| H2-Eb1    | -0.836 | 1     | 0.246 | 2.65E-21 | 9 |
| Lbh       | -0.254 | 0.971 | 0.236 | 5.03E-21 | 9 |
| Tmed3     | -0.475 | 0.31  | 0.257 | 5.31E-21 | 9 |
| Ubd       | -2.117 | 1     | 0.251 | 6.84E-20 | 9 |
| Smc4      | -0.264 | 0.288 | 0.136 | 1.81E-19 | 9 |
| Neurl3    | -0.447 | 0.921 | 0.209 | 5.27E-19 | 9 |
| Pf4       | -0.575 | 0.832 | 0.147 | 8.44E-19 | 9 |
| Prr13     | -0.430 | 0.332 | 0.283 | 2.18E-18 | 9 |
| Abhd2     | -0.261 | 0.832 | 0.115 | 3.49E-18 | 9 |
| Krt19     | -0.342 | 0.829 | 0.115 | 4.60E-18 | 9 |
| Csf2rb    | -0.401 | 0.82  | 0.199 | 6.19E-18 | 9 |
| Csf2rb2   | -0.495 | 0.913 | 0.225 | 6.90E-18 | 9 |
| Gif       | 0.417  | 0.832 | 0.131 | 2.88E-17 | 9 |
| Pglyrp1   | -1.084 | 0.942 | 0.241 | 7.85E-17 | 9 |
| Tfpi      | -0.542 | 0.887 | 0.215 | 1.38E-15 | 9 |
| Timp2     | -0.332 | 0.942 | 0.246 | 2.78E-15 | 9 |
| Tgfb1     | -0.420 | 0.337 | 0.277 | 4.98E-15 | 9 |
| Rfk       | -0.299 | 0.351 | 0.236 | 5.85E-15 | 9 |
| Rbp1      | -0.583 | 0.877 | 0.204 | 1.28E-14 | 9 |
| Id2       | -0.278 | 0.322 | 0.131 | 3.14E-14 | 9 |
| Socs3     | -0.487 | 0.394 | 0.408 | 3.45E-14 | 9 |
| Bcl6b     | -0.480 | 0.298 | 0.131 | 3.94E-14 | 9 |
| Tgfb1     | -0.698 | 0.849 | 0.225 | 5.88E-14 | 9 |
| Cxcl1     | -1.200 | 0.349 | 0.204 | 8.84E-14 | 9 |
| Tff2      | -0.543 | 0.962 | 0.288 | 1.84E-13 | 9 |
| Gm11361   | -0.494 | 0.959 | 0.267 | 1.89E-13 | 9 |
| Spr2a3    | -0.950 | 1     | 0.314 | 2.85E-13 | 9 |
| Enpp2     | -1.063 | 0.938 | 0.257 | 3.60E-13 | 9 |

|          |        |       |       |             |   |
|----------|--------|-------|-------|-------------|---|
| Hspa1b   | -0.632 | 0.964 | 0.293 | 3.99E-13    | 9 |
| Gm32688  | -0.425 | 0.32  | 0.204 | 5.10E-13    | 9 |
| H2-Ab1   | -0.707 | 1     | 0.346 | 8.67E-13    | 9 |
| Cxcl2    | -0.358 | 0.486 | 0.089 | 3.56E-12    | 9 |
| Isg15    | 0.393  | 0.839 | 0.204 | 3.87E-12    | 9 |
| Ppp1r15a | -0.635 | 0.478 | 0.524 | 6.99E-12    | 9 |
| Tppp3    | -0.374 | 0.611 | 0.037 | 1.28E-11    | 9 |
| Mustn1   | -0.343 | 0.382 | 0.277 | 1.69E-11    | 9 |
| Sox7     | -0.285 | 0.875 | 0.257 | 2.02E-11    | 9 |
| Icam1    | -0.478 | 0.978 | 0.309 | 2.56E-11    | 9 |
| Madcam1  | -1.328 | 0.534 | 0.126 | 3.47E-11    | 9 |
| Nkx2-3   | -0.257 | 0.358 | 0.183 | 6.85E-11    | 9 |
| Dab2     | -0.364 | 0.952 | 0.314 | 2.70E-10    | 9 |
| Ctse     | -0.275 | 0.731 | 0.068 | 6.34E-10    | 9 |
| Lamb1    | -0.354 | 0.37  | 0.157 | 6.86E-10    | 9 |
| Vcam1    | -0.387 | 0.849 | 0.267 | 1.34E-09    | 9 |
| Csrp1    | -0.600 | 0.43  | 0.319 | 1.70E-09    | 9 |
| Ugdh     | -0.279 | 0.346 | 0.073 | 2.18E-09    | 9 |
| Aqp1     | -0.817 | 0.781 | 0.204 | 5.08E-09    | 9 |
| Tpm1     | -0.341 | 0.416 | 0.298 | 6.05E-09    | 9 |
| Thbs1    | -0.637 | 0.976 | 0.346 | 1.53E-08    | 9 |
| Bst1     | -0.266 | 0.45  | 0.11  | 1.88E-08    | 9 |
| Vwa1     | -0.317 | 0.406 | 0.267 | 4.13E-08    | 9 |
| BC028528 | -0.304 | 0.413 | 0.277 | 7.23E-08    | 9 |
| mt-Nd3   | -0.340 | 0.978 | 0.34  | 7.68E-08    | 9 |
| Cfb      | -0.346 | 0.536 | 0.157 | 7.79E-08    | 9 |
| Hamp     | -0.496 | 0.349 | 0.068 | 8.84E-08    | 9 |
| Gm13889  | -0.497 | 0.868 | 0.277 | 1.04E-07    | 9 |
| Nxph1    | -0.274 | 0.486 | 0.136 | 2.24E-07    | 9 |
| Ogfrl1   | -0.475 | 0.392 | 0.162 | 2.50E-07    | 9 |
| Marcksl1 | -0.570 | 0.849 | 0.23  | 3.32E-07    | 9 |
| Jam2     | 0.327  | 0.779 | 0.251 | 5.61E-07    | 9 |
| Gm11808  | -0.554 | 0.969 | 0.335 | 7.46E-07    | 9 |
| Vim      | -0.582 | 0.522 | 0.471 | 1.31E-06    | 9 |
| Ifitm3   | -0.453 | 0.966 | 0.88  | 1.61E-06    | 9 |
| Il2rg    | -0.364 | 0.433 | 0.246 | 2.39E-06    | 9 |
| Rnd1     | -0.368 | 0.933 | 0.335 | 3.67E-06    | 9 |
| Ch25h    | -0.364 | 0.389 | 0.168 | 7.61E-06    | 9 |
| Ier3     | -0.281 | 0.565 | 0.55  | 1.90E-05    | 9 |
| Rpl9-ps6 | -0.288 | 0.829 | 0.251 | 3.38E-05    | 9 |
| Gbp4     | -0.449 | 0.974 | 0.398 | 4.54E-05    | 9 |
| Iigp1    | -0.350 | 1     | 0.398 | 4.88E-05    | 9 |
| Serpine1 | -0.379 | 0.675 | 0.11  | 4.96E-05    | 9 |
| Iitm2a   | 0.313  | 0.368 | 0.073 | 5.67E-05    | 9 |
| AY036118 | -0.373 | 0.858 | 0.288 | 6.30E-05    | 9 |
| Cebpb    | -0.380 | 0.772 | 0.183 | 7.88E-05    | 9 |
| Pecam1   | -0.390 | 0.875 | 0.785 | 8.70E-05    | 9 |
| Ctsl     | -0.575 | 0.519 | 0.34  | 9.70E-05    | 9 |
| Cyr61    | -0.376 | 0.507 | 0.44  | 9.87E-05    | 9 |
| Ptprrr   | 0.442  | 0.382 | 0.063 | 0.000115923 | 9 |

|               |        |       |       |             |   |
|---------------|--------|-------|-------|-------------|---|
| Tgm2          | -0.312 | 0.832 | 0.267 | 0.000140988 | 9 |
| Fut7          | -0.584 | 0.486 | 0.168 | 0.000174497 | 9 |
| S100a13       | -0.598 | 0.644 | 0.581 | 0.000180635 | 9 |
| Chia1         | -0.320 | 0.791 | 0.23  | 0.000356331 | 9 |
| Id1           | -0.301 | 0.469 | 0.272 | 0.000748513 | 9 |
| 2200002D01Rik | -0.741 | 1     | 0.393 | 0.001142433 | 9 |
| Cpe           | -1.226 | 0.582 | 0.22  | 0.001159962 | 9 |
| Chst4         | -0.410 | 0.447 | 0.157 | 0.001696261 | 9 |
| Adgrf5        | -0.520 | 0.577 | 0.497 | 0.001772684 | 9 |
| Dclk1         | -0.619 | 0.498 | 0.178 | 0.002070602 | 9 |
| Lyve1         | -0.287 | 0.418 | 0.094 | 0.002484823 | 9 |
| Lrg1          | -1.133 | 0.94  | 0.356 | 0.003329363 | 9 |
| Prnp          | -0.410 | 0.514 | 0.314 | 0.005079821 | 9 |
| Mgst3         | -0.352 | 0.466 | 0.215 | 0.005442655 | 9 |
| Bcr           | -0.408 | 0.978 | 0.419 | 0.005556338 | 9 |
| Arl6ip1       | -0.269 | 0.488 | 0.335 | 0.010009565 | 9 |
| Tubb5         | -0.565 | 0.627 | 0.461 | 0.012234173 | 9 |
| Capg          | -0.476 | 0.834 | 0.283 | 0.012672846 | 9 |
| Tek           | -0.405 | 0.478 | 0.257 | 0.014128215 | 9 |
| Nfkbia        | -0.443 | 0.639 | 0.471 | 0.015019368 | 9 |
| Tuba1b        | -0.622 | 0.55  | 0.382 | 0.015616487 | 9 |
| Ehd3          | -0.367 | 0.454 | 0.251 | 0.024442497 | 9 |
| S1pr1         | -0.376 | 0.531 | 0.372 | 0.027047644 | 9 |
| Thbd          | -0.728 | 0.526 | 0.325 | 0.031191497 | 9 |
| Clu           | -1.422 | 0.94  | 0.382 | 0.066140485 | 9 |
| H2-T23        | -0.282 | 0.798 | 0.288 | 0.069504629 | 9 |
| Gkn3          | -0.442 | 0.635 | 0.058 | 0.084339459 | 9 |
| Psmb8         | -0.487 | 0.639 | 0.487 | 0.084349107 | 9 |
| Lyz2          | -0.447 | 0.608 | 0.021 | 0.111907108 | 9 |
| Ar            | -0.370 | 0.5   | 0.23  | 0.135470291 | 9 |
| Gkn2          | -0.274 | 0.834 | 0.366 | 0.139409151 | 9 |
| Egfl7         | -0.319 | 0.969 | 0.764 | 0.179350686 | 9 |
| Col15a1       | -0.490 | 0.62  | 0.455 | 0.192508463 | 9 |
| Bst2          | -0.469 | 0.613 | 0.429 | 0.201686692 | 9 |
| Exoc3l2       | -0.384 | 0.498 | 0.225 | 0.215699196 | 9 |
| Ucp2          | -0.326 | 0.536 | 0.319 | 0.255401145 | 9 |
| Btnl9         | -0.323 | 0.452 | 0.115 | 0.260384911 | 9 |
| Meox1         | -0.290 | 0.534 | 0.298 | 0.316817676 | 9 |
| Epas1         | -0.374 | 0.618 | 0.476 | 0.350011351 | 9 |
| Cks2          | -0.286 | 0.421 | 0.042 | 0.353021628 | 9 |
| H2afz         | -0.402 | 0.642 | 0.471 | 0.466600833 | 9 |
| Lars2         | -0.531 | 0.51  | 0.246 | 0.607916565 | 9 |
| Alpl          | 0.334  | 0.399 | 0.005 | 0.835093117 | 9 |
| Nes           | -0.381 | 0.433 | 0.094 | 0.919539894 | 9 |
| Gstp1         | 0.355  | 0.649 | 0.131 | 1           | 9 |
| Cyba          | -0.539 | 0.538 | 0.272 | 1           | 9 |
| Cavin1        | -0.324 | 0.959 | 0.471 | 1           | 9 |
| Hes1          | -0.553 | 0.986 | 0.45  | 1           | 9 |
| Mfge8         | -1.282 | 0.731 | 0.461 | 1           | 9 |
| Ube2s         | -0.363 | 0.776 | 0.272 | 1           | 9 |

|          |        |       |       |   |   |
|----------|--------|-------|-------|---|---|
| Sox18    | -0.451 | 0.502 | 0.241 | 1 | 9 |
| Klf4     | -0.558 | 0.671 | 0.487 | 1 | 9 |
| Clps     | -0.282 | 1     | 0.613 | 1 | 9 |
| Tnfrsf25 | -0.418 | 0.764 | 0.257 | 1 | 9 |
| Col4a2   | -0.463 | 0.7   | 0.534 | 1 | 9 |
| Gng11    | -0.510 | 0.784 | 0.55  | 1 | 9 |
| Pdlim1   | -0.409 | 0.964 | 0.44  | 1 | 9 |
| Sema7a   | -0.348 | 0.51  | 0.199 | 1 | 9 |
| Cdc42ep3 | -0.254 | 0.519 | 0.23  | 1 | 9 |
| Plpp1    | -0.384 | 0.695 | 0.194 | 1 | 9 |
| Prss23   | -0.545 | 0.774 | 0.283 | 1 | 9 |
| Ube2c    | -0.374 | 0.399 | 0.042 | 1 | 9 |
| Cyrr1    | -0.393 | 0.608 | 0.44  | 1 | 9 |
| Chst2    | -0.372 | 0.688 | 0.22  | 1 | 9 |
| Adamts1  | -0.513 | 0.534 | 0.257 | 1 | 9 |
| Rpl17    | -0.426 | 0.988 | 0.681 | 1 | 9 |
| Stc1     | -0.542 | 0.663 | 0.188 | 1 | 9 |
| Zfp36    | -0.281 | 0.769 | 0.707 | 1 | 9 |
| Dusp1    | -0.258 | 0.724 | 0.649 | 1 | 9 |
| Irf8     | -0.400 | 0.642 | 0.12  | 1 | 9 |
| Nme2     | -0.330 | 0.714 | 0.262 | 1 | 9 |
| Ramp2    | -0.419 | 0.88  | 0.634 | 1 | 9 |
| Neat1    | -0.276 | 1     | 0.503 | 1 | 9 |
| Adgrl4   | -0.320 | 0.587 | 0.33  | 1 | 9 |
| Hspa1a   | -0.604 | 0.618 | 0.346 | 1 | 9 |
| Clec14a  | -0.336 | 0.654 | 0.419 | 1 | 9 |
| Acvr11   | -0.251 | 0.562 | 0.293 | 1 | 9 |
| Arhgap31 | -0.413 | 0.671 | 0.461 | 1 | 9 |
| Bace2    | -0.383 | 0.704 | 0.22  | 1 | 9 |
| Serpinh1 | -0.540 | 0.673 | 0.408 | 1 | 9 |
| Igfbp7   | -0.312 | 0.952 | 0.859 | 1 | 9 |
| Rtl8a    | -0.386 | 0.8   | 0.361 | 1 | 9 |
| Adam15   | -0.316 | 0.575 | 0.314 | 1 | 9 |
| S100a6   | -0.808 | 0.87  | 0.398 | 1 | 9 |
| Adamts9  | -0.275 | 0.534 | 0.22  | 1 | 9 |
| Tmem35a  | 0.325  | 0.411 | 0.016 | 1 | 9 |
| Mcam     | -0.540 | 0.702 | 0.267 | 1 | 9 |
| Anxa3    | -0.258 | 0.596 | 0.325 | 1 | 9 |
| Plvap    | -0.346 | 0.935 | 0.806 | 1 | 9 |
| Gucy1a1  | -0.312 | 0.132 | 0.047 | 1 | 9 |
| Cd34     | -0.352 | 0.75  | 0.545 | 1 | 9 |
| Eng      | -0.337 | 0.825 | 0.618 | 1 | 9 |
| Ltbp4    | -0.288 | 0.63  | 0.356 | 1 | 9 |
| Hspg2    | -0.474 | 0.74  | 0.529 | 1 | 9 |
| Heg1     | -0.296 | 0.644 | 0.387 | 1 | 9 |
| Crip1    | -0.580 | 0.923 | 0.785 | 1 | 9 |
| Pcp4l1   | 0.399  | 0.584 | 0.079 | 1 | 9 |
| Slc43a3  | -0.331 | 0.603 | 0.314 | 1 | 9 |
| Tmem176b | -0.298 | 0.707 | 0.503 | 1 | 9 |
| Mef2c    | -0.318 | 0.671 | 0.466 | 1 | 9 |

|           |        |       |       |   |   |
|-----------|--------|-------|-------|---|---|
| Gimap6    | -0.375 | 0.635 | 0.356 | 1 | 9 |
| Crip2     | -0.371 | 0.921 | 0.644 | 1 | 9 |
| Timp3     | -0.442 | 0.935 | 0.56  | 1 | 9 |
| Grrp1     | -0.347 | 0.635 | 0.34  | 1 | 9 |
| Tmem176a  | -0.254 | 0.668 | 0.408 | 1 | 9 |
| Esam      | -0.397 | 0.81  | 0.565 | 1 | 9 |
| Sparc     | -0.499 | 0.899 | 0.639 | 1 | 9 |
| Apold1    | -0.270 | 0.928 | 0.539 | 1 | 9 |
| Mmrn2     | -0.369 | 0.885 | 0.503 | 1 | 9 |
| Tm4sf1    | -0.321 | 0.901 | 0.733 | 1 | 9 |
| Cd74      | -0.775 | 1     | 0.529 | 1 | 9 |
| Sgk1      | -0.408 | 0.666 | 0.419 | 1 | 9 |
| Tagln2    | -0.484 | 0.75  | 0.471 | 1 | 9 |
| Cd36      | -0.382 | 0.671 | 0.246 | 1 | 9 |
| Phlda1    | -0.430 | 0.577 | 0.199 | 1 | 9 |
| Serpinb9  | -0.434 | 0.611 | 0.246 | 1 | 9 |
| Rps29     | 0.280  | 1     | 0.948 | 1 | 9 |
| Mgl1      | -0.437 | 0.712 | 0.293 | 1 | 9 |
| Rflnb     | -0.340 | 0.704 | 0.277 | 1 | 9 |
| Zfp979    | -0.295 | 0.611 | 0.183 | 1 | 9 |
| Tff1      | -0.280 | 0.945 | 0.723 | 1 | 9 |
| Cav1      | -0.412 | 0.894 | 0.613 | 1 | 9 |
| Id3       | -0.454 | 0.844 | 0.508 | 1 | 9 |
| Dlc1      | -0.270 | 0.675 | 0.387 | 1 | 9 |
| Ctla2a    | -0.379 | 0.925 | 0.607 | 1 | 9 |
| Mmrn1     | -0.279 | 0.144 | 0.026 | 1 | 9 |
| Pcdh17    | -0.350 | 0.666 | 0.33  | 1 | 9 |
| Cd300lg   | -0.283 | 0.613 | 0.225 | 1 | 9 |
| Podxl     | -0.295 | 0.757 | 0.476 | 1 | 9 |
| Hist1h1c  | -0.304 | 0.565 | 0.147 | 1 | 9 |
| Cavin3    | -0.333 | 0.798 | 0.503 | 1 | 9 |
| Cst3      | -0.476 | 0.971 | 0.66  | 1 | 9 |
| Cd93      | -0.277 | 0.808 | 0.555 | 1 | 9 |
| Col13a1   | 0.304  | 0.514 | 0.115 | 1 | 9 |
| Nid1      | -0.305 | 0.599 | 0.199 | 1 | 9 |
| Hspb1     | -0.451 | 0.875 | 0.565 | 1 | 9 |
| Anxa2     | -0.360 | 0.796 | 0.419 | 1 | 9 |
| Rpl23a    | -0.628 | 0.99  | 0.565 | 1 | 9 |
| Cdh5      | -0.257 | 0.93  | 0.696 | 1 | 9 |
| Col4a1    | -0.545 | 0.87  | 0.571 | 1 | 9 |
| AW112010  | -0.262 | 0.805 | 0.56  | 1 | 9 |
| Plk2      | -0.284 | 0.731 | 0.408 | 1 | 9 |
| Malat1    | 0.864  | 1     | 0.979 | 1 | 9 |
| Icam2     | -0.283 | 0.656 | 0.319 | 1 | 9 |
| Hmgb2     | -0.445 | 0.601 | 0.194 | 1 | 9 |
| Emcn      | -0.501 | 0.851 | 0.508 | 1 | 9 |
| Clic1     | -0.292 | 0.882 | 0.555 | 1 | 9 |
| Apoe      | -0.557 | 0.733 | 0.351 | 1 | 9 |
| Serpina1b | -1.464 | 0.514 | 0.241 | 1 | 9 |
| Selenom   | -0.532 | 0.714 | 0.346 | 1 | 9 |

|               |        |       |       |             |    |
|---------------|--------|-------|-------|-------------|----|
| Srgn          | -0.259 | 0.81  | 0.503 | 1           | 9  |
| Il6           | -0.309 | 0.447 | 0.031 | 1           | 9  |
| Ifit1bl1      | -0.259 | 0.926 | 0.108 | 1.44E-57    | 10 |
| Atp4a         | 0.426  | 0.935 | 0.137 | 7.54E-41    | 10 |
| Ly6d          | -0.406 | 1     | 0.213 | 4.11E-34    | 10 |
| Duox2         | -0.255 | 0.982 | 0.205 | 1.01E-31    | 10 |
| Ilgp1         | -0.390 | 1     | 0.266 | 1.73E-20    | 10 |
| Cd74          | -0.315 | 1     | 0.992 | 1.09E-12    | 10 |
| Cym           | -0.894 | 1     | 0.324 | 2.15E-12    | 10 |
| H2-Aa         | -0.353 | 1     | 0.953 | 4.32E-12    | 10 |
| Clca3a2       | -0.432 | 1     | 0.316 | 6.80E-12    | 10 |
| H2-Ab1        | -0.329 | 1     | 0.95  | 1.85E-09    | 10 |
| Phgr1         | 0.252  | 0.889 | 0.416 | 6.01E-06    | 10 |
| AW112010      | -0.545 | 1     | 0.958 | 2.07E-05    | 10 |
| Isg15         | -0.430 | 1     | 0.387 | 2.47E-05    | 10 |
| H2-Eb1        | -0.319 | 1     | 0.913 | 2.54E-05    | 10 |
| Pigr          | -0.511 | 1     | 0.895 | 2.76E-05    | 10 |
| Rbp2          | 0.389  | 0.972 | 0.776 | 0.000281837 | 10 |
| Mxd1          | -0.280 | 1     | 0.453 | 0.002113332 | 10 |
| Fam13a        | -0.298 | 0.687 | 0.132 | 0.018071804 | 10 |
| H2-DMA        | -0.343 | 1     | 0.753 | 0.064326205 | 10 |
| Ghrl          | -0.522 | 1     | 0.45  | 0.103840249 | 10 |
| Chia1         | -0.436 | 0.848 | 0.437 | 0.224860194 | 10 |
| H2-T23        | -0.333 | 1     | 0.753 | 0.267444188 | 10 |
| Ido1          | -0.469 | 1     | 0.484 | 0.926653939 | 10 |
| Sprr1a        | -0.518 | 1     | 0.558 | 1           | 10 |
| Clu           | -0.351 | 0.995 | 0.958 | 1           | 10 |
| Dmbt1         | -0.669 | 1     | 0.816 | 1           | 10 |
| Wars          | -0.282 | 1     | 0.853 | 1           | 10 |
| Malat1        | -0.278 | 1     | 1     | 1           | 10 |
| Hspa1b        | -0.340 | 1     | 0.908 | 1           | 10 |
| Chka          | -0.413 | 1     | 0.574 | 1           | 10 |
| 9130204L05Rik | -0.458 | 0.535 | 0.189 | 1           | 10 |
| Gsdmc2        | -0.295 | 1     | 0.811 | 1           | 10 |
| Neat1         | -0.615 | 1     | 0.953 | 1           | 10 |
| Irf1          | -0.265 | 1     | 0.495 | 1           | 10 |
| Ubd           | -0.759 | 1     | 0.503 | 1           | 10 |
| Ly6e          | -0.344 | 1     | 0.711 | 1           | 10 |
| Igtp          | -0.428 | 1     | 0.642 | 1           | 10 |
| Ly6a          | -0.973 | 1     | 0.674 | 1           | 10 |
| Idi1          | -0.256 | 0.991 | 0.655 | 1           | 10 |
| Gbp2b         | -0.476 | 1     | 0.563 | 1           | 10 |
| Irgm1         | -0.331 | 1     | 0.582 | 1           | 10 |
| Smim24        | 0.278  | 0.562 | 0.197 | 1           | 10 |
| Wfdc18        | -0.335 | 1     | 0.042 | 2.85E-78    | 11 |
| H2-Eb1        | 0.348  | 1     | 0.082 | 3.53E-56    | 11 |
| H2-Aa         | 0.487  | 1     | 0.088 | 1.46E-55    | 11 |
| Chil4         | -0.635 | 1     | 0.086 | 2.42E-52    | 11 |
| Psmb8         | 0.342  | 1     | 0.096 | 5.62E-52    | 11 |
| H2-Ab1        | 0.485  | 1     | 0.104 | 5.77E-51    | 11 |

|               |        |       |       |             |    |
|---------------|--------|-------|-------|-------------|----|
| Hamp2         | 0.486  | 0.175 | 0     | 3.75E-50    | 11 |
| Igfbp5        | -0.316 | 0.984 | 0.122 | 2.58E-35    | 11 |
| Bpifb1        | -0.563 | 1     | 0.138 | 2.63E-33    | 11 |
| Gast          | -0.392 | 1     | 0.146 | 5.81E-31    | 11 |
| Oasl1         | 0.374  | 1     | 0.176 | 3.32E-29    | 11 |
| Lgals2        | 1.368  | 1     | 0.64  | 3.10E-28    | 11 |
| Cd74          | 0.473  | 1     | 0.244 | 5.61E-27    | 11 |
| AW112010      | 0.677  | 1     | 0.292 | 3.87E-26    | 11 |
| Psca          | 1.214  | 1     | 0.696 | 2.07E-24    | 11 |
| Snhg18        | -0.384 | 0.222 | 0.162 | 1.42E-22    | 11 |
| Edn2          | -0.442 | 0.921 | 0.136 | 1.04E-21    | 11 |
| Muc6          | -0.791 | 1     | 0.188 | 3.07E-21    | 11 |
| Itln1         | -0.695 | 1     | 0.194 | 4.67E-20    | 11 |
| 2210407C18Rik | 0.917  | 1     | 0.84  | 1.30E-19    | 11 |
| Ifi2712b      | 0.256  | 1     | 0.226 | 4.27E-19    | 11 |
| B930036N10Rik | -0.344 | 0.254 | 0.148 | 5.72E-19    | 11 |
| Edn1          | -0.295 | 0.921 | 0.162 | 7.59E-17    | 11 |
| Cavin1        | -0.296 | 1     | 0.23  | 3.15E-14    | 11 |
| Gsta1         | 0.634  | 1     | 0.502 | 8.56E-14    | 11 |
| Ifitm3        | -0.692 | 1     | 0.234 | 1.78E-13    | 11 |
| Lbh           | 0.361  | 1     | 0.296 | 1.08E-12    | 11 |
| Tmem213       | -0.399 | 0.984 | 0.236 | 1.45E-12    | 11 |
| Klk1          | -0.375 | 0.968 | 0.228 | 1.41E-11    | 11 |
| Tff2          | -0.797 | 1     | 1     | 1.58E-11    | 11 |
| Mgst3         | 0.505  | 1     | 0.96  | 1.59E-10    | 11 |
| Cfi           | -0.251 | 1     | 0.272 | 1.50E-09    | 11 |
| H2-K1         | 0.313  | 1     | 0.358 | 4.38E-09    | 11 |
| Gm3776        | 0.455  | 1     | 0.73  | 7.25E-08    | 11 |
| Cela1         | -0.704 | 0.413 | 0.422 | 1.45E-07    | 11 |
| Sox9          | -0.513 | 0.873 | 0.198 | 1.79E-07    | 11 |
| Sprr1a        | 0.365  | 1     | 0.36  | 2.13E-07    | 11 |
| Arl14         | 0.302  | 0.952 | 0.37  | 9.89E-07    | 11 |
| Krt19         | 0.520  | 1     | 0.944 | 1.09E-06    | 11 |
| Vsig1         | 0.550  | 0.952 | 0.788 | 1.72E-06    | 11 |
| Fabp5         | 0.640  | 0.984 | 0.552 | 7.29E-06    | 11 |
| Gkn1          | 0.451  | 1     | 0.97  | 8.84E-06    | 11 |
| Chia1         | 0.286  | 0.635 | 0.014 | 2.06E-05    | 11 |
| Gif           | -0.502 | 0.381 | 0.084 | 2.23E-05    | 11 |
| S100a6        | 0.617  | 1     | 0.968 | 3.08E-05    | 11 |
| Gkn2          | 0.440  | 1     | 0.964 | 6.75E-05    | 11 |
| Gsta4         | 0.353  | 1     | 0.918 | 0.000108238 | 11 |
| Hist1h2bc     | 0.507  | 0.968 | 0.474 | 0.000160152 | 11 |
| Sptssb        | 0.448  | 1     | 0.718 | 0.000177385 | 11 |
| Lypd8         | 0.782  | 1     | 0.682 | 0.000201307 | 11 |
| Tff1          | 0.350  | 1     | 0.992 | 0.000555845 | 11 |
| Sox4          | -0.288 | 0.73  | 0.122 | 0.000750394 | 11 |
| Gstp1         | 0.334  | 0.81  | 0.274 | 0.001155096 | 11 |
| Ndrp1         | 0.268  | 1     | 0.448 | 0.001591554 | 11 |
| Tstd1         | -0.475 | 0.444 | 0.222 | 0.003215328 | 11 |
| Ffar4         | 0.256  | 0.397 | 0.032 | 0.003268258 | 11 |



|          |        |       |       |             |    |
|----------|--------|-------|-------|-------------|----|
| Sdcbp2   | 0.344  | 0.952 | 0.488 | 0.003943677 | 11 |
| Lgals9   | 0.544  | 0.952 | 0.506 | 0.006701812 | 11 |
| Sult1b1  | 0.401  | 0.921 | 0.49  | 0.00746676  | 11 |
| Ptgr1    | 0.376  | 0.984 | 0.766 | 0.00836366  | 11 |
| Lmo4     | 0.382  | 0.984 | 0.678 | 0.01150238  | 11 |
| S100a11  | 0.396  | 1     | 0.93  | 0.012541252 | 11 |
| Tagln2   | 0.271  | 1     | 0.92  | 0.023730907 | 11 |
| Clu      | -0.699 | 1     | 0.944 | 0.025169773 | 11 |
| Gsdma2   | 0.475  | 0.889 | 0.506 | 0.026180398 | 11 |
| Cldn7    | -0.541 | 1     | 0.35  | 0.030737008 | 11 |
| Dmbt1    | -0.614 | 1     | 0.792 | 0.032916522 | 11 |
| Idi1     | 0.272  | 0.889 | 0.41  | 0.035928798 | 11 |
| Aldh3a1  | 0.293  | 0.889 | 0.44  | 0.050413641 | 11 |
| Malat1   | -0.619 | 1     | 0.992 | 0.059697049 | 11 |
| Anxa10   | 0.596  | 1     | 0.876 | 0.105753489 | 11 |
| Tmsb10   | 0.314  | 1     | 0.978 | 0.112342795 | 11 |
| Spink4   | -0.553 | 1     | 0.864 | 0.227574514 | 11 |
| Prr13    | 0.320  | 1     | 0.886 | 0.339978673 | 11 |
| Fdps     | 0.300  | 0.952 | 0.574 | 0.416943336 | 11 |
| Wfdc2    | -0.764 | 0.937 | 0.702 | 0.569041075 | 11 |
| Tpm1     | 0.318  | 1     | 0.658 | 0.957253691 | 11 |
| Rflnb    | 0.272  | 0.889 | 0.46  | 1           | 11 |
| Sprr2a3  | 0.626  | 1     | 0.948 | 1           | 11 |
| Hmgb2    | -0.356 | 1     | 0.414 | 1           | 11 |
| Agr2     | -0.412 | 1     | 0.926 | 1           | 11 |
| Hist1h1c | 0.469  | 0.952 | 0.496 | 1           | 11 |
| Klf2     | -0.256 | 0.524 | 0.28  | 1           | 11 |
| Smim24   | -0.436 | 1     | 0.738 | 1           | 11 |
| Mt2      | -0.937 | 0.762 | 0.658 | 1           | 11 |
| Mllt3    | 0.330  | 0.841 | 0.494 | 1           | 11 |
| Pdim1    | -0.278 | 1     | 0.796 | 1           | 11 |
| Rbp1     | -0.781 | 1     | 0.634 | 1           | 11 |
| Ttr      | -0.461 | 0.73  | 0.194 | 1           | 11 |
| Ii33     | 0.335  | 0.444 | 0.042 | 1           | 11 |
| Pigr     | -0.452 | 1     | 0.45  | 1           | 11 |
| mt-Nd3   | -0.394 | 1     | 0.874 | 1           | 11 |
| Mt1      | -0.490 | 1     | 0.972 | 1           | 11 |
| H2afz    | 0.416  | 1     | 0.888 | 1           | 11 |
| Ckmt1    | 0.326  | 1     | 0.842 | 1           | 11 |
| Insig1   | 0.493  | 0.905 | 0.498 | 1           | 11 |
| Nr4a1    | -0.417 | 0.841 | 0.328 | 1           | 11 |
| Dnajib1  | 0.346  | 0.778 | 0.358 | 1           | 11 |
| Ugdh     | 0.263  | 0.968 | 0.79  | 1           | 11 |
| Cotl1    | 0.411  | 1     | 0.81  | 1           | 11 |
| Actb     | 0.494  | 1     | 0.99  | 1           | 11 |
| Gm26917  | -0.669 | 1     | 0.43  | 1           | 11 |
| Gstm1    | -0.254 | 0.921 | 0.886 | 1           | 11 |
| Zfp36    | -0.365 | 0.921 | 0.756 | 1           | 11 |
| Pglyrp1  | -0.526 | 1     | 0.618 | 1           | 11 |
| Cyr61    | -0.487 | 0.921 | 0.396 | 1           | 11 |

|               |        |       |       |          |    |
|---------------|--------|-------|-------|----------|----|
| Hes1          | -0.851 | 1     | 0.642 | 1        | 11 |
| Gfpt1         | -0.595 | 0.984 | 0.43  | 1        | 11 |
| Fcgbp         | -0.941 | 1     | 0.628 | 1        | 11 |
| Pgc           | -0.505 | 0.857 | 0.466 | 1        | 11 |
| Clic1         | 0.260  | 1     | 0.856 | 1        | 11 |
| Plac8         | 0.301  | 1     | 0.936 | 1        | 11 |
| Nkx6-3        | -0.372 | 1     | 0.474 | 1        | 11 |
| Golm1         | -0.484 | 0.889 | 0.544 | 1        | 11 |
| Gkn3          | -2.716 | 1     | 0.548 | 1        | 11 |
| Spp1          | -1.345 | 0.556 | 0.146 | 1        | 11 |
| Clca1         | -0.829 | 1     | 0.524 | 1        | 11 |
| Tm4sf5        | 0.288  | 0.556 | 0.082 | 1        | 11 |
| Fabp2         | -0.301 | 0.81  | 0.536 | 1        | 11 |
| Krt7          | -0.457 | 1     | 0.494 | 1        | 11 |
| Zfp3612       | -0.406 | 0.905 | 0.508 | 1        | 11 |
| Id2           | -0.413 | 1     | 0.594 | 1        | 11 |
| Nkx6-2        | -0.305 | 0.714 | 0.31  | 1        | 11 |
| 9130204L05Rik | 0.629  | 0.524 | 0.066 | 1        | 11 |
| Gsta2         | 0.332  | 0.524 | 0.078 | 1        | 11 |
| Mfge8         | -0.430 | 0.825 | 0.416 | 1        | 11 |
| Gm42418       | -0.469 | 1     | 0.652 | 1        | 11 |
| Mogat1        | 0.370  | 0.524 | 0.068 | 1        | 11 |
| Atp2a3        | -0.385 | 1     | 0.532 | 1        | 11 |
| AY036118      | 0.396  | 0.992 | 0.032 | 2.99E-93 | 12 |
| Chil4         | -0.878 | 1     | 0.098 | 1.95E-59 | 12 |
| Wfdc18        | -0.674 | 0.958 | 0.092 | 8.62E-58 | 12 |
| Reg1          | -0.306 | 0.915 | 0.117 | 6.53E-43 | 12 |
| Gbp4          | -0.309 | 0.992 | 0.165 | 6.36E-36 | 12 |
| Cxcl1         | -0.304 | 1     | 0.174 | 4.38E-34 | 12 |
| Icam1         | -0.276 | 0.856 | 0.133 | 6.86E-34 | 12 |
| Cpn1          | -0.256 | 0.22  | 0.151 | 1.30E-31 | 12 |
| Cym           | -1.797 | 1     | 0.185 | 2.76E-31 | 12 |
| C3            | -0.331 | 0.814 | 0.14  | 1.18E-28 | 12 |
| Isg15         | -0.314 | 1     | 0.201 | 6.89E-28 | 12 |
| Reg3g         | -0.712 | 1     | 0.199 | 6.94E-28 | 12 |
| Scgb2b7       | -0.253 | 0.229 | 0.121 | 2.93E-25 | 12 |
| Edn1          | -0.273 | 1     | 0.22  | 3.97E-24 | 12 |
| Gm3776        | 1.081  | 0.924 | 0.492 | 1.20E-21 | 12 |
| H2-DMb2       | -0.289 | 1     | 0.229 | 1.59E-21 | 12 |
| St3gal4       | -0.325 | 0.983 | 0.224 | 2.47E-21 | 12 |
| Serpina3g     | -0.289 | 0.585 | 0.108 | 4.80E-19 | 12 |
| Loxl2         | -0.335 | 0.737 | 0.082 | 5.41E-19 | 12 |
| Mal           | 0.320  | 1     | 0.293 | 1.54E-18 | 12 |
| Cd74          | -0.789 | 1     | 0.938 | 5.79E-18 | 12 |
| Clca3a2       | -0.393 | 1     | 0.256 | 1.91E-16 | 12 |
| Pdia2         | -0.453 | 0.331 | 0.27  | 5.70E-16 | 12 |
| Gsta4         | 0.615  | 0.992 | 0.879 | 1.63E-15 | 12 |
| Snhg18        | -0.460 | 0.356 | 0.348 | 2.45E-15 | 12 |
| Gkn3          | -1.466 | 1     | 0.268 | 2.70E-15 | 12 |
| Tff1          | 1.111  | 1     | 0.952 | 6.02E-15 | 12 |

|         |        |       |       |             |    |
|---------|--------|-------|-------|-------------|----|
| Psca    | 0.852  | 0.966 | 0.709 | 1.83E-14    | 12 |
| Gstp1   | 0.570  | 0.839 | 0.254 | 2.61E-14    | 12 |
| Lgals2  | 0.564  | 0.992 | 0.856 | 1.32E-13    | 12 |
| Pigr    | -1.002 | 1     | 0.86  | 3.41E-12    | 12 |
| Gkn1    | 1.016  | 0.983 | 0.858 | 1.13E-11    | 12 |
| C4b     | -0.272 | 0.805 | 0.146 | 1.25E-11    | 12 |
| Gkn2    | 1.162  | 0.983 | 0.771 | 1.50E-11    | 12 |
| Creb3l4 | -0.275 | 0.364 | 0.178 | 1.77E-11    | 12 |
| Sprr1a  | -0.513 | 0.983 | 0.293 | 1.27E-10    | 12 |
| Areg    | -0.326 | 0.983 | 0.302 | 2.87E-10    | 12 |
| Lypd8   | 0.540  | 1     | 0.499 | 3.62E-10    | 12 |
| Plk2    | -0.255 | 0.915 | 0.247 | 3.78E-10    | 12 |
| Tst     | 0.469  | 0.966 | 0.556 | 4.45E-10    | 12 |
| Cd59a   | 0.528  | 0.72  | 0.11  | 7.75E-10    | 12 |
| Muc5ac  | 0.843  | 0.78  | 0.24  | 7.96E-10    | 12 |
| Crip1   | 0.410  | 0.992 | 0.979 | 9.04E-10    | 12 |
| Tstd1   | -0.252 | 0.39  | 0.297 | 1.22E-09    | 12 |
| H2-K1   | -0.729 | 1     | 0.952 | 1.56E-09    | 12 |
| Dpcr1   | 0.668  | 0.831 | 0.359 | 2.35E-09    | 12 |
| Gpx2    | -0.717 | 1     | 0.904 | 3.16E-09    | 12 |
| Mgst3   | 0.445  | 1     | 0.954 | 3.39E-09    | 12 |
| Sptssb  | 0.897  | 0.847 | 0.421 | 4.20E-09    | 12 |
| Gm3336  | 0.258  | 0.898 | 0.343 | 7.37E-09    | 12 |
| Rps29   | 0.279  | 1     | 0.998 | 7.52E-09    | 12 |
| Preli2  | 0.292  | 0.856 | 0.268 | 1.54E-08    | 12 |
| A4gnt   | -0.289 | 0.398 | 0.174 | 7.80E-08    | 12 |
| Sult1b1 | 0.496  | 0.856 | 0.407 | 2.60E-07    | 12 |
| Clu     | -0.609 | 0.992 | 0.975 | 5.58E-07    | 12 |
| Gm10260 | 0.331  | 0.983 | 0.751 | 4.85E-06    | 12 |
| Nqo1    | 0.415  | 0.856 | 0.474 | 6.19E-06    | 12 |
| Ethe1   | 0.265  | 1     | 0.499 | 6.22E-06    | 12 |
| Gif     | -0.903 | 0.398 | 0.124 | 8.27E-06    | 12 |
| ligp1   | -0.617 | 1     | 0.339 | 1.04E-05    | 12 |
| Wfdc2   | -0.819 | 0.669 | 0.618 | 1.04E-05    | 12 |
| H2-Ab1  | -0.679 | 1     | 0.872 | 1.05E-05    | 12 |
| Uhrf1   | -0.375 | 0.983 | 0.35  | 2.24E-05    | 12 |
| Psmb8   | -0.378 | 1     | 0.856 | 2.73E-05    | 12 |
| Zfp36   | -0.665 | 1     | 0.787 | 4.98E-05    | 12 |
| Pla2g10 | 0.266  | 0.958 | 0.533 | 6.94E-05    | 12 |
| Gbp2b   | -0.453 | 1     | 0.357 | 0.000130156 | 12 |
| Atp5k   | 0.310  | 1     | 0.979 | 0.000163781 | 12 |
| Degs2   | 0.332  | 0.788 | 0.256 | 0.000184039 | 12 |
| Ugdh    | 0.302  | 0.89  | 0.506 | 0.000360025 | 12 |
| Gm26532 | -0.282 | 0.89  | 0.293 | 0.000405962 | 12 |
| Irf1    | -0.408 | 1     | 0.359 | 0.000459813 | 12 |
| Gstm1   | 0.488  | 0.932 | 0.757 | 0.00049483  | 12 |
| Nfe2l2  | 0.319  | 0.975 | 0.792 | 0.000564713 | 12 |
| H1fx    | -0.252 | 0.966 | 0.364 | 0.000673483 | 12 |
| Ier3    | -0.319 | 1     | 0.364 | 0.00068091  | 12 |
| H2-Aa   | -0.518 | 1     | 0.826 | 0.000682811 | 12 |

|               |        |       |       |             |    |
|---------------|--------|-------|-------|-------------|----|
| Vsig1         | 0.334  | 0.958 | 0.838 | 0.000834566 | 12 |
| Smim6         | 0.374  | 0.958 | 0.732 | 0.000928886 | 12 |
| Ifi47         | -0.341 | 1     | 0.362 | 0.000973236 | 12 |
| Klf4          | 0.367  | 0.992 | 0.65  | 0.000992929 | 12 |
| H2-Eb1        | -0.640 | 1     | 0.835 | 0.001362957 | 12 |
| Mfge8         | -0.540 | 0.737 | 0.634 | 0.001477092 | 12 |
| Malat1        | -0.474 | 1     | 0.998 | 0.00151805  | 12 |
| 2200002D01Rik | 0.312  | 1     | 0.753 | 0.001599992 | 12 |
| Sox4          | -0.340 | 0.534 | 0.38  | 0.002211702 | 12 |
| Rbp2          | 0.377  | 0.881 | 0.43  | 0.002686473 | 12 |
| Prdx1         | 0.321  | 1     | 0.993 | 0.00450065  | 12 |
| Sult1d1       | 0.552  | 0.788 | 0.384 | 0.004659246 | 12 |
| Spata7        | -0.476 | 0.458 | 0.183 | 0.005600808 | 12 |
| S100a6        | 0.521  | 1     | 0.831 | 0.008276648 | 12 |
| Krt19         | 0.386  | 1     | 0.924 | 0.008963589 | 12 |
| AW112010      | -0.939 | 1     | 0.856 | 0.012143222 | 12 |
| 2210404E10Rik | -0.384 | 0.568 | 0.412 | 0.013497432 | 12 |
| Pga5          | -0.876 | 0.602 | 0.449 | 0.016816417 | 12 |
| Hist1h2ap     | 0.919  | 0.78  | 0.286 | 0.019353722 | 12 |
| Lmo4          | 0.292  | 0.915 | 0.648 | 0.019690914 | 12 |
| Ifi27         | -0.442 | 0.958 | 0.357 | 0.022135799 | 12 |
| Ptgr1         | 0.381  | 0.839 | 0.636 | 0.030838138 | 12 |
| mt-Nd3        | -0.340 | 0.992 | 0.858 | 0.033706148 | 12 |
| 2210407C18Rik | 0.899  | 1     | 0.865 | 0.053168105 | 12 |
| Tubb5         | -0.292 | 0.983 | 0.915 | 0.067489596 | 12 |
| Gsta1         | 0.720  | 0.686 | 0.236 | 0.076074036 | 12 |
| Clps          | -0.525 | 1     | 0.714 | 0.080476538 | 12 |
| Far1          | 0.292  | 0.907 | 0.515 | 0.091826387 | 12 |
| Esd           | 0.276  | 0.958 | 0.725 | 0.115047703 | 12 |
| Il18          | 0.276  | 0.737 | 0.286 | 0.116161668 | 12 |
| Hbegf         | -0.273 | 0.941 | 0.373 | 0.141658077 | 12 |
| Rpl23a        | 0.254  | 0.992 | 0.959 | 0.155441582 | 12 |
| Dmbt1         | -0.653 | 1     | 0.771 | 0.160672259 | 12 |
| Lgals9        | 0.267  | 0.992 | 0.579 | 0.176745103 | 12 |
| Mllt3         | 0.284  | 0.729 | 0.24  | 0.222049522 | 12 |
| Gsta3         | 0.422  | 0.669 | 0.178 | 0.476777703 | 12 |
| Igtp          | -0.325 | 1     | 0.421 | 0.522375512 | 12 |
| Plac8         | 0.276  | 1     | 0.924 | 1           | 12 |
| Tmed3         | -0.265 | 0.627 | 0.474 | 1           | 12 |
| Ghrl          | 0.427  | 0.661 | 0.135 | 1           | 12 |
| Ly6a          | -0.918 | 1     | 0.474 | 1           | 12 |
| Gfpt1         | -0.461 | 1     | 0.696 | 1           | 12 |
| Gadd45g       | -0.339 | 1     | 0.46  | 1           | 12 |
| Racgap1       | -0.289 | 0.966 | 0.432 | 1           | 12 |
| Lgr4          | 0.254  | 0.737 | 0.336 | 1           | 12 |
| Atf3          | -0.451 | 1     | 0.7   | 1           | 12 |
| Selenom       | -0.252 | 0.508 | 0.158 | 1           | 12 |
| Akr1c14       | 0.388  | 0.644 | 0.169 | 1           | 12 |
| Ctse          | -0.265 | 0.975 | 0.856 | 1           | 12 |
| Incenp        | -0.317 | 0.898 | 0.398 | 1           | 12 |

|               |        |       |       |          |    |
|---------------|--------|-------|-------|----------|----|
| Stmn1         | 0.254  | 0.983 | 0.822 | 1        | 12 |
| Arl6ip1       | 0.418  | 0.949 | 0.73  | 1        | 12 |
| Adh7          | 0.339  | 0.576 | 0.048 | 1        | 12 |
| Gsta2         | 0.335  | 0.576 | 0.053 | 1        | 12 |
| Muc6          | -1.998 | 0.983 | 0.439 | 1        | 12 |
| H2-DMb1       | -0.540 | 1     | 0.579 | 1        | 12 |
| S100a1        | -0.487 | 0.992 | 0.677 | 1        | 12 |
| Aldh3a1       | 0.254  | 0.61  | 0.137 | 1        | 12 |
| Dusp1         | -0.514 | 1     | 0.652 | 1        | 12 |
| H2-DMa        | -0.414 | 1     | 0.632 | 1        | 12 |
| Chia1         | 0.324  | 0.551 | 0.03  | 1        | 12 |
| Bpifb1        | -2.083 | 1     | 0.558 | 1        | 12 |
| Spink4        | -0.653 | 0.78  | 0.579 | 1        | 12 |
| Cfi           | -0.484 | 0.763 | 0.444 | 1        | 12 |
| Cyr61         | -0.436 | 0.958 | 0.487 | 1        | 12 |
| Top2a         | -0.270 | 0.983 | 0.67  | 1        | 12 |
| Ifitm3        | -0.669 | 1     | 0.49  | 1        | 12 |
| Actb          | 0.360  | 0.992 | 0.991 | 1        | 12 |
| Wars          | -0.356 | 1     | 0.661 | 1        | 12 |
| AA467197      | -0.453 | 1     | 0.606 | 1        | 12 |
| Hes1          | -0.402 | 0.958 | 0.627 | 1        | 12 |
| Lig1          | -0.362 | 0.975 | 0.533 | 1        | 12 |
| Cenpw         | -0.266 | 0.915 | 0.499 | 1        | 12 |
| Me2           | 0.274  | 0.576 | 0.174 | 1        | 12 |
| Chka          | -0.286 | 0.839 | 0.469 | 1        | 12 |
| Pglyrp1       | -0.419 | 0.975 | 0.522 | 1        | 12 |
| Ly6e          | -0.420 | 1     | 0.526 | 1        | 12 |
| Nfkbia        | -0.405 | 0.992 | 0.568 | 1        | 12 |
| Cyba          | -0.372 | 1     | 0.577 | 1        | 12 |
| Nr4a1         | -0.463 | 0.703 | 0.286 | 1        | 12 |
| Pgc           | -0.944 | 0.975 | 0.838 | 1        | 12 |
| Agr2          | -0.376 | 0.966 | 0.879 | 1        | 12 |
| Golm1         | -0.328 | 0.856 | 0.485 | 1        | 12 |
| Ubd           | -1.318 | 1     | 0.508 | 1        | 12 |
| Gbp7          | -0.259 | 0.99  | 0.023 | 8.25E-77 | 13 |
| Ikzf2         | -0.350 | 0.98  | 0.023 | 4.55E-76 | 13 |
| Irf8          | -0.329 | 0.98  | 0.028 | 1.77E-74 | 13 |
| 2210404E10Rik | -0.274 | 1     | 0.037 | 5.29E-74 | 13 |
| Jchain        | -0.288 | 0.963 | 0.028 | 2.93E-72 | 13 |
| Timp2         | -0.300 | 0.953 | 0.023 | 7.11E-72 | 13 |
| Reg3g         | -0.337 | 0.97  | 0.032 | 1.38E-71 | 13 |
| Ifi47         | -0.285 | 1     | 0.046 | 6.94E-71 | 13 |
| H2-DMb1       | -0.285 | 1     | 0.046 | 6.94E-71 | 13 |
| Ptprc         | -0.460 | 1     | 0.046 | 6.94E-71 | 13 |
| Gbp2b         | -0.474 | 1     | 0.046 | 6.94E-71 | 13 |
| Mxd1          | -0.389 | 0.99  | 0.041 | 1.50E-70 | 13 |
| Cxcl9         | -0.389 | 0.95  | 0.037 | 1.72E-67 | 13 |
| Lgr4          | -0.315 | 0.997 | 0.06  | 1.80E-65 | 13 |
| Papss2        | -0.376 | 0.997 | 0.06  | 2.01E-65 | 13 |
| Serpinb9      | -0.578 | 1     | 0.065 | 6.78E-65 | 13 |

|               |        |       |       |          |    |
|---------------|--------|-------|-------|----------|----|
| Anxa3         | -0.250 | 0.947 | 0.028 | 4.31E-63 | 13 |
| Arhgdib       | -0.291 | 0.887 | 0.028 | 1.47E-62 | 13 |
| Irf1          | -0.516 | 0.98  | 0.055 | 4.44E-62 | 13 |
| Chil4         | -0.314 | 0.927 | 0.046 | 9.64E-62 | 13 |
| Irgm1         | -0.479 | 1     | 0.078 | 1.49E-60 | 13 |
| Cxcr4         | -0.450 | 0.883 | 0.037 | 2.38E-59 | 13 |
| Clca3a2       | -0.472 | 0.893 | 0.041 | 3.85E-59 | 13 |
| Cd52          | -0.511 | 0.95  | 0.065 | 7.26E-59 | 13 |
| Art2b         | -0.345 | 0.92  | 0.055 | 3.99E-58 | 13 |
| Cyba          | -0.451 | 0.99  | 0.078 | 5.79E-58 | 13 |
| Iigp1         | -0.480 | 1     | 0.088 | 9.20E-58 | 13 |
| Serpina3g     | -0.572 | 0.927 | 0.06  | 1.57E-57 | 13 |
| Wars          | -0.618 | 0.997 | 0.088 | 5.75E-57 | 13 |
| Pcolce        | -0.312 | 0.873 | 0.041 | 7.64E-57 | 13 |
| Plet1         | 0.429  | 0.927 | 0.023 | 8.53E-57 | 13 |
| Hmgb2         | -0.354 | 1     | 0.092 | 8.95E-57 | 13 |
| Sox9          | -0.365 | 1     | 0.092 | 9.61E-57 | 13 |
| H2-DMb2       | -0.645 | 1     | 0.092 | 2.15E-56 | 13 |
| Ebf1          | -0.257 | 0.81  | 0.018 | 2.56E-56 | 13 |
| Hamp          | -0.403 | 0.9   | 0.051 | 3.70E-56 | 13 |
| Mcpt1         | -0.664 | 0.9   | 0.055 | 7.88E-56 | 13 |
| Umod          | -0.795 | 0.993 | 0.092 | 1.22E-55 | 13 |
| Igha          | -0.565 | 1     | 0.097 | 4.77E-55 | 13 |
| H2-DMa        | -0.543 | 1     | 0.097 | 4.82E-55 | 13 |
| Idi1          | -0.259 | 0.987 | 0.088 | 9.60E-55 | 13 |
| Furin         | 0.428  | 0.993 | 0.101 | 1.33E-54 | 13 |
| Sprr2a1       | -0.625 | 0.92  | 0.069 | 4.19E-54 | 13 |
| Igkc          | -0.430 | 1     | 0.101 | 1.04E-53 | 13 |
| Mt2           | -0.441 | 0.993 | 0.097 | 1.17E-53 | 13 |
| 2200002D01Rik | -0.448 | 0.963 | 0.069 | 1.46E-53 | 13 |
| Foxq1         | -0.421 | 1     | 0.106 | 1.41E-52 | 13 |
| Igtp          | -0.634 | 1     | 0.106 | 2.15E-52 | 13 |
| Hist1h2ap     | -0.537 | 0.89  | 0.069 | 8.17E-51 | 13 |
| Pdia2         | -0.292 | 1     | 0.115 | 1.84E-50 | 13 |
| Far1          | -0.517 | 1     | 0.115 | 3.86E-50 | 13 |
| Wfdc2         | -0.334 | 0.93  | 0.051 | 5.09E-50 | 13 |
| Gkn3          | -0.557 | 1     | 0.115 | 6.50E-50 | 13 |
| Icam1         | -0.270 | 0.813 | 0.023 | 9.19E-50 | 13 |
| Rgs5          | -0.566 | 0.83  | 0.051 | 1.80E-49 | 13 |
| Gm20400       | 0.450  | 0.123 | 0.005 | 1.38E-48 | 13 |
| Emp1          | -0.377 | 0.93  | 0.092 | 1.94E-48 | 13 |
| Ppargc1a      | -0.309 | 0.927 | 0.055 | 5.29E-48 | 13 |
| Mlph          | -0.346 | 0.797 | 0.032 | 3.92E-47 | 13 |
| Kcnj16        | -0.263 | 0.963 | 0.115 | 7.59E-47 | 13 |
| Unc93b1       | -0.270 | 0.893 | 0.028 | 1.93E-46 | 13 |
| Hist1h1e      | -0.327 | 0.907 | 0.041 | 1.96E-46 | 13 |
| Fgfbp1        | -0.263 | 0.92  | 0.055 | 2.20E-46 | 13 |
| Clca1         | -1.323 | 0.88  | 0.088 | 7.20E-45 | 13 |
| Klf4          | -0.881 | 0.997 | 0.134 | 3.37E-44 | 13 |
| Oit1          | -0.424 | 0.953 | 0.097 | 4.33E-44 | 13 |

|           |        |       |       |          |    |
|-----------|--------|-------|-------|----------|----|
| Gbp2      | -0.337 | 0.73  | 0.032 | 5.68E-44 | 13 |
| Ly6d      | -0.774 | 0.973 | 0.129 | 1.51E-43 | 13 |
| Rac2      | -0.380 | 0.723 | 0.032 | 2.62E-43 | 13 |
| Sprr1a    | -0.935 | 0.943 | 0.12  | 6.95E-43 | 13 |
| Pglyrp1   | -0.673 | 0.923 | 0.078 | 1.67E-41 | 13 |
| Muc4      | -0.287 | 0.68  | 0.023 | 2.28E-41 | 13 |
| Cebpb     | -0.272 | 0.86  | 0.032 | 2.73E-41 | 13 |
| Krt20     | -0.276 | 0.66  | 0.018 | 1.40E-40 | 13 |
| Plac8     | -0.750 | 1     | 0.152 | 1.48E-40 | 13 |
| Irf7      | -0.423 | 0.743 | 0.037 | 4.76E-40 | 13 |
| Srgn      | -0.358 | 0.723 | 0.023 | 2.40E-39 | 13 |
| Rbp2      | -0.281 | 0.89  | 0.055 | 2.58E-39 | 13 |
| Hes1      | -0.317 | 0.863 | 0.041 | 9.61E-39 | 13 |
| Pim1      | -0.252 | 0.797 | 0.023 | 1.31E-38 | 13 |
| Sox4      | -0.651 | 0.923 | 0.092 | 2.46E-38 | 13 |
| Ifitm3    | -0.604 | 0.99  | 0.152 | 2.59E-38 | 13 |
| Gfpt1     | -0.828 | 1     | 0.161 | 3.37E-38 | 13 |
| H2-T23    | -0.815 | 1     | 0.161 | 6.16E-38 | 13 |
| Rflnb     | -0.401 | 0.907 | 0.083 | 5.23E-37 | 13 |
| Lypd8     | -0.663 | 0.977 | 0.147 | 5.83E-37 | 13 |
| Cd69      | -0.303 | 0.613 | 0.023 | 3.91E-35 | 13 |
| Dut       | 0.294  | 0.837 | 0.018 | 4.42E-35 | 13 |
| Tpsab1    | -0.415 | 0.797 | 0.028 | 5.32E-35 | 13 |
| Pcna      | -0.281 | 0.853 | 0.037 | 5.60E-35 | 13 |
| Pthlh     | 0.531  | 0.15  | 0.014 | 7.28E-35 | 13 |
| Pgd       | -0.263 | 0.887 | 0.074 | 1.06E-34 | 13 |
| Hspa1a    | -0.557 | 1     | 0.184 | 1.34E-33 | 13 |
| Muc5ac    | -0.826 | 0.98  | 0.166 | 1.70E-33 | 13 |
| Pclaf     | -0.374 | 0.853 | 0.051 | 1.97E-33 | 13 |
| Gm3776    | -0.456 | 0.857 | 0.051 | 5.84E-33 | 13 |
| Slc9a3    | -0.883 | 0.903 | 0.147 | 8.70E-33 | 13 |
| Rfk       | 0.300  | 0.2   | 0.018 | 5.89E-31 | 13 |
| Ubd       | -0.912 | 1     | 0.194 | 1.31E-30 | 13 |
| Hmgcs1    | -0.256 | 0.933 | 0.147 | 8.45E-30 | 13 |
| Nupr1     | 0.256  | 0.213 | 0.055 | 4.88E-29 | 13 |
| AA467197  | -0.255 | 0.53  | 0.018 | 5.85E-29 | 13 |
| Abhd2     | -0.424 | 0.93  | 0.147 | 8.15E-29 | 13 |
| AW112010  | -0.644 | 1     | 0.207 | 7.83E-28 | 13 |
| Trp53inp1 | -0.279 | 0.633 | 0.032 | 8.59E-28 | 13 |
| Ly6e      | -0.534 | 1     | 0.217 | 7.08E-27 | 13 |
| Hspa1b    | -0.792 | 0.98  | 0.198 | 7.38E-27 | 13 |
| Lgals3    | -0.561 | 0.753 | 0.069 | 1.08E-26 | 13 |
| Bst2      | -0.393 | 0.88  | 0.111 | 1.38E-26 | 13 |
| Cotl1     | -0.260 | 0.823 | 0.051 | 2.40E-26 | 13 |
| Esrrg     | -0.646 | 0.987 | 0.212 | 8.49E-26 | 13 |
| Ifrd1     | -0.465 | 0.873 | 0.111 | 2.79E-25 | 13 |
| Cd74      | -0.673 | 1     | 0.876 | 1.27E-24 | 13 |
| Ugdh      | -0.381 | 0.26  | 0.115 | 3.27E-23 | 13 |
| Apoa4     | -0.326 | 0.257 | 0.092 | 5.78E-23 | 13 |
| Gm3839    | 0.433  | 0.24  | 0.014 | 6.94E-23 | 13 |

|            |        |       |       |             |    |
|------------|--------|-------|-------|-------------|----|
| Rpl23a     | -0.361 | 0.993 | 0.244 | 1.41E-22    | 13 |
| Car8       | 0.501  | 0.243 | 0.018 | 1.90E-22    | 13 |
| Spink4     | -0.773 | 1     | 0.249 | 3.64E-21    | 13 |
| Dmbt1      | -0.834 | 0.857 | 0.12  | 8.10E-21    | 13 |
| Tubb4b     | 0.308  | 0.833 | 0.111 | 3.05E-20    | 13 |
| Hist2h2aa1 | -0.302 | 0.8   | 0.065 | 3.80E-20    | 13 |
| Neat1      | -0.598 | 1     | 0.253 | 4.97E-20    | 13 |
| Gsto1      | -0.596 | 0.953 | 0.226 | 1.29E-19    | 13 |
| Cyp2s1     | -0.601 | 0.85  | 0.124 | 2.17E-19    | 13 |
| Hist1h2bc  | 0.598  | 0.273 | 0.06  | 3.68E-18    | 13 |
| Id2        | -0.260 | 1     | 0.286 | 9.31E-17    | 13 |
| Rps2       | -0.333 | 1     | 0.286 | 1.32E-16    | 13 |
| Fabp1      | 0.435  | 0.703 | 0.014 | 1.66E-16    | 13 |
| Psmb8      | -0.858 | 1     | 0.272 | 2.83E-16    | 13 |
| S100a11    | -0.696 | 1     | 0.276 | 3.24E-16    | 13 |
| Duox2      | -0.256 | 0.36  | 0.018 | 3.58E-16    | 13 |
| Smim6      | -0.496 | 0.8   | 0.101 | 3.23E-15    | 13 |
| Pga5       | -0.424 | 0.787 | 0.088 | 4.08E-15    | 13 |
| Agr2       | -0.419 | 0.987 | 0.286 | 7.07E-15    | 13 |
| Pcp4l1     | 0.727  | 0.293 | 0.014 | 4.92E-14    | 13 |
| Gstm1      | -0.427 | 0.8   | 0.12  | 2.88E-13    | 13 |
| Rpl17      | -0.340 | 0.98  | 0.304 | 3.07E-13    | 13 |
| Dpcr1      | -0.310 | 0.313 | 0.06  | 5.21E-13    | 13 |
| Atf3       | -0.359 | 0.827 | 0.157 | 1.38E-12    | 13 |
| Msmo1      | -0.309 | 0.743 | 0.065 | 7.93E-12    | 13 |
| H2-K1      | -0.743 | 1     | 0.747 | 8.56E-12    | 13 |
| Anxa2      | -0.369 | 0.713 | 0.051 | 1.30E-11    | 13 |
| S100a6     | -1.710 | 1     | 0.313 | 4.36E-11    | 13 |
| Tagln2     | -0.398 | 0.383 | 0.221 | 1.26E-10    | 13 |
| Malat1     | 0.582  | 1     | 0.848 | 3.21E-10    | 13 |
| Pigr       | -1.047 | 1     | 0.313 | 4.40E-10    | 13 |
| Mcpt2      | -0.306 | 0.56  | 0.018 | 6.50E-10    | 13 |
| Gpx2       | -0.606 | 0.37  | 0.147 | 1.00E-09    | 13 |
| Ifi2712b   | 0.329  | 0.363 | 0.152 | 3.96E-09    | 13 |
| Fa2h       | 0.621  | 0.34  | 0.06  | 4.73E-09    | 13 |
| Krt19      | -0.492 | 0.99  | 0.35  | 1.14E-08    | 13 |
| Preli2     | 0.543  | 0.35  | 0.028 | 5.51E-07    | 13 |
| Phlda1     | -0.378 | 0.42  | 0.207 | 5.57E-07    | 13 |
| Kcne2      | 0.343  | 0.373 | 0.111 | 5.86E-07    | 13 |
| Clu        | -0.810 | 0.997 | 0.378 | 1.64E-05    | 13 |
| Sst        | -0.451 | 0.683 | 0.065 | 4.36E-05    | 13 |
| Bex2       | 0.263  | 0.37  | 0.023 | 5.89E-05    | 13 |
| Muc6       | -1.081 | 1     | 0.364 | 6.39E-05    | 13 |
| mt-Nd3     | -0.909 | 1     | 0.369 | 0.00011579  | 13 |
| Krt8       | -0.661 | 0.623 | 0.475 | 0.001224678 | 13 |
| Fabp3      | -0.285 | 0.907 | 0.336 | 0.00372701  | 13 |
| Ckb        | -0.324 | 0.777 | 0.217 | 0.008337111 | 13 |
| Bpifb1     | -0.887 | 1     | 0.396 | 0.008791293 | 13 |
| Cox7a1     | -0.423 | 0.807 | 0.263 | 0.00939866  | 13 |
| Clic3      | -0.317 | 0.603 | 0.032 | 0.012471542 | 13 |



|           |        |       |       |             |    |
|-----------|--------|-------|-------|-------------|----|
| Gsta4     | -0.478 | 0.493 | 0.217 | 0.085105704 | 13 |
| Id3       | 0.291  | 0.723 | 0.203 | 0.086297838 | 13 |
| H2-Eb1    | -0.943 | 1     | 0.406 | 0.206869148 | 13 |
| Rps15     | -0.307 | 1     | 0.452 | 0.212530458 | 13 |
| Tff2      | -0.268 | 1     | 0.47  | 0.319095503 | 13 |
| H2-Ab1    | -1.012 | 1     | 0.604 | 0.589079375 | 13 |
| Crip1     | -0.623 | 1     | 0.433 | 0.734938393 | 13 |
| H2-Aa     | -0.586 | 1     | 0.636 | 0.763354394 | 13 |
| Sprr2a3   | -1.335 | 1     | 0.433 | 0.831195873 | 13 |
| Actb      | 0.341  | 0.98  | 0.673 | 1           | 13 |
| Tff1      | -0.587 | 0.977 | 0.839 | 1           | 13 |
| Hamp2     | -0.439 | 0.713 | 0.484 | 1           | 13 |
| Me1       | -0.477 | 0.443 | 0.046 | 1           | 13 |
| Psca      | -0.259 | 1     | 0.889 | 1           | 13 |
| Sult1c2   | 0.340  | 0.473 | 0.097 | 1           | 13 |
| Apoa1     | -0.412 | 0.953 | 0.705 | 1           | 13 |
| Rps29     | 0.436  | 1     | 0.894 | 1           | 13 |
| Ly6a      | -1.011 | 1     | 0.447 | 1           | 13 |
| Chia1     | 0.341  | 0.867 | 0.465 | 1           | 13 |
| Lmo4      | -0.303 | 0.493 | 0.092 | 1           | 13 |
| Tst       | -0.333 | 0.483 | 0.065 | 1           | 13 |
| Mt1       | 0.256  | 0.987 | 0.705 | 1           | 13 |
| Atp4a     | 0.506  | 1     | 0.899 | 1           | 13 |
| Gkn2      | -0.431 | 0.8   | 0.53  | 1           | 13 |
| Lars2     | -0.408 | 1     | 0.525 | 1           | 13 |
| Atp5k     | 0.255  | 0.997 | 0.608 | 1           | 13 |
| Cym       | -1.244 | 1     | 0.488 | 1           | 13 |
| Zfp36     | -0.344 | 0.623 | 0.171 | 1           | 13 |
| Pla2g1b   | 0.625  | 1     | 0.977 | 1           | 13 |
| Cd36      | 0.297  | 0.467 | 0.037 | 1           | 13 |
| Clps      | 0.584  | 1     | 0.977 | 1           | 13 |
| Pgc       | 0.266  | 1     | 0.972 | 1           | 13 |
| Anxa10    | -0.323 | 0.68  | 0.304 | 1           | 13 |
| Gm42418   | 0.822  | 1     | 0.986 | 1           | 13 |
| ApoE      | -0.345 | 0.487 | 0.046 | 1           | 13 |
| Prnp      | 0.668  | 0.513 | 0.037 | 1           | 13 |
| Edem1     | -0.269 | 0.54  | 0.074 | 1           | 13 |
| Tkt       | 0.331  | 0.547 | 0.101 | 1           | 13 |
| Pla2g10   | 0.279  | 1     | 0     | 1.49E-109   | 14 |
| Serpina3i | 0.323  | 0.941 | 0     | 8.00E-103   | 14 |
| Ccl21a    | 0.869  | 1     | 0.002 | 9.41E-103   | 14 |
| Igkv5-39  | 0.956  | 1     | 0.008 | 3.11E-86    | 14 |
| Cyp4v3    | 0.551  | 1     | 0.01  | 9.96E-82    | 14 |
| Sult1d1   | 0.658  | 1     | 0.012 | 2.85E-78    | 14 |
| Igsf9     | 0.472  | 1     | 0.014 | 7.64E-74    | 14 |
| Adam19    | 0.927  | 1     | 0.016 | 1.08E-70    | 14 |
| Slfn5     | 0.373  | 1     | 0.016 | 1.62E-70    | 14 |
| Usp50     | 0.269  | 1     | 0.018 | 1.92E-67    | 14 |
| Rgs10     | 0.485  | 1     | 0.02  | 2.55E-65    | 14 |
| Ccdc34    | 0.987  | 1     | 0.02  | 4.67E-65    | 14 |

|           |        |       |       |          |    |
|-----------|--------|-------|-------|----------|----|
| Wfdc21    | 0.584  | 0.118 | 0     | 1.77E-63 | 14 |
| Idi1      | 0.381  | 1     | 0.022 | 3.81E-62 | 14 |
| Pgd       | 0.253  | 1     | 0.022 | 1.13E-61 | 14 |
| Mfge8     | -0.254 | 1     | 0.022 | 1.87E-61 | 14 |
| Ighv3-2   | 1.226  | 0.118 | 0.002 | 4.97E-60 | 14 |
| Wfdc2     | -0.250 | 1     | 0.024 | 6.85E-59 | 14 |
| Foxq1     | -0.259 | 1     | 0.024 | 6.85E-59 | 14 |
| Plk2      | -0.265 | 1     | 0.024 | 6.85E-59 | 14 |
| Ckmt1     | -0.273 | 1     | 0.024 | 6.85E-59 | 14 |
| Gbp2b     | -0.274 | 1     | 0.024 | 6.85E-59 | 14 |
| Dbn2d2    | 0.604  | 0.118 | 0.004 | 6.04E-57 | 14 |
| Plbd1     | 0.610  | 1     | 0.028 | 2.11E-54 | 14 |
| Oit1      | -0.261 | 1     | 0.028 | 2.92E-54 | 14 |
| Hist3h2ba | 0.472  | 0.118 | 0.006 | 3.91E-54 | 14 |
| Igkv1-88  | 3.249  | 0.118 | 0.002 | 6.90E-54 | 14 |
| Evi2a     | 0.454  | 1     | 0.03  | 1.84E-52 | 14 |
| Sox9      | -0.281 | 1     | 0.032 | 3.42E-50 | 14 |
| Adm       | 0.608  | 0.882 | 0.008 | 1.09E-49 | 14 |
| Tyms      | 0.285  | 0.118 | 0.01  | 2.10E-49 | 14 |
| Gadd45g   | 0.338  | 1     | 0.034 | 1.14E-48 | 14 |
| Id1       | -0.315 | 1     | 0.034 | 2.45E-48 | 14 |
| Tyropb    | 0.695  | 1     | 0.036 | 6.17E-47 | 14 |
| BC035044  | 0.651  | 0.882 | 0.026 | 6.62E-47 | 14 |
| Naaa      | -0.387 | 0.118 | 0.014 | 1.40E-45 | 14 |
| Lypd8     | 0.726  | 1     | 0.038 | 2.27E-45 | 14 |
| Igkv6-32  | 2.072  | 0.118 | 0.014 | 3.13E-45 | 14 |
| Mllt3     | -0.274 | 1     | 0.038 | 6.14E-45 | 14 |
| Trp53inp1 | -0.450 | 1     | 0.038 | 6.14E-45 | 14 |
| Pltp      | 0.513  | 0.118 | 0.01  | 6.16E-44 | 14 |
| Ifi47     | 0.430  | 1     | 0.04  | 2.12E-43 | 14 |
| Abhd2     | -0.260 | 1     | 0.04  | 2.24E-43 | 14 |
| Nr4a2     | -0.295 | 0.941 | 0.026 | 2.56E-43 | 14 |
| Lig1      | 0.443  | 0.882 | 0.014 | 2.02E-42 | 14 |
| Serpina3g | -0.406 | 1     | 0.043 | 6.75E-42 | 14 |
| Trbc1     | -0.373 | 1     | 0.043 | 6.75E-42 | 14 |
| Ifitm3    | -0.377 | 1     | 0.043 | 6.75E-42 | 14 |
| Hist1h2bc | -0.295 | 0.118 | 0.02  | 9.41E-41 | 14 |
| Tmed6     | 0.420  | 0.176 | 0.004 | 1.80E-40 | 14 |
| Agpat2    | -0.403 | 0.118 | 0.022 | 2.25E-39 | 14 |
| Maff      | -0.383 | 0.118 | 0.022 | 2.39E-39 | 14 |
| Trbv1     | -0.304 | 0.882 | 0.034 | 3.77E-39 | 14 |
| Hist1h2ap | -0.305 | 0.941 | 0.04  | 4.80E-39 | 14 |
| Lmn1b1    | -0.292 | 0.941 | 0.034 | 6.57E-37 | 14 |
| Cplx2     | -0.328 | 0.176 | 0.008 | 8.66E-37 | 14 |
| Klf4      | -0.449 | 1     | 0.051 | 1.10E-36 | 14 |
| Lgals9    | 0.366  | 1     | 0.053 | 6.25E-36 | 14 |
| Spink4    | -0.531 | 1     | 0.053 | 1.56E-35 | 14 |
| Tmem176b  | -0.381 | 0.176 | 0.01  | 3.37E-35 | 14 |
| Anpep     | -0.357 | 0.176 | 0.012 | 9.54E-34 | 14 |
| Csf2ra    | -0.306 | 0.176 | 0.014 | 2.04E-32 | 14 |

|               |        |       |       |          |    |
|---------------|--------|-------|-------|----------|----|
| S100a4        | -0.491 | 0.176 | 0.016 | 3.42E-31 | 14 |
| Cd300lf       | 0.291  | 1     | 0.063 | 9.18E-31 | 14 |
| Jchain        | 0.406  | 1     | 0.065 | 3.77E-30 | 14 |
| Hist1h2ae     | -0.386 | 0.176 | 0.018 | 4.60E-30 | 14 |
| Tnfrsf18      | -0.470 | 0.176 | 0.018 | 4.60E-30 | 14 |
| Il18          | -0.407 | 0.176 | 0.018 | 4.86E-30 | 14 |
| Epsti1        | 0.593  | 1     | 0.067 | 1.16E-29 | 14 |
| Rdx           | -0.257 | 0.118 | 0.043 | 1.50E-29 | 14 |
| Gkn3          | -0.589 | 1     | 0.067 | 9.04E-29 | 14 |
| Ubd           | -0.570 | 1     | 0.067 | 9.04E-29 | 14 |
| Edem1         | 0.527  | 1     | 0.069 | 1.51E-28 | 14 |
| Abi3          | 0.387  | 1     | 0.069 | 1.97E-28 | 14 |
| Hhex          | -0.442 | 0.118 | 0.047 | 3.35E-28 | 14 |
| Hs3st1        | -0.333 | 0.882 | 0.032 | 4.68E-28 | 14 |
| Gm3839        | 0.747  | 0.235 | 0.002 | 5.40E-28 | 14 |
| Nr4a3         | -0.629 | 1     | 0.069 | 5.89E-28 | 14 |
| Id2           | -0.607 | 1     | 0.071 | 3.57E-27 | 14 |
| Pdlim1        | 0.329  | 0.176 | 0.024 | 7.86E-27 | 14 |
| Apobec1       | -0.657 | 0.118 | 0.053 | 2.16E-26 | 14 |
| Vsig1         | -0.257 | 0.118 | 0.053 | 2.53E-26 | 14 |
| Tipin         | -0.324 | 0.176 | 0.026 | 2.79E-26 | 14 |
| Kctd12        | 0.479  | 1     | 0.075 | 5.67E-26 | 14 |
| Iglv1         | 0.492  | 0.176 | 0.028 | 4.41E-25 | 14 |
| Pga5          | -0.568 | 0.176 | 0.03  | 8.96E-25 | 14 |
| Lgals3        | -0.575 | 0.176 | 0.03  | 9.36E-25 | 14 |
| Krt19         | -0.556 | 1     | 0.079 | 2.52E-24 | 14 |
| Lck           | 0.827  | 1     | 0.083 | 2.72E-24 | 14 |
| Apbb1ip       | 1.166  | 1     | 0.093 | 5.61E-23 | 14 |
| Preli2        | 0.360  | 0.176 | 0.036 | 2.25E-22 | 14 |
| Cited2        | -0.371 | 0.882 | 0.045 | 2.84E-22 | 14 |
| Ppt1          | -0.609 | 0.176 | 0.038 | 3.12E-22 | 14 |
| Selplg        | 0.453  | 0.882 | 0.047 | 6.70E-22 | 14 |
| Rgs2          | -0.482 | 1     | 0.087 | 7.37E-22 | 14 |
| Fabp5         | -0.344 | 0.118 | 0.077 | 4.37E-21 | 14 |
| A630072M18Rik | -0.279 | 0.882 | 0.049 | 1.01E-20 | 14 |
| Hamp2         | -0.473 | 0.882 | 0.051 | 5.29E-20 | 14 |
| Gfpt1         | -0.627 | 1     | 0.095 | 1.05E-19 | 14 |
| S100a13       | -0.301 | 0.118 | 0.085 | 1.38E-19 | 14 |
| Atp4a         | -0.553 | 0.118 | 0.087 | 1.57E-19 | 14 |
| Gngt2         | -0.331 | 0.118 | 0.087 | 2.05E-19 | 14 |
| Lgals1        | -0.549 | 0.176 | 0.051 | 3.03E-19 | 14 |
| Bpifb1        | -0.725 | 1     | 0.097 | 3.30E-19 | 14 |
| Sst           | -0.624 | 0.941 | 0.075 | 3.88E-19 | 14 |
| Rnase1        | -0.251 | 0.471 | 0.02  | 7.35E-19 | 14 |
| Vim           | -1.201 | 0.118 | 0.101 | 8.98E-18 | 14 |
| Atp2a3        | -1.084 | 0.118 | 0.105 | 2.29E-17 | 14 |
| Gsn           | 0.534  | 0.824 | 0.04  | 1.32E-16 | 14 |
| Flna          | -0.398 | 0.176 | 0.069 | 3.23E-16 | 14 |
| Ctse          | -0.685 | 0.941 | 0.089 | 1.10E-15 | 14 |
| Cebpb         | -0.418 | 1     | 0.115 | 1.36E-15 | 14 |

|               |        |       |       |          |    |
|---------------|--------|-------|-------|----------|----|
| Ifi27         | 0.668  | 1     | 0.123 | 1.40E-15 | 14 |
| Igha          | -0.874 | 1     | 0.117 | 4.74E-15 | 14 |
| Gem           | 1.118  | 1     | 0.126 | 5.61E-15 | 14 |
| Dnajb1        | 1.689  | 1     | 0.144 | 6.56E-15 | 14 |
| Ifi203        | 0.943  | 1     | 0.132 | 1.30E-14 | 14 |
| Tnfaip3       | -0.479 | 0.882 | 0.071 | 2.38E-14 | 14 |
| Itgb7         | 0.478  | 0.882 | 0.075 | 3.44E-14 | 14 |
| Pld4          | -0.611 | 0.176 | 0.087 | 4.76E-14 | 14 |
| Hspa1b        | 0.533  | 1     | 0.134 | 5.43E-14 | 14 |
| Anxa10        | -0.269 | 0.882 | 0.073 | 6.32E-14 | 14 |
| Mgst3         | -1.013 | 1     | 0.126 | 1.37E-13 | 14 |
| Rnase6        | 0.319  | 0.235 | 0.047 | 4.10E-13 | 14 |
| Traf1         | -0.327 | 0.235 | 0.049 | 4.77E-13 | 14 |
| Ube2s         | 0.343  | 1     | 0.136 | 5.76E-13 | 14 |
| Nfkbid        | -0.935 | 0.118 | 0.166 | 6.84E-13 | 14 |
| Sla           | -0.576 | 0.235 | 0.051 | 7.75E-13 | 14 |
| Cd69          | 0.960  | 1     | 0.146 | 8.73E-13 | 14 |
| Krt8          | -1.071 | 1     | 0.132 | 1.21E-12 | 14 |
| Bcl2a1b       | -0.649 | 0.176 | 0.083 | 3.13E-12 | 14 |
| Lgals2        | -0.440 | 0.176 | 0.109 | 3.34E-12 | 14 |
| Plaur         | -0.690 | 1     | 0.136 | 4.12E-12 | 14 |
| Irf1          | 0.571  | 0.882 | 0.087 | 6.45E-12 | 14 |
| Car2          | -0.607 | 1     | 0.14  | 1.52E-11 | 14 |
| Pglyrp1       | -0.764 | 0.235 | 0.071 | 1.13E-10 | 14 |
| Creld2        | 0.549  | 0.294 | 0.022 | 1.20E-10 | 14 |
| Lmo4          | -0.749 | 0.235 | 0.073 | 1.59E-10 | 14 |
| 2210407C18Rik | -1.008 | 0.118 | 0.245 | 7.58E-10 | 14 |
| Gm11808       | 0.327  | 0.941 | 0.13  | 1.19E-09 | 14 |
| Agr2          | -0.953 | 0.176 | 0.166 | 1.48E-09 | 14 |
| Dusp1         | 0.801  | 1     | 0.178 | 2.58E-09 | 14 |
| Fcer2a        | 1.376  | 1     | 0.206 | 3.00E-09 | 14 |
| Emp3          | -0.422 | 0.235 | 0.091 | 4.49E-09 | 14 |
| Limd2         | 1.268  | 1     | 0.231 | 4.86E-09 | 14 |
| Gm2a          | -0.636 | 0.235 | 0.095 | 6.03E-09 | 14 |
| Bcr           | 0.317  | 0.647 | 0.01  | 8.63E-09 | 14 |
| Marcksl1      | 0.273  | 0.235 | 0.089 | 9.42E-09 | 14 |
| Id3           | 0.720  | 0.824 | 0.079 | 9.58E-09 | 14 |
| Capg          | 1.060  | 1     | 0.196 | 4.18E-08 | 14 |
| Ctss          | 0.732  | 1     | 0.198 | 4.50E-08 | 14 |
| Slamf6        | -0.354 | 0.235 | 0.115 | 7.02E-08 | 14 |
| Muc6          | -1.239 | 1     | 0.176 | 2.07E-07 | 14 |
| Wdfy4         | -0.779 | 0.176 | 0.138 | 2.16E-07 | 14 |
| Arl6ip1       | 0.631  | 1     | 0.204 | 2.88E-07 | 14 |
| Phlda1        | -0.426 | 0.294 | 0.055 | 3.14E-07 | 14 |
| Tgfb1         | -0.330 | 0.235 | 0.142 | 6.23E-07 | 14 |
| Fcmr          | 1.103  | 1     | 0.257 | 1.29E-06 | 14 |
| H2-DMb1       | -0.494 | 0.235 | 0.158 | 1.42E-06 | 14 |
| Igkv3-5       | 1.698  | 0.118 | 0.002 | 1.70E-06 | 14 |
| Hist1h3e      | 0.346  | 0.353 | 0.008 | 2.21E-06 | 14 |
| Psmb8         | 0.344  | 1     | 0.217 | 7.53E-06 | 14 |

|          |        |       |       |             |    |
|----------|--------|-------|-------|-------------|----|
| Gimap5   | -0.336 | 0.294 | 0.083 | 1.14E-05    | 14 |
| Ndrp1    | 0.328  | 0.353 | 0.014 | 1.26E-05    | 14 |
| Cr2      | -0.465 | 1     | 0.2   | 1.59E-05    | 14 |
| Ifi2712a | 1.099  | 1     | 0.253 | 1.88E-05    | 14 |
| Gif      | -0.590 | 1     | 0.202 | 1.95E-05    | 14 |
| Ncf2     | 0.283  | 0.294 | 0.083 | 2.14E-05    | 14 |
| Tff2     | -1.869 | 0.235 | 0.417 | 4.28E-05    | 14 |
| Gm30211  | 0.841  | 0.882 | 0.168 | 5.99E-05    | 14 |
| Il2rg    | 0.497  | 0.882 | 0.162 | 0.000109063 | 14 |
| Cks2     | 0.272  | 0.353 | 0.03  | 0.000347725 | 14 |
| Myc      | -0.386 | 0.294 | 0.136 | 0.000363507 | 14 |
| Rasgrp2  | -0.901 | 0.294 | 0.17  | 0.000569943 | 14 |
| S100a6   | -1.045 | 0.294 | 0.174 | 0.000643151 | 14 |
| Cym      | -1.665 | 1     | 0.225 | 0.000774773 | 14 |
| Cotl1    | 0.585  | 1     | 0.267 | 0.000848435 | 14 |
| Pou2af1  | -0.940 | 0.294 | 0.213 | 0.001394304 | 14 |
| Ltb      | 1.144  | 0.941 | 0.322 | 0.001540264 | 14 |
| H2-DMA   | 0.689  | 1     | 0.308 | 0.001577298 | 14 |
| Atp5k    | -1.093 | 1     | 0.231 | 0.001717409 | 14 |
| Gsta4    | -0.468 | 0.353 | 0.051 | 0.00239581  | 14 |
| Iglc3    | 0.661  | 1     | 0.328 | 0.004178213 | 14 |
| Mzb1     | 0.348  | 1     | 0.283 | 0.005157615 | 14 |
| Trp53i11 | 0.484  | 0.353 | 0.061 | 0.010546602 | 14 |
| Cd52     | 1.012  | 1     | 0.656 | 0.011677651 | 14 |
| Fxyd5    | 0.265  | 0.353 | 0.075 | 0.018963049 | 14 |
| Rfk      | 0.467  | 0.353 | 0.077 | 0.025820583 | 14 |
| Cd53     | 0.403  | 1     | 0.3   | 0.039451485 | 14 |
| Fcrla    | -0.483 | 0.353 | 0.128 | 0.04099173  | 14 |
| S1pr1    | -0.460 | 0.353 | 0.121 | 0.045311404 | 14 |
| Clu      | -0.563 | 0.353 | 0.134 | 0.052801571 | 14 |
| Tuba1b   | -0.420 | 0.353 | 0.13  | 0.057071682 | 14 |
| Hes1     | -0.409 | 0.647 | 0.032 | 0.066282106 | 14 |
| Sprp2a3  | -0.820 | 1     | 0.267 | 0.07466129  | 14 |
| Gimap4   | -0.614 | 0.353 | 0.16  | 0.075817835 | 14 |
| Cd74     | 0.542  | 1     | 0.986 | 0.113013076 | 14 |
| Rps15    | 1.114  | 1     | 0.632 | 0.148579661 | 14 |
| Fcgr2b   | 0.251  | 0.706 | 0.081 | 0.153824549 | 14 |
| Pla2g1b  | -2.139 | 1     | 0.789 | 0.160696645 | 14 |
| Ighg2b   | -0.461 | 0.235 | 0.034 | 0.170222728 | 14 |
| Cybb     | -0.535 | 1     | 0.283 | 0.23508001  | 14 |
| H2-DMb2  | 0.613  | 1     | 0.429 | 0.283509097 | 14 |
| Clps     | -1.734 | 1     | 0.789 | 0.314984868 | 14 |
| Plac8    | 0.272  | 0.882 | 0.257 | 0.63804872  | 14 |
| Pstpip1  | 0.254  | 0.412 | 0.02  | 0.971835042 | 14 |
| Blk      | 0.549  | 0.824 | 0.219 | 1           | 14 |
| Gm42418  | -1.921 | 0.941 | 0.783 | 1           | 14 |
| Gimap7   | 0.306  | 0.647 | 0.055 | 1           | 14 |
| Chia1    | -1.418 | 0.471 | 0.391 | 1           | 14 |
| H2-Eb1   | 0.638  | 1     | 0.826 | 1           | 14 |
| H2-T23   | -0.904 | 0.412 | 0.196 | 1           | 14 |

|               |        |       |       |   |    |
|---------------|--------|-------|-------|---|----|
| Ptpn18        | 0.586  | 0.882 | 0.324 | 1 | 14 |
| Irf8          | -0.381 | 0.412 | 0.215 | 1 | 14 |
| Runx3         | -0.326 | 0.412 | 0.065 | 1 | 14 |
| Nr4a1         | 0.327  | 1     | 0.374 | 1 | 14 |
| Phgdh         | 0.495  | 0.412 | 0.049 | 1 | 14 |
| Pgc           | -1.352 | 1     | 0.781 | 1 | 14 |
| Spib          | -0.494 | 0.412 | 0.144 | 1 | 14 |
| Dut           | 0.559  | 0.412 | 0.055 | 1 | 14 |
| Rps29         | 0.670  | 1     | 0.937 | 1 | 14 |
| Iglc1         | -0.348 | 0.412 | 0.164 | 1 | 14 |
| Ncf4          | 0.271  | 0.412 | 0.093 | 1 | 14 |
| Cytip         | -0.324 | 0.824 | 0.219 | 1 | 14 |
| Tff1          | -1.175 | 0.706 | 0.67  | 1 | 14 |
| Igkc          | 0.370  | 1     | 0.775 | 1 | 14 |
| Gm8369        | 0.764  | 0.765 | 0.245 | 1 | 14 |
| Ebf1          | -0.655 | 0.706 | 0.794 | 1 | 14 |
| Msn           | 0.258  | 0.882 | 0.356 | 1 | 14 |
| Gm10260       | -0.808 | 0.471 | 0.241 | 1 | 14 |
| H2-Ab1        | 0.480  | 1     | 0.816 | 1 | 14 |
| Lars2         | -0.740 | 0.471 | 0.296 | 1 | 14 |
| Trac          | -0.339 | 0.412 | 0.087 | 1 | 14 |
| Rac2          | 0.426  | 0.882 | 0.419 | 1 | 14 |
| Ptprc         | -0.260 | 1     | 0.405 | 1 | 14 |
| H2-Aa         | 0.364  | 1     | 0.957 | 1 | 14 |
| Unc93b1       | -0.709 | 0.471 | 0.204 | 1 | 14 |
| Crip1         | -1.123 | 0.588 | 0.441 | 1 | 14 |
| Mef2c         | 0.265  | 1     | 0.53  | 1 | 14 |
| Ddit4         | -0.264 | 0.588 | 0.036 | 1 | 14 |
| Hist1h4n      | 0.651  | 0.588 | 0.038 | 1 | 14 |
| Ghrl          | -1.205 | 1     | 0.381 | 1 | 14 |
| Cd83          | 0.397  | 0.882 | 0.482 | 1 | 14 |
| Cd19          | -0.939 | 0.588 | 0.364 | 1 | 14 |
| H2afz         | -0.572 | 0.529 | 0.281 | 1 | 14 |
| Samsn1        | -0.501 | 0.176 | 0.059 | 1 | 14 |
| 1810010D01Rik | -0.925 | 0.647 | 0.109 | 1 | 14 |
| Rpl17         | 0.790  | 1     | 0.652 | 1 | 14 |
| Rpl23a        | 0.437  | 1     | 0.557 | 1 | 14 |
| ApoE          | -0.589 | 0.882 | 0.348 | 1 | 14 |
| Tmsb10        | 0.338  | 1     | 0.897 | 1 | 14 |
| Ly86          | 0.295  | 0.471 | 0.107 | 1 | 14 |
| Ighm          | -0.713 | 0.824 | 0.595 | 1 | 14 |
| Tkt           | 0.410  | 0.471 | 0.095 | 1 | 14 |
| Ehd4          | 0.311  | 0.471 | 0.028 | 1 | 14 |
| Cd72          | -0.281 | 0.529 | 0.237 | 1 | 14 |
| Ighd          | -1.078 | 1     | 0.421 | 1 | 14 |
| Ly6d          | 0.945  | 0.471 | 0.101 | 1 | 14 |
| Nfe2l2        | -0.499 | 0.588 | 0.069 | 1 | 14 |
| Cd79b         | 0.317  | 0.824 | 0.427 | 1 | 14 |
| PscA          | -0.339 | 0.588 | 0.296 | 1 | 14 |
| Gimap6        | -0.401 | 0.765 | 0.271 | 1 | 14 |

|          |        |       |       |          |    |
|----------|--------|-------|-------|----------|----|
| Neat1    | -0.261 | 0.529 | 0.186 | 1        | 14 |
| Prdx1    | -0.424 | 0.588 | 0.306 | 1        | 14 |
| Ckb      | 0.590  | 0.529 | 0.004 | 1        | 14 |
| Klf2     | -0.746 | 0.588 | 0.289 | 1        | 14 |
| Ikzf3    | -0.315 | 0.529 | 0.17  | 1        | 14 |
| Ms4a1    | -0.407 | 0.765 | 0.522 | 1        | 14 |
| Gkn2     | -0.553 | 0.765 | 0.294 | 1        | 14 |
| Gstp1    | -0.530 | 0.529 | 0.136 | 1        | 14 |
| H2-K1    | 0.294  | 1     | 0.688 | 1        | 14 |
| Napsa    | 0.377  | 0.529 | 0.188 | 1        | 14 |
| Gpsm3    | 0.568  | 0.588 | 0.111 | 1        | 14 |
| Arhgdib  | -0.284 | 0.882 | 0.407 | 1        | 14 |
| S100a11  | -0.557 | 0.588 | 0.233 | 1        | 14 |
| Iglc2    | -0.335 | 0.941 | 0.468 | 1        | 14 |
| Ptprcap  | 0.424  | 0.647 | 0.235 | 1        | 14 |
| Srgn     | -0.760 | 0.706 | 0.374 | 1        | 14 |
| Rpl9-ps6 | -0.473 | 1     | 0.623 | 1        | 14 |
| Pecam1   | -0.485 | 0.176 | 0.109 | 1        | 14 |
| Basp1    | -0.307 | 0.353 | 0.036 | 1        | 14 |
| Lsp1     | -0.276 | 0.588 | 0.221 | 1        | 14 |
| Clic1    | -0.525 | 0.588 | 0.198 | 1        | 14 |
| Gkn1     | -0.785 | 0.765 | 0.393 | 1        | 14 |
| Hspa1a   | 1.061  | 0.529 | 0.115 | 1        | 14 |
| Tagln2   | 0.259  | 0.588 | 0.168 | 1        | 14 |
| Ucp2     | -0.732 | 0.706 | 0.308 | 1        | 14 |
| Cst3     | -0.874 | 0.706 | 0.3   | 1        | 14 |
| Hamp     | -0.470 | 0.938 | 0.036 | 1.46E-71 | 15 |
| Socs1    | -0.270 | 1     | 0.088 | 2.58E-60 | 15 |
| Gbp7     | -0.299 | 1     | 0.104 | 7.84E-55 | 15 |
| Ido1     | -0.473 | 1     | 0.104 | 7.94E-55 | 15 |
| Oasl1    | -0.299 | 0.983 | 0.101 | 3.17E-54 | 15 |
| Sprr1a   | -0.444 | 0.835 | 0.055 | 6.90E-54 | 15 |
| Dpcr1    | 0.431  | 0.136 | 0.036 | 1.53E-49 | 15 |
| Gbp2     | -0.379 | 1     | 0.127 | 1.02E-47 | 15 |
| Ptgds    | -0.622 | 0.92  | 0.088 | 8.39E-47 | 15 |
| Nupr1    | 0.271  | 0.153 | 0.049 | 1.15E-44 | 15 |
| Clca3a2  | -0.600 | 0.994 | 0.136 | 2.42E-44 | 15 |
| Gbp4     | -0.669 | 1     | 0.14  | 6.15E-44 | 15 |
| Smpd3    | -0.300 | 0.994 | 0.136 | 1.12E-43 | 15 |
| Serping1 | -0.491 | 0.983 | 0.136 | 2.61E-43 | 15 |
| Mpeg1    | -0.300 | 0.96  | 0.133 | 3.60E-42 | 15 |
| Isg15    | -0.297 | 0.989 | 0.14  | 7.96E-42 | 15 |
| Cd59a    | 0.285  | 0.17  | 0.016 | 8.42E-40 | 15 |
| Itih4    | -0.655 | 0.983 | 0.149 | 9.46E-40 | 15 |
| Gm4951   | -0.418 | 0.989 | 0.153 | 2.25E-39 | 15 |
| Gm11361  | -0.329 | 0.994 | 0.156 | 3.77E-39 | 15 |
| Neurl3   | -0.351 | 0.71  | 0.071 | 1.18E-36 | 15 |
| Bex2     | 0.377  | 0.188 | 0.003 | 2.62E-36 | 15 |
| Lypd8    | 0.555  | 0.869 | 0.062 | 4.29E-36 | 15 |
| Ly6d     | -0.577 | 0.983 | 0.172 | 2.58E-34 | 15 |

|               |        |       |       |          |    |
|---------------|--------|-------|-------|----------|----|
| Icam1         | -0.633 | 1     | 0.179 | 9.86E-34 | 15 |
| Serpina3g     | -0.865 | 1     | 0.185 | 3.46E-32 | 15 |
| S100a6        | -0.398 | 1     | 0.198 | 3.60E-31 | 15 |
| Guca2b        | -0.492 | 0.994 | 0.192 | 5.23E-30 | 15 |
| Gbp2b         | -0.732 | 1     | 0.195 | 6.00E-30 | 15 |
| Cfi           | -0.255 | 0.977 | 0.185 | 4.92E-29 | 15 |
| Pnliprp2      | -0.452 | 0.216 | 0.075 | 1.33E-27 | 15 |
| Klf4          | -0.300 | 0.983 | 0.205 | 2.07E-26 | 15 |
| Mfge8         | -0.448 | 1     | 0.214 | 2.40E-26 | 15 |
| Cxcl10        | -0.656 | 0.864 | 0.104 | 4.03E-26 | 15 |
| Plk2          | -0.257 | 0.955 | 0.182 | 4.81E-26 | 15 |
| Guca2a        | -0.519 | 0.886 | 0.13  | 1.59E-25 | 15 |
| Spib          | -0.670 | 0.466 | 0.036 | 6.61E-25 | 15 |
| Rgs5          | -1.429 | 0.881 | 0.179 | 1.87E-24 | 15 |
| Gm20400       | 0.273  | 0.244 | 0.023 | 4.78E-24 | 15 |
| Cxcl9         | -1.308 | 0.818 | 0.162 | 6.18E-24 | 15 |
| Ghrl          | 0.309  | 1     | 0.256 | 1.20E-23 | 15 |
| Cxcl17        | -0.504 | 0.994 | 0.231 | 5.40E-22 | 15 |
| Snhg18        | -0.304 | 0.869 | 0.13  | 7.53E-22 | 15 |
| Slc9a3        | -0.606 | 0.983 | 0.234 | 5.15E-21 | 15 |
| Gclc          | -0.256 | 0.915 | 0.179 | 2.05E-20 | 15 |
| Serpinb9      | -1.387 | 1     | 0.244 | 4.32E-20 | 15 |
| Hes1          | -0.259 | 0.983 | 0.24  | 6.26E-20 | 15 |
| Pglyrp1       | -0.852 | 0.972 | 0.227 | 7.23E-20 | 15 |
| Cyba          | -0.566 | 1     | 0.25  | 8.25E-20 | 15 |
| Muc6          | -0.410 | 1     | 0.253 | 2.80E-19 | 15 |
| Klf2          | -0.359 | 0.989 | 0.253 | 1.12E-18 | 15 |
| Pmm1          | 0.469  | 0.949 | 0.273 | 5.55E-18 | 15 |
| Irf1          | -0.529 | 1     | 0.256 | 6.95E-18 | 15 |
| Irf8          | -0.410 | 1     | 0.26  | 1.54E-17 | 15 |
| Tmem176b      | -0.497 | 0.33  | 0.231 | 5.01E-17 | 15 |
| H2-Eb1        | -0.839 | 1     | 0.883 | 8.18E-17 | 15 |
| Umod          | -1.909 | 0.989 | 0.26  | 8.90E-17 | 15 |
| Sprr2a3       | -0.848 | 1     | 0.279 | 3.10E-16 | 15 |
| Foxq1         | -0.271 | 1     | 0.276 | 3.64E-16 | 15 |
| Pga5          | -0.383 | 0.886 | 0.192 | 7.55E-15 | 15 |
| Reg3g         | -0.400 | 0.517 | 0.104 | 1.54E-14 | 15 |
| Ifi47         | -0.691 | 1     | 0.282 | 1.11E-13 | 15 |
| Cd74          | -0.446 | 1     | 0.994 | 3.63E-13 | 15 |
| 2200002D01Rik | -0.571 | 0.824 | 0.146 | 5.70E-13 | 15 |
| St3gal4       | -0.295 | 0.864 | 0.188 | 1.35E-12 | 15 |
| Ifi2712a      | -0.349 | 0.875 | 0.211 | 4.99E-12 | 15 |
| H2-Ab1        | -0.675 | 1     | 0.942 | 1.60E-11 | 15 |
| Cd36          | 0.300  | 0.33  | 0.075 | 1.04E-10 | 15 |
| Pdia2         | -0.281 | 0.989 | 0.308 | 1.12E-10 | 15 |
| Gstp2         | 0.260  | 0.347 | 0.192 | 1.97E-10 | 15 |
| H2-Aa         | -0.680 | 1     | 0.961 | 2.09E-10 | 15 |
| Nr0b2         | 0.367  | 0.909 | 0.305 | 2.47E-10 | 15 |
| Aldh3a1       | 0.252  | 0.455 | 0.01  | 3.09E-10 | 15 |
| Gpx2          | -0.263 | 0.398 | 0.344 | 6.86E-10 | 15 |



|          |        |       |       |             |    |
|----------|--------|-------|-------|-------------|----|
| Oit1     | -0.395 | 1     | 0.321 | 7.34E-10    | 15 |
| Tff2     | 0.278  | 0.92  | 0.312 | 1.55E-08    | 15 |
| Sox4     | -0.437 | 1     | 0.331 | 2.17E-08    | 15 |
| Preli2   | 0.357  | 0.358 | 0.127 | 8.21E-08    | 15 |
| Gkn1     | 1.284  | 0.79  | 0.263 | 1.03E-07    | 15 |
| H2-K1    | -0.296 | 1     | 0.961 | 2.00E-07    | 15 |
| Tubb4b   | 0.280  | 0.92  | 0.357 | 2.33E-07    | 15 |
| Plac8    | -0.692 | 1     | 0.334 | 2.76E-07    | 15 |
| Pigr     | -1.025 | 1     | 0.74  | 3.25E-07    | 15 |
| S100a13  | -0.309 | 0.864 | 0.253 | 1.59E-06    | 15 |
| Cym      | -2.041 | 1     | 0.367 | 2.64E-06    | 15 |
| Ifrd1    | -0.273 | 0.875 | 0.269 | 2.84E-06    | 15 |
| Papss2   | -0.416 | 0.938 | 0.315 | 4.28E-06    | 15 |
| Rps29    | 0.494  | 1     | 0.977 | 4.73E-06    | 15 |
| Car8     | 0.255  | 0.369 | 0.058 | 6.89E-06    | 15 |
| Smim6    | -0.309 | 0.943 | 0.331 | 9.31E-06    | 15 |
| Psm8     | -0.755 | 1     | 0.74  | 1.17E-05    | 15 |
| Chia1    | 0.430  | 0.75  | 0.211 | 1.20E-05    | 15 |
| AW112010 | -1.838 | 1     | 0.354 | 3.48E-05    | 15 |
| Mt2      | -0.676 | 0.989 | 0.377 | 0.000102971 | 15 |
| Wfdc2    | -0.753 | 0.994 | 0.367 | 0.000199074 | 15 |
| Spink4   | -0.799 | 1     | 0.403 | 0.000440776 | 15 |
| Gkn2     | 1.058  | 0.75  | 0.26  | 0.000780559 | 15 |
| Rpl9-ps6 | 0.332  | 0.926 | 0.558 | 0.000816623 | 15 |
| Pthlh    | 0.411  | 0.386 | 0.032 | 0.001209709 | 15 |
| Clu      | -1.357 | 0.898 | 0.679 | 0.002731335 | 15 |
| mt-Nd3   | -0.657 | 1     | 0.815 | 0.003042259 | 15 |
| Iftm3    | -0.675 | 1     | 0.386 | 0.006444935 | 15 |
| Gstp1    | 0.475  | 0.892 | 0.653 | 0.010791666 | 15 |
| Hist1h1c | -0.255 | 0.869 | 0.321 | 0.010853912 | 15 |
| Cox7a1   | 0.439  | 0.983 | 0.627 | 0.011704232 | 15 |
| Prnp     | -0.435 | 0.517 | 0.364 | 0.016666774 | 15 |
| Clps     | -0.603 | 1     | 0.851 | 0.020369975 | 15 |
| Irgm1    | -0.687 | 1     | 0.386 | 0.022383187 | 15 |
| Tff1     | 0.996  | 0.812 | 0.5   | 0.043027791 | 15 |
| H2-DMB1  | -0.403 | 1     | 0.396 | 0.057677414 | 15 |
| Pgc      | -0.342 | 0.989 | 0.799 | 0.058843614 | 15 |
| Sox9     | -0.301 | 1     | 0.422 | 0.061730528 | 15 |
| Gm11808  | -0.409 | 1     | 0.399 | 0.063768901 | 15 |
| Iigp1    | -1.001 | 1     | 0.393 | 0.099359614 | 15 |
| Gif      | -0.740 | 0.506 | 0.269 | 0.100919164 | 15 |
| H2-DMB2  | -0.774 | 1     | 0.393 | 0.102666415 | 15 |
| Irf7     | -0.427 | 0.483 | 0.169 | 0.310928549 | 15 |
| Cebpb    | -0.304 | 0.483 | 0.159 | 0.539652238 | 15 |
| Tuba1b   | -0.252 | 0.506 | 0.211 | 0.710099616 | 15 |
| Nfkb1a   | -0.545 | 0.852 | 0.318 | 0.770337868 | 15 |
| Dmbt1    | -1.366 | 1     | 0.412 | 1           | 15 |
| Atp4a    | 0.543  | 1     | 0.951 | 1           | 15 |
| Anxa10   | -0.424 | 0.875 | 0.692 | 1           | 15 |
| Ly6c1    | -1.089 | 0.693 | 0.166 | 1           | 15 |

|               |        |       |       |             |    |
|---------------|--------|-------|-------|-------------|----|
| Lgals2        | 0.274  | 0.744 | 0.276 | 1           | 15 |
| Gfpt1         | -0.585 | 1     | 0.438 | 1           | 15 |
| Wars          | -0.992 | 0.852 | 0.338 | 1           | 15 |
| Fabp5         | -0.369 | 0.773 | 0.766 | 1           | 15 |
| Marcks1       | -0.750 | 0.494 | 0.133 | 1           | 15 |
| Tubb5         | -0.254 | 0.58  | 0.286 | 1           | 15 |
| Bpifb1        | -1.002 | 1     | 0.688 | 1           | 15 |
| Rnase1        | -0.803 | 0.653 | 0.367 | 1           | 15 |
| Ly6a          | -2.123 | 1     | 0.607 | 1           | 15 |
| Igtp          | -0.790 | 1     | 0.451 | 1           | 15 |
| Neat1         | -0.682 | 1     | 0.597 | 1           | 15 |
| Serpinb1a     | -0.710 | 0.977 | 0.51  | 1           | 15 |
| Ubd           | -1.742 | 1     | 0.451 | 1           | 15 |
| S100a1        | -0.257 | 0.892 | 0.812 | 1           | 15 |
| Glod5         | 0.294  | 0.631 | 0.231 | 1           | 15 |
| S100a11       | -0.672 | 1     | 0.487 | 1           | 15 |
| Pdlim4        | 0.358  | 0.699 | 0.442 | 1           | 15 |
| Atp5k         | 0.484  | 1     | 0.935 | 1           | 15 |
| Ly6e          | -0.660 | 1     | 0.584 | 1           | 15 |
| 2210407C18Rik | 0.291  | 1     | 0.659 | 1           | 15 |
| Gm42418       | 0.504  | 1     | 0.929 | 1           | 15 |
| Abhd2         | -0.295 | 0.994 | 0.555 | 1           | 15 |
| Atf3          | -0.341 | 0.835 | 0.425 | 1           | 15 |
| Hspa1b        | -0.343 | 1     | 0.555 | 1           | 15 |
| Esd           | 0.394  | 0.557 | 0.377 | 1           | 15 |
| Pcp4l1        | 0.312  | 0.511 | 0.097 | 1           | 15 |
| Bst2          | -0.471 | 0.807 | 0.39  | 1           | 15 |
| Crip1         | -0.605 | 1     | 0.539 | 1           | 15 |
| Tpm1          | -0.254 | 0.824 | 0.695 | 1           | 15 |
| H2-DMA        | -0.633 | 1     | 0.5   | 1           | 15 |
| H2-T23        | -0.700 | 1     | 0.5   | 1           | 15 |
| Gm3839        | 0.446  | 0.54  | 0.133 | 1           | 15 |
| Gm26825       | -0.266 | 1     | 0.093 | 1.33E-25    | 16 |
| Scgb2b7       | 0.789  | 0.124 | 0.013 | 2.62E-21    | 16 |
| Cebpb         | -0.258 | 1     | 0.213 | 2.55E-15    | 16 |
| Sprr2a3       | -0.354 | 1     | 0.253 | 2.29E-12    | 16 |
| Bpifb1        | 0.679  | 1     | 0.427 | 9.93E-11    | 16 |
| Cym           | -2.936 | 1     | 0.36  | 1.16E-09    | 16 |
| Fam13a        | -0.596 | 1     | 0.28  | 2.17E-08    | 16 |
| Lbh           | -0.346 | 0.913 | 0.213 | 2.12E-07    | 16 |
| AY036118      | 0.319  | 1     | 0.747 | 4.18E-07    | 16 |
| Pgc           | -0.336 | 1     | 1     | 1.27E-06    | 16 |
| Hspa1a        | -0.712 | 1     | 0.333 | 5.11E-06    | 16 |
| mt-Nd3        | -0.369 | 1     | 0.44  | 1.24E-05    | 16 |
| Chka          | -0.511 | 0.995 | 0.32  | 1.82E-05    | 16 |
| Nr4a2         | -0.387 | 0.997 | 0.333 | 0.000116706 | 16 |
| Furin         | -1.262 | 1     | 1     | 0.004272129 | 16 |
| Tff2          | -0.339 | 1     | 0.44  | 0.00564857  | 16 |
| Gfpt1         | -0.367 | 1     | 0.427 | 0.008200094 | 16 |
| Sema7a        | -0.307 | 1     | 0.36  | 0.012868457 | 16 |

|          |        |       |       |             |    |
|----------|--------|-------|-------|-------------|----|
| Soat1    | -0.543 | 0.966 | 0.48  | 0.762908901 | 16 |
| Malat1   | -1.953 | 1     | 0.987 | 1           | 16 |
| Gif      | -0.314 | 1     | 1     | 1           | 16 |
| Hspa1b   | -0.918 | 1     | 0.573 | 1           | 16 |
| Atf3     | -0.412 | 0.536 | 0.36  | 1           | 16 |
| Lars2    | -0.351 | 1     | 0.773 | 1           | 16 |
| Necab1   | -0.303 | 0.66  | 0.427 | 1           | 16 |
| H2-K1    | -0.337 | 1     | 0.733 | 1           | 16 |
| Fam46c   | -0.600 | 0.968 | 0.773 | 1           | 16 |
| Derl3    | -0.543 | 0.889 | 0.48  | 1           | 16 |
| Pnliprp1 | -0.445 | 0.971 | 0.56  | 1           | 16 |
| Tff1     | -0.584 | 1     | 0.773 | 1           | 16 |
| Nupr1    | -0.336 | 0.997 | 0.947 | 1           | 16 |
| Fxyd6    | -0.258 | 0.847 | 0.52  | 1           | 16 |
| Gm26917  | -1.119 | 1     | 0.787 | 1           | 16 |
| Myc      | -0.318 | 0.528 | 0.133 | 1           | 16 |
| Klf2     | -0.538 | 0.781 | 0.4   | 1           | 16 |
| Cited2   | -0.523 | 0.997 | 0.733 | 1           | 16 |
| Pnliprp2 | -0.258 | 1     | 0.893 | 1           | 16 |
| Tcim     | -0.712 | 0.855 | 0.667 | 1           | 16 |
| C2cd4b   | -0.509 | 0.72  | 0.493 | 1           | 16 |
| Actb     | -0.416 | 1     | 0.8   | 1           | 16 |
| Neat1    | -1.281 | 1     | 0.827 | 1           | 16 |
| Chia1    | -1.030 | 0.987 | 0.853 | 1           | 16 |
| Rps15    | -0.341 | 1     | 0.72  | 1           | 16 |
| Nrn1     | 0.381  | 0.522 | 0.2   | 1           | 16 |
| Gper1    | -0.484 | 0.887 | 0.573 | 1           | 16 |
| Pdia2    | -0.912 | 1     | 0.773 | 1           | 16 |
| Anpep    | -0.409 | 0.939 | 0.68  | 1           | 16 |
| Scgb2b7  | -0.263 | 0.885 | 0.098 | 1.55E-22    | 18 |
| Scgb2b20 | -0.315 | 0.846 | 0.111 | 6.19E-22    | 18 |
| Clca1    | -0.410 | 0.827 | 0.117 | 1.82E-21    | 18 |
| Igfbp5   | 1.031  | 0.981 | 0.188 | 1.06E-20    | 18 |
| Duox2    | -0.490 | 0.981 | 0.22  | 1.09E-11    | 18 |
| Krt13    | -0.276 | 0.635 | 0.098 | 8.23E-11    | 18 |
| Fhl1     | 0.264  | 0.865 | 0.17  | 1.09E-10    | 18 |
| Aldh1a3  | -0.262 | 0.731 | 0.085 | 4.44E-09    | 18 |
| Cd44     | -0.299 | 1     | 0.252 | 5.21E-09    | 18 |
| Gm20400  | -0.340 | 0.308 | 0.133 | 7.30E-09    | 18 |
| Sprr2a3  | 0.934  | 1     | 0.997 | 6.26E-08    | 18 |
| Muc4     | -0.252 | 1     | 0.276 | 8.19E-07    | 18 |
| Gsdmc2   | 0.348  | 1     | 0.379 | 1.09E-06    | 18 |
| Tstd1    | -0.290 | 0.346 | 0.284 | 2.02E-06    | 18 |
| Gkn3     | -0.714 | 0.981 | 0.271 | 2.81E-06    | 18 |
| Chil4    | -0.886 | 1     | 0.308 | 6.03E-06    | 18 |
| Bst2     | 0.269  | 0.942 | 0.366 | 0.000113934 | 18 |
| Lypd8    | 0.818  | 0.962 | 0.488 | 0.000279633 | 18 |
| Itln1    | -0.370 | 1     | 0.347 | 0.000615795 | 18 |
| Pmm1     | 0.414  | 0.865 | 0.345 | 0.001693838 | 18 |
| Gpx2     | 0.868  | 1     | 0.968 | 0.006985174 | 18 |

|               |        |       |       |             |    |
|---------------|--------|-------|-------|-------------|----|
| Lgals2        | 0.453  | 0.981 | 0.836 | 0.011372892 | 18 |
| A4gnt         | -0.272 | 0.462 | 0.34  | 0.019523556 | 18 |
| Pla2g1b       | -0.648 | 1     | 0.989 | 0.019639256 | 18 |
| 2210407C18Rik | 0.797  | 1     | 0.809 | 0.041440966 | 18 |
| Irf1          | -0.313 | 1     | 0.361 | 0.114201544 | 18 |
| Ethe1         | 0.371  | 0.942 | 0.562 | 0.119822483 | 18 |
| Pgc           | -0.450 | 1     | 0.997 | 0.141537929 | 18 |
| Gkn2          | 0.536  | 0.904 | 0.687 | 0.156713948 | 18 |
| Gkn1          | 0.551  | 0.981 | 0.804 | 0.194145471 | 18 |
| Rfk           | 0.329  | 0.981 | 0.706 | 0.199992566 | 18 |
| Clps          | -0.652 | 1     | 0.995 | 0.28859501  | 18 |
| Nfkbia        | 0.280  | 0.962 | 0.525 | 0.354043134 | 18 |
| Lgals4        | 0.474  | 0.923 | 0.472 | 0.443724015 | 18 |
| Plac8         | 0.284  | 1     | 0.82  | 0.601621308 | 18 |
| Clu           | -0.279 | 1     | 0.997 | 0.926301409 | 18 |
| Gfpt1         | -0.425 | 1     | 0.902 | 0.926546158 | 18 |
| H2afz         | 0.361  | 1     | 0.926 | 1           | 18 |
| Malat1        | -0.307 | 1     | 0.995 | 1           | 18 |
| Tff1          | 0.440  | 0.923 | 0.912 | 1           | 18 |
| Gsdma2        | 0.337  | 0.904 | 0.653 | 1           | 18 |
| Pzca          | 0.284  | 0.981 | 0.814 | 1           | 18 |
| Agpat2        | 0.281  | 0.885 | 0.541 | 1           | 18 |
| Mt1           | -0.712 | 1     | 0.952 | 1           | 18 |
| Sprr1a        | -0.460 | 1     | 0.493 | 1           | 18 |
| Hspa1b        | -0.282 | 1     | 0.886 | 1           | 18 |
| Cfi           | -0.263 | 0.654 | 0.493 | 1           | 18 |
| Lgals3        | -0.346 | 1     | 0.517 | 1           | 18 |
| Cxcl17        | -0.271 | 0.827 | 0.666 | 1           | 18 |
| Neat1         | -0.261 | 1     | 0.939 | 1           | 18 |
| Mfge8         | -0.327 | 0.923 | 0.706 | 1           | 18 |
| Muc6          | -1.072 | 1     | 0.679 | 1           | 18 |
| Tinagl1       | -0.315 | 0.635 | 0.345 | 1           | 18 |
| Gstm1         | -0.291 | 0.788 | 0.674 | 1           | 18 |
| F3            | -0.251 | 0.365 | 0.101 | 1           | 18 |
| Mt2           | -0.543 | 0.731 | 0.533 | 1           | 18 |
| Anxa10        | 0.252  | 1     | 0.981 | 1           | 18 |
| S100a6        | 0.326  | 1     | 0.905 | 1           | 18 |
| AY036118      | -0.462 | 1     | 0.931 | 1           | 18 |
| Tff2          | -0.584 | 0.885 | 0.838 | 1           | 18 |
| Nr4a1         | -0.261 | 0.692 | 0.414 | 1           | 18 |
| Dmbt1         | 0.367  | 1     | 0.735 | 1           | 18 |
| Il33          | -0.280 | 0.692 | 0.35  | 1           | 18 |
| Emp1          | -0.457 | 0.885 | 0.485 | 1           | 18 |
| Gif           | -0.579 | 0.654 | 0.279 | 1           | 18 |
| Chka          | -0.438 | 1     | 0.618 | 1           | 18 |
| Gm42418       | 0.313  | 1     | 1     | 1           | 18 |
| Sox9          | -0.396 | 0.942 | 0.61  | 1           | 18 |
| S100a13       | -0.270 | 1     | 0.65  | 1           | 18 |
| Snhg18        | -0.262 | 0.769 | 0.39  | 1           | 18 |
| Sox4          | -0.399 | 0.942 | 0.631 | 1           | 18 |

|               |        |       |       |          |    |
|---------------|--------|-------|-------|----------|----|
| Pga5          | -0.339 | 0.827 | 0.477 | 1        | 18 |
| Krt7          | -0.391 | 0.673 | 0.26  | 1        | 18 |
| Gadd45g       | -0.331 | 0.865 | 0.499 | 1        | 18 |
| Fcer1a        | 0.395  | 0.827 | 0.009 | 5.68E-63 | 19 |
| Il6           | 0.288  | 0.853 | 0.018 | 1.05E-60 | 19 |
| 1810011H11Rik | 0.311  | 0.8   | 0.018 | 6.95E-56 | 19 |
| Mcpt2         | 1.387  | 0.893 | 0.012 | 1.57E-54 | 19 |
| Cxcl13        | 0.311  | 0.96  | 0.051 | 3.22E-53 | 19 |
| Il1rl1        | 0.258  | 0.867 | 0.018 | 7.77E-52 | 19 |
| Gbp2b         | -0.350 | 1     | 0.069 | 3.58E-51 | 19 |
| Retnla        | -1.474 | 0.813 | 0.03  | 4.87E-51 | 19 |
| Cma1          | 1.893  | 0.84  | 0.009 | 5.61E-51 | 19 |
| Tnfsf9        | 0.351  | 0.8   | 0.03  | 4.47E-50 | 19 |
| Cst7          | 0.292  | 0.853 | 0.042 | 1.04E-49 | 19 |
| Ubd           | -0.363 | 1     | 0.075 | 5.95E-49 | 19 |
| Tpsab1        | 1.567  | 0.84  | 0.009 | 1.37E-48 | 19 |
| Ndrp1         | -0.273 | 0.987 | 0.069 | 3.29E-48 | 19 |
| Sell          | -0.255 | 1     | 0.078 | 5.69E-48 | 19 |
| Mcpt1         | 1.418  | 0.893 | 0.03  | 2.44E-47 | 19 |
| Rflnb         | -0.283 | 0.947 | 0.051 | 1.07E-45 | 19 |
| Mki67         | -0.290 | 0.92  | 0.063 | 7.29E-45 | 19 |
| Thbs1         | -0.391 | 0.96  | 0.063 | 1.85E-44 | 19 |
| Igtp          | -0.281 | 0.987 | 0.081 | 3.37E-44 | 19 |
| Igha          | -0.392 | 1     | 0.09  | 8.48E-44 | 19 |
| Spink4        | -0.262 | 0.96  | 0.069 | 1.86E-42 | 19 |
| Rfk           | 0.387  | 0.933 | 0.057 | 7.69E-42 | 19 |
| Asprv1        | -0.332 | 0.653 | 0.021 | 4.48E-41 | 19 |
| Gm15056       | -0.591 | 0.76  | 0.045 | 2.80E-40 | 19 |
| Serpinb6b     | -0.338 | 0.773 | 0.048 | 2.84E-40 | 19 |
| Serpina3g     | -0.278 | 1     | 0.102 | 4.81E-40 | 19 |
| Pglyrp1       | -0.495 | 0.973 | 0.087 | 1.16E-39 | 19 |
| Igkc          | -0.467 | 1     | 0.105 | 2.82E-39 | 19 |
| Il12b         | -0.584 | 0.733 | 0.042 | 3.21E-39 | 19 |
| AA467197      | -0.300 | 0.893 | 0.042 | 7.40E-39 | 19 |
| Trac          | -0.428 | 0.813 | 0.06  | 2.19E-37 | 19 |
| Tmem119       | 0.516  | 0.8   | 0.069 | 6.47E-37 | 19 |
| Pstpip1       | 0.259  | 0.867 | 0.069 | 2.90E-36 | 19 |
| Wars          | -0.258 | 0.973 | 0.099 | 4.33E-36 | 19 |
| Ly6c1         | -0.424 | 0.973 | 0.105 | 4.87E-36 | 19 |
| Trbv1         | -0.252 | 0.92  | 0.096 | 5.51E-36 | 19 |
| Hdc           | 0.522  | 0.813 | 0.066 | 7.44E-36 | 19 |
| Klrk1         | -0.257 | 0.813 | 0.063 | 1.05E-34 | 19 |
| Lat           | 0.486  | 0.173 | 0.006 | 4.70E-34 | 19 |
| Hyal2         | 0.278  | 0.173 | 0     | 2.00E-32 | 19 |
| Spib          | -0.390 | 0.747 | 0.045 | 1.07E-31 | 19 |
| Krt19         | -0.271 | 0.973 | 0.12  | 5.03E-31 | 19 |
| Arg1          | -0.250 | 0.747 | 0.042 | 7.11E-31 | 19 |
| Fn1           | 0.518  | 0.973 | 0.133 | 4.26E-30 | 19 |
| Slc2a6        | 0.346  | 0.733 | 0.033 | 1.61E-29 | 19 |
| Tnip3         | -0.327 | 0.84  | 0.102 | 2.70E-29 | 19 |

|               |        |       |       |          |    |
|---------------|--------|-------|-------|----------|----|
| Il1r2         | 0.335  | 0.8   | 0.057 | 3.44E-29 | 19 |
| Ogfrl1        | -0.330 | 0.987 | 0.142 | 4.16E-29 | 19 |
| Ltb           | -0.373 | 0.987 | 0.145 | 5.03E-29 | 19 |
| Slc40a1       | 0.382  | 0.12  | 0.012 | 5.57E-29 | 19 |
| Il7r          | -0.301 | 0.773 | 0.057 | 1.24E-28 | 19 |
| Ifitm6        | -0.429 | 0.827 | 0.105 | 4.52E-28 | 19 |
| Clec9a        | -0.470 | 0.747 | 0.081 | 6.42E-28 | 19 |
| Ccl5          | -0.572 | 0.987 | 0.154 | 9.67E-28 | 19 |
| Klk8          | 0.375  | 0.12  | 0.015 | 1.17E-27 | 19 |
| Car2          | -0.358 | 0.96  | 0.13  | 7.72E-27 | 19 |
| Pilra         | 0.512  | 0.813 | 0.114 | 1.13E-26 | 19 |
| S100a10       | 0.398  | 0.96  | 0.163 | 2.21E-26 | 19 |
| Lag3          | -0.332 | 0.12  | 0.075 | 3.19E-26 | 19 |
| Ly6a          | -0.263 | 1     | 0.16  | 5.38E-26 | 19 |
| Id3           | 0.290  | 0.907 | 0.102 | 1.18E-25 | 19 |
| Cd8a          | -0.314 | 0.56  | 0.042 | 1.19E-25 | 19 |
| Cd300ld       | 0.270  | 0.12  | 0.042 | 1.21E-25 | 19 |
| Creld2        | 0.306  | 0.893 | 0.09  | 1.40E-25 | 19 |
| Hcar2         | -0.282 | 0.133 | 0.054 | 1.54E-25 | 19 |
| Tpm1          | 0.296  | 0.907 | 0.105 | 3.45E-25 | 19 |
| Gfpt1         | -0.424 | 1     | 0.166 | 4.57E-25 | 19 |
| Agr2          | -0.271 | 1     | 0.172 | 4.83E-24 | 19 |
| Csf3r         | 0.479  | 0.813 | 0.12  | 6.76E-24 | 19 |
| Gm26825       | 0.255  | 0.88  | 0.087 | 8.34E-24 | 19 |
| I830077J02Rik | -0.279 | 0.787 | 0.111 | 9.72E-24 | 19 |
| Mcomp1        | -0.274 | 0.827 | 0.123 | 9.73E-24 | 19 |
| Epsti1        | -0.350 | 0.933 | 0.139 | 7.28E-23 | 19 |
| Atp4a         | -0.288 | 0.92  | 0.123 | 1.03E-22 | 19 |
| Cd69          | -0.426 | 0.84  | 0.102 | 1.40E-22 | 19 |
| Tnni3         | -0.281 | 0.227 | 0.048 | 1.45E-22 | 19 |
| Far1          | -0.432 | 0.973 | 0.163 | 1.93E-22 | 19 |
| Ptgs1         | -0.258 | 0.147 | 0.06  | 4.05E-22 | 19 |
| Slpi          | 0.404  | 0.173 | 0.081 | 4.59E-22 | 19 |
| Il2rg         | 0.266  | 0.96  | 0.166 | 8.35E-22 | 19 |
| Rnase6        | -0.471 | 0.88  | 0.142 | 1.35E-21 | 19 |
| Cxcl9         | -0.575 | 1     | 0.187 | 1.57E-21 | 19 |
| Smim24        | 0.355  | 0.813 | 0.075 | 1.15E-20 | 19 |
| Saa3          | -1.455 | 0.133 | 0.045 | 1.39E-20 | 19 |
| Serpine2      | 0.376  | 0.16  | 0.006 | 3.02E-20 | 19 |
| Slbp          | -0.264 | 0.24  | 0.111 | 2.65E-19 | 19 |
| Ly6c2         | -0.864 | 0.907 | 0.172 | 9.52E-19 | 19 |
| Nr4a3         | -0.310 | 0.907 | 0.172 | 2.28E-18 | 19 |
| Folr2         | 0.431  | 0.173 | 0     | 4.33E-18 | 19 |
| Fcna          | 0.495  | 0.173 | 0.027 | 7.22E-18 | 19 |
| Muc6          | -0.371 | 1     | 0.205 | 8.01E-18 | 19 |
| Ccl7          | 0.849  | 0.187 | 0.033 | 8.76E-18 | 19 |
| Pla2g2d       | 0.425  | 0.187 | 0.054 | 1.01E-17 | 19 |
| Flt3          | -0.509 | 0.747 | 0.133 | 5.41E-17 | 19 |
| Ckmt1         | 0.517  | 0.267 | 0.027 | 1.15E-16 | 19 |
| Cxcl14        | 0.337  | 0.173 | 0.012 | 1.33E-16 | 19 |

|           |        |       |       |          |    |
|-----------|--------|-------|-------|----------|----|
| Tipin     | 0.364  | 0.267 | 0.042 | 2.31E-16 | 19 |
| Ccl8      | -0.986 | 0.947 | 0.205 | 3.66E-16 | 19 |
| Csf2rb2   | -0.288 | 0.84  | 0.166 | 4.58E-16 | 19 |
| S100a4    | -0.327 | 0.973 | 0.217 | 1.03E-15 | 19 |
| Ccl12     | 0.527  | 0.187 | 0.054 | 1.41E-15 | 19 |
| Adgrg5    | -0.556 | 0.773 | 0.142 | 3.32E-15 | 19 |
| Me2       | -0.286 | 0.84  | 0.111 | 3.52E-14 | 19 |
| Edem1     | -0.297 | 0.907 | 0.169 | 4.66E-14 | 19 |
| Fgl2      | -0.360 | 0.973 | 0.223 | 5.53E-14 | 19 |
| Wdfy4     | -0.716 | 0.267 | 0.193 | 8.83E-14 | 19 |
| Capg      | 0.466  | 0.84  | 0.133 | 1.04E-13 | 19 |
| Cpa3      | 0.596  | 0.253 | 0.009 | 1.16E-13 | 19 |
| Sprr2a3   | -0.550 | 1     | 0.238 | 1.22E-13 | 19 |
| Fxyd2     | 0.311  | 0.24  | 0.021 | 1.94E-13 | 19 |
| Ncf2      | 0.369  | 0.92  | 0.256 | 3.91E-13 | 19 |
| Hist1h2ap | -0.466 | 0.293 | 0.063 | 6.01E-13 | 19 |
| Lyz1      | 0.597  | 0.613 | 0.021 | 1.63E-12 | 19 |
| Gsr       | -0.255 | 0.893 | 0.172 | 1.65E-12 | 19 |
| Anxa1     | -0.706 | 0.88  | 0.181 | 6.38E-12 | 19 |
| Cbr2      | 0.325  | 0.227 | 0.006 | 1.14E-11 | 19 |
| H2-DMb2   | 0.346  | 1     | 0.313 | 2.44E-11 | 19 |
| Sla       | -0.369 | 0.893 | 0.223 | 4.04E-11 | 19 |
| Spp1      | 0.301  | 0.293 | 0.093 | 5.36E-11 | 19 |
| Pkib      | -0.446 | 0.24  | 0.175 | 5.83E-11 | 19 |
| Oasl1     | 0.320  | 0.307 | 0.054 | 7.19E-11 | 19 |
| Pik3r5    | -0.284 | 0.28  | 0.142 | 8.61E-11 | 19 |
| Irf1      | -0.400 | 0.893 | 0.19  | 2.47E-10 | 19 |
| Ccl2      | 1.170  | 0.28  | 0.09  | 2.65E-10 | 19 |
| Iglc3     | -0.260 | 0.347 | 0.033 | 5.01E-10 | 19 |
| Samsn1    | -0.493 | 0.8   | 0.187 | 5.09E-10 | 19 |
| Cks2      | -0.310 | 0.773 | 0.09  | 1.40E-09 | 19 |
| Ifi203    | -0.326 | 0.293 | 0.181 | 1.67E-09 | 19 |
| Cym       | -0.654 | 1     | 0.28  | 2.20E-09 | 19 |
| Nr4a2     | -0.614 | 0.933 | 0.232 | 2.81E-09 | 19 |
| mt-Nd3    | -0.658 | 0.987 | 0.265 | 3.03E-09 | 19 |
| Gkn3      | -0.405 | 0.747 | 0.069 | 3.85E-09 | 19 |
| Fcgr4     | -0.428 | 0.76  | 0.175 | 3.98E-09 | 19 |
| Gif       | 0.454  | 0.853 | 0.19  | 5.29E-09 | 19 |
| Pla2g7    | 0.361  | 0.853 | 0.283 | 7.03E-09 | 19 |
| Hmgn2     | -0.517 | 0.333 | 0.181 | 7.21E-09 | 19 |
| Gstp1     | 0.334  | 0.867 | 0.214 | 8.95E-09 | 19 |
| Ube2s     | -0.298 | 0.867 | 0.187 | 1.29E-08 | 19 |
| Dnase1l3  | -0.518 | 0.8   | 0.214 | 1.61E-08 | 19 |
| Emp3      | 0.595  | 0.96  | 0.334 | 1.94E-08 | 19 |
| Lmo2      | -0.288 | 0.307 | 0.123 | 3.44E-08 | 19 |
| Hes1      | -0.289 | 0.733 | 0.066 | 3.63E-08 | 19 |
| Clec12a   | -0.296 | 0.827 | 0.238 | 3.92E-08 | 19 |
| Gngt2     | 0.465  | 0.84  | 0.262 | 4.36E-08 | 19 |
| Gadd45b   | 0.375  | 0.92  | 0.286 | 2.20E-07 | 19 |
| Nupr1     | 0.313  | 0.773 | 0.13  | 2.39E-07 | 19 |

|          |        |       |       |             |    |
|----------|--------|-------|-------|-------------|----|
| Vcam1    | -0.295 | 0.76  | 0.172 | 4.48E-07    | 19 |
| Ppt1     | -0.348 | 0.987 | 0.307 | 4.87E-07    | 19 |
| Zfp3612  | 0.335  | 1     | 0.38  | 9.00E-07    | 19 |
| Cd300ld3 | 0.372  | 0.253 | 0.036 | 1.66E-06    | 19 |
| Osm      | -0.253 | 0.84  | 0.265 | 1.91E-06    | 19 |
| Ncf4     | 0.332  | 0.827 | 0.286 | 3.00E-06    | 19 |
| Cd200    | -0.308 | 0.44  | 0.066 | 7.96E-06    | 19 |
| Tnfaip2  | -0.493 | 0.787 | 0.217 | 9.63E-06    | 19 |
| Mafb     | 0.579  | 0.84  | 0.334 | 1.01E-05    | 19 |
| Dnajb1   | 0.412  | 0.36  | 0.187 | 1.28E-05    | 19 |
| Gm3839   | 0.302  | 0.36  | 0.072 | 1.89E-05    | 19 |
| Arhgdib  | 0.293  | 0.96  | 0.419 | 2.51E-05    | 19 |
| Hpgd     | 0.292  | 0.36  | 0.006 | 3.79E-05    | 19 |
| Bcl2a1b  | 0.382  | 0.92  | 0.364 | 4.60E-05    | 19 |
| Pde4b    | 0.521  | 0.96  | 0.383 | 5.38E-05    | 19 |
| Cnn2     | -0.271 | 0.907 | 0.304 | 5.47E-05    | 19 |
| AW112010 | 0.372  | 1     | 0.419 | 6.27E-05    | 19 |
| Naaa     | -0.772 | 0.813 | 0.241 | 9.96E-05    | 19 |
| Ccl24    | -0.263 | 0.293 | 0.114 | 0.000133893 | 19 |
| Vim      | 0.731  | 0.987 | 0.488 | 0.000169797 | 19 |
| Cebpd    | 0.351  | 0.373 | 0.072 | 0.00026971  | 19 |
| Fxyd5    | 0.523  | 1     | 0.497 | 0.000346285 | 19 |
| Hck      | -0.303 | 0.72  | 0.205 | 0.000365518 | 19 |
| Tph1     | 0.974  | 0.133 | 0.012 | 0.00046318  | 19 |
| Ghrl     | 0.393  | 1     | 0.377 | 0.000562579 | 19 |
| Fcgr2b   | 0.256  | 0.84  | 0.389 | 0.000823566 | 19 |
| Il1rn    | -0.295 | 0.813 | 0.286 | 0.001519783 | 19 |
| Cd300c2  | 0.401  | 0.84  | 0.373 | 0.001980299 | 19 |
| Runx3    | -0.273 | 0.92  | 0.343 | 0.002151491 | 19 |
| Aif1     | 0.512  | 0.853 | 0.416 | 0.002152196 | 19 |
| Pf4      | -0.260 | 0.307 | 0.045 | 0.002361754 | 19 |
| lfrd1    | 0.272  | 0.933 | 0.401 | 0.002775825 | 19 |
| Icam1    | -0.336 | 0.427 | 0.217 | 0.003855041 | 19 |
| Cdkn1a   | 0.355  | 0.933 | 0.401 | 0.004629506 | 19 |
| Tnfaip3  | -0.268 | 0.88  | 0.307 | 0.008980773 | 19 |
| Cd8b1    | -0.405 | 0.187 | 0.039 | 0.022035359 | 19 |
| Hspa1b   | -0.280 | 1     | 0.41  | 0.024099685 | 19 |
| Gm26917  | -0.585 | 1     | 0.398 | 0.024624871 | 19 |
| Basp1    | 0.297  | 0.867 | 0.352 | 0.033228579 | 19 |
| Cd74     | 1.315  | 1     | 0.88  | 0.034681246 | 19 |
| Hpgds    | 0.653  | 0.36  | 0.087 | 0.038378026 | 19 |
| Ucp2     | 0.528  | 0.96  | 0.66  | 0.040087854 | 19 |
| Tmem176b | 0.381  | 0.867 | 0.389 | 0.054008121 | 19 |
| Ctss     | 0.478  | 0.987 | 0.669 | 0.059841487 | 19 |
| Lgals3   | 0.336  | 0.907 | 0.431 | 0.064486826 | 19 |
| Srgn     | 0.745  | 0.907 | 0.654 | 0.089177521 | 19 |
| Ccr2     | -0.299 | 0.853 | 0.334 | 0.09763748  | 19 |
| H2-DMa   | 0.488  | 1     | 0.584 | 0.133057918 | 19 |
| Itgax    | -0.577 | 0.8   | 0.307 | 0.251357195 | 19 |
| Fam46c   | -0.270 | 0.773 | 0.22  | 0.302788405 | 19 |



|          |        |       |       |             |    |
|----------|--------|-------|-------|-------------|----|
| Selp1g   | -0.322 | 0.427 | 0.289 | 0.31407719  | 19 |
| Irf8     | -0.407 | 0.987 | 0.41  | 0.31885346  | 19 |
| Ms4a4a   | 0.476  | 0.587 | 0.117 | 0.381551314 | 19 |
| Lsp1     | -0.587 | 0.867 | 0.352 | 0.442883342 | 19 |
| Tgfb1    | 0.302  | 0.813 | 0.419 | 0.510650792 | 19 |
| Plac8    | -1.305 | 1     | 0.392 | 0.630262979 | 19 |
| H2-Aa    | 1.133  | 1     | 0.849 | 0.735740238 | 19 |
| Cd53     | -0.253 | 0.947 | 0.398 | 0.743720763 | 19 |
| Lgals2   | -0.328 | 0.453 | 0.142 | 0.808044318 | 19 |
| Adgre1   | -0.627 | 0.387 | 0.172 | 1           | 19 |
| Tnfsf13  | 0.325  | 0.36  | 0.054 | 1           | 19 |
| H2-Eb1   | 1.068  | 1     | 0.819 | 1           | 19 |
| C1qb     | -0.340 | 0.827 | 0.343 | 1           | 19 |
| Ighm     | -0.452 | 0.48  | 0.196 | 1           | 19 |
| Irf7     | 0.257  | 0.467 | 0.163 | 1           | 19 |
| Rpl9-ps6 | 0.375  | 0.907 | 0.569 | 1           | 19 |
| Malat1   | -0.383 | 1     | 0.97  | 1           | 19 |
| S100a6   | 0.412  | 1     | 0.488 | 1           | 19 |
| Lilrb4a  | -0.258 | 0.453 | 0.148 | 1           | 19 |
| Tmem176a | 0.259  | 0.8   | 0.349 | 1           | 19 |
| H2-Ab1   | 0.999  | 1     | 0.822 | 1           | 19 |
| C1qc     | -0.372 | 0.813 | 0.352 | 1           | 19 |
| Il1b     | 0.847  | 0.867 | 0.545 | 1           | 19 |
| Ly86     | 0.277  | 0.68  | 0.316 | 1           | 19 |
| Bst2     | -0.419 | 0.8   | 0.307 | 1           | 19 |
| Zfp36    | 0.494  | 0.867 | 0.684 | 1           | 19 |
| Rgs10    | 0.437  | 0.747 | 0.331 | 1           | 19 |
| Rps29    | 0.259  | 1     | 0.925 | 1           | 19 |
| Clps     | -0.344 | 1     | 0.807 | 1           | 19 |
| Igfbp4   | 0.566  | 0.573 | 0.042 | 1           | 19 |
| Fabp5    | -0.361 | 0.68  | 0.166 | 1           | 19 |
| Id2      | -0.380 | 0.973 | 0.464 | 1           | 19 |
| Gkn2     | 0.374  | 0.747 | 0.289 | 1           | 19 |
| ApoE     | -0.321 | 0.947 | 0.539 | 1           | 19 |
| Ms4a7    | 0.344  | 0.613 | 0.193 | 1           | 19 |
| Ier3     | 0.771  | 0.733 | 0.337 | 1           | 19 |
| Prr13    | -0.351 | 0.613 | 0.373 | 1           | 19 |
| AY036118 | -0.428 | 1     | 0.563 | 1           | 19 |
| Nfkbia   | 0.393  | 0.8   | 0.536 | 1           | 19 |
| C1qa     | -0.292 | 0.827 | 0.38  | 1           | 19 |
| Cd52     | 0.270  | 1     | 0.663 | 1           | 19 |
| Neat1    | -0.291 | 0.933 | 0.503 | 1           | 19 |
| Tnf      | 0.297  | 0.56  | 0.096 | 1           | 19 |
| Birc5    | -0.255 | 0.28  | 0.048 | 1           | 19 |
| Limd2    | 0.317  | 0.68  | 0.265 | 1           | 19 |
| Atf3     | -0.307 | 0.653 | 0.476 | 1           | 19 |
| Coro1a   | 0.260  | 0.867 | 0.548 | 1           | 19 |
| Mpeg1    | -0.380 | 0.893 | 0.515 | 1           | 19 |
| Gkn1     | 0.270  | 0.773 | 0.404 | 1           | 19 |
| Gm26532  | 1.031  | 0.533 | 0.229 | 1           | 19 |

|          |        |       |       |          |    |
|----------|--------|-------|-------|----------|----|
| H2-K1    | 0.392  | 1     | 0.858 | 1        | 19 |
| Trem2    | -0.341 | 0.44  | 0.099 | 1        | 19 |
| Spi1     | 0.320  | 0.667 | 0.47  | 1        | 19 |
| Ptprc    | -0.284 | 1     | 0.596 | 1        | 19 |
| Tff1     | 0.313  | 0.907 | 0.657 | 1        | 19 |
| Hmgb2    | -0.862 | 0.72  | 0.289 | 1        | 19 |
| Sirpa    | -0.382 | 0.707 | 0.413 | 1        | 19 |
| Lgmn     | -0.289 | 0.773 | 0.407 | 1        | 19 |
| Lrg1     | -0.524 | 0.52  | 0.051 | 1        | 19 |
| Stmn1    | -0.495 | 0.547 | 0.066 | 1        | 19 |
| Actb     | -0.270 | 0.96  | 0.952 | 1        | 19 |
| Rps2     | -0.636 | 0.947 | 0.566 | 1        | 19 |
| Chgb     | -0.282 | 0.885 | 0.004 | 3.06E-63 | 20 |
| Sst      | 0.390  | 0.969 | 0.052 | 3.14E-48 | 20 |
| Parm1    | -0.291 | 1     | 0.081 | 1.12E-45 | 20 |
| Olfm4    | -0.278 | 0.969 | 0.1   | 3.38E-38 | 20 |
| Muc4     | -0.323 | 0.948 | 0.096 | 1.19E-37 | 20 |
| Fam13a   | -0.435 | 0.99  | 0.114 | 4.60E-35 | 20 |
| Igkc     | -0.347 | 1     | 0.133 | 2.55E-32 | 20 |
| Chil4    | -0.603 | 0.708 | 0.052 | 6.41E-32 | 20 |
| Cd177    | -1.014 | 0.917 | 0.111 | 6.76E-32 | 20 |
| Scgb2b20 | -1.063 | 0.948 | 0.118 | 3.33E-31 | 20 |
| Col18a1  | -0.253 | 1     | 0.151 | 2.64E-28 | 20 |
| Pgc      | 1.186  | 1     | 0.915 | 2.18E-26 | 20 |
| H2-DMb2  | 0.430  | 1     | 0.214 | 2.90E-25 | 20 |
| Mt3      | 0.341  | 0.958 | 0.159 | 2.90E-25 | 20 |
| Hist1h4n | -0.255 | 1     | 0.17  | 5.42E-25 | 20 |
| Plet1    | -0.270 | 0.927 | 0.122 | 1.60E-24 | 20 |
| C3       | -0.358 | 0.771 | 0.111 | 1.27E-22 | 20 |
| Bdh2     | -0.367 | 1     | 0.185 | 4.78E-22 | 20 |
| Cym      | -1.943 | 1     | 0.196 | 5.18E-22 | 20 |
| Nme2     | 0.989  | 0.99  | 0.45  | 1.78E-21 | 20 |
| Sprr2a1  | -0.300 | 1     | 0.188 | 2.31E-21 | 20 |
| Itln1    | -0.490 | 0.979 | 0.188 | 6.59E-21 | 20 |
| Iigp1    | -0.605 | 1     | 0.196 | 2.77E-20 | 20 |
| Rnase4   | -0.374 | 0.792 | 0.122 | 2.26E-19 | 20 |
| Dmbt1    | -0.760 | 1     | 0.21  | 7.95E-18 | 20 |
| Thbs1    | -0.474 | 0.948 | 0.181 | 1.98E-17 | 20 |
| Ier3     | -0.257 | 0.26  | 0.118 | 7.14E-17 | 20 |
| Plac8    | -0.304 | 1     | 0.225 | 4.28E-16 | 20 |
| Cebpd    | -0.365 | 0.271 | 0.185 | 8.47E-16 | 20 |
| Gjb1     | -0.306 | 0.281 | 0.225 | 1.09E-15 | 20 |
| Rpl9-ps6 | 0.652  | 0.99  | 0.387 | 7.00E-15 | 20 |
| Ceacam10 | -0.450 | 0.635 | 0.114 | 1.77E-14 | 20 |
| Anxa1    | -0.364 | 0.948 | 0.199 | 2.17E-14 | 20 |
| Chit1    | -0.461 | 1     | 0.244 | 4.08E-13 | 20 |
| Cftr     | -0.641 | 1     | 0.251 | 1.40E-12 | 20 |
| Smpd3    | -0.490 | 0.323 | 0.229 | 3.06E-12 | 20 |
| Phlda1   | -0.479 | 1     | 0.266 | 6.98E-12 | 20 |
| Gstp1    | 0.475  | 0.99  | 0.413 | 8.48E-12 | 20 |

|               |        |       |       |             |    |
|---------------|--------|-------|-------|-------------|----|
| Ttr           | 0.287  | 0.823 | 0.148 | 2.52E-11    | 20 |
| Lrg1          | -0.762 | 0.958 | 0.251 | 4.31E-11    | 20 |
| Reg3g         | -1.306 | 1     | 0.262 | 4.87E-11    | 20 |
| Malat1        | -1.279 | 1     | 0.959 | 7.03E-11    | 20 |
| Smoc2         | -0.484 | 0.927 | 0.214 | 9.60E-11    | 20 |
| Abhd2         | -0.372 | 0.969 | 0.247 | 1.35E-10    | 20 |
| Pigr          | -0.644 | 1     | 0.937 | 3.91E-10    | 20 |
| Car8          | -0.576 | 1     | 0.273 | 6.50E-10    | 20 |
| Id1           | -0.347 | 0.958 | 0.262 | 2.44E-09    | 20 |
| Hmgcs1        | -0.396 | 1     | 0.303 | 8.95E-09    | 20 |
| Tff2          | -0.727 | 1     | 0.889 | 1.22E-08    | 20 |
| Tmem213       | -0.496 | 1     | 0.292 | 1.82E-08    | 20 |
| Ghrl          | -0.450 | 1     | 0.306 | 1.95E-08    | 20 |
| Hist1h1c      | -0.296 | 1     | 0.31  | 3.60E-08    | 20 |
| AY036118      | 0.512  | 1     | 0.461 | 3.63E-08    | 20 |
| Col11a2       | -0.293 | 1     | 0.314 | 2.83E-07    | 20 |
| Gm11361       | -0.376 | 0.823 | 0.162 | 3.38E-07    | 20 |
| Cd44          | -0.341 | 0.979 | 0.299 | 7.21E-07    | 20 |
| Cldn2         | -0.488 | 1     | 0.306 | 7.50E-07    | 20 |
| Pla2g1b       | 0.289  | 0.99  | 0.815 | 8.45E-07    | 20 |
| Gkn3          | -1.083 | 0.885 | 0.863 | 1.06E-06    | 20 |
| Tstd1         | 0.300  | 0.958 | 0.417 | 1.69E-06    | 20 |
| Pgd           | -0.382 | 0.885 | 0.232 | 3.22E-06    | 20 |
| St3gal4       | -0.419 | 1     | 0.314 | 6.35E-06    | 20 |
| 2210407C18Rik | -0.493 | 1     | 0.325 | 1.07E-05    | 20 |
| Tmem54        | -0.290 | 0.958 | 0.295 | 1.08E-05    | 20 |
| Adm           | -0.272 | 0.312 | 0.114 | 1.46E-05    | 20 |
| Mfge8         | -1.029 | 0.979 | 0.738 | 4.95E-05    | 20 |
| Sprr2a3       | -2.241 | 1     | 0.727 | 6.60E-05    | 20 |
| Fkbp11        | 0.307  | 0.99  | 0.528 | 0.000124571 | 20 |
| Cotl1         | -0.348 | 0.417 | 0.203 | 0.000196942 | 20 |
| Hspa1a        | -0.394 | 0.99  | 0.376 | 0.000471589 | 20 |
| Fgfbp1        | 0.281  | 0.729 | 0.148 | 0.000874976 | 20 |
| Itih5         | -0.447 | 0.344 | 0.092 | 0.000929444 | 20 |
| Chga          | -0.255 | 0.656 | 0.03  | 0.001064929 | 20 |
| Ptpn18        | -0.269 | 0.802 | 0.196 | 0.001430884 | 20 |
| Agr2          | 0.293  | 1     | 0.985 | 0.00207833  | 20 |
| Ddit4         | -0.291 | 0.76  | 0.155 | 0.002770615 | 20 |
| Scgb2b7       | -1.752 | 0.917 | 0.292 | 0.004715939 | 20 |
| Clu           | -0.654 | 1     | 0.934 | 0.004853849 | 20 |
| Bpifb1        | -1.724 | 1     | 0.786 | 0.005976544 | 20 |
| Id3           | -0.385 | 1     | 0.391 | 0.006189537 | 20 |
| Hspa1b        | -0.382 | 1     | 0.432 | 0.012422521 | 20 |
| Msmo1         | -0.387 | 0.917 | 0.328 | 0.014940237 | 20 |
| Far1          | -0.288 | 0.948 | 0.362 | 0.022874798 | 20 |
| Insig1        | -0.263 | 1     | 0.417 | 0.06362625  | 20 |
| Ctse          | -0.634 | 1     | 0.705 | 0.065869086 | 20 |
| Spink4        | -2.924 | 1     | 0.664 | 0.074438777 | 20 |
| Sox4          | -0.353 | 0.938 | 0.373 | 0.081338383 | 20 |
| S100a6        | -1.198 | 1     | 0.38  | 0.168411785 | 20 |

|          |        |       |       |             |    |
|----------|--------|-------|-------|-------------|----|
| Car2     | -0.747 | 0.99  | 0.804 | 0.200351317 | 20 |
| Pdia2    | -0.690 | 0.958 | 0.376 | 0.669015791 | 20 |
| C4b      | -0.768 | 1     | 0.391 | 0.899469656 | 20 |
| MIph     | -0.392 | 0.885 | 0.328 | 0.92596301  | 20 |
| Tff1     | -1.187 | 1     | 0.771 | 0.99600223  | 20 |
| Edn1     | -0.347 | 0.698 | 0.144 | 1           | 20 |
| Pglyrp1  | -0.796 | 1     | 0.679 | 1           | 20 |
| Wfdc2    | -0.804 | 1     | 0.734 | 1           | 20 |
| Gadd45g  | -0.461 | 1     | 0.469 | 1           | 20 |
| AW112010 | -0.756 | 1     | 0.402 | 1           | 20 |
| mt-Nd3   | -0.917 | 1     | 0.653 | 1           | 20 |
| Tpm1     | -0.534 | 0.625 | 0.399 | 1           | 20 |
| Neat1    | -0.759 | 1     | 0.812 | 1           | 20 |
| Tmed3    | -0.587 | 0.99  | 0.734 | 1           | 20 |
| Me1      | -0.748 | 1     | 0.41  | 1           | 20 |
| Nupr1    | -1.135 | 0.896 | 0.38  | 1           | 20 |
| Cldn7    | -0.354 | 0.635 | 0.177 | 1           | 20 |
| Igf1     | 0.313  | 0.573 | 0.015 | 1           | 20 |
| Ifrd1    | -0.269 | 0.75  | 0.255 | 1           | 20 |
| Aqp5     | -0.598 | 1     | 0.668 | 1           | 20 |
| Tmed6    | -0.257 | 0.802 | 0.325 | 1           | 20 |
| Chad     | -0.308 | 0.99  | 0.498 | 1           | 20 |
| Ces1f    | -0.390 | 0.719 | 0.214 | 1           | 20 |
| S100a1   | -0.565 | 1     | 0.745 | 1           | 20 |
| Ctsl     | -0.363 | 0.698 | 0.476 | 1           | 20 |
| Chia1    | -0.410 | 0.771 | 0.31  | 1           | 20 |
| Gkn1     | -1.404 | 0.865 | 0.601 | 1           | 20 |
| S100a13  | -0.527 | 1     | 0.491 | 1           | 20 |
| Ifitm3   | -0.537 | 1     | 0.498 | 1           | 20 |
| Pam      | -0.796 | 0.927 | 0.417 | 1           | 20 |
| Gcnt3    | -0.530 | 0.865 | 0.557 | 1           | 20 |
| Krt8     | -0.434 | 1     | 0.815 | 1           | 20 |
| Hes1     | -0.351 | 0.844 | 0.432 | 1           | 20 |
| Gpx2     | -0.378 | 1     | 0.738 | 1           | 20 |
| AA467197 | -0.381 | 0.312 | 0.181 | 1           | 20 |
| Gsto1    | -0.441 | 0.99  | 0.638 | 1           | 20 |
| Hgfac    | -0.833 | 0.979 | 0.472 | 1           | 20 |
| Tesc     | -0.364 | 0.719 | 0.402 | 1           | 20 |
| Nfe2l2   | -0.382 | 0.698 | 0.362 | 1           | 20 |
| Rps2     | -0.411 | 1     | 0.72  | 1           | 20 |
| Cyba     | -0.386 | 0.729 | 0.284 | 1           | 20 |
| H2afz    | -0.422 | 0.969 | 0.675 | 1           | 20 |
| Gkn2     | -1.072 | 0.76  | 0.432 | 1           | 20 |
| Ggh      | -0.431 | 0.948 | 0.587 | 1           | 20 |
| Id2      | -0.465 | 1     | 0.546 | 1           | 20 |
| Snhg18   | -0.527 | 0.99  | 0.638 | 1           | 20 |
| Wfdc18   | -1.607 | 1     | 0.491 | 1           | 20 |
| Cxcl17   | -0.492 | 1     | 0.535 | 1           | 20 |
| Anpep    | -0.336 | 0.781 | 0.399 | 1           | 20 |
| Rps15    | -0.264 | 1     | 0.76  | 1           | 20 |

|           |        |       |       |          |    |
|-----------|--------|-------|-------|----------|----|
| Psca      | -0.512 | 0.708 | 0.303 | 1        | 20 |
| Clic1     | -0.454 | 0.833 | 0.476 | 1        | 20 |
| Ifi2712b  | -0.350 | 0.604 | 0.151 | 1        | 20 |
| Galnt6    | -0.795 | 1     | 0.498 | 1        | 20 |
| Chka      | -0.581 | 0.708 | 0.358 | 1        | 20 |
| Klk1      | -0.820 | 0.979 | 0.55  | 1        | 20 |
| Nfkbia    | -0.290 | 0.646 | 0.277 | 1        | 20 |
| Rpl17     | -0.250 | 1     | 0.705 | 1        | 20 |
| Mgst2     | -0.519 | 1     | 0.55  | 1        | 20 |
| Cgref1    | -0.512 | 1     | 0.616 | 1        | 20 |
| Golm1     | -0.354 | 0.99  | 0.701 | 1        | 20 |
| Prr13     | -0.352 | 1     | 0.583 | 1        | 20 |
| Bace2     | -0.332 | 0.938 | 0.587 | 1        | 20 |
| Mgst3     | -0.448 | 0.792 | 0.421 | 1        | 20 |
| Muc6      | -0.308 | 1     | 0.993 | 1        | 20 |
| Top2a     | -0.278 | 0.996 | 0.038 | 1.35E-46 | 21 |
| Dmbt1     | -0.290 | 0.996 | 0.045 | 1.95E-45 | 21 |
| Jchain    | -0.401 | 0.991 | 0.061 | 6.70E-42 | 21 |
| Pigr      | -0.256 | 1     | 0.076 | 1.44E-39 | 21 |
| Gkn3      | -0.415 | 1     | 0.076 | 1.49E-39 | 21 |
| Trbc1     | -0.323 | 0.862 | 0.023 | 7.28E-39 | 21 |
| Ctse      | -0.386 | 1     | 0.083 | 3.62E-38 | 21 |
| Cxcl9     | -0.635 | 0.957 | 0.068 | 5.98E-38 | 21 |
| Igkc      | -0.357 | 0.966 | 0.076 | 7.82E-37 | 21 |
| Serpina3g | -0.346 | 0.991 | 0.091 | 6.18E-36 | 21 |
| Muc6      | -0.290 | 1     | 0.098 | 2.62E-35 | 21 |
| AA467197  | -0.315 | 0.823 | 0.023 | 6.82E-35 | 21 |
| Gast      | -0.287 | 0.884 | 0.053 | 7.65E-35 | 21 |
| Ili4i1    | -0.301 | 0.823 | 0.038 | 4.13E-33 | 21 |
| Preli2    | -0.250 | 0.129 | 0.061 | 4.10E-31 | 21 |
| Csf2rb    | -0.470 | 0.802 | 0.045 | 2.88E-30 | 21 |
| Iigp1     | -0.330 | 1     | 0.129 | 6.10E-30 | 21 |
| Colq      | -0.259 | 0.815 | 0.053 | 6.88E-30 | 21 |
| Srgn      | -0.386 | 0.914 | 0.083 | 2.36E-29 | 21 |
| H2-Eb1    | -0.547 | 1     | 0.136 | 1.37E-28 | 21 |
| Nr4a3     | -0.251 | 0.879 | 0.061 | 1.90E-28 | 21 |
| Ubd       | -0.668 | 1     | 0.136 | 1.98E-28 | 21 |
| Igtp      | -0.339 | 0.983 | 0.129 | 1.58E-27 | 21 |
| Cxcl5     | -0.791 | 0.815 | 0.068 | 2.06E-27 | 21 |
| Serpina1b | -0.569 | 0.853 | 0.083 | 3.37E-27 | 21 |
| Soat1     | -0.276 | 0.155 | 0.053 | 6.02E-27 | 21 |
| Fabp3     | 0.292  | 0.151 | 0.008 | 1.34E-26 | 21 |
| Lgals4    | -0.281 | 0.892 | 0.061 | 1.36E-24 | 21 |
| Cpe       | -0.508 | 0.884 | 0.053 | 2.06E-24 | 21 |
| Pla2g10   | -0.272 | 0.888 | 0.068 | 2.79E-23 | 21 |
| Ptch1     | 0.273  | 0.927 | 0.144 | 1.02E-22 | 21 |
| G0s2      | -0.335 | 0.155 | 0.106 | 1.37E-21 | 21 |
| Nr4a2     | -0.637 | 0.987 | 0.174 | 3.12E-21 | 21 |
| Cilp      | -0.660 | 0.853 | 0.129 | 9.18E-21 | 21 |
| Gm26825   | -0.491 | 0.694 | 0.053 | 2.59E-20 | 21 |

|               |        |       |       |          |    |
|---------------|--------|-------|-------|----------|----|
| Gm3336        | -0.369 | 0.849 | 0.061 | 3.34E-20 | 21 |
| Cxcl13        | -1.117 | 0.866 | 0.098 | 1.25E-19 | 21 |
| Gm11808       | -0.267 | 0.909 | 0.121 | 4.93E-19 | 21 |
| Il6           | -0.680 | 0.728 | 0.083 | 5.46E-19 | 21 |
| Cotl1         | -0.455 | 0.966 | 0.174 | 8.19E-19 | 21 |
| Has1          | -0.371 | 0.836 | 0.144 | 2.74E-18 | 21 |
| Ccl19         | -0.287 | 0.746 | 0.053 | 3.68E-18 | 21 |
| Sulf1         | -0.497 | 0.909 | 0.182 | 4.86E-17 | 21 |
| Ckmt1         | -0.256 | 0.228 | 0.045 | 1.31E-16 | 21 |
| Agr2          | -0.493 | 0.931 | 0.167 | 5.62E-16 | 21 |
| H2-Aa         | -0.371 | 1     | 0.227 | 7.45E-16 | 21 |
| Tmem189       | -0.594 | 0.634 | 0.076 | 3.12E-15 | 21 |
| Gas7          | -0.274 | 0.858 | 0.136 | 7.23E-15 | 21 |
| Nsg1          | 0.260  | 0.207 | 0.038 | 3.88E-14 | 21 |
| Cym           | -0.640 | 1     | 0.242 | 4.44E-14 | 21 |
| Tnfaip6       | -0.743 | 0.905 | 0.205 | 5.18E-14 | 21 |
| Gfpt2         | -0.352 | 0.845 | 0.189 | 3.26E-13 | 21 |
| Krt8          | -1.145 | 0.991 | 0.242 | 3.94E-13 | 21 |
| Hmox1         | -0.356 | 0.267 | 0.083 | 4.03E-13 | 21 |
| Gfra2         | -0.529 | 0.845 | 0.189 | 4.76E-13 | 21 |
| 2200002D01Rik | -0.330 | 0.612 | 0.061 | 9.53E-13 | 21 |
| Ltf           | -0.735 | 0.405 | 0.008 | 1.06E-12 | 21 |
| Clu           | -1.355 | 1     | 0.265 | 2.35E-12 | 21 |
| Grem1         | -1.197 | 0.849 | 0.136 | 2.61E-12 | 21 |
| Gbp4          | -0.342 | 0.828 | 0.098 | 2.82E-12 | 21 |
| Anxa10        | -0.461 | 0.853 | 0.129 | 4.63E-12 | 21 |
| Lypd8         | -0.652 | 0.845 | 0.121 | 6.87E-12 | 21 |
| Pi16          | -0.710 | 0.263 | 0.273 | 1.06E-11 | 21 |
| Wars          | -0.273 | 0.28  | 0.076 | 1.74E-11 | 21 |
| Dclk1         | -0.302 | 0.901 | 0.197 | 2.57E-11 | 21 |
| Maf           | -0.456 | 0.836 | 0.159 | 6.55E-11 | 21 |
| Col5a3        | -0.423 | 0.858 | 0.22  | 8.61E-11 | 21 |
| Usp50         | -0.429 | 0.582 | 0.068 | 1.31E-10 | 21 |
| Gm3776        | -0.476 | 0.272 | 0.053 | 1.35E-10 | 21 |
| Chl1          | -0.758 | 0.776 | 0.121 | 1.68E-10 | 21 |
| Krt19         | -1.240 | 0.922 | 0.212 | 4.32E-10 | 21 |
| Adgrd1        | -0.331 | 0.793 | 0.129 | 4.74E-10 | 21 |
| Osr1          | -0.281 | 0.293 | 0.144 | 6.31E-10 | 21 |
| Gm26917       | -0.387 | 1     | 0.288 | 7.85E-10 | 21 |
| Col8a1        | -0.865 | 0.836 | 0.205 | 8.64E-10 | 21 |
| Sfrp4         | -0.252 | 0.741 | 0.076 | 1.13E-09 | 21 |
| Cpxm1         | -0.573 | 0.845 | 0.182 | 1.16E-09 | 21 |
| Ccl7          | -1.094 | 0.845 | 0.212 | 1.47E-09 | 21 |
| Cav1          | -0.392 | 0.31  | 0.136 | 2.89E-09 | 21 |
| Tnfaip2       | -0.411 | 0.853 | 0.235 | 4.72E-09 | 21 |
| Il33          | -0.511 | 0.866 | 0.197 | 4.90E-09 | 21 |
| Cbr3          | -0.315 | 0.315 | 0.106 | 5.97E-09 | 21 |
| 2210407C18Rik | -0.845 | 0.957 | 0.265 | 1.08E-08 | 21 |
| Rarres1       | 0.320  | 0.224 | 0.023 | 2.98E-08 | 21 |
| Sprr2a1       | -0.308 | 0.526 | 0.045 | 8.84E-08 | 21 |

|               |        |       |       |             |    |
|---------------|--------|-------|-------|-------------|----|
| Ebf1          | -0.716 | 0.828 | 0.167 | 1.12E-07    | 21 |
| Sox4          | -0.262 | 0.845 | 0.182 | 1.84E-07    | 21 |
| Gbp2b         | -0.268 | 0.776 | 0.106 | 5.93E-07    | 21 |
| Car2          | -0.872 | 0.918 | 0.25  | 1.04E-06    | 21 |
| Igfbp6        | -0.443 | 0.397 | 0.326 | 1.36E-06    | 21 |
| Sod3          | -0.880 | 0.483 | 0.417 | 1.54E-06    | 21 |
| Gm3839        | 0.426  | 0.319 | 0.045 | 2.07E-06    | 21 |
| Pim1          | -0.458 | 0.841 | 0.205 | 2.14E-06    | 21 |
| Degs2         | -0.250 | 0.56  | 0.053 | 2.68E-06    | 21 |
| Mfap5         | -0.391 | 0.353 | 0.189 | 2.99E-06    | 21 |
| Sprrr2a3      | -0.958 | 1     | 0.318 | 3.76E-06    | 21 |
| Pga5          | -0.648 | 0.703 | 0.038 | 4.26E-06    | 21 |
| Lbh           | -0.452 | 0.832 | 0.182 | 5.49E-06    | 21 |
| Gxylt2        | -0.432 | 0.711 | 0.144 | 6.70E-06    | 21 |
| Sptssb        | -0.559 | 0.763 | 0.106 | 6.86E-06    | 21 |
| Pttg1         | -0.271 | 0.185 | 0.038 | 6.86E-06    | 21 |
| Plk2          | 0.259  | 0.711 | 0.045 | 9.66E-06    | 21 |
| Slit3         | -0.409 | 0.349 | 0.182 | 1.14E-05    | 21 |
| mt-Nd3        | -0.708 | 0.991 | 0.326 | 1.30E-05    | 21 |
| Hes1          | -0.297 | 0.832 | 0.197 | 1.69E-05    | 21 |
| Gas1          | -0.443 | 0.849 | 0.28  | 1.75E-05    | 21 |
| Plat          | -0.366 | 0.836 | 0.227 | 3.40E-05    | 21 |
| Gm12840       | -0.283 | 0.591 | 0.038 | 7.82E-05    | 21 |
| Adam23        | -0.336 | 0.28  | 0.045 | 0.00014502  | 21 |
| Vcam1         | -0.811 | 0.815 | 0.25  | 0.000235533 | 21 |
| Eln           | -1.148 | 0.547 | 0.462 | 0.000327338 | 21 |
| Ctrb1         | -0.551 | 0.164 | 0.008 | 0.000358006 | 21 |
| Edem1         | -0.279 | 0.754 | 0.129 | 0.000411014 | 21 |
| 9130204L05Rik | -0.536 | 0.435 | 0.068 | 0.000411706 | 21 |
| Gadd45b       | -0.335 | 0.414 | 0.212 | 0.000439412 | 21 |
| Bace2         | -0.427 | 0.379 | 0.098 | 0.000838498 | 21 |
| Ccdc34        | -0.328 | 0.379 | 0.098 | 0.000843148 | 21 |
| Timp1         | -1.103 | 0.763 | 0.174 | 0.001100023 | 21 |
| Ogfrl1        | -0.286 | 0.379 | 0.091 | 0.001271502 | 21 |
| Hmgb2         | -0.381 | 0.746 | 0.129 | 0.001952895 | 21 |
| Vsig1         | -0.715 | 0.392 | 0.106 | 0.002971669 | 21 |
| Thy1          | -0.340 | 0.371 | 0.091 | 0.002988953 | 21 |
| Serpine1      | -0.286 | 0.685 | 0.159 | 0.00364542  | 21 |
| Svep1         | -0.372 | 0.388 | 0.258 | 0.004019456 | 21 |
| Lgals2        | -1.148 | 0.823 | 0.22  | 0.004276763 | 21 |
| Cd34          | -0.271 | 0.435 | 0.28  | 0.005960262 | 21 |
| Mgll          | 0.367  | 0.685 | 0.098 | 0.008271663 | 21 |
| Sfrp2         | -0.870 | 0.315 | 0.076 | 0.015482572 | 21 |
| Slpi          | 0.548  | 0.151 | 0.008 | 0.026673435 | 21 |
| Ereg          | 0.472  | 0.586 | 0.091 | 0.029181975 | 21 |
| Cxcl1         | -0.475 | 0.759 | 0.205 | 0.039558724 | 21 |
| Snhg18        | -0.436 | 0.509 | 0.318 | 0.043801655 | 21 |
| Bmp2          | 0.361  | 0.401 | 0.106 | 0.054490828 | 21 |
| Thbs1         | -1.118 | 0.806 | 0.227 | 0.061930585 | 21 |
| Muc5ac        | -0.603 | 0.703 | 0.106 | 0.069301901 | 21 |

|           |        |       |       |             |    |
|-----------|--------|-------|-------|-------------|----|
| Emp1      | -0.431 | 0.922 | 0.356 | 0.072138087 | 21 |
| Mmp23     | -0.345 | 0.44  | 0.212 | 0.091009587 | 21 |
| Dcn       | -0.385 | 0.897 | 0.848 | 0.106998768 | 21 |
| S100a6    | -0.468 | 0.983 | 0.902 | 0.10811066  | 21 |
| Dbnidd2   | 0.329  | 0.672 | 0.083 | 0.123042771 | 21 |
| Lbp       | -0.294 | 0.664 | 0.152 | 0.135026947 | 21 |
| Tuba1c    | -0.274 | 0.431 | 0.136 | 0.136174241 | 21 |
| Tff2      | -0.613 | 0.983 | 0.394 | 0.138002623 | 21 |
| Nupr1     | -0.496 | 0.517 | 0.333 | 0.138129863 | 21 |
| Ifrd1     | -0.437 | 0.5   | 0.295 | 0.180303291 | 21 |
| Prss23    | -0.253 | 0.78  | 0.227 | 0.229412892 | 21 |
| Ndr1      | -0.444 | 0.448 | 0.159 | 0.234416645 | 21 |
| ApoE      | -0.346 | 0.487 | 0.311 | 0.261742942 | 21 |
| Tmem100   | 0.269  | 0.349 | 0.061 | 0.266868669 | 21 |
| Ar        | -0.300 | 0.728 | 0.167 | 0.277028207 | 21 |
| Serpina3n | -0.881 | 0.853 | 0.311 | 0.295485954 | 21 |
| Gpm6b     | -0.312 | 0.845 | 0.318 | 0.391487047 | 21 |
| Cyr61     | -0.567 | 0.595 | 0.455 | 0.408195185 | 21 |
| Ckb       | -0.300 | 0.44  | 0.136 | 0.426247245 | 21 |
| Chia1     | 0.324  | 0.819 | 0.311 | 0.513095513 | 21 |
| Nrp1      | -0.393 | 0.366 | 0.083 | 0.518494329 | 21 |
| Aebp1     | -0.524 | 0.547 | 0.371 | 0.552262752 | 21 |
| Loxl2     | -0.482 | 0.522 | 0.371 | 0.683735271 | 21 |
| Col14a1   | -0.615 | 0.875 | 0.379 | 0.905970414 | 21 |
| Serpine2  | -0.404 | 0.414 | 0.136 | 1           | 21 |
| Ucp2      | -0.378 | 0.513 | 0.265 | 1           | 21 |
| Atp5k     | -0.451 | 0.983 | 0.417 | 1           | 21 |
| Col1a1    | -0.753 | 0.815 | 0.674 | 1           | 21 |
| Gsn       | -0.272 | 0.94  | 0.886 | 1           | 21 |
| Gsto1     | -0.683 | 0.72  | 0.167 | 1           | 21 |
| Nid1      | -0.264 | 0.862 | 0.402 | 1           | 21 |
| Ugdh      | -0.279 | 0.763 | 0.227 | 1           | 21 |
| S100a10   | -0.474 | 0.608 | 0.447 | 1           | 21 |
| Prr13     | -0.541 | 0.888 | 0.348 | 1           | 21 |
| Col12a1   | -0.430 | 0.659 | 0.189 | 1           | 21 |
| Cela1     | -0.395 | 0.366 | 0.023 | 1           | 21 |
| Abi3bp    | -0.700 | 0.547 | 0.333 | 1           | 21 |
| Fstl1     | -0.709 | 0.698 | 0.523 | 1           | 21 |
| Gsta4     | -0.607 | 0.763 | 0.227 | 1           | 21 |
| Ccl2      | -0.469 | 0.629 | 0.129 | 1           | 21 |
| Mfap4     | -0.636 | 0.552 | 0.364 | 1           | 21 |
| Col6a2    | -0.447 | 0.815 | 0.689 | 1           | 21 |
| Timp3     | -0.817 | 0.741 | 0.22  | 1           | 21 |
| Sfrp1     | -0.527 | 0.75  | 0.583 | 1           | 21 |
| Mdk       | 0.276  | 0.384 | 0.098 | 1           | 21 |
| Ppp1r15a  | -0.254 | 0.547 | 0.333 | 1           | 21 |
| Foxq1     | -0.604 | 0.457 | 0.114 | 1           | 21 |
| Rbp4      | 0.329  | 0.418 | 0.038 | 1           | 21 |
| Pam       | -0.273 | 0.884 | 0.371 | 1           | 21 |
| Pdpr      | -0.318 | 0.517 | 0.258 | 1           | 21 |



|          |        |       |       |   |    |
|----------|--------|-------|-------|---|----|
| H2-K1    | -0.270 | 0.94  | 0.773 | 1 | 21 |
| Furin    | -0.572 | 0.478 | 0.159 | 1 | 21 |
| Col6a5   | -0.390 | 0.866 | 0.371 | 1 | 21 |
| Col4a1   | -0.444 | 0.849 | 0.341 | 1 | 21 |
| Gatm     | 0.310  | 0.565 | 0.023 | 1 | 21 |
| Tppp3    | -0.628 | 0.737 | 0.212 | 1 | 21 |
| Col3a1   | -0.497 | 0.922 | 0.833 | 1 | 21 |
| Plau     | 0.583  | 0.388 | 0.053 | 1 | 21 |
| Lsp1     | -0.366 | 0.5   | 0.265 | 1 | 21 |
| Art2b    | -0.420 | 0.138 | 0.045 | 1 | 21 |
| Crip1    | -0.464 | 0.983 | 0.773 | 1 | 21 |
| C4b      | -0.334 | 0.991 | 0.492 | 1 | 21 |
| Col15a1  | -0.350 | 0.875 | 0.447 | 1 | 21 |
| Serpinf1 | -0.286 | 0.53  | 0.273 | 1 | 21 |
| Esd      | -0.368 | 0.534 | 0.227 | 1 | 21 |
| Heg1     | -0.423 | 0.733 | 0.235 | 1 | 21 |
| Cxcl12   | -0.258 | 0.892 | 0.492 | 1 | 21 |
| Igf1     | -0.566 | 0.866 | 0.379 | 1 | 21 |
| Igfbp5   | -1.382 | 0.638 | 0.386 | 1 | 21 |
| Mgp      | -0.848 | 0.707 | 0.545 | 1 | 21 |
| Ccl11    | -0.358 | 0.797 | 0.409 | 1 | 21 |
| Mfge8    | -1.378 | 0.565 | 0.273 | 1 | 21 |
| S1pr3    | -0.635 | 0.401 | 0.098 | 1 | 21 |
| Clps     | 0.922  | 0.996 | 0.75  | 1 | 21 |
| Scara5   | -0.603 | 0.655 | 0.227 | 1 | 21 |
| Tnxb     | -0.475 | 0.819 | 0.379 | 1 | 21 |
| Rps29    | 0.321  | 1     | 0.902 | 1 | 21 |
| Col6a3   | -0.670 | 0.871 | 0.402 | 1 | 21 |
| Rps15    | -0.301 | 1     | 0.735 | 1 | 21 |
| Sparc    | -0.598 | 0.953 | 0.758 | 1 | 21 |
| S100a1   | -0.261 | 0.573 | 0.311 | 1 | 21 |
| Dnajb1   | 0.379  | 0.547 | 0.356 | 1 | 21 |
| Anxa2    | -0.623 | 0.759 | 0.492 | 1 | 21 |
| Palld    | -0.346 | 0.53  | 0.197 | 1 | 21 |
| Igfbp3   | 0.974  | 0.448 | 0.076 | 1 | 21 |
| Col6a1   | -0.513 | 0.828 | 0.614 | 1 | 21 |
| Hspa1a   | -0.281 | 0.724 | 0.561 | 1 | 21 |
| Cd200    | -0.427 | 0.483 | 0.136 | 1 | 21 |
| Serpinh1 | -0.383 | 0.884 | 0.614 | 1 | 21 |
| Fbln1    | -0.501 | 0.733 | 0.53  | 1 | 21 |
| Malat1   | 0.281  | 1     | 0.97  | 1 | 21 |
| Prdx1    | -0.391 | 0.905 | 0.606 | 1 | 21 |
| Neat1    | -0.511 | 0.901 | 0.432 | 1 | 21 |
| Tagln2   | -0.469 | 0.754 | 0.5   | 1 | 21 |
| Flna     | -0.384 | 0.599 | 0.303 | 1 | 21 |
| Hspa1b   | -0.714 | 0.983 | 0.492 | 1 | 21 |
| Dpcr1    | -0.316 | 0.595 | 0.068 | 1 | 21 |
| Cdkn1a   | 0.268  | 0.608 | 0.098 | 1 | 21 |
| Gm26532  | 0.410  | 0.526 | 0.242 | 1 | 21 |
| Rdx      | -0.379 | 0.556 | 0.212 | 1 | 21 |

|          |        |       |       |   |    |
|----------|--------|-------|-------|---|----|
| C1ra     | -0.276 | 0.56  | 0.25  | 1 | 21 |
| Bmp4     | -0.304 | 0.53  | 0.28  | 1 | 21 |
| Emid1    | 0.493  | 0.483 | 0.053 | 1 | 21 |
| Col5a2   | -0.309 | 0.707 | 0.492 | 1 | 21 |
| Zeb2     | -0.317 | 0.737 | 0.318 | 1 | 21 |
| Igfbp4   | -0.351 | 0.862 | 0.682 | 1 | 21 |
| Psca     | -0.980 | 0.776 | 0.364 | 1 | 21 |
| Tff1     | -1.500 | 1     | 0.773 | 1 | 21 |
| Htra1    | -0.356 | 0.703 | 0.439 | 1 | 21 |
| Tuba1b   | -0.371 | 0.651 | 0.356 | 1 | 21 |
| Dusp1    | -0.259 | 0.78  | 0.629 | 1 | 21 |
| Nme2     | -0.474 | 0.849 | 0.379 | 1 | 21 |
| Rpl9-ps6 | -0.345 | 0.94  | 0.462 | 1 | 21 |
| Cyp1b1   | -0.650 | 0.556 | 0.144 | 1 | 21 |
| Ier3     | 0.453  | 0.547 | 0.235 | 1 | 21 |
| Cavin1   | -0.283 | 0.784 | 0.371 | 1 | 21 |
| Pcolce   | -0.479 | 0.724 | 0.447 | 1 | 21 |
| Rnase4   | -0.294 | 0.586 | 0.265 | 1 | 21 |
| Fn1      | -0.371 | 0.871 | 0.477 | 1 | 21 |
| Grem2    | -0.256 | 0.496 | 0.083 | 1 | 21 |
| Far1     | -0.368 | 0.547 | 0.159 | 1 | 21 |
| Fndc1    | -0.437 | 0.603 | 0.152 | 1 | 21 |
| Tst      | -0.391 | 0.517 | 0.106 | 1 | 21 |
| Cfh      | -0.352 | 0.75  | 0.356 | 1 | 21 |
| Mt2      | -1.193 | 0.612 | 0.265 | 1 | 21 |
| Cd302    | -0.416 | 0.629 | 0.303 | 1 | 21 |
| Dpt      | -0.268 | 0.884 | 0.705 | 1 | 21 |
| S100a11  | -0.353 | 0.853 | 0.583 | 1 | 21 |
| Barx1    | -0.285 | 0.591 | 0.25  | 1 | 21 |
| Fcgrt    | -0.291 | 0.582 | 0.22  | 1 | 21 |
| Fbn1     | -0.386 | 0.793 | 0.409 | 1 | 21 |
| H2afz    | -0.310 | 0.78  | 0.394 | 1 | 21 |
| Pla2g1b  | 0.911  | 1     | 0.697 | 1 | 21 |
| Htra3    | -0.336 | 0.625 | 0.394 | 1 | 21 |
| Gkn2     | -1.340 | 0.828 | 0.53  | 1 | 21 |
| Rps2     | -0.255 | 0.996 | 0.591 | 1 | 21 |
| Pnliprp2 | 0.401  | 0.159 | 0     | 1 | 21 |
| Axl      | -0.432 | 0.828 | 0.439 | 1 | 21 |
| Gif      | 0.605  | 0.591 | 0.144 | 1 | 21 |
| Ccdc80   | -0.450 | 0.888 | 0.5   | 1 | 21 |
| Saa3     | -1.175 | 0.241 | 0.045 | 1 | 21 |
| Cebpd    | -0.254 | 0.698 | 0.379 | 1 | 21 |
| Ltbp1    | -0.367 | 0.522 | 0.189 | 1 | 21 |
| Tubb4b   | -0.285 | 0.582 | 0.189 | 1 | 21 |
| Emp3     | -0.451 | 0.724 | 0.394 | 1 | 21 |
| Foxf2    | 0.396  | 0.435 | 0.083 | 1 | 21 |
| Lmo4     | -0.481 | 0.616 | 0.227 | 1 | 21 |
| Timp2    | -0.302 | 0.94  | 0.614 | 1 | 21 |
| Selenom  | -0.376 | 0.866 | 0.477 | 1 | 21 |
| Tubb5    | -0.258 | 0.664 | 0.311 | 1 | 21 |

|          |        |       |       |             |    |
|----------|--------|-------|-------|-------------|----|
| H2-T23   | -0.511 | 0.625 | 0.205 | 1           | 21 |
| Fxyd1    | -0.407 | 0.659 | 0.295 | 1           | 21 |
| Plpp3    | -0.258 | 0.789 | 0.439 | 1           | 21 |
| Cyba     | -0.347 | 0.728 | 0.364 | 1           | 21 |
| Mgst3    | -1.247 | 0.621 | 0.22  | 1           | 21 |
| Cst3     | -0.347 | 0.974 | 0.735 | 1           | 21 |
| Rpl17    | -0.277 | 0.991 | 0.652 | 1           | 21 |
| Tmem176b | -0.377 | 0.819 | 0.485 | 1           | 21 |
| Gstm1    | -0.336 | 0.698 | 0.318 | 1           | 21 |
| Pgc      | 0.719  | 0.978 | 0.659 | 1           | 21 |
| AY036118 | -0.540 | 0.832 | 0.492 | 1           | 21 |
| Ly6c1    | -0.297 | 0.634 | 0.25  | 1           | 21 |
| Aldh1a3  | -0.540 | 0.539 | 0.152 | 1           | 21 |
| Procr    | 0.261  | 0.526 | 0.083 | 1           | 21 |
| Gkn1     | -1.670 | 0.888 | 0.561 | 1           | 21 |
| Vim      | -0.256 | 0.914 | 0.568 | 1           | 21 |
| Gsta1    | -0.326 | 0.5   | 0.03  | 1           | 21 |
| Meg3     | -0.770 | 0.716 | 0.356 | 1           | 21 |
| Slbp     | 0.302  | 0.53  | 0.068 | 1           | 21 |
| Hspb1    | 0.256  | 0.573 | 0.152 | 1           | 21 |
| Fabp5    | -0.969 | 0.578 | 0.136 | 1           | 21 |
| Lars2    | 0.559  | 1     | 0.059 | 5.19E-08    | 22 |
| Muc6     | 0.391  | 1     | 0.059 | 5.60E-07    | 22 |
| Pga5     | 0.376  | 0.942 | 0     | 1.70E-06    | 22 |
| Gbp4     | -0.618 | 1     | 0.059 | 1.81E-06    | 22 |
| Gbp7     | -0.720 | 1     | 0.059 | 1.81E-06    | 22 |
| Gkn3     | -2.257 | 1     | 0.059 | 1.81E-06    | 22 |
| Ccl5     | -0.394 | 0.997 | 0.059 | 2.07E-06    | 22 |
| Palld    | -0.499 | 0.994 | 0.059 | 3.07E-06    | 22 |
| Lbh      | -0.573 | 0.99  | 0.059 | 3.98E-06    | 22 |
| Rac2     | -0.545 | 0.974 | 0.059 | 5.13E-06    | 22 |
| Ido1     | -0.457 | 0.961 | 0.059 | 8.53E-06    | 22 |
| Ghrl     | -0.420 | 0.994 | 0.118 | 9.18E-06    | 22 |
| Sst      | -0.618 | 0.945 | 0.059 | 0.000127286 | 22 |
| Ugdh     | -0.639 | 0.945 | 0.059 | 0.000127286 | 22 |
| AY036118 | -0.362 | 1     | 0.118 | 0.00021527  | 22 |
| Nr4a2    | -0.653 | 1     | 0.118 | 0.00021527  | 22 |
| Atp4b    | -0.407 | 1     | 0.118 | 0.000218406 | 22 |
| Atp4a    | -0.344 | 1     | 0.118 | 0.000221586 | 22 |
| Cd177    | -0.429 | 0.997 | 0.118 | 0.000246834 | 22 |
| Tipin    | -0.255 | 0.935 | 0.059 | 0.000255878 | 22 |
| Myc      | -0.393 | 0.997 | 0.118 | 0.000267234 | 22 |
| Cbr3     | -0.619 | 0.997 | 0.118 | 0.000271099 | 22 |
| Hmgcs1   | -0.668 | 0.99  | 0.118 | 0.000381895 | 22 |
| Rtp4     | -0.817 | 0.99  | 0.118 | 0.000421726 | 22 |
| Chil5    | -0.856 | 0.135 | 0.059 | 0.000465426 | 22 |
| Tnni3    | -0.495 | 0.987 | 0.118 | 0.000513778 | 22 |
| Tuba1c   | -0.257 | 0.987 | 0.118 | 0.000521048 | 22 |
| Bex4     | -0.529 | 0.981 | 0.118 | 0.000780883 | 22 |
| Ly6a     | -0.291 | 1     | 0.176 | 0.000987526 | 22 |

|               |        |       |       |             |    |
|---------------|--------|-------|-------|-------------|----|
| Gm26917       | -0.356 | 1     | 0.412 | 0.001213395 | 22 |
| Ptges         | -0.306 | 0.152 | 0.059 | 0.001407624 | 22 |
| Sprr1a        | -0.757 | 0.968 | 0.118 | 0.001600744 | 22 |
| Ceacam10      | -0.258 | 0.81  | 0.059 | 0.001815178 | 22 |
| Mal           | -0.574 | 0.181 | 0.059 | 0.009260697 | 22 |
| Scgb2b7       | 1.622  | 0.171 | 0     | 0.009859592 | 22 |
| Arl6ip1       | -0.558 | 1     | 0.176 | 0.013149568 | 22 |
| Gbp2          | -0.480 | 1     | 0.176 | 0.013818224 | 22 |
| 1810010D01Rik | -0.815 | 1     | 0.176 | 0.013990402 | 22 |
| Chka          | -0.553 | 1     | 0.176 | 0.01416463  | 22 |
| Sprr2a3       | -1.241 | 1     | 0.235 | 0.016629822 | 22 |
| Gm26532       | -0.509 | 0.994 | 0.176 | 0.019025549 | 22 |
| Ddit4         | -0.502 | 0.203 | 0.118 | 0.020218157 | 22 |
| Cyp2s1        | -0.516 | 0.99  | 0.176 | 0.022017994 | 22 |
| Ethe1         | -0.472 | 0.981 | 0.176 | 0.031215656 | 22 |
| Pgd           | -0.832 | 0.971 | 0.176 | 0.061698223 | 22 |
| Gsta4         | 0.285  | 1     | 0.294 | 0.06315646  | 22 |
| Agr2          | 0.325  | 1     | 0.294 | 0.072502998 | 22 |
| Tubb5         | -0.674 | 0.961 | 0.176 | 0.074163882 | 22 |
| Necab1        | -0.502 | 0.258 | 0.176 | 0.152230595 | 22 |
| Gsto1         | -0.563 | 0.942 | 0.176 | 0.153917621 | 22 |
| Aldh3a1       | -0.319 | 0.229 | 0.059 | 0.157294758 | 22 |
| Pcna          | -0.300 | 0.252 | 0.118 | 0.230306171 | 22 |
| Nme2          | -0.350 | 0.919 | 0.176 | 0.267663791 | 22 |
| Cebpb         | -0.976 | 1     | 0.235 | 0.348909569 | 22 |
| F830016B08Rik | -0.650 | 1     | 0.235 | 0.37945288  | 22 |
| Hspa1b        | -0.523 | 1     | 0.235 | 0.38747216  | 22 |
| Aplp1         | -0.843 | 0.929 | 0.176 | 0.425521419 | 22 |
| Malat1        | -0.793 | 1     | 1     | 0.430209592 | 22 |
| Foxq1         | -0.307 | 0.997 | 0.235 | 0.443607704 | 22 |
| Far1          | -0.645 | 1     | 0.235 | 0.448227988 | 22 |
| H2-Ab1        | -1.104 | 1     | 0.882 | 0.467374628 | 22 |
| Gsr           | -0.621 | 0.997 | 0.235 | 0.472014765 | 22 |
| Hist2h2aa1    | 0.299  | 0.845 | 0.118 | 0.523059208 | 22 |
| Gkn1          | -0.265 | 1     | 0.588 | 1           | 22 |
| Ctsl          | -0.262 | 0.294 | 0.059 | 1           | 22 |
| Ifi27         | -0.356 | 1     | 0.294 | 1           | 22 |
| Nr4a1         | -1.286 | 0.865 | 0.176 | 1           | 22 |
| Nqo1          | -0.777 | 0.306 | 0.059 | 1           | 22 |
| Limd2         | -0.582 | 0.806 | 0.118 | 1           | 22 |
| 2210407C18Rik | -0.252 | 0.997 | 0.471 | 1           | 22 |
| Cxcl17        | -0.529 | 1     | 0.294 | 1           | 22 |
| Rps15         | -0.935 | 1     | 0.824 | 1           | 22 |
| Hspa1a        | -0.818 | 1     | 0.294 | 1           | 22 |
| Clic1         | -0.651 | 0.997 | 0.294 | 1           | 22 |
| Igtp          | -0.431 | 1     | 0.294 | 1           | 22 |
| H2-T23        | -0.552 | 1     | 0.294 | 1           | 22 |
| Nupr1         | -2.336 | 0.926 | 0.824 | 1           | 22 |
| Tmsb10        | -0.609 | 1     | 0.412 | 1           | 22 |
| Gstm1         | -0.368 | 0.894 | 0.235 | 1           | 22 |

|          |        |       |       |   |    |
|----------|--------|-------|-------|---|----|
| Iigp1    | -0.384 | 1     | 0.353 | 1 | 22 |
| Timp2    | -0.309 | 0.426 | 0.294 | 1 | 22 |
| Pglyrp1  | -0.836 | 0.368 | 0.176 | 1 | 22 |
| Klf2     | -0.508 | 0.965 | 0.294 | 1 | 22 |
| Gm11808  | -0.984 | 0.471 | 0.353 | 1 | 22 |
| Pnliprp1 | -0.252 | 0.994 | 0.412 | 1 | 22 |
| Gper1    | -0.372 | 0.487 | 0.353 | 1 | 22 |
| Cd74     | -0.854 | 1     | 0.882 | 1 | 22 |
| Gm12888  | 0.460  | 0.335 | 0     | 1 | 22 |
| Pycr1    | -0.284 | 0.381 | 0.118 | 1 | 22 |
| H2-DMA   | -0.721 | 1     | 0.471 | 1 | 22 |
| H2-Eb1   | -0.593 | 1     | 0.529 | 1 | 22 |
| Sox4     | -1.154 | 0.997 | 0.353 | 1 | 22 |
| Ucp2     | -0.864 | 1     | 0.412 | 1 | 22 |
| Ly6e     | -0.562 | 1     | 0.353 | 1 | 22 |
| Cym      | -3.794 | 1     | 0.353 | 1 | 22 |
| Gfpt1    | -0.877 | 1     | 0.412 | 1 | 22 |
| Furin    | 0.452  | 0.997 | 0.824 | 1 | 22 |
| Ube2s    | -0.737 | 0.458 | 0.235 | 1 | 22 |
| Dusp1    | -0.330 | 0.942 | 0.353 | 1 | 22 |
| Rps29    | -0.330 | 1     | 0.882 | 1 | 22 |
| Rpl23a   | -0.394 | 0.877 | 0.412 | 1 | 22 |
| Fxyd6    | -0.391 | 0.581 | 0.412 | 1 | 22 |
| H2-Aa    | -0.706 | 1     | 0.706 | 1 | 22 |
| Cfi      | -0.283 | 1     | 0.412 | 1 | 22 |
| S100a6   | -0.810 | 1     | 0.412 | 1 | 22 |
| Tcim     | -1.111 | 0.974 | 0.412 | 1 | 22 |
| Anpep    | -0.372 | 0.994 | 0.412 | 1 | 22 |
| Actb     | -0.643 | 0.994 | 0.824 | 1 | 22 |
| Kpna2    | -0.303 | 0.439 | 0.118 | 1 | 22 |
| Pigr     | -1.107 | 1     | 0.824 | 1 | 22 |
| Krt8     | -1.116 | 0.997 | 0.588 | 1 | 22 |
| Car2     | -0.359 | 0.906 | 0.353 | 1 | 22 |
| Cckar    | -0.660 | 0.974 | 0.412 | 1 | 22 |
| Csrp1    | -1.154 | 0.548 | 0.294 | 1 | 22 |
| Atf3     | -1.619 | 0.974 | 0.412 | 1 | 22 |
| Mt1      | -0.539 | 0.997 | 0.529 | 1 | 22 |
| Hes1     | -0.844 | 0.99  | 0.471 | 1 | 22 |
| Abhd2    | -0.293 | 0.739 | 0.235 | 1 | 22 |
| ApoE     | -0.759 | 0.419 | 0.059 | 1 | 22 |
| Rpl17    | -0.452 | 0.945 | 0.647 | 1 | 22 |
| Ffar4    | -0.259 | 0.442 | 0.059 | 1 | 22 |
| Crip1    | -0.669 | 0.984 | 0.529 | 1 | 22 |
| H2-K1    | -0.351 | 1     | 0.824 | 1 | 22 |
| Smpd3    | -1.007 | 0.942 | 0.412 | 1 | 22 |
| Tpm1     | -1.184 | 0.729 | 0.235 | 1 | 22 |
| Clu      | -1.011 | 1     | 0.706 | 1 | 22 |
| Prr13    | -0.391 | 0.623 | 0.118 | 1 | 22 |
| Prdx1    | -0.384 | 0.977 | 0.765 | 1 | 22 |
| Pnliprp2 | -0.463 | 1     | 0.647 | 1 | 22 |

|               |        |       |       |          |    |
|---------------|--------|-------|-------|----------|----|
| Psmb8         | -0.759 | 1     | 0.471 | 1        | 22 |
| Zfp36         | -1.178 | 0.997 | 0.471 | 1        | 22 |
| Copz2         | -0.771 | 0.758 | 0.412 | 1        | 22 |
| Tmed6         | -0.633 | 0.955 | 0.588 | 1        | 22 |
| Tagln2        | -0.269 | 0.887 | 0.471 | 1        | 22 |
| Ttr           | -0.391 | 0.823 | 0.529 | 1        | 22 |
| H1fx          | -0.761 | 0.503 | 0.059 | 1        | 22 |
| Sult1c2       | -0.796 | 0.723 | 0.353 | 1        | 22 |
| lfitm3        | -0.557 | 1     | 0.588 | 1        | 22 |
| Cst3          | -0.274 | 0.99  | 0.765 | 1        | 22 |
| Atp5k         | -0.423 | 1     | 0.647 | 1        | 22 |
| Rps2          | -0.306 | 0.994 | 0.706 | 1        | 22 |
| Bpifb1        | -2.062 | 1     | 0.588 | 1        | 22 |
| Anxa10        | -1.046 | 1     | 0.529 | 1        | 22 |
| Cited2        | -0.439 | 0.765 | 0.412 | 1        | 22 |
| Soat1         | -1.039 | 0.674 | 0.294 | 1        | 22 |
| Derl3         | -0.434 | 0.584 | 0.176 | 1        | 22 |
| Neat1         | -1.724 | 0.99  | 0.529 | 1        | 22 |
| Ebf1          | -0.284 | 0.993 | 0.028 | 2.41E-53 | 23 |
| Iigp1         | -0.347 | 1     | 0.067 | 3.38E-44 | 23 |
| Ascl1         | -0.305 | 0.973 | 0.061 | 1.92E-43 | 23 |
| H2-DMb2       | -0.281 | 1     | 0.073 | 6.66E-43 | 23 |
| 2200002D01Rik | -0.289 | 0.939 | 0.056 | 5.60E-42 | 23 |
| Scarb1        | 0.363  | 0.98  | 0.067 | 3.29E-41 | 23 |
| Plac8         | -0.321 | 1     | 0.084 | 1.75E-40 | 23 |
| Dmbt1         | -0.334 | 0.993 | 0.078 | 2.21E-40 | 23 |
| Pga5          | -0.359 | 0.98  | 0.067 | 2.47E-40 | 23 |
| Igkc          | -0.408 | 1     | 0.089 | 3.70E-39 | 23 |
| C4b           | -0.457 | 1     | 0.095 | 5.89E-38 | 23 |
| Gsn           | 0.271  | 0.973 | 0.095 | 4.24E-35 | 23 |
| Gkn3          | -0.460 | 1     | 0.112 | 1.36E-34 | 23 |
| Foxq1         | -0.393 | 1     | 0.117 | 1.60E-33 | 23 |
| Ly6a          | -0.450 | 1     | 0.117 | 2.19E-33 | 23 |
| Atp4a         | -0.564 | 0.993 | 0.123 | 1.60E-31 | 23 |
| Igtp          | -0.372 | 1     | 0.128 | 1.77E-31 | 23 |
| Pglyrp1       | -0.300 | 1     | 0.128 | 2.57E-31 | 23 |
| Ikzf2         | -0.264 | 0.149 | 0.067 | 3.95E-30 | 23 |
| Cd177         | -0.405 | 0.905 | 0.061 | 1.13E-29 | 23 |
| Trp53inp1     | -0.587 | 1     | 0.151 | 1.02E-27 | 23 |
| Gsdma2        | -0.369 | 0.176 | 0.056 | 8.87E-26 | 23 |
| Pigr          | -0.698 | 1     | 0.162 | 2.79E-25 | 23 |
| AW112010      | -0.435 | 1     | 0.162 | 3.20E-25 | 23 |
| Gpx2          | -0.272 | 1     | 0.168 | 4.30E-25 | 23 |
| Mc4r          | 0.308  | 0.973 | 0.179 | 5.58E-24 | 23 |
| Bpifb1        | -0.636 | 1     | 0.173 | 1.79E-23 | 23 |
| Mllt3         | -0.348 | 0.196 | 0.128 | 1.81E-23 | 23 |
| Acsl1         | -0.479 | 0.196 | 0.112 | 2.02E-23 | 23 |
| S100a6        | -0.466 | 1     | 0.179 | 1.12E-22 | 23 |
| Snhg18        | -0.298 | 0.851 | 0.084 | 2.19E-19 | 23 |
| Ctse          | -0.482 | 0.993 | 0.201 | 4.10E-19 | 23 |

|               |        |       |       |             |    |
|---------------|--------|-------|-------|-------------|----|
| Col11a1       | 0.418  | 0.973 | 0.24  | 3.50E-18    | 23 |
| Spink4        | -0.425 | 0.878 | 0.106 | 5.75E-18    | 23 |
| Gsto1         | -0.322 | 0.243 | 0.123 | 1.83E-17    | 23 |
| Muc6          | -0.612 | 1     | 0.212 | 1.86E-17    | 23 |
| Cebpd         | 0.370  | 0.236 | 0.039 | 2.19E-16    | 23 |
| Fabp5         | -0.372 | 0.905 | 0.151 | 5.42E-16    | 23 |
| Ckmt1         | -0.290 | 0.264 | 0.151 | 9.61E-16    | 23 |
| Thbs1         | -0.507 | 0.872 | 0.134 | 4.61E-15    | 23 |
| Serpinb1a     | -0.278 | 0.98  | 0.229 | 6.30E-15    | 23 |
| Serping1      | -0.685 | 1     | 0.235 | 1.28E-14    | 23 |
| Id1           | 0.333  | 0.912 | 0.196 | 1.32E-14    | 23 |
| Creb3l4       | -0.290 | 0.264 | 0.056 | 7.91E-14    | 23 |
| Palld         | -0.271 | 0.291 | 0.128 | 2.11E-12    | 23 |
| H2-Eb1        | -0.669 | 1     | 0.257 | 7.91E-12    | 23 |
| Cym           | -1.032 | 1     | 0.257 | 8.07E-12    | 23 |
| Gria2         | -0.495 | 0.98  | 0.268 | 1.32E-11    | 23 |
| Hspa1b        | -0.460 | 1     | 0.268 | 1.46E-11    | 23 |
| Hbegf         | -0.263 | 0.311 | 0.168 | 9.28E-11    | 23 |
| Hspa1a        | -0.273 | 0.905 | 0.212 | 1.53E-10    | 23 |
| Mrln          | -0.361 | 0.973 | 0.274 | 5.64E-10    | 23 |
| Serpina7      | -0.569 | 0.959 | 0.268 | 1.59E-09    | 23 |
| Ahsg          | -0.348 | 0.899 | 0.218 | 1.64E-09    | 23 |
| S100a11       | -0.403 | 1     | 0.285 | 2.31E-09    | 23 |
| Vgf           | -0.402 | 0.98  | 0.296 | 3.76E-09    | 23 |
| Gm11808       | -0.524 | 0.797 | 0.112 | 9.80E-09    | 23 |
| Gm26532       | 0.594  | 0.311 | 0.078 | 2.90E-08    | 23 |
| Sst           | 1.044  | 0.75  | 0.067 | 3.32E-08    | 23 |
| Cckar         | 0.392  | 0.311 | 0.061 | 3.39E-08    | 23 |
| Car2          | -0.592 | 0.946 | 0.263 | 6.06E-08    | 23 |
| Nr4a2         | -0.263 | 0.338 | 0.128 | 9.73E-08    | 23 |
| 2210407C18Rik | -0.630 | 1     | 0.33  | 1.23E-07    | 23 |
| Smpd3         | -0.393 | 0.993 | 0.318 | 1.36E-07    | 23 |
| Mgst3         | -0.571 | 0.392 | 0.246 | 4.83E-07    | 23 |
| Ctxn1         | 0.298  | 0.324 | 0.095 | 1.11E-06    | 23 |
| Psmb8         | -0.307 | 1     | 0.341 | 6.00E-06    | 23 |
| Cyba          | -0.269 | 0.385 | 0.168 | 4.41E-05    | 23 |
| Sprr2a3       | -1.131 | 1     | 0.33  | 5.08E-05    | 23 |
| Col8a1        | -0.388 | 0.966 | 0.358 | 0.000213683 | 23 |
| Tff3          | 0.274  | 0.365 | 0.112 | 0.000220231 | 23 |
| H2-Aa         | -0.902 | 1     | 0.341 | 0.000348303 | 23 |
| Gadd45g       | 0.480  | 0.764 | 0.196 | 0.001072495 | 23 |
| Fst           | -0.827 | 0.98  | 0.358 | 0.001550365 | 23 |
| Lars2         | -0.350 | 0.953 | 0.363 | 0.003109098 | 23 |
| Pappa2        | 0.371  | 0.98  | 0.659 | 0.004866814 | 23 |
| H2-T23        | -0.443 | 1     | 0.38  | 0.005388714 | 23 |
| Gfpt1         | -0.290 | 1     | 0.402 | 0.012010727 | 23 |
| Ifi27         | -0.372 | 0.993 | 0.419 | 0.046650992 | 23 |
| Nkx6-2        | 0.282  | 0.959 | 0.581 | 0.055220529 | 23 |
| Anxa10        | -0.303 | 0.993 | 0.408 | 0.060602718 | 23 |
| Nap1l5        | 0.295  | 0.412 | 0.162 | 0.078686188 | 23 |

|               |        |       |       |             |    |
|---------------|--------|-------|-------|-------------|----|
| Smim24        | 0.259  | 0.392 | 0.045 | 0.083687127 | 23 |
| Lgals9        | -0.358 | 0.851 | 0.285 | 0.112361877 | 23 |
| Ptprn         | -0.410 | 0.973 | 0.408 | 0.40126918  | 23 |
| Esd           | -0.267 | 0.48  | 0.212 | 0.417202684 | 23 |
| Car8          | 0.334  | 0.412 | 0.061 | 0.584819466 | 23 |
| C2cd4b        | -0.517 | 0.797 | 0.257 | 1           | 23 |
| H2-Ab1        | -0.855 | 1     | 0.402 | 1           | 23 |
| Wars          | -0.296 | 0.527 | 0.279 | 1           | 23 |
| Ptf1a         | 0.263  | 0.919 | 0.587 | 1           | 23 |
| Prr13         | -0.259 | 0.574 | 0.369 | 1           | 23 |
| Dpcr1         | -0.354 | 0.432 | 0.05  | 1           | 23 |
| Tff2          | -0.490 | 1     | 0.475 | 1           | 23 |
| Gsta4         | -0.455 | 0.689 | 0.151 | 1           | 23 |
| AY036118      | -0.396 | 1     | 0.581 | 1           | 23 |
| Tmem54        | -0.282 | 0.574 | 0.352 | 1           | 23 |
| Lgals2        | -0.355 | 0.514 | 0.218 | 1           | 23 |
| Krt19         | -0.262 | 0.52  | 0.235 | 1           | 23 |
| Reg1          | -0.651 | 0.514 | 0.218 | 1           | 23 |
| Rpl23a        | -0.375 | 0.993 | 0.48  | 1           | 23 |
| Clps          | -0.478 | 1     | 1     | 1           | 23 |
| Rps2          | -0.328 | 0.993 | 0.52  | 1           | 23 |
| Mt2           | -0.318 | 0.486 | 0.14  | 1           | 23 |
| lfitm3        | -0.446 | 1     | 0.508 | 1           | 23 |
| Gkn2          | -0.807 | 0.838 | 0.385 | 1           | 23 |
| Chia1         | -0.401 | 0.851 | 0.419 | 1           | 23 |
| Mboat4        | -0.375 | 0.804 | 0.358 | 1           | 23 |
| Meg3          | -0.485 | 0.973 | 0.525 | 1           | 23 |
| Gif           | -1.000 | 0.703 | 0.229 | 1           | 23 |
| Hmgn2         | -0.257 | 0.757 | 0.291 | 1           | 23 |
| Aplp1         | -0.412 | 0.878 | 0.637 | 1           | 23 |
| Agr2          | -0.997 | 0.554 | 0.179 | 1           | 23 |
| Resp18        | -0.467 | 0.757 | 0.52  | 1           | 23 |
| Tmed3         | -0.534 | 0.689 | 0.369 | 1           | 23 |
| Hepacam2      | -0.300 | 0.574 | 0.246 | 1           | 23 |
| Cst3          | -0.281 | 0.926 | 0.682 | 1           | 23 |
| 1810010D01Rik | -0.436 | 0.547 | 0.156 | 1           | 23 |
| Gkn1          | -0.940 | 0.865 | 0.464 | 1           | 23 |
| Prdx1         | -0.265 | 0.986 | 0.575 | 1           | 23 |
| Tmem176b      | -0.322 | 0.716 | 0.391 | 1           | 23 |
| Tubb5         | 0.293  | 0.628 | 0.235 | 1           | 23 |
| Bex2          | -0.253 | 0.892 | 0.503 | 1           | 23 |
| Rps15         | -0.437 | 1     | 0.642 | 1           | 23 |
| Kcnk3         | -0.328 | 0.689 | 0.385 | 1           | 23 |
| Cd74          | -0.856 | 1     | 0.659 | 1           | 23 |
| Rbpjl         | -0.252 | 0.709 | 0.441 | 1           | 23 |
| Nme2          | -0.380 | 0.811 | 0.397 | 1           | 23 |
| Rpl9-ps6      | -0.291 | 0.926 | 0.497 | 1           | 23 |
| Ghrl          | -0.353 | 0.986 | 0.749 | 1           | 23 |
| Cel           | -0.410 | 0.899 | 0.693 | 1           | 23 |
| Nupr1         | -0.731 | 0.919 | 0.559 | 1           | 23 |



|               |        |       |       |             |    |
|---------------|--------|-------|-------|-------------|----|
| Pgc           | -0.306 | 1     | 0.799 | 1           | 23 |
| Id3           | 0.300  | 0.649 | 0.352 | 1           | 23 |
| Tmsb10        | -0.293 | 0.885 | 0.564 | 1           | 23 |
| Rpl17         | -0.329 | 0.885 | 0.559 | 1           | 23 |
| Anpep         | -0.527 | 0.892 | 0.559 | 1           | 23 |
| Ctsl          | -0.857 | 0.986 | 0.575 | 1           | 23 |
| Hspb1         | -0.437 | 0.831 | 0.475 | 1           | 23 |
| Crip1         | -0.311 | 0.993 | 0.704 | 1           | 23 |
| AY036118      | 0.632  | 1     | 0.052 | 1.51E-35    | 24 |
| Ifit1b1       | -0.273 | 1     | 0.052 | 1.04E-34    | 24 |
| Cym           | -0.791 | 1     | 0.062 | 3.20E-32    | 24 |
| Gkn3          | -0.748 | 1     | 0.072 | 6.41E-30    | 24 |
| 8430408G22Rik | -0.275 | 1     | 0.088 | 1.03E-26    | 24 |
| Fabp4         | -0.385 | 0.878 | 0.046 | 1.18E-25    | 24 |
| Muc6          | -0.745 | 0.98  | 0.082 | 3.65E-25    | 24 |
| Chil4         | -2.026 | 1     | 0.108 | 6.01E-23    | 24 |
| Cldn4         | -0.336 | 1     | 0.124 | 2.21E-20    | 24 |
| Pga5          | -0.276 | 0.163 | 0.082 | 6.56E-19    | 24 |
| Krt13         | -0.552 | 1     | 0.155 | 5.57E-16    | 24 |
| Bpifb1        | -1.203 | 1     | 0.165 | 1.10E-14    | 24 |
| Pmm1          | -0.282 | 1     | 0.165 | 1.18E-14    | 24 |
| Edn1          | -0.330 | 1     | 0.201 | 6.39E-11    | 24 |
| H2-Ab1        | -0.269 | 1     | 0.206 | 8.10E-11    | 24 |
| Plet1         | -0.491 | 0.959 | 0.196 | 9.47E-09    | 24 |
| 4930539E08Rik | -0.340 | 1     | 0.242 | 2.82E-07    | 24 |
| Rpl9-ps6      | 0.425  | 0.816 | 0.144 | 1.35E-05    | 24 |
| St3gal4       | -0.344 | 1     | 0.263 | 1.69E-05    | 24 |
| Anxa1         | -0.275 | 1     | 0.278 | 5.70E-05    | 24 |
| Clca1         | -0.927 | 1     | 0.938 | 5.89E-05    | 24 |
| Myo15b        | -0.406 | 1     | 0.284 | 0.000208151 | 24 |
| Cd74          | -0.810 | 1     | 0.325 | 0.00063273  | 24 |
| Duoxa2        | -1.055 | 1     | 0.299 | 0.00269331  | 24 |
| Npy           | 0.633  | 0.347 | 0.026 | 0.004267725 | 24 |
| Mt2           | -0.397 | 0.796 | 0.17  | 0.02791231  | 24 |
| Idi1          | -0.294 | 0.449 | 0.407 | 0.031999244 | 24 |
| Lgals2        | 0.425  | 0.878 | 0.474 | 0.162043744 | 24 |
| Rnf186        | -0.254 | 0.429 | 0.227 | 0.287975305 | 24 |
| Pigr          | -0.936 | 1     | 0.351 | 0.311140243 | 24 |
| Plaur         | -0.265 | 1     | 0.376 | 0.940300378 | 24 |
| Nupr1         | -1.639 | 0.878 | 0.284 | 1           | 24 |
| Malat1        | -0.497 | 1     | 1     | 1           | 24 |
| Tff2          | -0.562 | 1     | 0.902 | 1           | 24 |
| Ly6g6c        | -0.274 | 1     | 0.448 | 1           | 24 |
| Gm42418       | 0.977  | 1     | 0.536 | 1           | 24 |
| 2200002D01Rik | -0.259 | 1     | 0.933 | 1           | 24 |
| Pglyrp1       | -0.271 | 1     | 0.387 | 1           | 24 |
| Clu           | -1.163 | 1     | 0.851 | 1           | 24 |
| Fdps          | -0.267 | 0.612 | 0.495 | 1           | 24 |
| Tmem189       | -0.340 | 0.857 | 0.814 | 1           | 24 |
| Spink4        | -0.369 | 1     | 0.881 | 1           | 24 |

|            |        |       |       |          |    |
|------------|--------|-------|-------|----------|----|
| Gsr        | -0.356 | 0.959 | 0.789 | 1        | 24 |
| H2-K1      | -0.297 | 1     | 0.5   | 1        | 24 |
| Duox2      | -0.515 | 1     | 0.469 | 1        | 24 |
| Cybrd1     | -0.330 | 1     | 0.546 | 1        | 24 |
| Rbp2       | 0.375  | 1     | 0.861 | 1        | 24 |
| Rps2       | -0.407 | 0.918 | 0.799 | 1        | 24 |
| Ier3       | -0.314 | 1     | 0.459 | 1        | 24 |
| Rflnb      | -0.272 | 0.714 | 0.51  | 1        | 24 |
| Dusp5      | -0.282 | 1     | 0.479 | 1        | 24 |
| Suox       | -0.279 | 1     | 0.732 | 1        | 24 |
| Lgals4     | 0.407  | 1     | 0.928 | 1        | 24 |
| Nqo1       | -0.384 | 0.98  | 0.758 | 1        | 24 |
| Clps       | -0.316 | 1     | 0.753 | 1        | 24 |
| Rpl17      | -0.275 | 0.959 | 0.809 | 1        | 24 |
| Esd        | -0.366 | 0.878 | 0.655 | 1        | 24 |
| Rps15      | -0.257 | 0.98  | 0.83  | 1        | 24 |
| Gm26532    | -0.320 | 0.612 | 0.356 | 1        | 24 |
| Psap1      | -0.274 | 1     | 0.866 | 1        | 24 |
| Crip1      | 0.258  | 1     | 0.969 | 1        | 24 |
| Emp1       | -0.274 | 1     | 0.521 | 1        | 24 |
| Dnajb1     | -0.455 | 0.612 | 0.34  | 1        | 24 |
| Serpinb1a  | -0.278 | 1     | 0.505 | 1        | 24 |
| Dusp1      | -0.332 | 1     | 0.778 | 1        | 24 |
| Fcgbp      | -0.661 | 1     | 0.758 | 1        | 24 |
| Hist1h1c   | -0.357 | 1     | 0.727 | 1        | 24 |
| Gadd45g    | -0.308 | 0.98  | 0.531 | 1        | 24 |
| Tkt        | -0.269 | 0.959 | 0.686 | 1        | 24 |
| Insig1     | -0.401 | 1     | 0.665 | 1        | 24 |
| Wfdc2      | -0.540 | 0.959 | 0.5   | 1        | 24 |
| Ly6d       | -0.580 | 1     | 0.613 | 1        | 24 |
| AW112010   | -0.634 | 1     | 0.716 | 1        | 24 |
| Gstp1      | 0.299  | 0.571 | 0.124 | 1        | 24 |
| Arl14      | -0.381 | 0.98  | 0.619 | 1        | 24 |
| Mt1        | -0.619 | 0.898 | 0.686 | 1        | 24 |
| Fhl2       | -0.258 | 1     | 0.572 | 1        | 24 |
| Sfn        | 0.348  | 1     | 0.866 | 1        | 24 |
| Tubb4b     | -0.268 | 0.939 | 0.613 | 1        | 24 |
| Actb       | 0.269  | 1     | 0.99  | 1        | 24 |
| Ces2c      | -0.294 | 1     | 0.866 | 1        | 24 |
| Dmbt1      | -0.540 | 1     | 0.531 | 1        | 24 |
| Ndr1       | -0.408 | 1     | 0.701 | 1        | 24 |
| Igkv15-103 | -0.290 | 0.955 | 0.037 | 1.05E-26 | 25 |
| Tnfrsf10b  | 0.262  | 0.955 | 0.037 | 6.50E-26 | 25 |
| Cxcl1      | -0.423 | 0.961 | 0.037 | 7.19E-25 | 25 |
| Gm37800    | -0.256 | 0.942 | 0.049 | 1.87E-24 | 25 |
| Pigr       | -0.265 | 1     | 0.074 | 2.19E-24 | 25 |
| Lrrc15     | 0.304  | 0.87  | 0.025 | 6.87E-24 | 25 |
| Ets1       | -0.329 | 0.968 | 0.049 | 9.81E-24 | 25 |
| C1qb       | -0.316 | 0.896 | 0.037 | 1.21E-23 | 25 |
| Muc6       | -0.432 | 1     | 0.086 | 6.81E-23 | 25 |

|               |        |       |       |          |    |
|---------------|--------|-------|-------|----------|----|
| Gkn3          | -0.472 | 1     | 0.086 | 6.96E-23 | 25 |
| Igkc          | -0.608 | 1     | 0.086 | 7.27E-23 | 25 |
| Iigp1         | -0.625 | 1     | 0.086 | 7.27E-23 | 25 |
| Spink4        | -0.269 | 1     | 0.099 | 2.07E-21 | 25 |
| H2-Eb1        | -0.706 | 1     | 0.099 | 2.16E-21 | 25 |
| Irgm1         | -0.255 | 0.961 | 0.074 | 2.77E-20 | 25 |
| Nrp1          | -0.343 | 0.961 | 0.074 | 3.20E-20 | 25 |
| Ndufa4l2      | 0.291  | 0.974 | 0.099 | 1.53E-19 | 25 |
| Adamts4       | -0.382 | 0.974 | 0.111 | 6.94E-19 | 25 |
| Lypd8         | -0.311 | 0.974 | 0.099 | 8.72E-19 | 25 |
| C4b           | -0.451 | 1     | 0.123 | 1.37E-18 | 25 |
| H2-Ab1        | -0.495 | 1     | 0.123 | 1.37E-18 | 25 |
| Slit3         | -0.332 | 0.13  | 0.037 | 1.41E-18 | 25 |
| Tfpi          | -0.262 | 0.13  | 0.037 | 1.09E-17 | 25 |
| Angptl2       | 0.330  | 0.123 | 0     | 1.30E-17 | 25 |
| H2-Aa         | -0.670 | 1     | 0.136 | 2.89E-17 | 25 |
| Ptgs2         | -0.552 | 0.987 | 0.136 | 3.16E-17 | 25 |
| Car2          | -0.376 | 0.981 | 0.123 | 5.08E-17 | 25 |
| Gbp4          | -0.359 | 0.87  | 0.049 | 2.22E-16 | 25 |
| Cym           | -2.444 | 1     | 0.16  | 7.96E-15 | 25 |
| Tnfaip3       | -0.289 | 0.708 | 0.049 | 1.21E-13 | 25 |
| Gbp2b         | -0.253 | 0.903 | 0.086 | 2.00E-13 | 25 |
| Atp2a3        | -0.592 | 0.981 | 0.16  | 2.76E-13 | 25 |
| Abhd2         | -0.286 | 0.942 | 0.136 | 1.32E-12 | 25 |
| Gm11361       | -0.284 | 1     | 0.185 | 1.53E-12 | 25 |
| Mt2           | -0.323 | 0.981 | 0.173 | 1.93E-12 | 25 |
| Jchain        | -0.521 | 0.695 | 0.074 | 2.18E-11 | 25 |
| Tnfaip2       | -0.391 | 0.974 | 0.185 | 2.42E-11 | 25 |
| Hspa1b        | -0.454 | 0.994 | 0.21  | 6.89E-11 | 25 |
| Cyp4b1        | 0.376  | 0.786 | 0.012 | 8.91E-11 | 25 |
| Icam1         | -0.333 | 0.799 | 0.049 | 1.29E-10 | 25 |
| S1pr3         | -0.351 | 0.916 | 0.16  | 1.76E-09 | 25 |
| Nr4a3         | -0.487 | 1     | 0.235 | 8.09E-09 | 25 |
| Flnc          | -0.295 | 0.909 | 0.173 | 1.35E-08 | 25 |
| Dmp1          | -0.474 | 0.519 | 0.037 | 1.72E-08 | 25 |
| Krt8          | -0.415 | 1     | 0.247 | 4.92E-08 | 25 |
| Aoc3          | -0.306 | 0.305 | 0.272 | 1.39E-07 | 25 |
| Ube2s         | -0.499 | 0.922 | 0.185 | 1.84E-07 | 25 |
| Ldhb          | -0.297 | 0.273 | 0.086 | 2.93E-07 | 25 |
| Gif           | -0.594 | 0.292 | 0.16  | 3.50E-07 | 25 |
| Lims2         | -0.339 | 0.305 | 0.21  | 4.02E-07 | 25 |
| Rgs10         | 0.451  | 0.838 | 0.148 | 1.88E-06 | 25 |
| Ccl11         | 0.438  | 0.253 | 0.012 | 2.15E-06 | 25 |
| Lum           | 0.274  | 0.286 | 0.086 | 3.92E-06 | 25 |
| Krt19         | -0.270 | 0.831 | 0.123 | 7.75E-06 | 25 |
| Nrip2         | -0.272 | 0.857 | 0.16  | 7.82E-06 | 25 |
| Tmed3         | -0.310 | 0.292 | 0.074 | 8.64E-06 | 25 |
| Rgs4          | -0.330 | 0.968 | 0.259 | 1.18E-05 | 25 |
| 8430408G22Rik | -0.306 | 0.747 | 0.037 | 1.41E-05 | 25 |
| Vtn           | 0.447  | 0.13  | 0     | 2.72E-05 | 25 |

|          |        |       |       |             |    |
|----------|--------|-------|-------|-------------|----|
| Fgl2     | -0.367 | 0.779 | 0.074 | 2.82E-05    | 25 |
| Actc1    | 0.296  | 0.286 | 0.074 | 2.91E-05    | 25 |
| Nrarp    | 0.433  | 0.695 | 0.16  | 0.000103843 | 25 |
| Dlc1     | -0.368 | 0.799 | 0.123 | 0.00012378  | 25 |
| Gbp2     | -0.265 | 0.812 | 0.123 | 0.000128775 | 25 |
| Rcn3     | -0.367 | 0.351 | 0.185 | 0.000185784 | 25 |
| Gm13861  | -0.408 | 0.844 | 0.173 | 0.000200528 | 25 |
| Crlf1    | -0.298 | 0.734 | 0.037 | 0.00023201  | 25 |
| Phlda1   | 0.307  | 0.805 | 0.136 | 0.000246793 | 25 |
| Cited2   | 0.278  | 0.766 | 0.086 | 0.000367025 | 25 |
| Jag1     | -0.563 | 0.981 | 0.296 | 0.000396934 | 25 |
| Ramp1    | -0.426 | 0.396 | 0.284 | 0.000784869 | 25 |
| Eln      | -0.682 | 0.468 | 0.395 | 0.00105119  | 25 |
| Map3k7cl | -0.398 | 0.974 | 0.321 | 0.00127753  | 25 |
| Notch3   | -0.458 | 0.987 | 0.321 | 0.001415693 | 25 |
| Tcim     | -0.354 | 0.351 | 0.136 | 0.001462954 | 25 |
| Bst2     | -0.350 | 0.383 | 0.198 | 0.002884609 | 25 |
| Hhip     | 0.275  | 0.734 | 0.16  | 0.003271673 | 25 |
| P2rx1    | -0.627 | 0.825 | 0.173 | 0.003790259 | 25 |
| Cd74     | -0.589 | 1     | 0.321 | 0.004825832 | 25 |
| Atp1b2   | -0.327 | 0.357 | 0.136 | 0.00573366  | 25 |
| Sprr2a3  | -0.833 | 1     | 0.321 | 0.006124958 | 25 |
| Mdk      | 0.290  | 0.662 | 0.049 | 0.006773194 | 25 |
| Oxct1    | -0.481 | 0.39  | 0.198 | 0.006985469 | 25 |
| Ddit4    | -0.388 | 0.351 | 0.099 | 0.007036996 | 25 |
| Msn      | -0.427 | 0.455 | 0.333 | 0.008960043 | 25 |
| Wars     | -0.297 | 0.351 | 0.086 | 0.009144174 | 25 |
| Hspb7    | -0.396 | 0.409 | 0.247 | 0.012319013 | 25 |
| Clu      | -0.401 | 0.364 | 0.111 | 0.013340166 | 25 |
| Fn1      | -0.315 | 0.779 | 0.136 | 0.014776206 | 25 |
| Fabp5    | -0.357 | 0.747 | 0.099 | 0.019125965 | 25 |
| Ccdc34   | -0.345 | 0.357 | 0.086 | 0.019420733 | 25 |
| Sod3     | -0.381 | 0.403 | 0.198 | 0.021577627 | 25 |
| Tpm1     | -0.358 | 1     | 0.938 | 0.025301344 | 25 |
| Mgp      | -0.933 | 0.89  | 0.259 | 0.026492438 | 25 |
| Tubb5    | -0.409 | 0.435 | 0.247 | 0.045164497 | 25 |
| Pln      | -0.447 | 0.981 | 0.358 | 0.045178579 | 25 |
| Grem2    | -0.467 | 0.422 | 0.235 | 0.045606733 | 25 |
| Col4a5   | -0.326 | 0.773 | 0.148 | 0.05318579  | 25 |
| Tff2     | -0.368 | 1     | 0.358 | 0.054087699 | 25 |
| Ebf1     | -0.349 | 0.994 | 0.358 | 0.055065488 | 25 |
| Copz2    | -0.429 | 0.396 | 0.148 | 0.075203383 | 25 |
| Syt13    | 0.276  | 0.61  | 0.025 | 0.091029224 | 25 |
| Lmod1    | -0.535 | 0.565 | 0.457 | 0.131306513 | 25 |
| Crispld2 | -0.574 | 0.844 | 0.235 | 0.139872025 | 25 |
| S100a4   | -0.283 | 0.357 | 0.049 | 0.152866482 | 25 |
| Pde4b    | -0.264 | 0.435 | 0.235 | 0.16019544  | 25 |
| Sncg     | -0.567 | 0.929 | 0.321 | 0.174720435 | 25 |
| Heyl     | -0.301 | 0.695 | 0.074 | 0.241381118 | 25 |
| Fabp3    | 0.310  | 0.37  | 0.049 | 0.333689679 | 25 |

|          |        |       |       |             |    |
|----------|--------|-------|-------|-------------|----|
| Plpp3    | -0.281 | 0.805 | 0.21  | 0.356627665 | 25 |
| ApoE     | -0.766 | 0.377 | 0.062 | 0.369028394 | 25 |
| Sfrp1    | -0.439 | 0.416 | 0.16  | 0.403514644 | 25 |
| Neat1    | -0.637 | 0.89  | 0.296 | 0.671216467 | 25 |
| Sparcl1  | -0.627 | 0.812 | 0.741 | 0.933569734 | 25 |
| Pdgfrb   | -0.292 | 0.76  | 0.173 | 1           | 25 |
| Igfbp4   | -0.554 | 0.442 | 0.185 | 1           | 25 |
| Epas1    | -0.345 | 0.994 | 0.407 | 1           | 25 |
| AW112010 | -0.353 | 0.74  | 0.148 | 1           | 25 |
| Parm1    | -0.486 | 0.903 | 0.321 | 1           | 25 |
| Col18a1  | -0.799 | 0.513 | 0.284 | 1           | 25 |
| Mfge8    | -0.576 | 0.623 | 0.469 | 1           | 25 |
| Smtn     | -0.722 | 0.643 | 0.469 | 1           | 25 |
| Cav1     | -0.437 | 0.597 | 0.432 | 1           | 25 |
| Bcam     | -0.481 | 0.968 | 0.383 | 1           | 25 |
| Rps29    | 0.602  | 1     | 0.963 | 1           | 25 |
| Tpm2     | -0.381 | 0.955 | 0.889 | 1           | 25 |
| Socs3    | -0.427 | 0.545 | 0.383 | 1           | 25 |
| Pim1     | -0.318 | 0.714 | 0.136 | 1           | 25 |
| Tgm2     | -0.613 | 0.61  | 0.395 | 1           | 25 |
| Rpl23a   | 0.623  | 1     | 0.617 | 1           | 25 |
| Col4a2   | -0.533 | 0.649 | 0.457 | 1           | 25 |
| Vim      | -0.762 | 0.799 | 0.58  | 1           | 25 |
| Serpine1 | 0.252  | 0.786 | 0.259 | 1           | 25 |
| Ehd2     | -0.335 | 0.526 | 0.296 | 1           | 25 |
| Tesc     | -0.292 | 0.474 | 0.198 | 1           | 25 |
| Acta2    | -0.255 | 1     | 0.975 | 1           | 25 |
| Des      | -0.447 | 0.831 | 0.716 | 1           | 25 |
| Ccdc3    | -0.503 | 0.5   | 0.235 | 1           | 25 |
| Lars2    | -0.520 | 0.5   | 0.235 | 1           | 25 |
| Prss23   | -0.510 | 0.877 | 0.333 | 1           | 25 |
| Rasl11a  | -0.705 | 0.532 | 0.272 | 1           | 25 |
| Lhfp     | -0.554 | 0.584 | 0.333 | 1           | 25 |
| mt-Nd3   | -0.363 | 1     | 0.444 | 1           | 25 |
| Cpe      | -0.393 | 0.805 | 0.284 | 1           | 25 |
| S100a13  | -0.402 | 0.474 | 0.148 | 1           | 25 |
| Igfbp3   | 0.387  | 0.448 | 0.111 | 1           | 25 |
| Dnajb1   | 0.428  | 0.455 | 0.111 | 1           | 25 |
| Map1b    | -0.418 | 0.591 | 0.333 | 1           | 25 |
| Cst3     | -0.728 | 0.844 | 0.605 | 1           | 25 |
| Palld    | -0.404 | 0.831 | 0.617 | 1           | 25 |
| Myh11    | -0.324 | 0.974 | 0.864 | 1           | 25 |
| Neur13   | -0.423 | 0.123 | 0.012 | 1           | 25 |
| Emp3     | -0.413 | 0.565 | 0.284 | 1           | 25 |
| Speg     | -0.325 | 0.513 | 0.21  | 1           | 25 |
| Lgals3   | -0.399 | 0.682 | 0.148 | 1           | 25 |
| Dusp1    | -0.276 | 0.961 | 0.84  | 1           | 25 |
| Tm4sf1   | -0.579 | 0.903 | 0.395 | 1           | 25 |
| Rrad     | -0.300 | 0.604 | 0.383 | 1           | 25 |
| Ltbp4    | -0.366 | 0.545 | 0.284 | 1           | 25 |

|          |        |       |       |   |    |
|----------|--------|-------|-------|---|----|
| Zeb2     | -0.345 | 0.981 | 0.481 | 1 | 25 |
| Clps     | -1.121 | 1     | 0.679 | 1 | 25 |
| Enpp2    | -0.326 | 0.714 | 0.222 | 1 | 25 |
| Pdlim3   | -0.326 | 0.838 | 0.617 | 1 | 25 |
| Grem1    | -0.578 | 0.669 | 0.148 | 1 | 25 |
| Gsn      | -0.382 | 0.883 | 0.42  | 1 | 25 |
| Mt1      | -0.332 | 0.981 | 0.543 | 1 | 25 |
| Tinag1   | -0.508 | 0.669 | 0.407 | 1 | 25 |
| Rbpms2   | -0.294 | 0.617 | 0.333 | 1 | 25 |
| Igfbp7   | -0.414 | 0.974 | 0.741 | 1 | 25 |
| Gm42418  | -0.972 | 0.818 | 0.58  | 1 | 25 |
| Zfp36    | -0.305 | 0.903 | 0.84  | 1 | 25 |
| Atf3     | -0.377 | 0.877 | 0.704 | 1 | 25 |
| Ccrl2    | 0.377  | 0.591 | 0.062 | 1 | 25 |
| Mcam     | -0.413 | 0.994 | 0.506 | 1 | 25 |
| Malat1   | 0.985  | 1     | 0.975 | 1 | 25 |
| Tgfb3    | -0.264 | 0.494 | 0.111 | 1 | 25 |
| Nme2     | -0.564 | 0.714 | 0.222 | 1 | 25 |
| Tuba1b   | -0.276 | 0.799 | 0.346 | 1 | 25 |
| Col4a1   | -0.526 | 0.864 | 0.383 | 1 | 25 |
| Ckmt1    | -0.332 | 0.468 | 0.049 | 1 | 25 |
| Gucy1a1  | -0.330 | 0.766 | 0.296 | 1 | 25 |
| Hotairm1 | -0.387 | 0.747 | 0.284 | 1 | 25 |
| Bpifb1   | -0.727 | 0.597 | 0.074 | 1 | 25 |
| Igfbp5   | -0.742 | 0.766 | 0.506 | 1 | 25 |
| Rpl9-ps6 | -0.631 | 0.779 | 0.296 | 1 | 25 |
| Cyr61    | -0.353 | 0.682 | 0.444 | 1 | 25 |
| Tgfb1i1  | -0.410 | 0.766 | 0.284 | 1 | 25 |
| Ppp1r14a | -0.866 | 0.753 | 0.432 | 1 | 25 |
| Gem      | -0.251 | 0.545 | 0.21  | 1 | 25 |
| Lbh      | -0.442 | 0.974 | 0.494 | 1 | 25 |
| Ckb      | -0.393 | 0.916 | 0.63  | 1 | 25 |
| Chia1    | -0.350 | 0.656 | 0.173 | 1 | 25 |
| AY036118 | -0.692 | 0.623 | 0.296 | 1 | 25 |
| Rpl17    | 0.289  | 1     | 0.679 | 1 | 25 |
| Dmpk     | -0.352 | 0.695 | 0.395 | 1 | 25 |
| Fxyd5    | -0.280 | 0.487 | 0.062 | 1 | 25 |
| Psca     | -0.466 | 0.604 | 0.259 | 1 | 25 |
| Kcnmb1   | -0.386 | 0.539 | 0.16  | 1 | 25 |
| Hes1     | -0.452 | 0.961 | 0.506 | 1 | 25 |
| Cavin3   | -0.531 | 0.948 | 0.568 | 1 | 25 |
| Bgn      | -0.294 | 0.818 | 0.531 | 1 | 25 |
| Fhl1     | -0.265 | 0.805 | 0.642 | 1 | 25 |
| Pcp4l1   | -0.536 | 0.721 | 0.395 | 1 | 25 |
| Id2      | -0.330 | 0.682 | 0.235 | 1 | 25 |
| Ctgf     | -0.281 | 0.591 | 0.247 | 1 | 25 |
| Crip2    | -0.376 | 0.903 | 0.568 | 1 | 25 |
| Selenom  | -0.495 | 0.877 | 0.543 | 1 | 25 |
| Gsta4    | -0.429 | 0.532 | 0.123 | 1 | 25 |
| Mgll     | -0.275 | 0.578 | 0.198 | 1 | 25 |

|               |        |       |       |          |    |
|---------------|--------|-------|-------|----------|----|
| Rps2          | 0.300  | 1     | 0.691 | 1        | 25 |
| Ghrl          | -0.546 | 0.721 | 0.284 | 1        | 25 |
| Wfdc1         | -0.439 | 0.61  | 0.235 | 1        | 25 |
| Pgc           | -0.680 | 0.935 | 0.593 | 1        | 25 |
| Foxf2         | -0.376 | 0.604 | 0.148 | 1        | 25 |
| Tnc           | -0.707 | 0.63  | 0.185 | 1        | 25 |
| Dcn           | 0.303  | 0.545 | 0.16  | 1        | 25 |
| Ltbp1         | -0.579 | 0.818 | 0.395 | 1        | 25 |
| Rgs5          | -0.831 | 0.994 | 0.543 | 1        | 25 |
| Adamts1       | -0.286 | 0.656 | 0.309 | 1        | 25 |
| Nes           | -0.276 | 0.591 | 0.123 | 1        | 25 |
| Gm26917       | -0.300 | 0.597 | 0.136 | 1        | 25 |
| Col1a1        | -0.278 | 0.675 | 0.272 | 1        | 25 |
| Pla2g1b       | -0.916 | 0.987 | 0.556 | 1        | 25 |
| Hspa1a        | -0.670 | 0.76  | 0.395 | 1        | 25 |
| Csf1          | -0.349 | 0.571 | 0.111 | 1        | 25 |
| Bok           | 0.254  | 0.545 | 0.062 | 1        | 25 |
| Tmem176a      | 0.326  | 0.617 | 0.247 | 1        | 25 |
| Col5a1        | -0.329 | 0.552 | 0.111 | 1        | 25 |
| Ppp1r15a      | 0.456  | 0.968 | 0.667 | 1        | 25 |
| Cnn1          | -0.288 | 0.831 | 0.531 | 1        | 25 |
| Cnn2          | -0.394 | 0.786 | 0.383 | 1        | 25 |
| Gm13889       | -0.284 | 0.994 | 0.63  | 1        | 25 |
| Thbs1         | -0.709 | 0.961 | 0.556 | 1        | 25 |
| H2-K1         | -0.470 | 0.74  | 0.358 | 1        | 25 |
| Tnni3         | 0.291  | 1     | 0.026 | 1.22E-24 | 26 |
| Tph1          | -0.474 | 0.964 | 0.052 | 4.45E-20 | 26 |
| Gbp2b         | -0.428 | 1     | 0.065 | 4.64E-20 | 26 |
| Hgfac         | -0.315 | 0.072 | 0.104 | 9.03E-20 | 26 |
| Atp4a         | -0.482 | 0.988 | 0.065 | 6.01E-19 | 26 |
| Pnoc          | -1.402 | 0.072 | 0.234 | 4.95E-18 | 26 |
| Gsta4         | 0.362  | 1     | 0.091 | 7.46E-18 | 26 |
| 4930539E08Rik | -0.339 | 0.964 | 0.078 | 2.18E-17 | 26 |
| Neurl3        | -0.321 | 0.952 | 0.078 | 6.36E-17 | 26 |
| Lgr4          | -0.265 | 0.988 | 0.091 | 2.25E-16 | 26 |
| Lyz2          | 0.291  | 0.108 | 0.013 | 2.35E-16 | 26 |
| Ly6a          | -0.628 | 1     | 0.104 | 4.04E-16 | 26 |
| Col4a1        | -0.289 | 0.108 | 0.052 | 4.69E-16 | 26 |
| Ogfrl1        | 0.321  | 0.108 | 0     | 7.30E-16 | 26 |
| Clic6         | -0.503 | 0.12  | 0.117 | 8.96E-16 | 26 |
| Ppargc1a      | -0.256 | 0.976 | 0.091 | 1.14E-15 | 26 |
| Palld         | -0.282 | 0.964 | 0.078 | 1.34E-15 | 26 |
| Mfge8         | -0.311 | 0.12  | 0.065 | 1.52E-15 | 26 |
| Fabp5         | -0.322 | 0.976 | 0.091 | 1.52E-15 | 26 |
| Hspa1b        | -0.311 | 1     | 0.117 | 1.81E-15 | 26 |
| Ddit4         | 0.267  | 0.952 | 0.078 | 4.65E-15 | 26 |
| Pyy           | -0.417 | 0.928 | 0.091 | 5.34E-15 | 26 |
| Spink4        | -0.313 | 1     | 0.117 | 6.21E-15 | 26 |
| Cym           | -0.684 | 1     | 0.117 | 6.40E-15 | 26 |
| Ctse          | -0.665 | 0.145 | 0.195 | 2.23E-14 | 26 |

|               |        |       |       |          |    |
|---------------|--------|-------|-------|----------|----|
| Cyr61         | -0.587 | 0.988 | 0.117 | 4.23E-14 | 26 |
| Pkib          | -0.292 | 0.133 | 0.117 | 1.17E-13 | 26 |
| Ptpn18        | -0.331 | 0.145 | 0.065 | 1.45E-13 | 26 |
| Car8          | 0.264  | 0.976 | 0.13  | 3.72E-13 | 26 |
| 8430408G22Rik | -0.255 | 0.94  | 0.091 | 1.18E-12 | 26 |
| Gkn3          | -0.854 | 1     | 0.143 | 1.20E-12 | 26 |
| Cck           | -0.730 | 0.916 | 0.117 | 3.21E-12 | 26 |
| Agr2          | -0.388 | 1     | 0.156 | 8.39E-12 | 26 |
| Sct           | 0.941  | 0.145 | 0.039 | 1.12E-11 | 26 |
| Maff          | 0.361  | 0.976 | 0.156 | 1.84E-11 | 26 |
| Ctxn2         | -0.335 | 0.952 | 0.143 | 2.02E-11 | 26 |
| Gpx3          | -1.720 | 0.217 | 0.377 | 3.01E-11 | 26 |
| Degs2         | -0.251 | 0.181 | 0.091 | 5.97E-11 | 26 |
| Slco2a1       | -0.351 | 0.181 | 0.091 | 6.30E-11 | 26 |
| Gm11361       | -0.399 | 1     | 0.169 | 1.08E-10 | 26 |
| Gm11808       | -0.365 | 1     | 0.169 | 1.17E-10 | 26 |
| Muc6          | -0.793 | 1     | 0.169 | 1.37E-10 | 26 |
| Sult1c2       | -0.394 | 0.193 | 0.104 | 2.81E-10 | 26 |
| Cd83          | -0.321 | 0.169 | 0.026 | 3.12E-10 | 26 |
| Arc           | -0.439 | 0.205 | 0.247 | 3.35E-10 | 26 |
| Fgl2          | -0.470 | 0.988 | 0.169 | 3.46E-10 | 26 |
| Nfasc         | -0.415 | 0.976 | 0.169 | 3.70E-10 | 26 |
| Chka          | -0.429 | 1     | 0.195 | 5.39E-10 | 26 |
| Rnase4        | -0.358 | 0.952 | 0.156 | 6.30E-10 | 26 |
| Me1           | -0.296 | 0.205 | 0.104 | 1.21E-09 | 26 |
| Apoa1         | 0.401  | 0.193 | 0.039 | 1.28E-09 | 26 |
| Dusp5         | -0.444 | 0.964 | 0.156 | 2.57E-09 | 26 |
| Wars          | -0.275 | 0.988 | 0.182 | 5.15E-09 | 26 |
| Tuba1c        | -0.253 | 0.217 | 0.13  | 6.12E-09 | 26 |
| H2-T23        | -0.549 | 1     | 0.195 | 6.46E-09 | 26 |
| Abhd2         | -0.255 | 0.964 | 0.169 | 1.01E-08 | 26 |
| Zfp3612       | -0.334 | 0.976 | 0.182 | 1.20E-08 | 26 |
| Ndrp1         | -0.273 | 0.976 | 0.182 | 1.47E-08 | 26 |
| Sox4          | -0.254 | 0.976 | 0.195 | 3.52E-08 | 26 |
| Pigr          | -0.642 | 1     | 0.221 | 6.59E-07 | 26 |
| Syt5          | -0.541 | 0.241 | 0.156 | 9.90E-07 | 26 |
| Mllt3         | -0.405 | 0.253 | 0.104 | 1.21E-06 | 26 |
| Id1           | -0.404 | 1     | 0.234 | 1.36E-06 | 26 |
| Anxa10        | -0.306 | 0.964 | 0.208 | 2.08E-06 | 26 |
| Nbl1          | 0.289  | 0.217 | 0.026 | 2.23E-06 | 26 |
| Pglyrp1       | -0.477 | 0.988 | 0.221 | 2.39E-06 | 26 |
| Iapp          | 1.004  | 0.229 | 0     | 7.20E-06 | 26 |
| Nkx6-3        | -0.859 | 0.952 | 0.221 | 8.17E-06 | 26 |
| Lbh           | -0.267 | 0.265 | 0.091 | 8.59E-06 | 26 |
| Spp1          | 1.433  | 0.53  | 0.039 | 1.34E-05 | 26 |
| Penk          | -0.878 | 0.422 | 0.013 | 1.51E-05 | 26 |
| Mrln          | -0.428 | 0.289 | 0.234 | 1.56E-05 | 26 |
| Trp53inp1     | -0.652 | 1     | 0.247 | 1.58E-05 | 26 |
| S100a6        | -0.590 | 0.952 | 0.208 | 1.84E-05 | 26 |
| Ascl1         | -0.258 | 0.446 | 0.039 | 4.38E-05 | 26 |



|               |        |       |       |             |    |
|---------------|--------|-------|-------|-------------|----|
| lfrd1         | -0.290 | 0.916 | 0.208 | 6.64E-05    | 26 |
| Socs3         | 0.410  | 0.265 | 0.026 | 6.91E-05    | 26 |
| AY036118      | 0.452  | 1     | 0.286 | 8.63E-05    | 26 |
| 2210407C18Rik | -0.372 | 1     | 0.273 | 9.94E-05    | 26 |
| Gm26917       | -0.714 | 1     | 0.273 | 0.000116254 | 26 |
| Idi1          | -0.344 | 0.301 | 0.13  | 0.000179412 | 26 |
| Ddc           | -0.305 | 0.952 | 0.26  | 0.000181432 | 26 |
| Mt2           | -0.766 | 0.337 | 0.234 | 0.000283494 | 26 |
| lfi27l2a      | -0.428 | 0.47  | 0.039 | 0.000401842 | 26 |
| Fam46c        | -0.315 | 0.301 | 0.104 | 0.000524112 | 26 |
| Plac8         | -0.585 | 1     | 0.286 | 0.000664046 | 26 |
| Id2           | -0.481 | 1     | 0.286 | 0.000783515 | 26 |
| Gm11837       | 0.404  | 0.88  | 0.234 | 0.000871073 | 26 |
| Klf4          | -0.458 | 0.964 | 0.26  | 0.001520437 | 26 |
| Fdps          | 0.304  | 0.301 | 0.052 | 0.00290892  | 26 |
| Clu           | -1.682 | 0.699 | 0.623 | 0.003248476 | 26 |
| Lmo4          | -0.491 | 0.398 | 0.325 | 0.003355918 | 26 |
| H2-Ab1        | 0.330  | 1     | 0.403 | 0.004019625 | 26 |
| Umod          | -0.262 | 0.289 | 0.013 | 0.005162673 | 26 |
| Mgst3         | -0.298 | 0.349 | 0.182 | 0.005258494 | 26 |
| Malat1        | -0.858 | 1     | 0.961 | 0.009786476 | 26 |
| C2cd4b        | -0.250 | 0.361 | 0.195 | 0.012890122 | 26 |
| Olfml3        | -0.361 | 0.301 | 0.039 | 0.017558613 | 26 |
| Vsig1         | -0.412 | 0.386 | 0.234 | 0.024514613 | 26 |
| Pax6          | -0.755 | 0.964 | 0.299 | 0.037718009 | 26 |
| Peg10         | -1.020 | 0.229 | 0.013 | 0.106027134 | 26 |
| AA467197      | -0.303 | 0.422 | 0.091 | 0.167012416 | 26 |
| Rgs5          | -0.493 | 0.217 | 0.013 | 0.190423106 | 26 |
| Hhex          | 0.346  | 0.349 | 0.065 | 0.485982192 | 26 |
| Acsl1         | -0.384 | 0.952 | 0.39  | 1           | 26 |
| Actb          | -0.849 | 0.976 | 0.805 | 1           | 26 |
| Pcsk1         | -0.594 | 0.53  | 0.403 | 1           | 26 |
| Csrp1         | -0.335 | 0.41  | 0.156 | 1           | 26 |
| Sprr2a3       | 1.275  | 1     | 0.364 | 1           | 26 |
| Ghrl          | 0.553  | 0.952 | 0.649 | 1           | 26 |
| Gast          | -6.951 | 0.964 | 0.351 | 1           | 26 |
| Pcsk2         | -0.746 | 0.651 | 0.545 | 1           | 26 |
| Pcsk1n        | 0.286  | 0.916 | 0.584 | 1           | 26 |
| Hist1h1c      | -0.838 | 0.952 | 0.351 | 1           | 26 |
| Etv1          | -0.607 | 0.964 | 0.39  | 1           | 26 |
| Cd177         | -0.598 | 0.494 | 0.299 | 1           | 26 |
| Hap1          | -0.905 | 0.964 | 0.364 | 1           | 26 |
| Ptprn         | -0.658 | 0.518 | 0.286 | 1           | 26 |
| Tm4sf4        | -0.579 | 0.831 | 0.701 | 1           | 26 |
| Klf2          | -0.574 | 0.566 | 0.351 | 1           | 26 |
| Mt1           | -0.623 | 0.675 | 0.558 | 1           | 26 |
| Gadd45g       | 0.401  | 0.518 | 0.39  | 1           | 26 |
| Chgb          | -1.808 | 0.88  | 0.701 | 1           | 26 |
| Igfbp7        | 0.696  | 0.434 | 0.091 | 1           | 26 |
| Ctsl          | -0.735 | 0.639 | 0.442 | 1           | 26 |

|         |        |       |       |          |    |
|---------|--------|-------|-------|----------|----|
| Krt8    | -0.687 | 0.831 | 0.623 | 1        | 26 |
| Tubb4b  | -0.426 | 0.542 | 0.299 | 1        | 26 |
| Smpd3   | -0.313 | 1     | 0.506 | 1        | 26 |
| Neurod1 | -0.307 | 0.976 | 0.506 | 1        | 26 |
| Rps29   | -0.343 | 1     | 0.831 | 1        | 26 |
| Pgc     | 0.282  | 0.976 | 0.558 | 1        | 26 |
| Prnp    | -0.374 | 0.518 | 0.234 | 1        | 26 |
| Anpep   | -0.434 | 0.566 | 0.338 | 1        | 26 |
| Pam     | -1.108 | 0.976 | 0.701 | 1        | 26 |
| Chga    | -0.700 | 0.988 | 0.883 | 1        | 26 |
| Cpe     | -0.489 | 0.867 | 0.714 | 1        | 26 |
| Fhl2    | -0.310 | 0.542 | 0.273 | 1        | 26 |
| Clic1   | -0.530 | 0.59  | 0.299 | 1        | 26 |
| Gkn2    | 0.696  | 0.867 | 0.506 | 1        | 26 |
| Ambp    | -1.045 | 0.675 | 0.182 | 1        | 26 |
| Rbp4    | -0.353 | 0.831 | 0.429 | 1        | 26 |
| Acot7   | 0.317  | 0.602 | 0.117 | 1        | 26 |
| Atp5k   | -0.623 | 1     | 0.494 | 1        | 26 |
| Gkn1    | 0.887  | 0.831 | 0.506 | 1        | 26 |
| Slc38a5 | -0.833 | 0.458 | 0.039 | 1        | 26 |
| Baiap3  | -0.362 | 0.554 | 0.26  | 1        | 26 |
| H2afz   | -0.295 | 0.771 | 0.364 | 1        | 26 |
| Neat1   | -0.680 | 0.988 | 0.532 | 1        | 26 |
| Prdx1   | -0.368 | 0.976 | 0.675 | 1        | 26 |
| Psca    | -0.268 | 0.723 | 0.494 | 1        | 26 |
| Scg5    | -0.291 | 1     | 0.766 | 1        | 26 |
| Peg3    | -1.119 | 0.952 | 0.597 | 1        | 26 |
| Scg2    | -0.482 | 0.602 | 0.247 | 1        | 26 |
| Krt7    | -0.399 | 0.687 | 0.403 | 1        | 26 |
| Sst     | 0.855  | 0.53  | 0.26  | 1        | 26 |
| Gm42418 | 1.083  | 0.916 | 0.571 | 1        | 26 |
| Tagln2  | -0.376 | 0.735 | 0.416 | 1        | 26 |
| Zfp36   | 0.369  | 0.711 | 0.442 | 1        | 26 |
| Tff1    | 0.592  | 1     | 0.792 | 1        | 26 |
| Rps2    | -0.664 | 1     | 0.597 | 1        | 26 |
| Tmsb10  | -0.283 | 0.928 | 0.688 | 1        | 26 |
| Rps15   | -0.253 | 1     | 0.649 | 1        | 26 |
| Rpl17   | -0.481 | 1     | 0.61  | 1        | 26 |
| mt-Nd3  | -0.755 | 1     | 0.545 | 1        | 26 |
| Insm1   | -0.488 | 0.675 | 0.312 | 1        | 26 |
| Dusp1   | -0.371 | 0.831 | 0.532 | 1        | 26 |
| Sectm1b | 1.232  | 1     | 0.014 | 3.15E-27 | 27 |
| Gsta3   | 0.716  | 1     | 0.021 | 7.67E-25 | 27 |
| Ethe1   | 1.522  | 1     | 0.027 | 5.92E-23 | 27 |
| Hyal2   | 0.635  | 0.846 | 0.014 | 1.08E-21 | 27 |
| Bex2    | 0.784  | 0.769 | 0.007 | 1.84E-21 | 27 |
| Clic3   | 1.022  | 0.923 | 0.007 | 8.75E-21 | 27 |
| Pparg   | -0.298 | 1     | 0.034 | 1.16E-20 | 27 |
| Isg15   | 0.823  | 1     | 0.041 | 2.73E-19 | 27 |
| Dqx1    | -0.267 | 1     | 0.041 | 5.29E-19 | 27 |

|          |        |       |       |          |    |
|----------|--------|-------|-------|----------|----|
| Apoe     | -0.314 | 1     | 0.041 | 5.29E-19 | 27 |
| Krt7     | -0.285 | 1     | 0.048 | 1.65E-17 | 27 |
| Reg3g    | -0.295 | 1     | 0.048 | 1.65E-17 | 27 |
| Cd93     | -0.307 | 0.923 | 0.041 | 1.17E-16 | 27 |
| Dbnidd2  | 0.352  | 1     | 0.055 | 1.86E-16 | 27 |
| Gbp2     | -0.301 | 1     | 0.055 | 3.69E-16 | 27 |
| Gsdmc3   | -0.428 | 1     | 0.055 | 3.69E-16 | 27 |
| Ndrp1    | 0.592  | 1     | 0.062 | 2.69E-15 | 27 |
| Ifi2712b | -0.254 | 1     | 0.062 | 6.20E-15 | 27 |
| Lig1     | -0.270 | 1     | 0.062 | 6.20E-15 | 27 |
| Lrp2     | -0.310 | 1     | 0.062 | 6.20E-15 | 27 |
| Mlph     | -0.381 | 1     | 0.062 | 6.20E-15 | 27 |
| Chga     | -0.799 | 1     | 0.062 | 6.20E-15 | 27 |
| Ces2c    | 0.960  | 0.846 | 0     | 7.57E-15 | 27 |
| Lgals4   | 0.586  | 0.923 | 0.034 | 2.65E-14 | 27 |
| Areg     | -0.365 | 1     | 0.068 | 8.15E-14 | 27 |
| Igha     | -0.417 | 1     | 0.068 | 8.15E-14 | 27 |
| Cxcr4    | -0.313 | 0.846 | 0.048 | 4.42E-13 | 27 |
| Uhrf1    | -0.411 | 0.846 | 0.048 | 4.42E-13 | 27 |
| Myc      | 0.296  | 0.923 | 0.041 | 4.98E-13 | 27 |
| Mllt3    | -0.325 | 1     | 0.075 | 8.61E-13 | 27 |
| Igkc     | -0.365 | 1     | 0.075 | 8.61E-13 | 27 |
| Sytl2    | -0.388 | 1     | 0.075 | 8.61E-13 | 27 |
| Sfn9     | -0.514 | 1     | 0.075 | 8.61E-13 | 27 |
| Cdkn3    | 0.851  | 0.769 | 0.021 | 2.25E-12 | 27 |
| Deaf1    | 0.958  | 0.923 | 0.048 | 2.64E-12 | 27 |
| Me1      | 0.437  | 1     | 0.082 | 2.88E-12 | 27 |
| Reg1     | -0.362 | 0.846 | 0.055 | 6.37E-12 | 27 |
| Gkn3     | -0.345 | 1     | 0.082 | 7.51E-12 | 27 |
| Lysr     | -0.362 | 1     | 0.082 | 7.51E-12 | 27 |
| Gbp7     | -0.396 | 1     | 0.082 | 7.51E-12 | 27 |
| Arl14    | -0.426 | 1     | 0.082 | 7.51E-12 | 27 |
| Spry1    | -0.431 | 1     | 0.082 | 7.51E-12 | 27 |
| Cpn1     | -0.300 | 0.923 | 0.048 | 9.02E-12 | 27 |
| Ly6d     | -0.316 | 0.923 | 0.048 | 9.02E-12 | 27 |
| Mcm6     | -0.325 | 0.923 | 0.048 | 9.02E-12 | 27 |
| Gstp2    | 0.492  | 1     | 0.089 | 2.06E-11 | 27 |
| Cyp4v3   | 0.263  | 0.538 | 0.014 | 2.42E-11 | 27 |
| Crip2    | 0.631  | 0.923 | 0.055 | 4.57E-11 | 27 |
| Cdkn1a   | -0.310 | 0.154 | 0.034 | 5.23E-11 | 27 |
| Ppp1r15a | -0.433 | 1     | 0.089 | 5.53E-11 | 27 |
| Gm4841   | -0.319 | 0.769 | 0.048 | 5.65E-11 | 27 |
| Gbp4     | -0.486 | 0.923 | 0.075 | 6.72E-11 | 27 |
| Plvap    | -0.449 | 0.846 | 0.062 | 7.02E-11 | 27 |
| Tmed6    | 0.430  | 0.154 | 0.034 | 8.13E-11 | 27 |
| Melk     | -0.314 | 0.923 | 0.055 | 8.85E-11 | 27 |
| Edem1    | -0.348 | 0.923 | 0.055 | 8.85E-11 | 27 |
| Ppt1     | -0.394 | 0.923 | 0.055 | 8.85E-11 | 27 |
| Sgk1     | 0.320  | 0.154 | 0.041 | 1.89E-10 | 27 |
| Kif23    | -0.257 | 1     | 0.096 | 3.26E-10 | 27 |

|           |        |       |       |          |    |
|-----------|--------|-------|-------|----------|----|
| S100a13   | -0.486 | 1     | 0.096 | 3.50E-10 | 27 |
| Tpx2      | -0.579 | 1     | 0.096 | 3.50E-10 | 27 |
| Apoa4     | 0.656  | 0.692 | 0.021 | 4.20E-10 | 27 |
| Try10     | 0.703  | 0.154 | 0     | 5.98E-10 | 27 |
| Anpep     | -0.329 | 0.923 | 0.062 | 7.03E-10 | 27 |
| Dut       | 0.363  | 1     | 0.103 | 7.34E-10 | 27 |
| Soat1     | -0.437 | 0.154 | 0.055 | 1.35E-09 | 27 |
| Ect2      | -0.887 | 0.077 | 0.151 | 1.76E-09 | 27 |
| Gclc      | -0.321 | 1     | 0.103 | 1.94E-09 | 27 |
| Smpd3     | -0.349 | 1     | 0.103 | 1.94E-09 | 27 |
| Cdca8     | 0.962  | 0.923 | 0.103 | 4.58E-09 | 27 |
| Tyms      | 0.920  | 0.154 | 0.055 | 4.64E-09 | 27 |
| Fam3b     | -0.319 | 0.923 | 0.068 | 4.66E-09 | 27 |
| S100a1    | 0.378  | 1     | 0.116 | 1.42E-08 | 27 |
| Esco2     | -0.610 | 0.923 | 0.096 | 1.61E-08 | 27 |
| Creb3l4   | -0.403 | 0.923 | 0.075 | 2.63E-08 | 27 |
| Cxcl10    | -0.520 | 0.769 | 0.068 | 4.02E-08 | 27 |
| H2-DMb1   | -0.363 | 1     | 0.116 | 4.18E-08 | 27 |
| Hamp2     | -0.470 | 1     | 0.116 | 4.18E-08 | 27 |
| Hist1h2ae | -0.546 | 1     | 0.116 | 4.18E-08 | 27 |
| Igtp      | -0.550 | 1     | 0.116 | 4.18E-08 | 27 |
| Sox4      | -0.590 | 1     | 0.116 | 4.18E-08 | 27 |
| Hes1      | -0.400 | 1     | 0.123 | 1.67E-07 | 27 |
| Icam1     | -0.352 | 0.846 | 0.068 | 2.47E-07 | 27 |
| Tmem176a  | 0.304  | 0.923 | 0.089 | 2.59E-07 | 27 |
| Basp1     | 0.723  | 0.846 | 0.048 | 2.70E-07 | 27 |
| Lockd     | 0.299  | 0.846 | 0.048 | 3.59E-07 | 27 |
| Akr1c14   | -0.271 | 0.846 | 0.048 | 5.12E-07 | 27 |
| Tk1       | 0.513  | 0.923 | 0.096 | 5.61E-07 | 27 |
| Pglyrp1   | -0.576 | 1     | 0.13  | 6.07E-07 | 27 |
| H2-DMb2   | -0.586 | 1     | 0.13  | 6.07E-07 | 27 |
| Irf1      | -0.642 | 1     | 0.13  | 6.07E-07 | 27 |
| Lypd8     | 0.856  | 1     | 0.144 | 6.34E-07 | 27 |
| Parm1     | 0.781  | 0.231 | 0.021 | 1.08E-06 | 27 |
| Hmmr      | -0.708 | 0.923 | 0.116 | 1.21E-06 | 27 |
| Gm10639   | 1.137  | 0.769 | 0.014 | 1.90E-06 | 27 |
| Gsdmc2    | 0.289  | 1     | 0.144 | 2.04E-06 | 27 |
| Ptpn18    | -0.585 | 0.923 | 0.096 | 2.15E-06 | 27 |
| Cenpe     | -0.701 | 0.923 | 0.123 | 4.19E-06 | 27 |
| Esrrg     | -0.362 | 0.692 | 0.048 | 4.54E-06 | 27 |
| Emp1      | -0.785 | 0.154 | 0.164 | 4.68E-06 | 27 |
| Gbp2b     | -0.672 | 1     | 0.144 | 6.36E-06 | 27 |
| Ppp1r3a   | -0.754 | 1     | 0.144 | 6.36E-06 | 27 |
| Kcnj16    | -0.354 | 0.231 | 0.041 | 7.39E-06 | 27 |
| Creld2    | -0.550 | 0.923 | 0.103 | 7.53E-06 | 27 |
| Cdk1      | -0.972 | 0.154 | 0.178 | 8.12E-06 | 27 |
| Papss2    | -0.289 | 0.846 | 0.062 | 1.05E-05 | 27 |
| Bace2     | 0.533  | 1     | 0.164 | 1.24E-05 | 27 |
| Ttr       | 0.595  | 0.231 | 0.041 | 1.26E-05 | 27 |
| Dpcr1     | 1.668  | 1     | 0.199 | 1.78E-05 | 27 |

|               |        |       |       |             |    |
|---------------|--------|-------|-------|-------------|----|
| Irgm1         | -0.855 | 1     | 0.151 | 1.85E-05    | 27 |
| Rbp7          | -0.449 | 0.615 | 0.062 | 2.00E-05    | 27 |
| Lpl           | 0.664  | 0.154 | 0     | 2.11E-05    | 27 |
| Gm26532       | 0.717  | 0.846 | 0.068 | 2.15E-05    | 27 |
| Me2           | 0.569  | 0.231 | 0.055 | 3.49E-05    | 27 |
| Hspb1         | -0.528 | 0.231 | 0.062 | 3.63E-05    | 27 |
| Pam           | 0.518  | 0.231 | 0.055 | 3.71E-05    | 27 |
| Hist1h1c      | -0.452 | 0.846 | 0.068 | 3.91E-05    | 27 |
| Tipin         | -0.487 | 0.846 | 0.068 | 3.91E-05    | 27 |
| Cxcl9         | -0.651 | 0.692 | 0.082 | 4.20E-05    | 27 |
| 2210404E10Rik | -0.324 | 0.923 | 0.116 | 6.41E-05    | 27 |
| Sprr2a1       | 0.542  | 1     | 0.178 | 7.65E-05    | 27 |
| Smc2          | -0.456 | 0.846 | 0.123 | 7.87E-05    | 27 |
| Lgr4          | -0.604 | 0.231 | 0.075 | 8.25E-05    | 27 |
| Clca3a2       | -0.743 | 0.923 | 0.144 | 0.000108572 | 27 |
| Pcna          | -0.758 | 1     | 0.164 | 0.000130634 | 27 |
| Sox9          | -0.616 | 1     | 0.164 | 0.000130639 | 27 |
| Bst2          | -0.709 | 1     | 0.164 | 0.000130639 | 27 |
| Iigp1         | -0.885 | 1     | 0.164 | 0.000130639 | 27 |
| Prima1        | 0.609  | 0.231 | 0.027 | 0.000142123 | 27 |
| Serpinh1      | 0.833  | 0.231 | 0.068 | 0.000187652 | 27 |
| Gsn           | 0.408  | 0.846 | 0.082 | 0.000193399 | 27 |
| Ckb           | 0.573  | 0.769 | 0.034 | 0.000208482 | 27 |
| Cd74          | -1.434 | 1     | 0.959 | 0.000228466 | 27 |
| Pla2g10       | -0.462 | 0.231 | 0.103 | 0.0002883   | 27 |
| Chka          | -0.721 | 1     | 0.171 | 0.000319709 | 27 |
| Tstd1         | -0.742 | 0.231 | 0.116 | 0.000466245 | 27 |
| Plk2          | -0.286 | 0.538 | 0.034 | 0.000495342 | 27 |
| Hist1h4n      | -0.776 | 0.923 | 0.13  | 0.00050219  | 27 |
| Tpm1          | 0.861  | 1     | 0.212 | 0.000508961 | 27 |
| Dusp1         | -0.744 | 1     | 0.178 | 0.000744782 | 27 |
| Apoa1         | 0.783  | 1     | 0.199 | 0.000797651 | 27 |
| F830016B08Rik | -0.535 | 0.538 | 0.062 | 0.000823895 | 27 |
| Tst           | 0.265  | 0.846 | 0.096 | 0.001382433 | 27 |
| Fdps          | 0.596  | 0.923 | 0.158 | 0.001457324 | 27 |
| H2-DMA        | -0.488 | 1     | 0.185 | 0.001657489 | 27 |
| S100a14       | 1.065  | 0.308 | 0     | 0.002841023 | 27 |
| Vstm2b        | 0.594  | 0.692 | 0     | 0.002841023 | 27 |
| Esd           | 0.798  | 1     | 0.26  | 0.004326273 | 27 |
| Nr4a1         | 0.300  | 0.769 | 0.055 | 0.005906564 | 27 |
| Pbk           | 0.679  | 0.615 | 0.103 | 0.006165561 | 27 |
| Nr4a2         | -0.371 | 0.769 | 0.055 | 0.008479976 | 27 |
| Klf4          | 0.700  | 1     | 0.253 | 0.00977105  | 27 |
| Ucp2          | 1.442  | 1     | 0.562 | 0.010186422 | 27 |
| Scgb2b7       | 0.357  | 0.308 | 0     | 0.011090285 | 27 |
| Gkn2          | 1.880  | 1     | 0.452 | 0.012056109 | 27 |
| Mal           | -0.263 | 0.308 | 0.027 | 0.016438908 | 27 |
| Tnn           | 0.538  | 0.308 | 0.027 | 0.019357624 | 27 |
| Gkn1          | 1.759  | 1     | 0.664 | 0.029111303 | 27 |
| Aldh3a1       | 0.500  | 0.308 | 0.041 | 0.030661423 | 27 |

|               |        |       |       |             |    |
|---------------|--------|-------|-------|-------------|----|
| Mgst2         | -0.588 | 0.846 | 0.116 | 0.030706028 | 27 |
| Gm3839        | 0.572  | 0.692 | 0.014 | 0.031212025 | 27 |
| Id1           | 0.721  | 1     | 0.288 | 0.036522088 | 27 |
| Nupr1         | 0.427  | 0.308 | 0.041 | 0.037505052 | 27 |
| Serpinb1a     | -0.383 | 0.308 | 0.055 | 0.045503721 | 27 |
| Far1          | -0.599 | 1     | 0.219 | 0.050521027 | 27 |
| Ubd           | -0.815 | 1     | 0.219 | 0.050521027 | 27 |
| Wars          | -0.882 | 1     | 0.219 | 0.050521027 | 27 |
| H2-T23        | -0.916 | 1     | 0.219 | 0.050521027 | 27 |
| Tff1          | 1.364  | 1     | 0.911 | 0.062082962 | 27 |
| Anxa3         | 0.451  | 0.308 | 0.055 | 0.066335537 | 27 |
| Aurkb         | 1.073  | 0.308 | 0.041 | 0.07124193  | 27 |
| Ctsl          | 0.273  | 0.308 | 0.062 | 0.082671601 | 27 |
| C2cd4a        | -0.669 | 0.308 | 0.082 | 0.085302013 | 27 |
| Sst           | -0.713 | 0.308 | 0.082 | 0.085302013 | 27 |
| Ly6e          | -0.804 | 1     | 0.226 | 0.090582132 | 27 |
| Clic1         | 0.551  | 1     | 0.274 | 0.095977284 | 27 |
| Nqo1          | 0.599  | 0.308 | 0.068 | 0.100778485 | 27 |
| Anxa1         | 0.375  | 0.308 | 0.068 | 0.100778485 | 27 |
| Hbegf         | -0.410 | 0.769 | 0.075 | 0.105936486 | 27 |
| Slbp          | -0.709 | 0.308 | 0.116 | 0.136200434 | 27 |
| mt-Nd3        | -0.711 | 1     | 0.233 | 0.138514636 | 27 |
| Ccnb1         | -0.460 | 0.308 | 0.137 | 0.187072766 | 27 |
| Aurka         | -0.438 | 0.154 | 0.062 | 0.19968364  | 27 |
| Hist1h1e      | -0.667 | 0.846 | 0.137 | 0.216514118 | 27 |
| Cxcl17        | -0.504 | 0.923 | 0.192 | 0.224266159 | 27 |
| Lmnb1         | 0.470  | 0.769 | 0.089 | 0.245066727 | 27 |
| Id2           | -0.940 | 0.923 | 0.192 | 0.273840742 | 27 |
| Ccnb2         | 1.186  | 0.308 | 0.075 | 0.326985708 | 27 |
| Idi1          | -0.652 | 0.923 | 0.199 | 0.445492857 | 27 |
| Pclaf         | 0.366  | 0.923 | 0.24  | 0.66897226  | 27 |
| Bpifb1        | -1.471 | 1     | 0.253 | 0.715484536 | 27 |
| Ube2c         | 1.233  | 0.923 | 0.377 | 0.964928251 | 27 |
| Timp3         | -0.365 | 0.538 | 0.055 | 1           | 27 |
| Cfi           | -0.468 | 0.769 | 0.103 | 1           | 27 |
| Top2a         | -0.431 | 0.923 | 0.253 | 1           | 27 |
| Gstp1         | -0.910 | 0.385 | 0.479 | 1           | 27 |
| 2200002D01Rik | -0.409 | 0.923 | 0.226 | 1           | 27 |
| Ppp2r1b       | 0.455  | 0.692 | 0.048 | 1           | 27 |
| H2afx         | -0.781 | 0.846 | 0.164 | 1           | 27 |
| A4gnt         | -0.347 | 0.692 | 0.048 | 1           | 27 |
| Cd36          | -0.423 | 0.615 | 0.055 | 1           | 27 |
| Hmgcs1        | -0.774 | 1     | 0.274 | 1           | 27 |
| Mcm5          | 0.262  | 0.692 | 0.055 | 1           | 27 |
| Id3           | -0.307 | 1     | 0.295 | 1           | 27 |
| Atp4b         | 0.964  | 0.846 | 0.219 | 1           | 27 |
| Birc5         | 0.645  | 0.846 | 0.219 | 1           | 27 |
| Ifrd1         | -0.669 | 0.769 | 0.116 | 1           | 27 |
| Fgfbp1        | -0.862 | 0.385 | 0.212 | 1           | 27 |
| Foxq1         | -0.554 | 1     | 0.295 | 1           | 27 |

|               |        |       |       |   |    |
|---------------|--------|-------|-------|---|----|
| Tuba1b        | 0.742  | 0.923 | 0.377 | 1 | 27 |
| B930036N10Rik | 0.395  | 0.385 | 0.014 | 1 | 27 |
| Pdlim1        | -0.332 | 0.692 | 0.068 | 1 | 27 |
| Agpat2        | -0.468 | 0.692 | 0.068 | 1 | 27 |
| Cdc20         | -0.789 | 0.385 | 0.13  | 1 | 27 |
| Rrm2          | -0.491 | 0.615 | 0.075 | 1 | 27 |
| Sfn           | -0.350 | 0.385 | 0.041 | 1 | 27 |
| Sult1d1       | -0.517 | 0.385 | 0.103 | 1 | 27 |
| Mt2           | -0.330 | 0.385 | 0.192 | 1 | 27 |
| Cyr61         | -0.361 | 0.385 | 0.048 | 1 | 27 |
| Tcim          | -0.518 | 0.385 | 0.068 | 1 | 27 |
| Zfp36         | -1.309 | 1     | 0.301 | 1 | 27 |
| Fkbp11        | -0.352 | 0.615 | 0.041 | 1 | 27 |
| Ier3          | 0.875  | 0.385 | 0.034 | 1 | 27 |
| Slc45a3       | 0.993  | 0.615 | 0.007 | 1 | 27 |
| Tubb5         | 0.747  | 0.923 | 0.425 | 1 | 27 |
| Fabp3         | 0.632  | 0.385 | 0.055 | 1 | 27 |
| Wfdc2         | 0.365  | 0.769 | 0.178 | 1 | 27 |
| Ptgr1         | 0.270  | 0.385 | 0.151 | 1 | 27 |
| Pde4b         | -0.451 | 0.231 | 0.048 | 1 | 27 |
| Nfe2l2        | 0.309  | 0.846 | 0.281 | 1 | 27 |
| S100a11       | 1.036  | 1     | 0.589 | 1 | 27 |
| Cks1b         | 0.922  | 0.692 | 0.11  | 1 | 27 |
| Pga5          | -0.596 | 0.769 | 0.164 | 1 | 27 |
| Krt8          | 0.824  | 1     | 0.829 | 1 | 27 |
| Ifi27         | -0.897 | 0.769 | 0.164 | 1 | 27 |
| Tmem176b      | -0.621 | 0.692 | 0.096 | 1 | 27 |
| Gsdma2        | 0.399  | 1     | 0.356 | 1 | 27 |
| Neat1         | -0.669 | 1     | 0.349 | 1 | 27 |
| Rps2          | -0.301 | 0.462 | 0.527 | 1 | 27 |
| Phlda1        | -0.904 | 0.769 | 0.171 | 1 | 27 |
| H2afz         | -0.511 | 0.846 | 0.801 | 1 | 27 |
| Car2          | 0.864  | 0.846 | 0.671 | 1 | 27 |
| H2-Aa         | -1.156 | 1     | 0.664 | 1 | 27 |
| Prdx1         | -0.429 | 0.692 | 0.836 | 1 | 27 |
| Gm42418       | 0.436  | 1     | 0.979 | 1 | 27 |
| Actb          | -0.437 | 0.923 | 0.884 | 1 | 27 |
| Hells         | -0.679 | 0.692 | 0.116 | 1 | 27 |
| Oit1          | -0.777 | 0.615 | 0.541 | 1 | 27 |
| C2cd4b        | -0.553 | 0.615 | 0.082 | 1 | 27 |
| Gm26917       | -1.940 | 1     | 0.658 | 1 | 27 |
| Egln3         | -0.262 | 0.615 | 0.041 | 1 | 27 |
| Gsto1         | 0.314  | 0.462 | 0.438 | 1 | 27 |
| Ggh           | 1.242  | 0.615 | 0.062 | 1 | 27 |
| Malat1        | -0.480 | 1     | 0.932 | 1 | 27 |
| Vsig1         | -0.486 | 0.615 | 0.575 | 1 | 27 |
| Sult1c2       | 0.644  | 0.769 | 0.267 | 1 | 27 |
| Gsr           | 0.976  | 0.769 | 0.425 | 1 | 27 |
| Thbs1         | -0.536 | 0.231 | 0.075 | 1 | 27 |
| Gsta4         | 0.597  | 0.923 | 0.678 | 1 | 27 |

|           |        |       |       |   |    |
|-----------|--------|-------|-------|---|----|
| Cotl1     | -0.358 | 0.462 | 0.13  | 1 | 27 |
| Sdcbp2    | -0.316 | 0.462 | 0.123 | 1 | 27 |
| Tesc      | 0.851  | 0.615 | 0.068 | 1 | 27 |
| Gm42047   | -0.308 | 0.154 | 0.055 | 1 | 27 |
| Cst3      | -0.707 | 0.538 | 0.322 | 1 | 27 |
| Cavin3    | -0.290 | 0.154 | 0.041 | 1 | 27 |
| Gfpt1     | -1.130 | 1     | 0.384 | 1 | 27 |
| Maged2    | 0.846  | 0.154 | 0     | 1 | 27 |
| AY036118  | 1.137  | 1     | 0.918 | 1 | 27 |
| Agr2      | 0.399  | 0.923 | 0.589 | 1 | 27 |
| Krt19     | 1.048  | 1     | 0.658 | 1 | 27 |
| Tkt       | 0.641  | 0.462 | 0.226 | 1 | 27 |
| Gm10260   | 0.500  | 0.462 | 0.13  | 1 | 27 |
| Oxct1     | 0.433  | 0.462 | 0.123 | 1 | 27 |
| Mt1       | -0.319 | 0.846 | 0.801 | 1 | 27 |
| Hist1h2ap | -1.613 | 1     | 0.397 | 1 | 27 |
| Tuba1c    | 0.586  | 0.462 | 0.185 | 1 | 27 |
| Nfkbia    | -0.373 | 0.462 | 0.055 | 1 | 27 |
| Msn       | -0.385 | 0.154 | 0.055 | 1 | 27 |
| Fabp4     | -0.896 | 0.615 | 0.123 | 1 | 27 |
| Hist1h2af | 0.429  | 0.154 | 0.062 | 1 | 27 |
| Sprr2a3   | 2.440  | 1     | 0.767 | 1 | 27 |
| Fbln1     | -0.373 | 0.462 | 0.041 | 1 | 27 |
| Rflnb     | 0.504  | 0.846 | 0.39  | 1 | 27 |
| Hspa1a    | -1.612 | 0.615 | 0.329 | 1 | 27 |
| Cyp2s1    | 0.410  | 0.462 | 0.041 | 1 | 27 |
| Insig1    | 0.615  | 0.615 | 0.103 | 1 | 27 |
| Plk1      | 0.748  | 0.462 | 0.041 | 1 | 27 |
| Rbp2      | 0.346  | 0.615 | 0.096 | 1 | 27 |
| Bex4      | 0.427  | 0.462 | 0.034 | 1 | 27 |
| Muc5ac    | -0.565 | 0.538 | 0.24  | 1 | 27 |
| Prc1      | -0.842 | 0.462 | 0.144 | 1 | 27 |
| AW112010  | 0.984  | 1     | 0.452 | 1 | 27 |
| Nme2      | 0.333  | 1     | 0.658 | 1 | 27 |
| Tubb4b    | 1.021  | 0.615 | 0.308 | 1 | 27 |
| H2-Ab1    | -0.905 | 1     | 0.582 | 1 | 27 |
| Dmbt1     | -1.575 | 1     | 0.425 | 1 | 27 |
| Cym       | -0.939 | 1     | 0.459 | 1 | 27 |
| Kpna2     | 0.401  | 0.615 | 0.13  | 1 | 27 |
| Rdx       | 0.389  | 0.231 | 0.021 | 1 | 27 |
| Atf3      | -0.989 | 0.538 | 0.178 | 1 | 27 |
| Rpl17     | -0.355 | 0.769 | 0.63  | 1 | 27 |
| Rpl9-ps6  | 0.542  | 1     | 0.747 | 1 | 27 |
| Pla2g1b   | 0.719  | 1     | 0.986 | 1 | 27 |
| Col4a2    | -0.476 | 0.231 | 0.062 | 1 | 27 |
| Muc6      | -1.733 | 1     | 0.445 | 1 | 27 |
| Lars2     | -1.470 | 1     | 0.555 | 1 | 27 |
| S100a6    | 1.104  | 1     | 0.637 | 1 | 27 |
| Tmsb10    | 0.454  | 1     | 0.911 | 1 | 27 |
| Ly6a      | -1.289 | 1     | 0.452 | 1 | 27 |



|               |        |       |       |             |    |
|---------------|--------|-------|-------|-------------|----|
| Pigr          | -1.157 | 1     | 0.452 | 1           | 27 |
| 2210407C18Rik | 0.739  | 1     | 0.699 | 1           | 27 |
| Bcr           | -0.294 | 0.385 | 0.034 | 1           | 27 |
| Cytip         | -0.285 | 0.462 | 0.034 | 1           | 27 |
| Arf2          | -0.252 | 0.462 | 0.041 | 1           | 27 |
| Gstm1         | 0.346  | 0.615 | 0.39  | 1           | 27 |
| H2-Eb1        | -0.682 | 1     | 0.473 | 1           | 27 |
| Prnp          | -0.261 | 0.538 | 0.041 | 1           | 27 |
| Dnajb1        | -1.095 | 0.615 | 0.219 | 1           | 27 |
| Rps15         | -0.308 | 1     | 0.637 | 1           | 27 |
| Chia1         | 0.338  | 0.615 | 0.397 | 1           | 27 |
| Stmn1         | 0.467  | 0.615 | 0.212 | 1           | 27 |
| Atp5k         | -1.063 | 1     | 0.548 | 1           | 27 |
| Hspa1b        | -1.735 | 1     | 0.486 | 1           | 27 |
| Cebpb         | 0.948  | 0.538 | 0.075 | 1           | 27 |
| Ltc4s         | 0.553  | 0.308 | 0.007 | 1           | 27 |
| 3110079O15Rik | 0.278  | 1     | 0.024 | 2.76E-12    | 29 |
| Cd52          | -0.267 | 1     | 0.024 | 2.76E-12    | 29 |
| Jchain        | -0.299 | 0.857 | 0.024 | 1.32E-09    | 29 |
| Dqx1          | 0.748  | 1     | 0.06  | 6.72E-08    | 29 |
| Mal           | -0.270 | 1     | 0.06  | 1.58E-07    | 29 |
| Hbb-bs        | -0.373 | 1     | 0.06  | 1.58E-07    | 29 |
| Dbnidd2       | 0.508  | 1     | 0.072 | 7.75E-07    | 29 |
| Ptgr1         | 0.376  | 1     | 0.084 | 6.31E-06    | 29 |
| Ddah2         | -0.506 | 0     | 0.169 | 7.53E-06    | 29 |
| Iigp1         | -0.295 | 1     | 0.084 | 1.72E-05    | 29 |
| Rgs1          | -0.620 | 0.857 | 0.06  | 2.14E-05    | 29 |
| Ifrd1         | 0.635  | 1     | 0.096 | 2.26E-05    | 29 |
| Glipr1        | -0.269 | 0.143 | 0.048 | 4.62E-05    | 29 |
| Foxq1         | 0.346  | 1     | 0.096 | 5.08E-05    | 29 |
| Igkc          | -0.649 | 1     | 0.096 | 0.000112016 | 29 |
| Myc           | -0.258 | 0.143 | 0.06  | 0.000128991 | 29 |
| Ncf2          | -0.267 | 0.714 | 0.048 | 0.000236996 | 29 |
| Vsig1         | 0.384  | 1     | 0.108 | 0.000245164 | 29 |
| Nupr1         | -0.282 | 0.857 | 0.036 | 0.000360403 | 29 |
| Agl           | -0.280 | 1     | 0.108 | 0.000575291 | 29 |
| Me1           | -0.288 | 1     | 0.108 | 0.000575291 | 29 |
| Trp53inp1     | -0.308 | 1     | 0.108 | 0.000575291 | 29 |
| Cym           | -0.347 | 1     | 0.108 | 0.000575291 | 29 |
| H2-DMA        | -0.390 | 1     | 0.108 | 0.000575291 | 29 |
| Spink4        | -0.888 | 1     | 0.108 | 0.000575291 | 29 |
| H1fx          | -0.433 | 0.143 | 0.084 | 0.000640109 | 29 |
| Ccdc34        | -0.301 | 0.143 | 0.108 | 0.002092749 | 29 |
| Hba-a1        | -0.326 | 0.571 | 0.036 | 0.002681745 | 29 |
| Bmp2          | 0.294  | 1     | 0.145 | 0.003284427 | 29 |
| Hspa1b        | 0.429  | 1     | 0.145 | 0.008326246 | 29 |
| Igsf5         | -0.303 | 1     | 0.133 | 0.008720993 | 29 |
| Muc6          | -1.145 | 1     | 0.133 | 0.008720993 | 29 |
| Atf3          | -0.718 | 0.143 | 0.157 | 0.010492436 | 29 |
| Parm1         | -0.276 | 0.857 | 0.06  | 0.012759947 | 29 |

|           |        |       |       |             |    |
|-----------|--------|-------|-------|-------------|----|
| Hbegf     | -0.455 | 0.143 | 0.169 | 0.014120847 | 29 |
| Slbp      | -0.261 | 1     | 0.145 | 0.02247101  | 29 |
| Gif       | -0.386 | 1     | 0.145 | 0.027266264 | 29 |
| Ly6a      | -0.522 | 1     | 0.145 | 0.027266264 | 29 |
| Cotl1     | -0.330 | 1     | 0.157 | 0.052740845 | 29 |
| Gkn3      | -0.380 | 1     | 0.157 | 0.075798586 | 29 |
| Irf1      | -0.494 | 1     | 0.157 | 0.075798586 | 29 |
| Hmgn2     | -0.793 | 0.143 | 0.277 | 0.078271777 | 29 |
| Chia1     | 0.588  | 1     | 0.193 | 0.111830572 | 29 |
| Ptgs2     | -0.331 | 0.571 | 0.06  | 0.130181386 | 29 |
| Cdkn1c    | -1.256 | 0.143 | 0.361 | 0.191530794 | 29 |
| AY036118  | 2.207  | 1     | 0.229 | 0.194932075 | 29 |
| Igtp      | -0.297 | 1     | 0.181 | 0.37436104  | 29 |
| Bpifb1    | -0.563 | 1     | 0.181 | 0.37436104  | 29 |
| Ghrl      | 0.655  | 1     | 0.241 | 0.43357924  | 29 |
| Cebpb     | -0.472 | 1     | 0.181 | 0.438453851 | 29 |
| Hes1      | -0.510 | 0.857 | 0.096 | 0.447870437 | 29 |
| Lgals3    | -0.284 | 0.571 | 0.072 | 0.507195191 | 29 |
| Tgm2      | 0.348  | 0.286 | 0.024 | 0.532113738 | 29 |
| Hamp2     | -0.371 | 0.714 | 0.012 | 0.563029632 | 29 |
| Fabp5     | -0.348 | 1     | 0.193 | 0.868415494 | 29 |
| AW112010  | -0.481 | 1     | 0.193 | 0.935017113 | 29 |
| Oxct1     | 0.395  | 1     | 0.217 | 1           | 29 |
| Hap1      | 0.527  | 1     | 0.253 | 1           | 29 |
| Hotairm1  | -0.615 | 0.714 | 0.12  | 1           | 29 |
| Nfe2l2    | -0.366 | 1     | 0.205 | 1           | 29 |
| Cd44      | -0.357 | 1     | 0.205 | 1           | 29 |
| Ifitm3    | -0.530 | 1     | 0.205 | 1           | 29 |
| S100a6    | -0.731 | 1     | 0.205 | 1           | 29 |
| Flvcr2    | -0.368 | 0.286 | 0.084 | 1           | 29 |
| Fam46c    | 0.315  | 0.286 | 0.072 | 1           | 29 |
| Snhg18    | -0.375 | 0.286 | 0.108 | 1           | 29 |
| Hgfac     | -0.316 | 0.286 | 0.108 | 1           | 29 |
| Agr2      | -0.542 | 1     | 0.217 | 1           | 29 |
| Stmn1     | -0.297 | 0.286 | 0.169 | 1           | 29 |
| Prr15     | 0.309  | 0.286 | 0.096 | 1           | 29 |
| Clic6     | -0.483 | 0.286 | 0.205 | 1           | 29 |
| Tkt       | -0.321 | 0.286 | 0.181 | 1           | 29 |
| Esd       | -0.679 | 0.286 | 0.265 | 1           | 29 |
| Sult1c2   | -0.432 | 0.286 | 0.193 | 1           | 29 |
| Gsr       | 0.262  | 1     | 0.277 | 1           | 29 |
| Sdcbp2    | -0.330 | 0.286 | 0.169 | 1           | 29 |
| Bmx       | 0.873  | 1     | 0.313 | 1           | 29 |
| Bst2      | -0.340 | 0.286 | 0.169 | 1           | 29 |
| Serpinb1a | -0.390 | 1     | 0.241 | 1           | 29 |
| Gipc2     | 0.728  | 1     | 0.325 | 1           | 29 |
| Id3       | -0.889 | 0.286 | 0.289 | 1           | 29 |
| Dgat2     | 0.398  | 0.714 | 0.048 | 1           | 29 |
| H2-Eb1    | -0.689 | 1     | 0.241 | 1           | 29 |
| Atp4b     | 0.569  | 0.714 | 0.06  | 1           | 29 |

|               |        |       |       |   |    |
|---------------|--------|-------|-------|---|----|
| Sprrr2a3      | -1.131 | 1     | 0.253 | 1 | 29 |
| Creb3l4       | 0.291  | 0.714 | 0.06  | 1 | 29 |
| Ano7          | 0.326  | 1     | 0.398 | 1 | 29 |
| Kcnk3         | -0.272 | 0.286 | 0.036 | 1 | 29 |
| Mgst2         | -0.315 | 1     | 0.265 | 1 | 29 |
| Hmgb2         | -0.712 | 1     | 0.265 | 1 | 29 |
| Sema7a        | 0.303  | 0.714 | 0.072 | 1 | 29 |
| Zfp428        | 0.560  | 1     | 0.482 | 1 | 29 |
| Cyba          | -0.309 | 1     | 0.277 | 1 | 29 |
| Ptgs1         | 0.341  | 1     | 0.361 | 1 | 29 |
| Plek          | -0.250 | 0.286 | 0.048 | 1 | 29 |
| Fabp1         | -0.748 | 0.286 | 0.205 | 1 | 29 |
| Rpl9-ps6      | 0.719  | 0.857 | 0.277 | 1 | 29 |
| Spib          | 0.605  | 1     | 0.542 | 1 | 29 |
| 1810010D01Rik | -0.514 | 0.714 | 0.084 | 1 | 29 |
| Ly6e          | -0.509 | 1     | 0.301 | 1 | 29 |
| Neb1          | 0.486  | 1     | 0.458 | 1 | 29 |
| Gstm1         | -0.336 | 0.857 | 0.205 | 1 | 29 |
| Ucp2          | 0.588  | 1     | 0.627 | 1 | 29 |
| Phgr1         | -0.250 | 0.571 | 0.036 | 1 | 29 |
| Mt2           | 1.083  | 0.714 | 0.108 | 1 | 29 |
| Lgals2        | -0.326 | 0.857 | 0.217 | 1 | 29 |
| Sh2d7         | 0.319  | 1     | 0.518 | 1 | 29 |
| AA467197      | -1.092 | 0.429 | 0.289 | 1 | 29 |
| Avil          | 0.466  | 1     | 0.747 | 1 | 29 |
| Krt19         | -0.662 | 0.857 | 0.217 | 1 | 29 |
| Dusp1         | -0.530 | 0.429 | 0.253 | 1 | 29 |
| Rps15         | -1.124 | 1     | 0.771 | 1 | 29 |
| Pik3r5        | 0.427  | 1     | 0.639 | 1 | 29 |
| Pla2g1b       | -0.266 | 1     | 0.446 | 1 | 29 |
| Mt1           | -0.514 | 0.429 | 0.398 | 1 | 29 |
| Gm11361       | -0.448 | 0.429 | 0.277 | 1 | 29 |
| Tspan6        | 0.668  | 1     | 0.506 | 1 | 29 |
| Gclc          | -0.745 | 0.857 | 0.229 | 1 | 29 |
| Ly6g6f        | 0.359  | 1     | 0.639 | 1 | 29 |
| H2-Ab1        | -0.487 | 1     | 0.325 | 1 | 29 |
| Prnp          | -0.437 | 0.429 | 0.181 | 1 | 29 |
| Id1           | -0.412 | 0.429 | 0.289 | 1 | 29 |
| Trpm5         | 0.402  | 1     | 0.675 | 1 | 29 |
| Clps          | -0.368 | 1     | 0.482 | 1 | 29 |
| Mxd1          | -0.255 | 0.429 | 0.169 | 1 | 29 |
| Gpx2          | -0.405 | 1     | 0.361 | 1 | 29 |
| Mgst3         | -1.077 | 0.714 | 0.614 | 1 | 29 |
| Idi1          | -0.833 | 0.857 | 0.241 | 1 | 29 |
| Lgals4        | 0.353  | 0.714 | 0.169 | 1 | 29 |
| Clic1         | -0.587 | 0.571 | 0.578 | 1 | 29 |
| Gkn2          | -0.335 | 1     | 0.41  | 1 | 29 |
| Ethe1         | -0.657 | 0.571 | 0.566 | 1 | 29 |
| Pgc           | -0.632 | 1     | 0.422 | 1 | 29 |
| 1810046K07Rik | 0.351  | 1     | 0.446 | 1 | 29 |

|               |        |       |       |   |    |
|---------------|--------|-------|-------|---|----|
| Alox5ap       | 0.549  | 1     | 0.747 | 1 | 29 |
| Car2          | -0.829 | 0.714 | 0.639 | 1 | 29 |
| Smpd3         | -0.696 | 1     | 0.349 | 1 | 29 |
| Hepacam2      | 0.352  | 1     | 0.53  | 1 | 29 |
| Lars2         | 1.084  | 0.714 | 0.253 | 1 | 29 |
| Nrgn          | 0.251  | 1     | 0.458 | 1 | 29 |
| H2-K1         | 0.463  | 1     | 0.807 | 1 | 29 |
| Malat1        | -1.117 | 1     | 0.988 | 1 | 29 |
| Clu           | -0.338 | 1     | 0.434 | 1 | 29 |
| Gnat3         | -0.335 | 0.857 | 0.289 | 1 | 29 |
| Gsta4         | -0.682 | 0.571 | 0.434 | 1 | 29 |
| Gm26917       | -1.764 | 0.571 | 0.47  | 1 | 29 |
| Pcolce2       | 0.430  | 0.286 | 0.084 | 1 | 29 |
| Usp50         | -0.416 | 0.714 | 0.145 | 1 | 29 |
| Gm11808       | -0.724 | 1     | 0.361 | 1 | 29 |
| Lgr4          | 0.432  | 0.429 | 0.12  | 1 | 29 |
| Tff2          | -1.275 | 1     | 0.386 | 1 | 29 |
| Oasl1         | 0.251  | 0.429 | 0.036 | 1 | 29 |
| Ifi2712b      | 0.828  | 0.429 | 0.072 | 1 | 29 |
| Myo15b        | 0.465  | 1     | 0.458 | 1 | 29 |
| Cela1         | 0.303  | 0.429 | 0.024 | 1 | 29 |
| Gadd45g       | -0.335 | 0.857 | 0.301 | 1 | 29 |
| Tuba1a        | 0.623  | 1     | 0.59  | 1 | 29 |
| Plac8         | -0.637 | 1     | 0.843 | 1 | 29 |
| Chil1         | 0.497  | 0.429 | 0.06  | 1 | 29 |
| Furin         | -0.431 | 0.714 | 0.157 | 1 | 29 |
| Irf7          | 0.692  | 0.714 | 0.253 | 1 | 29 |
| Ptpn18        | 0.663  | 1     | 0.867 | 1 | 29 |
| Tmem158       | 0.354  | 0.714 | 0.265 | 1 | 29 |
| Abhd2         | -0.332 | 1     | 0.494 | 1 | 29 |
| Gstp1         | 0.292  | 0.714 | 0.229 | 1 | 29 |
| Spdef         | 0.542  | 0.429 | 0.133 | 1 | 29 |
| H2afz         | -0.600 | 0.857 | 0.627 | 1 | 29 |
| 4930539E08Rik | 0.328  | 0.714 | 0.217 | 1 | 29 |
| Phlda1        | 0.553  | 0.857 | 0.422 | 1 | 29 |
| Cd74          | -0.962 | 1     | 0.434 | 1 | 29 |
| Tpm1          | 0.413  | 0.857 | 0.422 | 1 | 29 |
| Hmgcs1        | -0.402 | 1     | 0.482 | 1 | 29 |
| Rpl23a        | -0.622 | 1     | 0.699 | 1 | 29 |
| Ms4a8a        | 0.274  | 0.714 | 0.253 | 1 | 29 |
| Csrp1         | -0.347 | 0.714 | 0.193 | 1 | 29 |
| Rps2          | -1.223 | 1     | 0.663 | 1 | 29 |
| Ppp2r1b       | -0.256 | 0.571 | 0.036 | 1 | 29 |
| mt-Nd3        | -1.109 | 1     | 0.614 | 1 | 29 |
| Atp5k         | -0.440 | 1     | 0.723 | 1 | 29 |
| Nfkbia        | -0.368 | 0.571 | 0.313 | 1 | 29 |
| Rpl17         | -0.665 | 1     | 0.723 | 1 | 29 |
| Prr13         | -0.360 | 0.714 | 0.47  | 1 | 29 |
| Psca          | -0.481 | 0.571 | 0.277 | 1 | 29 |
| S100a11       | -0.824 | 1     | 0.614 | 1 | 29 |

|               |        |       |       |             |    |
|---------------|--------|-------|-------|-------------|----|
| 2200002D01Rik | -0.429 | 0.857 | 0.398 | 1           | 29 |
| Krt7          | -0.269 | 0.714 | 0.229 | 1           | 29 |
| Prdx1         | -0.544 | 1     | 0.518 | 1           | 29 |
| Tff1          | -0.931 | 1     | 0.711 | 1           | 29 |
| Pou2f3        | 0.490  | 0.571 | 0.434 | 1           | 29 |
| Ckmt1         | -0.344 | 0.857 | 0.434 | 1           | 29 |
| Pate4         | -1.001 | 0.571 | 0.193 | 1           | 29 |
| Mfge8         | -0.277 | 0.571 | 0.084 | 1           | 29 |
| Insig1        | -0.444 | 0.714 | 0.325 | 1           | 29 |
| Gm8113        | -0.311 | 0.143 | 0.096 | 1           | 29 |
| 2210407C18Rik | -0.304 | 0.571 | 0.193 | 1           | 29 |
| Strip2        | -0.669 | 0.714 | 0.47  | 1           | 29 |
| Limd2         | -0.683 | 0.857 | 0.47  | 1           | 29 |
| Apobec1       | -0.295 | 0.286 | 0.096 | 1           | 29 |
| Crip1         | -0.271 | 1     | 0.892 | 1           | 29 |
| Hck           | 0.341  | 1     | 0.687 | 1           | 29 |
| Siglecf       | -0.345 | 0.571 | 0.325 | 1           | 29 |
| Cyr61         | -0.375 | 0.571 | 0.096 | 1           | 29 |
| Cdkn1a        | -0.380 | 0.857 | 0.518 | 1           | 29 |
| Chka          | 0.730  | 0.571 | 0.169 | 1           | 29 |
| Neat1         | -0.494 | 1     | 0.807 | 1           | 29 |
| Gkn1          | -0.490 | 0.714 | 0.506 | 1           | 29 |
| Matk          | -0.987 | 0.857 | 0.566 | 1           | 29 |
| Degs2         | 0.397  | 0.571 | 0.181 | 1           | 29 |
| Il21r         | 0.267  | 1     | 0.024 | 1.11E-06    | 30 |
| Epsti1        | 0.251  | 1     | 0.024 | 1.11E-06    | 30 |
| Igkv19-93     | -0.438 | 1     | 0.024 | 1.11E-06    | 30 |
| Igkv4-80      | -2.796 | 1     | 0.024 | 1.11E-06    | 30 |
| Igkv8-21      | -3.671 | 1     | 0.036 | 0.000107367 | 30 |
| Gm8369        | 0.265  | 1     | 0.048 | 0.002299152 | 30 |
| Pclaf         | -0.295 | 1     | 0.048 | 0.002299152 | 30 |
| Pgd           | -0.293 | 1     | 0.06  | 0.020775864 | 30 |
| Gpx2          | -0.470 | 1     | 0.06  | 0.020775864 | 30 |
| Isg15         | -0.470 | 1     | 0.06  | 0.020775864 | 30 |
| Lypd8         | -0.477 | 1     | 0.06  | 0.020775864 | 30 |
| Bpifb1        | -0.520 | 1     | 0.06  | 0.020775864 | 30 |
| Ighv1-14      | -3.134 | 1     | 0.06  | 0.020775864 | 30 |
| Vim           | -0.697 | 0     | 0.108 | 0.082303805 | 30 |
| Rflnb         | -0.286 | 1     | 0.072 | 0.109311796 | 30 |
| Oit1          | -0.413 | 1     | 0.072 | 0.109311796 | 30 |
| Hamp2         | -0.267 | 1     | 0.084 | 0.400604047 | 30 |
| Mllt3         | -0.334 | 1     | 0.084 | 0.400604047 | 30 |
| Ifrd1         | -0.323 | 0     | 0.145 | 0.426181938 | 30 |
| Pcna          | -0.393 | 0     | 0.145 | 0.426181938 | 30 |
| Phlda1        | -0.592 | 0     | 0.145 | 0.426181938 | 30 |
| Clu           | -0.902 | 0     | 0.145 | 0.426181938 | 30 |
| S100a6        | -0.988 | 0     | 0.169 | 0.905697319 | 30 |
| Abhd2         | -0.269 | 1     | 0.096 | 1           | 30 |
| Gsta4         | -0.330 | 1     | 0.096 | 1           | 30 |
| Klf4          | -0.388 | 1     | 0.096 | 1           | 30 |

|               |        |     |       |   |    |
|---------------|--------|-----|-------|---|----|
| Ighj2         | -0.399 | 1   | 0.096 | 1 | 30 |
| Muc6          | -0.410 | 1   | 0.096 | 1 | 30 |
| Ighv5-4       | -3.886 | 1   | 0.096 | 1 | 30 |
| Krt8          | -1.320 | 1   | 0.108 | 1 | 30 |
| Far1          | -0.296 | 1   | 0.12  | 1 | 30 |
| Krt19         | -0.649 | 1   | 0.12  | 1 | 30 |
| Cym           | -0.841 | 1   | 0.12  | 1 | 30 |
| Ifi203        | 0.300  | 1   | 0.145 | 1 | 30 |
| Gif           | -0.475 | 1   | 0.133 | 1 | 30 |
| Apoa1         | -0.581 | 1   | 0.133 | 1 | 30 |
| Mgst3         | -0.866 | 1   | 0.133 | 1 | 30 |
| Gem           | 0.813  | 1   | 0.181 | 1 | 30 |
| Hist1h2ap     | -0.370 | 1   | 0.145 | 1 | 30 |
| Tkt           | -0.373 | 1   | 0.145 | 1 | 30 |
| Ighg3         | -3.078 | 0.5 | 0.048 | 1 | 30 |
| Hmgb2         | -0.359 | 1   | 0.157 | 1 | 30 |
| Hist1h2bc     | -0.281 | 1   | 0.169 | 1 | 30 |
| Gm26825       | -0.306 | 1   | 0.169 | 1 | 30 |
| Ighg2b        | -1.659 | 1   | 0.169 | 1 | 30 |
| Kctd12        | -0.253 | 1   | 0.181 | 1 | 30 |
| Atp2a3        | -0.490 | 1   | 0.181 | 1 | 30 |
| Selplg        | 0.467  | 1   | 0.325 | 1 | 30 |
| Tnfrsf13c     | -0.325 | 1   | 0.193 | 1 | 30 |
| Hist2h2aa1    | -0.349 | 1   | 0.193 | 1 | 30 |
| Ctse          | -0.652 | 1   | 0.205 | 1 | 30 |
| Car2          | -0.658 | 1   | 0.205 | 1 | 30 |
| H2-T23        | -0.377 | 1   | 0.217 | 1 | 30 |
| 2210407C18Rik | -1.606 | 1   | 0.217 | 1 | 30 |
| Ly6d          | 1.381  | 1   | 0.386 | 1 | 30 |
| Tubb5         | -0.346 | 1   | 0.229 | 1 | 30 |
| Rgs10         | 0.272  | 1   | 0.301 | 1 | 30 |
| Dusp1         | 0.941  | 1   | 0.386 | 1 | 30 |
| Capg          | 0.434  | 1   | 0.386 | 1 | 30 |
| Hspa1b        | -0.917 | 1   | 0.253 | 1 | 30 |
| Psca          | -0.993 | 1   | 0.253 | 1 | 30 |
| Psmb8         | 0.826  | 1   | 0.602 | 1 | 30 |
| Nfkbia        | 0.369  | 1   | 0.542 | 1 | 30 |
| Cd79b         | 0.321  | 1   | 0.446 | 1 | 30 |
| H2-Aa         | -0.275 | 1   | 0.301 | 1 | 30 |
| Gstp1         | -0.449 | 1   | 0.265 | 1 | 30 |
| Crip1         | 0.507  | 1   | 0.578 | 1 | 30 |
| Cd74          | 0.548  | 1   | 0.904 | 1 | 30 |
| Zfp36         | 0.387  | 1   | 0.554 | 1 | 30 |
| Ctss          | 0.323  | 1   | 0.434 | 1 | 30 |
| Iglc1         | -2.328 | 1   | 0.458 | 1 | 30 |
| Ly6a          | 0.442  | 1   | 0.506 | 1 | 30 |
| Ghrl          | -0.950 | 1   | 0.301 | 1 | 30 |
| Jchain        | 0.333  | 1   | 1     | 1 | 30 |
| Trbc2         | -0.275 | 1   | 0.313 | 1 | 30 |
| Gkn1          | -2.260 | 0.5 | 0.398 | 1 | 30 |

|           |        |     |       |   |    |
|-----------|--------|-----|-------|---|----|
| Gm26917   | -1.260 | 0.5 | 0.386 | 1 | 30 |
| H2-Ab1    | 0.417  | 1   | 0.566 | 1 | 30 |
| Tnfrsf17  | -0.477 | 0.5 | 0.422 | 1 | 30 |
| Trbv1     | -1.301 | 1   | 0.325 | 1 | 30 |
| Iglc2     | 0.490  | 1   | 0.867 | 1 | 30 |
| Tff2      | -1.153 | 0.5 | 0.337 | 1 | 30 |
| Iglc3     | 1.108  | 1   | 0.711 | 1 | 30 |
| Hspa1a    | -1.209 | 0.5 | 0.325 | 1 | 30 |
| Gm11808   | -0.298 | 1   | 0.337 | 1 | 30 |
| Iglv3     | 0.264  | 1   | 0.614 | 1 | 30 |
| Chia1     | -1.279 | 0.5 | 0.289 | 1 | 30 |
| Cybb      | -0.658 | 0.5 | 0.422 | 1 | 30 |
| Lars2     | -0.940 | 0.5 | 0.313 | 1 | 30 |
| Fkbp11    | -0.326 | 0.5 | 0.458 | 1 | 30 |
| Igha      | -2.117 | 1   | 0.675 | 1 | 30 |
| S100a11   | -0.495 | 0.5 | 0.265 | 1 | 30 |
| Cd28      | -0.505 | 0.5 | 0.193 | 1 | 30 |
| Agr2      | -0.951 | 0.5 | 0.217 | 1 | 30 |
| Basp1     | -0.546 | 0.5 | 0.229 | 1 | 30 |
| Trp53inp1 | -0.951 | 1   | 0.723 | 1 | 30 |
| Sprr2a3   | -1.331 | 0.5 | 0.277 | 1 | 30 |
| Ikzf3     | -0.290 | 0.5 | 0.181 | 1 | 30 |
| Ucp2      | -0.524 | 1   | 0.434 | 1 | 30 |
| Dnajb1    | -0.423 | 0.5 | 0.446 | 1 | 30 |
| Gm30211   | -0.400 | 1   | 0.47  | 1 | 30 |
| Msn       | -0.267 | 0.5 | 0.169 | 1 | 30 |
| Rhoh      | -0.318 | 0.5 | 0.169 | 1 | 30 |
| Atp4b     | -0.415 | 0.5 | 0.169 | 1 | 30 |
| Tubb4b    | -0.450 | 0.5 | 0.169 | 1 | 30 |
| Gkn2      | -1.442 | 0.5 | 0.241 | 1 | 30 |
| Laptm5    | -0.407 | 0.5 | 0.157 | 1 | 30 |
| Cks1b     | -0.408 | 0.5 | 0.157 | 1 | 30 |
| Tagln2    | -0.300 | 0.5 | 0.205 | 1 | 30 |
| Mki67     | -0.277 | 0   | 0.12  | 1 | 30 |
| Cd69      | -0.576 | 1   | 0.47  | 1 | 30 |
| AY036118  | -2.093 | 1   | 0.41  | 1 | 30 |
| Rpl9-ps6  | -1.107 | 1   | 0.422 | 1 | 30 |
| Neat1     | -0.399 | 1   | 0.614 | 1 | 30 |
| Serpina3f | -0.272 | 0   | 0.108 | 1 | 30 |
| Ighv5-6   | -1.117 | 0   | 0.108 | 1 | 30 |
| Zfp36l2   | -0.361 | 0.5 | 0.12  | 1 | 30 |
| Mef2c     | -0.403 | 1   | 0.542 | 1 | 30 |
| Igkj2     | -0.394 | 0.5 | 0.12  | 1 | 30 |
| Rpl17     | -0.426 | 1   | 0.783 | 1 | 30 |
| mt-Nd3    | -0.339 | 1   | 0.458 | 1 | 30 |
| Anxa10    | -0.613 | 0.5 | 0.096 | 1 | 30 |
| Gm42418   | -2.887 | 1   | 0.627 | 1 | 30 |
| Ly6c2     | -0.406 | 1   | 0.892 | 1 | 30 |
| Tigit     | -0.308 | 0.5 | 0.084 | 1 | 30 |
| Iglv1     | -0.735 | 1   | 0.831 | 1 | 30 |

|            |        |       |       |             |    |
|------------|--------|-------|-------|-------------|----|
| Glipr1     | -0.553 | 1     | 0.494 | 1           | 30 |
| Lgals1     | -0.460 | 1     | 0.506 | 1           | 30 |
| Igkv1-135  | -1.600 | 0.5   | 0.072 | 1           | 30 |
| Apobec1    | -0.292 | 0.5   | 0.06  | 1           | 30 |
| Ighj4      | -1.142 | 0.5   | 0.06  | 1           | 30 |
| Igkv16-104 | -2.520 | 0.5   | 0.06  | 1           | 30 |
| Igkv10-96  | -4.342 | 0.5   | 0.06  | 1           | 30 |
| Emp3       | -0.376 | 1     | 0.458 | 1           | 30 |
| Ly6c1      | -1.318 | 1     | 0.566 | 1           | 30 |
| Trbc1      | -1.042 | 1     | 0.59  | 1           | 30 |
| Pga5       | -0.280 | 0.5   | 0.048 | 1           | 30 |
| Igkv5-48   | -4.433 | 0.5   | 0.048 | 1           | 30 |
| Clps       | -2.746 | 1     | 0.554 | 1           | 30 |
| Slpi       | -1.572 | 1     | 0.819 | 1           | 30 |
| Malat1     | -0.590 | 1     | 0.928 | 1           | 30 |
| Atp5k      | -0.289 | 1     | 0.518 | 1           | 30 |
| Eaf2       | -0.500 | 1     | 0.53  | 1           | 30 |
| Pgc        | -2.480 | 1     | 0.542 | 1           | 30 |
| Pla2g1b    | -2.484 | 1     | 0.542 | 1           | 30 |
| Tmsb10     | -0.296 | 1     | 0.675 | 1           | 30 |
| Cd83       | 0.488  | 0.5   | 0.096 | 1           | 30 |
| Dpcr1      | -0.457 | 0.5   | 0.036 | 1           | 30 |
| Smc4       | 0.317  | 0.5   | 0.133 | 1           | 30 |
| Gm26532    | 0.521  | 0.5   | 0.145 | 1           | 30 |
| Actb       | -0.344 | 1     | 0.795 | 1           | 30 |
| Smpd3      | -0.297 | 0.5   | 0.024 | 1           | 30 |
| Nme2       | -0.824 | 1     | 0.518 | 1           | 30 |
| Derl3      | -0.520 | 1     | 0.53  | 1           | 30 |
| Maged2     | 0.250  | 0.5   | 0.036 | 1           | 30 |
| Tff1       | -2.454 | 1     | 0.554 | 1           | 30 |
| Creld2     | -0.331 | 1     | 0.735 | 1           | 30 |
| Cd52       | -0.416 | 1     | 0.831 | 1           | 30 |
| Hist1h1b   | 0.533  | 0.5   | 0.048 | 1           | 30 |
| Rpl23a     | -0.392 | 1     | 0.639 | 1           | 30 |
| Igkv10-94  | 3.918  | 0.5   | 0.036 | 1           | 30 |
| C2         | 0.424  | 0.5   | 0.024 | 1           | 30 |
| Srgn       | -0.316 | 1     | 0.663 | 1           | 30 |
| Sncg       | -2.234 | 0     | 0.5   | 8.45E-07    | 31 |
| Aspn       | -2.234 | 0     | 0.5   | 8.45E-07    | 31 |
| Mmp12      | -2.234 | 0     | 0.5   | 8.45E-07    | 31 |
| Higd1b     | -2.234 | 0     | 0.5   | 8.45E-07    | 31 |
| Nrip2      | -2.234 | 0     | 0.5   | 8.45E-07    | 31 |
| Plau       | -2.156 | 0.025 | 0.5   | 0.747291091 | 31 |
| H2-K1      | 2.489  | 1     | 0     | 1           | 31 |
| Sprr2a3    | 2.349  | 1     | 0     | 1           | 31 |
| Gsta4      | 2.098  | 1     | 0     | 1           | 31 |
| S100a11    | 1.926  | 1     | 0     | 1           | 31 |
| Bpifb1     | 1.904  | 1     | 0     | 1           | 31 |
| H2-Ab1     | 1.583  | 1     | 0     | 1           | 31 |
| Neat1      | 1.549  | 1     | 0     | 1           | 31 |



|          |       |   |   |   |    |
|----------|-------|---|---|---|----|
| Psemb8   | 1.512 | 1 | 0 | 1 | 31 |
| Rpl17    | 1.508 | 1 | 0 | 1 | 31 |
| Lypd8    | 1.382 | 1 | 0 | 1 | 31 |
| Klf4     | 1.335 | 1 | 0 | 1 | 31 |
| Tkt      | 1.286 | 1 | 0 | 1 | 31 |
| Ctse     | 1.219 | 1 | 0 | 1 | 31 |
| Gm26917  | 1.180 | 1 | 0 | 1 | 31 |
| Ly6e     | 1.099 | 1 | 0 | 1 | 31 |
| Ugdh     | 1.074 | 1 | 0 | 1 | 31 |
| Pga5     | 1.047 | 1 | 0 | 1 | 31 |
| H2-DMa   | 1.030 | 1 | 0 | 1 | 31 |
| Gfpt1    | 0.999 | 1 | 0 | 1 | 31 |
| Me1      | 0.961 | 1 | 0 | 1 | 31 |
| mt-Nd3   | 0.846 | 1 | 0 | 1 | 31 |
| Ppp1r3a  | 0.762 | 1 | 0 | 1 | 31 |
| Arl6ip1  | 0.755 | 1 | 0 | 1 | 31 |
| Plac8    | 0.734 | 1 | 0 | 1 | 31 |
| Rflnb    | 0.734 | 1 | 0 | 1 | 31 |
| Cotl1    | 0.709 | 1 | 0 | 1 | 31 |
| Tubb5    | 0.704 | 1 | 0 | 1 | 31 |
| Isg15    | 0.697 | 1 | 0 | 1 | 31 |
| Mfge8    | 0.659 | 1 | 0 | 1 | 31 |
| Gbp2     | 0.636 | 1 | 0 | 1 | 31 |
| Ndrp1    | 0.577 | 1 | 0 | 1 | 31 |
| Gstp2    | 0.558 | 1 | 0 | 1 | 31 |
| Tmem176a | 0.557 | 1 | 0 | 1 | 31 |
| Cks1b    | 0.539 | 1 | 0 | 1 | 31 |
| Dusp5    | 0.531 | 1 | 0 | 1 | 31 |
| Cel      | 0.530 | 1 | 0 | 1 | 31 |
| Lgmn     | 0.517 | 1 | 0 | 1 | 31 |
| Vtn      | 0.511 | 1 | 0 | 1 | 31 |
| Dut      | 0.504 | 1 | 0 | 1 | 31 |
| Spink4   | 0.504 | 1 | 0 | 1 | 31 |
| Sox9     | 0.497 | 1 | 0 | 1 | 31 |
| Serpinb9 | 0.496 | 1 | 0 | 1 | 31 |
| Vars2    | 0.485 | 1 | 0 | 1 | 31 |
| Cks2     | 0.475 | 1 | 0 | 1 | 31 |
| Il2rg    | 0.473 | 1 | 0 | 1 | 31 |
| Irf7     | 0.472 | 1 | 0 | 1 | 31 |
| Ano7     | 0.461 | 1 | 0 | 1 | 31 |
| Rgs1     | 0.457 | 1 | 0 | 1 | 31 |
| Ms4a6c   | 0.456 | 1 | 0 | 1 | 31 |
| Arl14    | 0.452 | 1 | 0 | 1 | 31 |
| Gclc     | 0.436 | 1 | 0 | 1 | 31 |
| Hmgb2    | 0.425 | 1 | 0 | 1 | 31 |
| Gldc     | 0.423 | 1 | 0 | 1 | 31 |
| Timp3    | 0.417 | 1 | 0 | 1 | 31 |
| Msmo1    | 0.412 | 1 | 0 | 1 | 31 |
| Wars     | 0.408 | 1 | 0 | 1 | 31 |
| Tmem54   | 0.407 | 1 | 0 | 1 | 31 |

|               |        |       |     |   |    |
|---------------|--------|-------|-----|---|----|
| Pgd           | 0.388  | 1     | 0   | 1 | 31 |
| 2200002D01Rik | 0.384  | 1     | 0   | 1 | 31 |
| Ets1          | 0.381  | 1     | 0   | 1 | 31 |
| Igha          | 0.379  | 1     | 0   | 1 | 31 |
| Snhg18        | 0.376  | 1     | 0   | 1 | 31 |
| Rnase1        | 0.364  | 1     | 0   | 1 | 31 |
| Gcnt3         | 0.338  | 1     | 0   | 1 | 31 |
| Hbb-bs        | 0.330  | 1     | 0   | 1 | 31 |
| Ddit4         | 0.324  | 1     | 0   | 1 | 31 |
| Rac2          | 0.314  | 1     | 0   | 1 | 31 |
| Iigp1         | 0.312  | 1     | 0   | 1 | 31 |
| Ptprc         | 0.309  | 1     | 0   | 1 | 31 |
| Esrrg         | 0.299  | 1     | 0   | 1 | 31 |
| A4gnt         | 0.290  | 1     | 0   | 1 | 31 |
| Plaur         | 0.287  | 1     | 0   | 1 | 31 |
| Hamp          | 0.279  | 1     | 0   | 1 | 31 |
| Dqx1          | 0.268  | 1     | 0   | 1 | 31 |
| Ubd           | 0.258  | 1     | 0   | 1 | 31 |
| Tpm1          | -1.675 | 0.875 | 1   | 1 | 31 |
| Oxct1         | -1.764 | 0.75  | 1   | 1 | 31 |
| Atp5k         | -2.195 | 1     | 1   | 1 | 31 |
| Gkn1          | 2.460  | 1     | 0.5 | 1 | 31 |
| Chia1         | 2.840  | 0.988 | 0   | 1 | 31 |
| Mt1           | 2.424  | 0.988 | 0   | 1 | 31 |
| Gsto1         | 1.245  | 0.988 | 0   | 1 | 31 |
| Oit1          | 1.050  | 0.988 | 0   | 1 | 31 |
| Nfkbia        | 0.963  | 0.988 | 0   | 1 | 31 |
| Ptgr1         | 0.917  | 0.988 | 0   | 1 | 31 |
| Id1           | 0.396  | 0.988 | 0   | 1 | 31 |
| Pdlim1        | 0.337  | 0.988 | 0   | 1 | 31 |
| Ube2s         | 0.321  | 0.988 | 0   | 1 | 31 |
| Gsdmc2        | 0.308  | 0.988 | 0   | 1 | 31 |
| Gjb1          | 0.265  | 0.988 | 0   | 1 | 31 |
| C2            | 0.256  | 0.988 | 0   | 1 | 31 |
| Agr2          | -1.296 | 1     | 1   | 1 | 31 |
| H2-Aa         | -1.486 | 1     | 1   | 1 | 31 |
| Cst3          | -1.746 | 0.8   | 1   | 1 | 31 |
| Muc5ac        | 2.190  | 0.975 | 0   | 1 | 31 |
| Rpl9-ps6      | 2.101  | 0.975 | 0   | 1 | 31 |
| Gstp1         | 1.650  | 0.975 | 0   | 1 | 31 |
| Ghrl          | -1.150 | 1     | 1   | 1 | 31 |
| Clic1         | -1.513 | 1     | 1   | 1 | 31 |
| Ehd3          | -2.233 | 0.075 | 0.5 | 1 | 31 |
| Nov           | -2.146 | 0.062 | 0.5 | 1 | 31 |
| Gng11         | -2.051 | 0.062 | 0.5 | 1 | 31 |
| Tff1          | 0.640  | 1     | 1   | 1 | 31 |
| Zfp36         | 1.315  | 0.95  | 0   | 1 | 31 |
| Ucp2          | 1.176  | 0.95  | 0   | 1 | 31 |
| Tst           | 0.491  | 0.95  | 0   | 1 | 31 |
| Lgals7        | 0.401  | 0.95  | 0   | 1 | 31 |

|               |        |       |     |   |    |
|---------------|--------|-------|-----|---|----|
| Pla2g1b       | 0.492  | 1     | 1   | 1 | 31 |
| Cfh           | -2.249 | 0.1   | 0.5 | 1 | 31 |
| Gsr           | 0.764  | 0.938 | 0   | 1 | 31 |
| Sdcbp2        | 0.302  | 0.938 | 0   | 1 | 31 |
| Pcna          | 0.264  | 0.938 | 0   | 1 | 31 |
| Pmm1          | 0.253  | 0.938 | 0   | 1 | 31 |
| S100a6        | -0.703 | 1     | 1   | 1 | 31 |
| Aqp4          | -2.089 | 0.125 | 0.5 | 1 | 31 |
| Insig1        | -2.177 | 0.125 | 0.5 | 1 | 31 |
| Dcn           | 1.219  | 0.925 | 0   | 1 | 31 |
| AY036118      | 1.904  | 1     | 1   | 1 | 31 |
| Mustn1        | -2.031 | 0.15  | 0.5 | 1 | 31 |
| Hmgcs1        | -2.065 | 0.15  | 0.5 | 1 | 31 |
| Lbh           | -1.966 | 0.162 | 0.5 | 1 | 31 |
| Lgals1        | 1.894  | 0.912 | 0   | 1 | 31 |
| Adh7          | 0.252  | 0.912 | 0   | 1 | 31 |
| Pmp22         | -1.899 | 0.175 | 0.5 | 1 | 31 |
| Spdef         | -2.037 | 0.175 | 0.5 | 1 | 31 |
| Ggh           | -2.088 | 0.188 | 0.5 | 1 | 31 |
| Cald1         | -2.000 | 0.212 | 0.5 | 1 | 31 |
| Mylk          | -1.967 | 0.15  | 0.5 | 1 | 31 |
| Creld2        | 0.303  | 0.112 | 0   | 1 | 31 |
| Pdlim3        | 0.279  | 0.112 | 0   | 1 | 31 |
| Rgs5          | -3.841 | 0.225 | 0.5 | 1 | 31 |
| Gm42418       | 0.642  | 1     | 1   | 1 | 31 |
| Krt8          | -0.623 | 1     | 1   | 1 | 31 |
| 1810010D01Rik | 0.845  | 0.875 | 0   | 1 | 31 |
| Kcne2         | -1.958 | 0.262 | 0.5 | 1 | 31 |
| Tgm2          | -1.961 | 0.262 | 0.5 | 1 | 31 |
| Cldn10        | 0.273  | 0.138 | 0   | 1 | 31 |
| Fabp4         | 0.263  | 0.138 | 0   | 1 | 31 |
| Rcn1          | 0.257  | 0.138 | 0   | 1 | 31 |
| Cd59a         | 0.333  | 0.15  | 0   | 1 | 31 |
| Barx1         | 0.301  | 0.15  | 0   | 1 | 31 |
| Gm10260       | 0.580  | 0.838 | 0   | 1 | 31 |
| Fdps          | 0.319  | 0.838 | 0   | 1 | 31 |
| Crip2         | 0.298  | 0.162 | 0   | 1 | 31 |
| Papss2        | -1.946 | 0.325 | 0.5 | 1 | 31 |
| Lrp3          | -2.233 | 0.112 | 0.5 | 1 | 31 |
| Serpinh1      | -1.724 | 0.338 | 0.5 | 1 | 31 |
| Cxcl17        | -1.930 | 0.338 | 0.5 | 1 | 31 |
| Fxyd1         | 0.614  | 0.15  | 0   | 1 | 31 |
| Mmp23         | 0.279  | 0.175 | 0   | 1 | 31 |
| Nr4a1         | 0.265  | 0.175 | 0   | 1 | 31 |
| Ccdc3         | 0.259  | 0.175 | 0   | 1 | 31 |
| Ckb           | 0.717  | 0.812 | 0   | 1 | 31 |
| Ier3          | 0.669  | 0.812 | 0   | 1 | 31 |
| Prnp          | 0.580  | 0.188 | 0   | 1 | 31 |
| Sparcl1       | 0.401  | 0.188 | 0   | 1 | 31 |
| Gm3336        | 0.308  | 0.188 | 0   | 1 | 31 |

|          |        |       |     |   |    |
|----------|--------|-------|-----|---|----|
| Cyp2s1   | 0.257  | 0.188 | 0   | 1 | 31 |
| Car2     | 1.410  | 0.8   | 0   | 1 | 31 |
| Furin    | 0.787  | 0.8   | 0   | 1 | 31 |
| Efemp1   | 0.306  | 0.2   | 0   | 1 | 31 |
| Lgals2   | 0.811  | 0.988 | 0.5 | 1 | 31 |
| Phlda1   | -2.022 | 0.412 | 0.5 | 1 | 31 |
| Anxa10   | 0.805  | 0.788 | 0   | 1 | 31 |
| Lgals9   | 0.683  | 0.788 | 0   | 1 | 31 |
| Cavin3   | 0.464  | 0.212 | 0   | 1 | 31 |
| Nrn1     | 0.346  | 0.212 | 0   | 1 | 31 |
| Ccdc80   | 0.261  | 0.212 | 0   | 1 | 31 |
| Fa2h     | 0.260  | 0.212 | 0   | 1 | 31 |
| Mgp      | 0.254  | 0.212 | 0   | 1 | 31 |
| Ctsl     | -1.681 | 0.438 | 0.5 | 1 | 31 |
| Tesc     | 0.628  | 0.775 | 0   | 1 | 31 |
| Nupr1    | 0.570  | 0.775 | 0   | 1 | 31 |
| Ethe1    | 0.392  | 0.775 | 0   | 1 | 31 |
| Sult1b1  | 0.263  | 0.225 | 0   | 1 | 31 |
| Clu      | -0.349 | 1     | 1   | 1 | 31 |
| Lars2    | -0.431 | 1     | 1   | 1 | 31 |
| Bst2     | -1.463 | 0.45  | 0.5 | 1 | 31 |
| Chga     | 0.899  | 0.762 | 0   | 1 | 31 |
| S100a10  | 0.633  | 0.238 | 0   | 1 | 31 |
| Lhfp     | 0.334  | 0.238 | 0   | 1 | 31 |
| Nbl1     | 0.331  | 0.238 | 0   | 1 | 31 |
| Igfbp3   | 0.289  | 0.238 | 0   | 1 | 31 |
| Lmo4     | 0.261  | 0.238 | 0   | 1 | 31 |
| Ccdc34   | 0.257  | 0.238 | 0   | 1 | 31 |
| Cavin1   | 0.256  | 0.238 | 0   | 1 | 31 |
| Ifrd1    | 0.251  | 0.762 | 0   | 1 | 31 |
| Pla2g10  | 0.251  | 0.238 | 0   | 1 | 31 |
| Gkn2     | 0.668  | 0.988 | 0.5 | 1 | 31 |
| Nfe2l2   | -1.668 | 0.488 | 0.5 | 1 | 31 |
| Mef2c    | -2.870 | 0.238 | 0.5 | 1 | 31 |
| Krt19    | 1.016  | 0.75  | 0   | 1 | 31 |
| Dusp1    | 0.997  | 0.75  | 0   | 1 | 31 |
| Igfbp6   | 0.547  | 0.75  | 0   | 1 | 31 |
| Ifi27l2a | 0.412  | 0.25  | 0   | 1 | 31 |
| Anxa1    | 0.370  | 0.25  | 0   | 1 | 31 |
| Rnf186   | 0.290  | 0.25  | 0   | 1 | 31 |
| Hspa1a   | -1.506 | 0.5   | 0.5 | 1 | 31 |
| Fbln1    | 0.350  | 0.262 | 0   | 1 | 31 |
| C2cd4a   | 0.340  | 0.262 | 0   | 1 | 31 |
| Gm20400  | 0.262  | 0.262 | 0   | 1 | 31 |
| Malat1   | 0.410  | 1     | 1   | 1 | 31 |
| Igfbp5   | -1.451 | 0.512 | 0.5 | 1 | 31 |
| Anxa2    | 0.801  | 0.725 | 0   | 1 | 31 |
| Igfbp4   | 0.698  | 0.725 | 0   | 1 | 31 |
| Ifi27    | 0.683  | 0.725 | 0   | 1 | 31 |
| Cd34     | 0.447  | 0.275 | 0   | 1 | 31 |

|            |        |       |     |   |    |
|------------|--------|-------|-----|---|----|
| Col3a1     | 0.399  | 0.275 | 0   | 1 | 31 |
| Fxyd6      | 0.361  | 0.275 | 0   | 1 | 31 |
| Copz2      | 0.311  | 0.275 | 0   | 1 | 31 |
| Cdkn1c     | 0.374  | 0.288 | 0   | 1 | 31 |
| Cela1      | 0.279  | 0.288 | 0   | 1 | 31 |
| Gsdma2     | 0.264  | 0.288 | 0   | 1 | 31 |
| Sptssb     | 1.010  | 0.7   | 0   | 1 | 31 |
| Ptgis      | 0.501  | 0.3   | 0   | 1 | 31 |
| Gm26532    | 0.456  | 0.3   | 0   | 1 | 31 |
| Cryab      | 0.414  | 0.3   | 0   | 1 | 31 |
| Hes1       | 0.305  | 0.3   | 0   | 1 | 31 |
| Hist2h2aa1 | 0.254  | 0.7   | 0   | 1 | 31 |
| Esd        | -1.764 | 0.6   | 0.5 | 1 | 31 |
| Gstm1      | -1.552 | 0.612 | 0.5 | 1 | 31 |
| Sparc      | 0.459  | 0.312 | 0   | 1 | 31 |
| Pdlim4     | 0.273  | 0.312 | 0   | 1 | 31 |
| Golm1      | -1.744 | 0.638 | 0.5 | 1 | 31 |
| Actg2      | 0.716  | 0.675 | 0   | 1 | 31 |
| Nkain4     | 0.526  | 0.325 | 0   | 1 | 31 |
| Dbnidd2    | 0.420  | 0.325 | 0   | 1 | 31 |
| Serping1   | -1.470 | 0.662 | 0.5 | 1 | 31 |
| Myl9       | -1.986 | 0.65  | 0.5 | 1 | 31 |
| Gsn        | 0.652  | 0.662 | 0   | 1 | 31 |
| Rarres2    | 0.501  | 0.338 | 0   | 1 | 31 |
| Timp2      | 0.392  | 0.338 | 0   | 1 | 31 |
| Atp4a      | 0.504  | 0.962 | 0.5 | 1 | 31 |
| Slc5a5     | 0.532  | 0.338 | 0   | 1 | 31 |
| Vim        | 1.110  | 0.65  | 0   | 1 | 31 |
| Flna       | 0.502  | 0.35  | 0   | 1 | 31 |
| Cyr61      | 0.462  | 0.35  | 0   | 1 | 31 |
| Klf2       | 0.375  | 0.35  | 0   | 1 | 31 |
| Bace2      | 0.351  | 0.35  | 0   | 1 | 31 |
| Tmsb10     | 0.398  | 1     | 1   | 1 | 31 |
| Hspa1b     | -1.729 | 0.7   | 0.5 | 1 | 31 |
| H2afz      | 0.904  | 0.638 | 0   | 1 | 31 |
| Atf3       | 0.728  | 0.638 | 0   | 1 | 31 |
| Foxq1      | 0.583  | 0.638 | 0   | 1 | 31 |
| Id3        | 0.525  | 0.362 | 0   | 1 | 31 |
| Wfdc2      | 0.406  | 0.362 | 0   | 1 | 31 |
| Des        | 0.371  | 0.362 | 0   | 1 | 31 |
| Gm3776     | 0.351  | 0.362 | 0   | 1 | 31 |
| Kcnj16     | 0.349  | 0.362 | 0   | 1 | 31 |
| Mal        | 0.330  | 0.638 | 0   | 1 | 31 |
| Gpm6b      | 0.357  | 0.162 | 0   | 1 | 31 |
| Fabp3      | 0.388  | 0.625 | 0   | 1 | 31 |
| Mgst2      | 0.356  | 0.375 | 0   | 1 | 31 |
| C2cd4b     | 0.332  | 0.375 | 0   | 1 | 31 |
| Prdx1      | 0.360  | 1     | 0.5 | 1 | 31 |
| Sult1c2    | -1.521 | 0.75  | 0.5 | 1 | 31 |
| Try4       | 0.646  | 0.612 | 0   | 1 | 31 |

|           |        |       |     |   |    |
|-----------|--------|-------|-----|---|----|
| Slc26a9   | 0.451  | 0.388 | 0   | 1 | 31 |
| Gm3839    | 0.447  | 0.388 | 0   | 1 | 31 |
| Hist1h2bc | 0.485  | 0.4   | 0   | 1 | 31 |
| Pthlh     | 0.460  | 0.4   | 0   | 1 | 31 |
| Ldhb      | 0.252  | 0.6   | 0   | 1 | 31 |
| ApoE      | -0.707 | 0.775 | 0.5 | 1 | 31 |
| Mogat1    | -1.654 | 0.8   | 0.5 | 1 | 31 |
| Tagln2    | -0.789 | 0.8   | 0.5 | 1 | 31 |
| Mt2       | 0.824  | 0.588 | 0   | 1 | 31 |
| Nqo1      | 0.483  | 0.412 | 0   | 1 | 31 |
| Cnn1      | 0.260  | 0.412 | 0   | 1 | 31 |
| Igfbp7    | 0.720  | 0.425 | 0   | 1 | 31 |
| Enpp2     | 0.635  | 0.575 | 0   | 1 | 31 |
| Tcim      | 0.493  | 0.425 | 0   | 1 | 31 |
| Ifitm3    | -1.299 | 0.85  | 0.5 | 1 | 31 |
| Fer1l6    | -2.196 | 0.712 | 0.5 | 1 | 31 |
| Ckmt1     | 0.715  | 0.562 | 0   | 1 | 31 |
| Tmem176b  | 0.686  | 0.562 | 0   | 1 | 31 |
| Hamp2     | 0.628  | 0.562 | 0   | 1 | 31 |
| C3        | 0.504  | 0.438 | 0   | 1 | 31 |
| Tmed3     | 0.424  | 0.562 | 0   | 1 | 31 |
| Zfp3612   | 0.324  | 0.562 | 0   | 1 | 31 |
| Sprr2a1   | -2.079 | 0.888 | 0.5 | 1 | 31 |
| Tpm2      | 0.708  | 0.55  | 0   | 1 | 31 |
| Dnajb1    | 0.611  | 0.55  | 0   | 1 | 31 |
| Hspb1     | 0.519  | 0.45  | 0   | 1 | 31 |
| Apoa1     | -1.454 | 0.9   | 0.5 | 1 | 31 |
| Cmpk2     | -2.199 | 0.838 | 0.5 | 1 | 31 |
| Prr13     | 0.755  | 0.462 | 0   | 1 | 31 |
| Tmed6     | 0.456  | 0.462 | 0   | 1 | 31 |
| Aldh3a1   | 0.448  | 0.462 | 0   | 1 | 31 |
| Fabp5     | 0.265  | 0.538 | 0   | 1 | 31 |
| Nme2      | -1.639 | 0.938 | 0.5 | 1 | 31 |
| Ly6c1     | -2.166 | 0.938 | 0.5 | 1 | 31 |
| Cxcl13    | 0.602  | 0.525 | 0   | 1 | 31 |
| Rbp2      | 0.490  | 0.475 | 0   | 1 | 31 |
| Selenom   | 0.455  | 0.475 | 0   | 1 | 31 |
| Clec3b    | 0.426  | 0.475 | 0   | 1 | 31 |
| Vsig1     | 0.375  | 0.475 | 0   | 1 | 31 |
| Idi1      | 0.281  | 0.475 | 0   | 1 | 31 |
| Ttr       | 0.274  | 0.525 | 0   | 1 | 31 |
| Psca      | 0.370  | 0.988 | 0.5 | 1 | 31 |
| Dpcr1     | -1.344 | 0.95  | 0.5 | 1 | 31 |
| Tagln     | -1.706 | 0.938 | 0.5 | 1 | 31 |
| Sst       | -2.113 | 0.95  | 0.5 | 1 | 31 |
| Jchain    | -2.216 | 0.912 | 0.5 | 1 | 31 |
| Acta2     | -0.995 | 0.95  | 0.5 | 1 | 31 |
| Smim6     | 0.675  | 0.512 | 0   | 1 | 31 |
| Csrp1     | 0.558  | 0.512 | 0   | 1 | 31 |
| Emp1      | -2.134 | 0.975 | 0.5 | 1 | 31 |

|               |        |       |       |             |    |
|---------------|--------|-------|-------|-------------|----|
| Gpx2          | -1.308 | 1     | 0.5   | 1           | 31 |
| Atp4b         | -1.323 | 0.975 | 0.5   | 1           | 31 |
| Tuba1b        | -1.332 | 1     | 0.5   | 1           | 31 |
| Lgals3        | -1.460 | 1     | 0.5   | 1           | 31 |
| Cox7a1        | -1.879 | 0.988 | 0.5   | 1           | 31 |
| S100a1        | 0.703  | 0.5   | 0     | 1           | 31 |
| Ly6a          | -0.711 | 1     | 0.5   | 1           | 31 |
| Crip1         | -0.732 | 0.988 | 0.5   | 1           | 31 |
| Mgst3         | -0.822 | 1     | 0.5   | 1           | 31 |
| H2-Eb1        | -0.903 | 1     | 0.5   | 1           | 31 |
| Rpl23a        | -0.906 | 1     | 0.5   | 1           | 31 |
| Clic6         | -1.002 | 1     | 0.5   | 1           | 31 |
| Rps15         | -1.031 | 1     | 0.5   | 1           | 31 |
| AW112010      | -1.167 | 1     | 0.5   | 1           | 31 |
| Rps2          | -1.401 | 1     | 0.5   | 1           | 31 |
| Pigr          | -1.413 | 1     | 0.5   | 1           | 31 |
| Id2           | -1.491 | 1     | 0.5   | 1           | 31 |
| Cym           | -1.644 | 1     | 0.5   | 1           | 31 |
| Muc6          | -1.727 | 1     | 0.5   | 1           | 31 |
| Cyba          | -1.737 | 1     | 0.5   | 1           | 31 |
| Gipc2         | -1.774 | 1     | 0.5   | 1           | 31 |
| Cpn1          | -1.808 | 1     | 0.5   | 1           | 31 |
| 2210404E10Rik | -1.844 | 1     | 0.5   | 1           | 31 |
| Basp1         | -1.854 | 1     | 0.5   | 1           | 31 |
| Ptgds         | -1.902 | 1     | 0.5   | 1           | 31 |
| Igkc          | -1.957 | 1     | 0.5   | 1           | 31 |
| Sprr1a        | -1.994 | 1     | 0.5   | 1           | 31 |
| Plet1         | -2.027 | 0.988 | 0.5   | 1           | 31 |
| Serpinb1a     | -2.035 | 1     | 0.5   | 1           | 31 |
| H2-DMb1       | -2.090 | 1     | 0.5   | 1           | 31 |
| Slc9a3        | -2.094 | 1     | 0.5   | 1           | 31 |
| Dmbt1         | -2.097 | 1     | 0.5   | 1           | 31 |
| Igtp          | -2.102 | 1     | 0.5   | 1           | 31 |
| Gbp2b         | -2.144 | 1     | 0.5   | 1           | 31 |
| Abcg2         | -2.169 | 0.988 | 0.5   | 1           | 31 |
| Hist1h2ap     | -2.177 | 0.988 | 0.5   | 1           | 31 |
| Far1          | -2.290 | 1     | 0.5   | 1           | 31 |
| Cxcl12        | 0.868  | 1     | 0     | 1.27E-06    | 32 |
| Pdlim3        | -1.206 | 0     | 0.235 | 1.51E-06    | 32 |
| Serpina1b     | 0.297  | 0.961 | 0     | 5.14E-06    | 32 |
| Hamp2         | 0.264  | 0.98  | 0     | 5.76E-06    | 32 |
| Abcc3         | -0.251 | 0.02  | 0.118 | 5.78E-06    | 32 |
| 1200007C13Rik | 0.290  | 0.961 | 0     | 1.14E-05    | 32 |
| Tnfaip2       | 0.418  | 0.941 | 0     | 2.21E-05    | 32 |
| Nrp1          | 0.331  | 0.902 | 0     | 7.97E-05    | 32 |
| Reg3g         | -0.290 | 1     | 0.059 | 0.000103183 | 32 |
| Tmem54        | -0.301 | 1     | 0.059 | 0.000103183 | 32 |
| Has1          | -0.303 | 1     | 0.059 | 0.000103183 | 32 |
| Cdca3         | -0.318 | 1     | 0.059 | 0.000103183 | 32 |
| Rassf9        | -0.325 | 1     | 0.059 | 0.000103183 | 32 |

|               |        |       |       |             |    |
|---------------|--------|-------|-------|-------------|----|
| Eng           | -0.354 | 1     | 0.059 | 0.000103183 | 32 |
| Gjb1          | -0.440 | 1     | 0.059 | 0.000103183 | 32 |
| Gipc2         | -0.513 | 1     | 0.059 | 0.000103183 | 32 |
| Rem1          | -0.490 | 0.078 | 0.176 | 0.000191771 | 32 |
| Cwh43         | -0.448 | 0.98  | 0.059 | 0.000362429 | 32 |
| Tnfrsf11b     | -0.810 | 0.078 | 0.235 | 0.000511362 | 32 |
| Agpat2        | -0.282 | 0.098 | 0.176 | 0.001025899 | 32 |
| F3            | -0.757 | 0.118 | 0.235 | 0.001216453 | 32 |
| Dusp5         | -0.397 | 0.118 | 0.176 | 0.001714773 | 32 |
| Cxcl1         | 0.787  | 1     | 0.118 | 0.002233601 | 32 |
| Tipin         | 0.289  | 1     | 0.118 | 0.002770194 | 32 |
| Cdkn1c        | -0.332 | 0.118 | 0.059 | 0.003107075 | 32 |
| Egfl7         | 0.312  | 0.745 | 0     | 0.00355693  | 32 |
| Sprr2a1       | -0.309 | 0.941 | 0.059 | 0.003844038 | 32 |
| Chgb          | -0.317 | 0.941 | 0.059 | 0.003844038 | 32 |
| Gfpt1         | -0.370 | 1     | 0.118 | 0.003950493 | 32 |
| Gkn3          | -0.281 | 1     | 0.118 | 0.004546876 | 32 |
| Rfk           | -0.376 | 1     | 0.118 | 0.004546876 | 32 |
| Chil4         | -0.278 | 1     | 0.118 | 0.004876595 | 32 |
| Serpine2      | -0.298 | 1     | 0.118 | 0.004876595 | 32 |
| Phgr1         | -0.435 | 1     | 0.118 | 0.004876595 | 32 |
| Hist1h2ae     | -0.449 | 1     | 0.118 | 0.004876595 | 32 |
| Teddm3        | -0.450 | 1     | 0.118 | 0.004876595 | 32 |
| Sfn           | -0.475 | 1     | 0.118 | 0.004876595 | 32 |
| Ctse          | -0.532 | 1     | 0.118 | 0.004876595 | 32 |
| AA467197      | -0.623 | 1     | 0.118 | 0.004876595 | 32 |
| Col5a3        | -0.319 | 0.902 | 0.059 | 0.006076502 | 32 |
| 1810010D01Rik | 0.321  | 0.137 | 0     | 0.014773008 | 32 |
| Ogn           | -0.273 | 0.157 | 0.176 | 0.018144378 | 32 |
| Slurp1        | -0.300 | 0.941 | 0.118 | 0.02064822  | 32 |
| Olr1          | -0.419 | 0.941 | 0.118 | 0.02064822  | 32 |
| Anxa8         | -0.496 | 0.941 | 0.118 | 0.02064822  | 32 |
| Synpo2        | -0.361 | 0.941 | 0.118 | 0.026763937 | 32 |
| Spink4        | -0.294 | 0.922 | 0.118 | 0.032617736 | 32 |
| Nr4a1         | 0.498  | 1     | 0.176 | 0.034792089 | 32 |
| Cygb          | -0.555 | 0.196 | 0.235 | 0.037722497 | 32 |
| Gm26532       | 0.426  | 1     | 0.176 | 0.042136565 | 32 |
| Hmox1         | 0.404  | 0.157 | 0     | 0.044790261 | 32 |
| Cdkn1a        | -0.574 | 0.176 | 0.118 | 0.046928778 | 32 |
| lfi211        | 0.291  | 1     | 0.176 | 0.047828942 | 32 |
| Rtl8a         | -0.355 | 0.176 | 0.235 | 0.051779713 | 32 |
| Slbp          | -0.434 | 0.176 | 0.118 | 0.06424066  | 32 |
| Rbp4          | -0.410 | 0.196 | 0.176 | 0.074071833 | 32 |
| Gm26917       | -0.666 | 0.196 | 0.176 | 0.074071833 | 32 |
| Abca8a        | 0.253  | 0.157 | 0     | 0.074355224 | 32 |
| H2-Eb1        | 0.813  | 1     | 0.235 | 0.075242109 | 32 |
| Gpsm3         | 0.293  | 0.98  | 0.176 | 0.094701151 | 32 |
| Sulf1         | -0.323 | 1     | 0.176 | 0.100651682 | 32 |
| Foxf1         | -0.336 | 1     | 0.176 | 0.120702231 | 32 |
| Cnmd          | 0.399  | 0.157 | 0     | 0.121689016 | 32 |



|               |        |       |       |             |    |
|---------------|--------|-------|-------|-------------|----|
| Fam46c        | 0.368  | 0.176 | 0     | 0.128355756 | 32 |
| Ddit4         | 0.356  | 0.176 | 0     | 0.128355756 | 32 |
| Chl1          | 0.317  | 0.176 | 0     | 0.128355756 | 32 |
| Gm49083       | 0.297  | 0.176 | 0     | 0.128355756 | 32 |
| Sult1c2       | 0.285  | 0.176 | 0     | 0.128355756 | 32 |
| Sprr1a        | -0.286 | 1     | 0.176 | 0.13611076  | 32 |
| Pigr          | -0.323 | 1     | 0.176 | 0.13611076  | 32 |
| Bex1          | -0.335 | 1     | 0.176 | 0.13611076  | 32 |
| Clic3         | -0.572 | 1     | 0.176 | 0.13611076  | 32 |
| Pkhd1l1       | 0.347  | 1     | 0.235 | 0.155602368 | 32 |
| Irf7          | -0.293 | 0.196 | 0.059 | 0.198967    | 32 |
| Igfbp2        | -0.571 | 0.216 | 0.176 | 0.206003963 | 32 |
| Scarb1        | 0.333  | 0.196 | 0     | 0.347751141 | 32 |
| Fam84a        | -0.272 | 0.941 | 0.176 | 0.347751141 | 32 |
| Tnxb          | -0.301 | 0.255 | 0.294 | 0.419980688 | 32 |
| Prg4          | -0.284 | 0.941 | 0.176 | 0.436099922 | 32 |
| Fam25c        | -0.440 | 0.941 | 0.176 | 0.436099922 | 32 |
| Lamc2         | -0.464 | 0.941 | 0.176 | 0.436099922 | 32 |
| Krt14         | -0.503 | 0.941 | 0.176 | 0.436099922 | 32 |
| Mfap5         | -0.393 | 0.216 | 0.059 | 0.497090045 | 32 |
| Thy1          | -0.283 | 0.961 | 0.176 | 0.54192875  | 32 |
| Igfbp6        | -0.784 | 1     | 1     | 0.716456374 | 32 |
| Serpinf1      | -0.307 | 1     | 0.235 | 0.72125565  | 32 |
| Cyr61         | -0.415 | 0.255 | 0.235 | 0.761369041 | 32 |
| Gadd45b       | 0.513  | 0.922 | 0.176 | 0.794178899 | 32 |
| Dclk1         | 0.500  | 0.784 | 0     | 0.890967838 | 32 |
| Gfpt2         | 0.390  | 0.216 | 0     | 0.890967838 | 32 |
| Cavin1        | -0.764 | 0.804 | 0.824 | 1           | 32 |
| Atp4a         | -0.438 | 0.235 | 0.059 | 1           | 32 |
| Lmo4          | -0.315 | 0.294 | 0.353 | 1           | 32 |
| B930036N10Rik | -0.496 | 0.941 | 0.176 | 1           | 32 |
| Cst3          | -0.769 | 1     | 1     | 1           | 32 |
| Hmgcs1        | -0.564 | 0.275 | 0.176 | 1           | 32 |
| Wfdc2         | -0.279 | 1     | 0.235 | 1           | 32 |
| Mafb          | -0.294 | 0.784 | 0.059 | 1           | 32 |
| Hdc           | 0.318  | 0.196 | 0     | 1           | 32 |
| Aqp1          | -0.372 | 1     | 0.235 | 1           | 32 |
| Saa3          | 2.420  | 0.765 | 0     | 1           | 32 |
| Ccl2          | 1.694  | 0.235 | 0     | 1           | 32 |
| Hmgb2         | 0.413  | 0.235 | 0     | 1           | 32 |
| Plaur         | 0.393  | 0.235 | 0     | 1           | 32 |
| Sirpa         | 0.376  | 0.235 | 0     | 1           | 32 |
| Cenpw         | 0.349  | 0.235 | 0     | 1           | 32 |
| Fkbp11        | 0.315  | 0.235 | 0     | 1           | 32 |
| Edem1         | 0.262  | 0.235 | 0     | 1           | 32 |
| Col12a1       | -0.628 | 1     | 0.235 | 1           | 32 |
| Steap4        | 0.269  | 1     | 0.294 | 1           | 32 |
| Clic1         | -0.650 | 0.765 | 0.765 | 1           | 32 |
| Cpxm1         | -0.270 | 0.255 | 0.059 | 1           | 32 |
| Timpt2        | -0.480 | 0.922 | 0.941 | 1           | 32 |

|               |        |       |       |   |    |
|---------------|--------|-------|-------|---|----|
| Thbs1         | -0.632 | 0.922 | 0.176 | 1 | 32 |
| Isg15         | 0.293  | 0.941 | 0.235 | 1 | 32 |
| Gbp7          | 0.286  | 0.255 | 0.059 | 1 | 32 |
| Nfe2l2        | -0.799 | 0.294 | 0.176 | 1 | 32 |
| Cxcl2         | 0.957  | 0.745 | 0     | 1 | 32 |
| Phlda1        | 0.287  | 0.255 | 0     | 1 | 32 |
| Crip1         | -0.674 | 1     | 1     | 1 | 32 |
| Cotl1         | 0.260  | 0.784 | 0.059 | 1 | 32 |
| Sfrp2         | -0.901 | 0.941 | 0.235 | 1 | 32 |
| Ckb           | -0.282 | 0.294 | 0.118 | 1 | 32 |
| Cav1          | -0.791 | 0.961 | 0.882 | 1 | 32 |
| Cxcl13        | 2.524  | 0.961 | 0.353 | 1 | 32 |
| S100a10       | -0.554 | 0.961 | 0.882 | 1 | 32 |
| Bgn           | 0.372  | 0.294 | 0.176 | 1 | 32 |
| Jam3          | 0.387  | 0.255 | 0     | 1 | 32 |
| Srpx          | 0.352  | 0.275 | 0     | 1 | 32 |
| Meg3          | -0.749 | 1     | 0.824 | 1 | 32 |
| Actb          | -1.098 | 1     | 0.882 | 1 | 32 |
| Emp3          | -0.956 | 0.941 | 0.765 | 1 | 32 |
| Podn          | -0.358 | 0.922 | 0.235 | 1 | 32 |
| Htra3         | -0.509 | 0.294 | 0.059 | 1 | 32 |
| S100a6        | -0.425 | 1     | 1     | 1 | 32 |
| Nid1          | -0.570 | 0.98  | 0.294 | 1 | 32 |
| Fam180a       | -0.519 | 0.373 | 0.235 | 1 | 32 |
| Lhfp          | 0.593  | 0.863 | 0.294 | 1 | 32 |
| Hs3st1        | -0.291 | 0.471 | 0.529 | 1 | 32 |
| S100a4        | -0.692 | 1     | 0.294 | 1 | 32 |
| Cyp1b1        | 0.696  | 0.706 | 0     | 1 | 32 |
| Tmem119       | 0.476  | 0.706 | 0     | 1 | 32 |
| Kcnj8         | 0.467  | 0.294 | 0     | 1 | 32 |
| Adamts1       | 0.392  | 0.294 | 0     | 1 | 32 |
| Maff          | 0.318  | 0.294 | 0     | 1 | 32 |
| Il18          | -0.260 | 0.353 | 0.235 | 1 | 32 |
| Ppp1r14a      | -0.424 | 1     | 0.294 | 1 | 32 |
| Smoc2         | -0.596 | 1     | 0.294 | 1 | 32 |
| Col5a1        | -0.402 | 0.314 | 0.059 | 1 | 32 |
| Fndc1         | 0.368  | 0.745 | 0.059 | 1 | 32 |
| Rarres2       | -0.706 | 0.961 | 0.882 | 1 | 32 |
| 2210407C18Rik | -0.768 | 0.98  | 0.294 | 1 | 32 |
| Pcdh7         | -0.388 | 0.333 | 0.118 | 1 | 32 |
| Cebpb         | 0.637  | 1     | 0.647 | 1 | 32 |
| Mt1           | -0.735 | 0.941 | 0.824 | 1 | 32 |
| Acs1          | 0.375  | 0.176 | 0     | 1 | 32 |
| Anxa2         | -0.613 | 0.882 | 0.824 | 1 | 32 |
| Fhl1          | -1.009 | 0.471 | 0.353 | 1 | 32 |
| Cldn3         | 0.619  | 0.314 | 0     | 1 | 32 |
| Pdgfra        | 0.413  | 0.314 | 0     | 1 | 32 |
| Cela1         | 0.329  | 0.314 | 0     | 1 | 32 |
| Gm12840       | -1.257 | 1     | 0.706 | 1 | 32 |
| Cavin2        | -0.735 | 0.549 | 0.471 | 1 | 32 |

|         |        |       |       |   |    |
|---------|--------|-------|-------|---|----|
| Apln    | 0.456  | 0.294 | 0     | 1 | 32 |
| Tm4sf1  | -0.386 | 1     | 0.765 | 1 | 32 |
| Mustn1  | -0.286 | 0.765 | 0.118 | 1 | 32 |
| Rdx     | -0.326 | 0.922 | 0.294 | 1 | 32 |
| Abhd2   | -0.667 | 0.941 | 0.294 | 1 | 32 |
| Krt7    | -0.473 | 1     | 0.353 | 1 | 32 |
| Cp      | 0.435  | 0.686 | 0.059 | 1 | 32 |
| Hspg2   | 0.432  | 0.353 | 0.118 | 1 | 32 |
| Plpp3   | 0.437  | 0.333 | 0     | 1 | 32 |
| Dpt     | 0.297  | 0.667 | 0     | 1 | 32 |
| Fcgr2b  | 0.254  | 0.333 | 0     | 1 | 32 |
| Ndr1    | -0.257 | 0.922 | 0.294 | 1 | 32 |
| Tmeff2  | 0.312  | 0.353 | 0.059 | 1 | 32 |
| Slpi    | -1.529 | 1     | 0.706 | 1 | 32 |
| Gas1    | -0.646 | 1     | 0.765 | 1 | 32 |
| Gm2a    | -0.269 | 0.471 | 0.353 | 1 | 32 |
| Bcas1   | 0.280  | 0.235 | 0     | 1 | 32 |
| Procr   | -0.587 | 0.392 | 0.118 | 1 | 32 |
| Gm11361 | -0.399 | 1     | 0.353 | 1 | 32 |
| Pla2g1b | -0.316 | 0.863 | 0.294 | 1 | 32 |
| Upk1b   | -0.925 | 1     | 0.353 | 1 | 32 |
| Gpx3    | -1.106 | 1     | 0.353 | 1 | 32 |
| S100a1  | -0.718 | 0.941 | 0.706 | 1 | 32 |
| Krt19   | -0.770 | 0.961 | 0.706 | 1 | 32 |
| Csf1    | -0.369 | 0.431 | 0.235 | 1 | 32 |
| Hsd11b1 | 0.666  | 0.353 | 0     | 1 | 32 |
| Bok     | 0.424  | 0.353 | 0     | 1 | 32 |
| Fgl2    | -0.618 | 1     | 0.353 | 1 | 32 |
| Ltbp1   | -1.025 | 1     | 0.353 | 1 | 32 |
| Cldn15  | -0.476 | 0.49  | 0.294 | 1 | 32 |
| Irf1    | 0.305  | 0.392 | 0.118 | 1 | 32 |
| Aldh1a2 | -0.657 | 0.569 | 0.412 | 1 | 32 |
| Lgals1  | -0.711 | 0.98  | 0.706 | 1 | 32 |
| Tmsb10  | -0.366 | 1     | 0.882 | 1 | 32 |
| Pde4b   | 0.324  | 0.353 | 0     | 1 | 32 |
| Dmkn    | -1.338 | 1     | 0.647 | 1 | 32 |
| Mt2     | -0.868 | 1     | 0.706 | 1 | 32 |
| Col18a1 | -0.281 | 0.529 | 0.412 | 1 | 32 |
| Plac8   | -0.280 | 1     | 0.706 | 1 | 32 |
| Msn     | -0.347 | 0.51  | 0.353 | 1 | 32 |
| Msln    | -0.880 | 1     | 0.706 | 1 | 32 |
| Rnase4  | -0.721 | 0.784 | 0.588 | 1 | 32 |
| Lgals9  | -0.370 | 0.431 | 0.176 | 1 | 32 |
| Nbl1    | -0.487 | 0.961 | 0.824 | 1 | 32 |
| Ctla2a  | 0.335  | 0.588 | 0     | 1 | 32 |
| Tst     | -0.756 | 0.49  | 0.294 | 1 | 32 |
| Rasl11a | -0.518 | 1     | 0.412 | 1 | 32 |
| Ar      | -0.447 | 0.471 | 0.235 | 1 | 32 |
| Ccdc80  | 0.376  | 1     | 0.882 | 1 | 32 |
| Rcn3    | 0.278  | 0.824 | 0.353 | 1 | 32 |

|           |        |       |       |   |    |
|-----------|--------|-------|-------|---|----|
| Vim       | -0.515 | 0.98  | 0.706 | 1 | 32 |
| Fstl1     | -0.306 | 0.471 | 0.235 | 1 | 32 |
| Serpinb1a | -0.493 | 1     | 0.412 | 1 | 32 |
| Hist1h1c  | -0.781 | 0.941 | 0.647 | 1 | 32 |
| Il34      | -0.324 | 0.412 | 0.059 | 1 | 32 |
| Cd74      | 0.716  | 1     | 0.882 | 1 | 32 |
| H2-T23    | 0.577  | 0.647 | 0.118 | 1 | 32 |
| Cebpd     | -0.435 | 0.451 | 0.176 | 1 | 32 |
| Fbln2     | 0.387  | 0.647 | 0.059 | 1 | 32 |
| Neat1     | -0.399 | 1     | 0.471 | 1 | 32 |
| Atf3      | 0.605  | 0.471 | 0.235 | 1 | 32 |
| Ube2s     | -0.363 | 1     | 0.412 | 1 | 32 |
| Ramp2     | 0.599  | 0.392 | 0     | 1 | 32 |
| Plvap     | 0.581  | 0.392 | 0     | 1 | 32 |
| Hopx      | 0.342  | 0.392 | 0     | 1 | 32 |
| Ecm1      | -0.277 | 0.667 | 0.529 | 1 | 32 |
| Mmp23     | -0.556 | 0.843 | 0.294 | 1 | 32 |
| Tdo2      | -1.052 | 0.922 | 0.353 | 1 | 32 |
| Pdpm      | -0.351 | 0.627 | 0.471 | 1 | 32 |
| Socs3     | 0.435  | 0.451 | 0.176 | 1 | 32 |
| Nkain4    | -0.353 | 0.941 | 0.529 | 1 | 32 |
| Atp4b     | 0.335  | 0.412 | 0.059 | 1 | 32 |
| Cfb       | 0.875  | 0.627 | 0.118 | 1 | 32 |
| Anxa3     | -0.424 | 0.784 | 0.235 | 1 | 32 |
| Lgals7    | -0.436 | 1     | 0.647 | 1 | 32 |
| Prima1    | -0.294 | 0.235 | 0.059 | 1 | 32 |
| Csrp1     | -0.407 | 0.647 | 0.471 | 1 | 32 |
| Rpp25     | 0.274  | 0.431 | 0.118 | 1 | 32 |
| Cnn2      | -0.304 | 0.451 | 0.118 | 1 | 32 |
| Col6a2    | -0.339 | 0.569 | 0.353 | 1 | 32 |
| Esd       | -0.268 | 0.686 | 0.529 | 1 | 32 |
| AY036118  | 1.112  | 0.667 | 0.176 | 1 | 32 |
| Fgfbp1    | -0.778 | 1     | 0.412 | 1 | 32 |
| Gm11808   | -0.827 | 1     | 0.412 | 1 | 32 |
| Nupr1     | -0.734 | 0.706 | 0.471 | 1 | 32 |
| Vamp5     | 0.732  | 0.412 | 0     | 1 | 32 |
| Serpina3n | 0.361  | 0.412 | 0     | 1 | 32 |
| Col14a1   | -0.304 | 1     | 0.412 | 1 | 32 |
| Usp50     | -0.647 | 1     | 0.412 | 1 | 32 |
| Ucp2      | 0.311  | 0.882 | 0.529 | 1 | 32 |
| Cavin3    | -0.256 | 0.843 | 0.706 | 1 | 32 |
| Wfdc1     | -0.362 | 0.725 | 0.529 | 1 | 32 |
| Atp5k     | -0.411 | 1     | 0.706 | 1 | 32 |
| Pltp      | 0.602  | 0.608 | 0.059 | 1 | 32 |
| Tgfbi     | 0.799  | 0.608 | 0.118 | 1 | 32 |
| Gbp2      | -0.344 | 0.686 | 0.471 | 1 | 32 |
| mt-Nd3    | -0.414 | 1     | 0.588 | 1 | 32 |
| Ppp1r15a  | 0.524  | 0.431 | 0.059 | 1 | 32 |
| Tuba1b    | -0.433 | 0.765 | 0.529 | 1 | 32 |
| Sparc     | -0.286 | 0.922 | 0.706 | 1 | 32 |

|           |        |       |       |   |    |
|-----------|--------|-------|-------|---|----|
| Clec3b    | -0.519 | 0.922 | 0.882 | 1 | 32 |
| Krt8      | -0.383 | 1     | 0.647 | 1 | 32 |
| Lars2     | 0.659  | 0.569 | 0     | 1 | 32 |
| Dbn1      | 0.429  | 0.569 | 0     | 1 | 32 |
| Spon2     | 0.256  | 0.431 | 0     | 1 | 32 |
| Gatm      | 0.924  | 0.431 | 0.059 | 1 | 32 |
| Wnt5a     | -0.928 | 1     | 0.588 | 1 | 32 |
| Vegfd     | -0.492 | 0.725 | 0.235 | 1 | 32 |
| Gsta4     | 0.296  | 1     | 0.529 | 1 | 32 |
| S100a13   | -0.437 | 0.569 | 0.235 | 1 | 32 |
| Hpgd      | -1.064 | 0.941 | 0.412 | 1 | 32 |
| Hspb1     | -0.420 | 0.922 | 0.647 | 1 | 32 |
| Anxa1     | -0.351 | 0.804 | 0.647 | 1 | 32 |
| Irf3      | 0.801  | 0.667 | 0.294 | 1 | 32 |
| Tff2      | -0.705 | 1     | 0.471 | 1 | 32 |
| Id4       | -0.645 | 0.784 | 0.294 | 1 | 32 |
| Pgc       | -0.302 | 0.784 | 0.353 | 1 | 32 |
| Nfkb1     | 0.509  | 0.569 | 0.353 | 1 | 32 |
| Gm3839    | 0.250  | 0.471 | 0.059 | 1 | 32 |
| Ugt1a7c   | 0.371  | 0.549 | 0     | 1 | 32 |
| Tmem255a  | 0.325  | 0.451 | 0     | 1 | 32 |
| C2        | -0.495 | 0.824 | 0.588 | 1 | 32 |
| Lgals3    | -0.662 | 0.98  | 0.647 | 1 | 32 |
| Gsn       | 0.297  | 0.608 | 0.118 | 1 | 32 |
| C1s1      | -0.474 | 0.824 | 0.529 | 1 | 32 |
| Sprr2a3   | -0.817 | 1     | 0.471 | 1 | 32 |
| Tagln2    | -0.418 | 0.843 | 0.529 | 1 | 32 |
| Nme2      | -0.579 | 0.745 | 0.294 | 1 | 32 |
| Mgp       | -0.538 | 0.745 | 0.529 | 1 | 32 |
| Prdx1     | -0.424 | 0.98  | 0.765 | 1 | 32 |
| Igfbp7    | -0.261 | 0.961 | 0.824 | 1 | 32 |
| Prr15     | -1.167 | 1     | 0.471 | 1 | 32 |
| Wnt4      | 0.414  | 0.49  | 0.118 | 1 | 32 |
| C1ra      | -0.577 | 0.647 | 0.235 | 1 | 32 |
| Tppp3     | -0.533 | 0.745 | 0.294 | 1 | 32 |
| Rpl9-ps6  | -0.907 | 0.647 | 0.294 | 1 | 32 |
| H2afz     | -0.296 | 0.941 | 0.706 | 1 | 32 |
| Bcam      | -1.115 | 0.961 | 0.529 | 1 | 32 |
| Hist1h2bc | -0.442 | 1     | 0.647 | 1 | 32 |
| Adam15    | 0.434  | 0.471 | 0.059 | 1 | 32 |
| Clps      | -0.478 | 1     | 0.824 | 1 | 32 |
| Cyba      | -0.359 | 0.902 | 0.588 | 1 | 32 |
| Fabp4     | 1.807  | 0.471 | 0     | 1 | 32 |
| Ptges     | 0.466  | 0.471 | 0     | 1 | 32 |
| Chia1     | 0.363  | 0.471 | 0     | 1 | 32 |
| C4b       | -0.393 | 1     | 0.647 | 1 | 32 |
| Lrrn4     | -0.559 | 1     | 0.647 | 1 | 32 |
| Cldn10    | -0.434 | 0.804 | 0.412 | 1 | 32 |
| Spon1     | 0.461  | 0.549 | 0.294 | 1 | 32 |
| Arf2      | -0.296 | 0.569 | 0.176 | 1 | 32 |

|           |        |       |       |             |    |
|-----------|--------|-------|-------|-------------|----|
| Muc16     | -0.757 | 1     | 0.529 | 1           | 32 |
| Cfh       | -0.300 | 0.961 | 0.529 | 1           | 32 |
| Basp1     | -0.853 | 1     | 0.529 | 1           | 32 |
| Mfge8     | -0.300 | 0.549 | 0.059 | 1           | 32 |
| Pmp22     | -0.436 | 0.843 | 0.471 | 1           | 32 |
| Bst2      | -0.420 | 0.941 | 0.706 | 1           | 32 |
| Igfbp3    | 0.596  | 0.51  | 0.059 | 1           | 32 |
| Tpm1      | -0.631 | 0.627 | 0.294 | 1           | 32 |
| Fxyd5     | 0.331  | 0.49  | 0     | 1           | 32 |
| Tnfsf13   | 0.287  | 0.49  | 0     | 1           | 32 |
| Prelp     | 0.297  | 0.549 | 0.118 | 1           | 32 |
| Hotairm1  | -0.727 | 1     | 0.529 | 1           | 32 |
| Osr1      | -0.596 | 0.627 | 0.235 | 1           | 32 |
| Smpd3     | -0.906 | 1     | 0.588 | 1           | 32 |
| Zfp36     | 1.107  | 0.549 | 0.176 | 1           | 32 |
| Cd200     | -0.314 | 1     | 0.588 | 1           | 32 |
| Nid2      | -0.395 | 0.608 | 0.176 | 1           | 32 |
| Lypd8     | 0.290  | 1     | 0     | 0.142311584 | 33 |
| Pga5      | 0.264  | 1     | 0     | 0.142311584 | 33 |
| Bex4      | 0.283  | 0.981 | 0     | 0.194775026 | 33 |
| Trp53inp1 | -0.278 | 0.038 | 0.167 | 0.494695509 | 33 |
| Plvap     | -0.412 | 0.058 | 0.333 | 0.810177376 | 33 |
| Gsto1     | 0.630  | 0.942 | 0     | 0.887618731 | 33 |
| Spp1      | 1.566  | 0.846 | 0     | 1           | 33 |
| Tgfb3     | 0.629  | 0.923 | 0     | 1           | 33 |
| Lmo4      | -0.544 | 0.096 | 0.333 | 1           | 33 |
| Idi1      | -0.336 | 0.096 | 0.167 | 1           | 33 |
| Arf2      | -0.367 | 0.096 | 0.333 | 1           | 33 |
| Ggh       | -0.262 | 0.115 | 0.167 | 1           | 33 |
| Fabp7     | -0.280 | 0.115 | 0.167 | 1           | 33 |
| Matn2     | -0.308 | 0.115 | 0.167 | 1           | 33 |
| Bace2     | -0.319 | 0.135 | 0.167 | 1           | 33 |
| Hmgcs1    | 0.520  | 0.115 | 0     | 1           | 33 |
| F2r       | 0.421  | 0.115 | 0     | 1           | 33 |
| Pla2g7    | 0.406  | 0.115 | 0     | 1           | 33 |
| Serpinb1a | 0.311  | 0.115 | 0     | 1           | 33 |
| Tgm2      | 0.255  | 0.115 | 0     | 1           | 33 |
| Isg15     | -0.344 | 0.135 | 0.167 | 1           | 33 |
| Ptch1     | 0.400  | 0.808 | 0     | 1           | 33 |
| Nsg1      | 0.536  | 0.115 | 0     | 1           | 33 |
| Copz2     | -0.606 | 0.173 | 0.333 | 1           | 33 |
| Plau      | 1.055  | 0.135 | 0     | 1           | 33 |
| Sptssb    | 0.513  | 0.135 | 0     | 1           | 33 |
| Atp4a     | 0.469  | 0.135 | 0     | 1           | 33 |
| Spon2     | 0.456  | 0.135 | 0     | 1           | 33 |
| Scarb1    | 0.383  | 0.135 | 0     | 1           | 33 |
| Sox9      | 0.355  | 0.135 | 0     | 1           | 33 |
| Nqo1      | 0.298  | 0.135 | 0     | 1           | 33 |
| Oxct1     | 0.258  | 0.135 | 0     | 1           | 33 |
| Hopx      | 0.615  | 1     | 0.167 | 1           | 33 |

|           |        |       |       |   |    |
|-----------|--------|-------|-------|---|----|
| Jam3      | 0.287  | 0.135 | 0     | 1 | 33 |
| Ghrl      | 0.634  | 1     | 0.167 | 1 | 33 |
| Sult1a1   | 0.619  | 0.154 | 0     | 1 | 33 |
| Actg2     | 0.469  | 0.154 | 0     | 1 | 33 |
| Krt19     | 0.368  | 0.846 | 0     | 1 | 33 |
| Furin     | 0.287  | 0.154 | 0     | 1 | 33 |
| Thy1      | -0.399 | 0.192 | 0.333 | 1 | 33 |
| Gm26917   | 0.281  | 1     | 0.167 | 1 | 33 |
| Hmgn2     | -0.408 | 0.192 | 0.333 | 1 | 33 |
| Mfap2     | -0.259 | 0.173 | 0.167 | 1 | 33 |
| Zfp428    | 0.457  | 0.154 | 0     | 1 | 33 |
| Pxdn      | 0.321  | 0.827 | 0     | 1 | 33 |
| Incenp    | -0.271 | 1     | 0.167 | 1 | 33 |
| Gfpt1     | -0.292 | 1     | 0.167 | 1 | 33 |
| Tmem189   | -0.331 | 1     | 0.167 | 1 | 33 |
| Mdk       | -0.365 | 1     | 0.167 | 1 | 33 |
| H2-DMb2   | -0.261 | 1     | 0.167 | 1 | 33 |
| Creb3l4   | -0.274 | 1     | 0.167 | 1 | 33 |
| Klk1      | -0.277 | 1     | 0.167 | 1 | 33 |
| Gcnt3     | -0.279 | 1     | 0.167 | 1 | 33 |
| Hist1h4n  | -0.281 | 1     | 0.167 | 1 | 33 |
| Galnt6    | -0.282 | 1     | 0.167 | 1 | 33 |
| Plet1     | -0.282 | 1     | 0.167 | 1 | 33 |
| Racgap1   | -0.282 | 1     | 0.167 | 1 | 33 |
| Col11a2   | -0.282 | 1     | 0.167 | 1 | 33 |
| Wfdc18    | -0.282 | 1     | 0.167 | 1 | 33 |
| Birc5     | -0.282 | 1     | 0.167 | 1 | 33 |
| Nusap1    | -0.282 | 1     | 0.167 | 1 | 33 |
| Hells     | -0.282 | 1     | 0.167 | 1 | 33 |
| Plk1      | -0.282 | 1     | 0.167 | 1 | 33 |
| Pld4      | -0.282 | 1     | 0.167 | 1 | 33 |
| Tpx2      | -0.282 | 1     | 0.167 | 1 | 33 |
| Hist1h2bp | -0.282 | 1     | 0.167 | 1 | 33 |
| Lockd     | -0.282 | 1     | 0.167 | 1 | 33 |
| Rrm2      | -0.282 | 1     | 0.167 | 1 | 33 |
| Ccnb1     | -0.282 | 1     | 0.167 | 1 | 33 |
| Spc24     | -0.283 | 1     | 0.167 | 1 | 33 |
| Lamc2     | -0.284 | 1     | 0.167 | 1 | 33 |
| Ar        | -0.290 | 1     | 0.167 | 1 | 33 |
| Cyp2s1    | -0.292 | 1     | 0.167 | 1 | 33 |
| Lrg1      | -0.293 | 1     | 0.167 | 1 | 33 |
| Gsdma2    | -0.305 | 1     | 0.167 | 1 | 33 |
| Adgrf5    | -0.363 | 1     | 0.167 | 1 | 33 |
| Gast      | -0.375 | 1     | 0.167 | 1 | 33 |
| Cd74      | -0.405 | 1     | 0.167 | 1 | 33 |
| Cd40      | -0.432 | 1     | 0.167 | 1 | 33 |
| Pigr      | -0.448 | 1     | 0.167 | 1 | 33 |
| Chka      | -0.488 | 1     | 0.167 | 1 | 33 |
| Ctse      | -0.499 | 1     | 0.167 | 1 | 33 |
| Gm3776    | -0.504 | 1     | 0.167 | 1 | 33 |

|               |        |       |       |   |    |
|---------------|--------|-------|-------|---|----|
| Col15a1       | -0.505 | 1     | 0.167 | 1 | 33 |
| Il1r2         | -0.507 | 1     | 0.167 | 1 | 33 |
| Ifi211        | -0.508 | 1     | 0.167 | 1 | 33 |
| Mcpt1         | -0.508 | 1     | 0.167 | 1 | 33 |
| Alox15        | -0.508 | 1     | 0.167 | 1 | 33 |
| Rep15         | -0.512 | 1     | 0.167 | 1 | 33 |
| Spdef         | -0.521 | 1     | 0.167 | 1 | 33 |
| Uhrf1         | -0.527 | 1     | 0.167 | 1 | 33 |
| Sfn9          | -0.535 | 1     | 0.167 | 1 | 33 |
| Clu           | -0.588 | 1     | 0.167 | 1 | 33 |
| Mki67         | -0.642 | 1     | 0.167 | 1 | 33 |
| Cd36          | -0.654 | 1     | 0.167 | 1 | 33 |
| Hist1h2ap     | -0.892 | 1     | 0.167 | 1 | 33 |
| Ect2          | -0.893 | 1     | 0.167 | 1 | 33 |
| H2-T23        | -1.006 | 1     | 0.167 | 1 | 33 |
| Gm42047       | -1.012 | 1     | 0.167 | 1 | 33 |
| Top2a         | -1.024 | 1     | 0.167 | 1 | 33 |
| Ncf4          | -1.095 | 1     | 0.167 | 1 | 33 |
| Cxcl9         | -1.299 | 1     | 0.167 | 1 | 33 |
| Fabp4         | -1.578 | 1     | 0.167 | 1 | 33 |
| Ccl19         | -1.624 | 1     | 0.167 | 1 | 33 |
| Muc6          | -2.152 | 1     | 0.167 | 1 | 33 |
| Rasd1         | 1.302  | 0.173 | 0     | 1 | 33 |
| 1810010D01Rik | 1.002  | 0.173 | 0     | 1 | 33 |
| Hilpda        | 0.798  | 0.173 | 0     | 1 | 33 |
| Nes           | 0.359  | 0.173 | 0     | 1 | 33 |
| Rbpms2        | 0.319  | 0.173 | 0     | 1 | 33 |
| Myc           | 0.334  | 0.981 | 0.167 | 1 | 33 |
| Cxcl10        | -0.668 | 0.981 | 0.167 | 1 | 33 |
| Cavin1        | 0.294  | 0.962 | 0.167 | 1 | 33 |
| Plpp3         | 0.360  | 0.962 | 0.167 | 1 | 33 |
| Lmod1         | 0.420  | 0.135 | 0     | 1 | 33 |
| Pttg1         | 0.344  | 0.808 | 0     | 1 | 33 |
| C3            | -0.439 | 0.981 | 0.167 | 1 | 33 |
| Mef2c         | 0.376  | 0.942 | 0.167 | 1 | 33 |
| Prnp          | -0.278 | 0.231 | 0.333 | 1 | 33 |
| Ddit4         | 1.019  | 0.192 | 0     | 1 | 33 |
| Gm13861       | 0.470  | 0.192 | 0     | 1 | 33 |
| Peg3          | 0.422  | 0.192 | 0     | 1 | 33 |
| Sult1c2       | 0.369  | 0.192 | 0     | 1 | 33 |
| Rnase4        | 0.266  | 0.192 | 0     | 1 | 33 |
| Foxq1         | 0.254  | 0.192 | 0     | 1 | 33 |
| Vcam1         | -0.350 | 0.962 | 0.167 | 1 | 33 |
| Id1           | -0.451 | 0.231 | 0.167 | 1 | 33 |
| Insig1        | -0.291 | 0.962 | 0.167 | 1 | 33 |
| Abi3bp        | -0.298 | 0.231 | 0.167 | 1 | 33 |
| Dpysl3        | -0.382 | 0.962 | 0.167 | 1 | 33 |
| Apoe          | -0.524 | 0.962 | 0.167 | 1 | 33 |
| Chrdl1        | 0.302  | 0.942 | 0.167 | 1 | 33 |
| Pcolce        | -0.619 | 0.558 | 0.833 | 1 | 33 |



|          |        |       |       |   |    |
|----------|--------|-------|-------|---|----|
| Gbp4     | -0.294 | 0.942 | 0.167 | 1 | 33 |
| Lamb1    | 0.703  | 0.212 | 0     | 1 | 33 |
| Prex2    | 0.680  | 0.212 | 0     | 1 | 33 |
| Pltp     | 0.410  | 0.212 | 0     | 1 | 33 |
| Ppp1r14a | 0.403  | 0.212 | 0     | 1 | 33 |
| Vamp5    | -0.315 | 0.942 | 0.167 | 1 | 33 |
| Ccrl2    | -0.316 | 0.942 | 0.167 | 1 | 33 |
| Ifitm3   | -0.601 | 1     | 1     | 1 | 33 |
| Lgals1   | -1.211 | 0.769 | 0.833 | 1 | 33 |
| Bok      | 0.326  | 0.25  | 0.167 | 1 | 33 |
| Smtn     | 0.585  | 0.231 | 0     | 1 | 33 |
| Cxcl14   | 0.531  | 0.231 | 0     | 1 | 33 |
| Tesc     | 0.412  | 0.231 | 0     | 1 | 33 |
| Bmp4     | 0.364  | 0.231 | 0     | 1 | 33 |
| Tkt      | -0.341 | 0.308 | 0.333 | 1 | 33 |
| Tff1     | 0.952  | 1     | 0.667 | 1 | 33 |
| Aoc3     | -0.441 | 0.288 | 0.167 | 1 | 33 |
| Crispld2 | 0.263  | 0.462 | 0     | 1 | 33 |
| Jag1     | 0.308  | 0.25  | 0     | 1 | 33 |
| Gkn1     | 0.664  | 0.962 | 0.333 | 1 | 33 |
| Sod3     | -0.325 | 0.327 | 0.333 | 1 | 33 |
| Des      | -0.491 | 0.577 | 0.833 | 1 | 33 |
| Col3a1   | -0.730 | 0.731 | 1     | 1 | 33 |
| Tgfb1i1  | -0.598 | 0.423 | 0.5   | 1 | 33 |
| Rcn3     | -0.309 | 0.308 | 0.167 | 1 | 33 |
| Acot7    | -0.348 | 0.885 | 0.167 | 1 | 33 |
| Cavin3   | -0.406 | 0.346 | 0.333 | 1 | 33 |
| Sfrp1    | -1.109 | 0.885 | 0.167 | 1 | 33 |
| Ccdc80   | -0.511 | 0.423 | 0.5   | 1 | 33 |
| Ctgf     | 1.030  | 0.269 | 0     | 1 | 33 |
| Hamp2    | 0.458  | 0.731 | 0     | 1 | 33 |
| Ucp2     | 0.303  | 0.269 | 0     | 1 | 33 |
| Dpcr1    | 0.288  | 0.269 | 0     | 1 | 33 |
| Ltbp4    | -1.003 | 0.327 | 0.167 | 1 | 33 |
| Pgc      | 0.631  | 0.981 | 0.333 | 1 | 33 |
| Igfbp7   | -0.847 | 1     | 1     | 1 | 33 |
| Prr13    | 0.288  | 1     | 0.333 | 1 | 33 |
| Cxcl12   | -0.383 | 0.404 | 0.5   | 1 | 33 |
| Tuba1c   | 0.268  | 0.308 | 0.167 | 1 | 33 |
| Cdkn1a   | 0.354  | 1     | 0.333 | 1 | 33 |
| Gif      | 0.524  | 0.288 | 0     | 1 | 33 |
| Anxa3    | 0.508  | 0.288 | 0     | 1 | 33 |
| Tmem204  | 0.429  | 0.288 | 0.167 | 1 | 33 |
| Apold1   | 0.314  | 0.327 | 0.167 | 1 | 33 |
| Col18a1  | -0.823 | 0.346 | 0.167 | 1 | 33 |
| Rbp1     | 0.250  | 1     | 0.333 | 1 | 33 |
| Cygb     | -0.650 | 0.827 | 0.833 | 1 | 33 |
| Gm10260  | 0.379  | 0.327 | 0.167 | 1 | 33 |
| Agtr1a   | -0.406 | 0.385 | 0.333 | 1 | 33 |
| Igfbp5   | 0.405  | 1     | 0.333 | 1 | 33 |

|          |        |       |       |   |    |
|----------|--------|-------|-------|---|----|
| Serping1 | -0.429 | 0.769 | 0.667 | 1 | 33 |
| Krt8     | -0.261 | 1     | 0.333 | 1 | 33 |
| Col6a1   | -0.337 | 1     | 0.833 | 1 | 33 |
| Nrp1     | 0.454  | 0.308 | 0     | 1 | 33 |
| Dcn      | 0.302  | 0.962 | 0.333 | 1 | 33 |
| Ifi27    | -0.335 | 0.462 | 0.5   | 1 | 33 |
| Sparc    | -1.160 | 0.981 | 0.833 | 1 | 33 |
| Tagln    | 0.591  | 0.962 | 0.333 | 1 | 33 |
| Chst2    | -0.381 | 1     | 0.333 | 1 | 33 |
| AY036118 | 0.422  | 0.962 | 0.333 | 1 | 33 |
| Cryab    | -0.468 | 1     | 0.333 | 1 | 33 |
| Ctsl     | -0.326 | 0.519 | 0.5   | 1 | 33 |
| Gbp7     | -0.331 | 1     | 0.333 | 1 | 33 |
| Gm13889  | -0.621 | 1     | 0.833 | 1 | 33 |
| Serpine2 | -0.420 | 0.385 | 0.167 | 1 | 33 |
| Barx1    | -0.262 | 0.462 | 0.333 | 1 | 33 |
| Mt2      | -0.263 | 1     | 0.333 | 1 | 33 |
| Far1     | -0.293 | 1     | 0.333 | 1 | 33 |
| Ccl2     | -0.429 | 1     | 0.333 | 1 | 33 |
| Thbs1    | -0.438 | 1     | 0.333 | 1 | 33 |
| Socs1    | -0.536 | 1     | 0.333 | 1 | 33 |
| Ckb      | -0.390 | 0.481 | 0.5   | 1 | 33 |
| Slc43a3  | -0.422 | 1     | 0.333 | 1 | 33 |
| Irf8     | -0.691 | 1     | 0.333 | 1 | 33 |
| Aspn     | -0.276 | 0.5   | 0.5   | 1 | 33 |
| Higd1b   | -0.483 | 0.635 | 0.667 | 1 | 33 |
| Gm3839   | 0.546  | 0.327 | 0     | 1 | 33 |
| Fbn1     | -0.371 | 0.981 | 0.333 | 1 | 33 |
| Fstl1    | -0.384 | 0.462 | 0.333 | 1 | 33 |
| Sprr2a3  | -0.928 | 1     | 0.333 | 1 | 33 |
| Serpinh1 | -0.512 | 0.788 | 0.667 | 1 | 33 |
| Col1a2   | -0.419 | 0.923 | 0.833 | 1 | 33 |
| Lyar     | -0.302 | 0.962 | 0.333 | 1 | 33 |
| Igtp     | -0.501 | 1     | 0.333 | 1 | 33 |
| Mxra8    | -0.591 | 0.442 | 0.333 | 1 | 33 |
| Edem1    | -0.694 | 1     | 0.333 | 1 | 33 |
| Id2      | -0.898 | 1     | 0.333 | 1 | 33 |
| Gkn3     | -0.923 | 1     | 0.333 | 1 | 33 |
| Lst1     | -0.411 | 0.981 | 0.333 | 1 | 33 |
| Gm11808  | -0.311 | 1     | 0.333 | 1 | 33 |
| Ubd      | -0.408 | 1     | 0.333 | 1 | 33 |
| Gm4951   | -0.482 | 1     | 0.333 | 1 | 33 |
| Tnfaip3  | -0.487 | 1     | 0.333 | 1 | 33 |
| Ikzf2    | -0.565 | 1     | 0.333 | 1 | 33 |
| Gm12840  | -0.740 | 1     | 0.333 | 1 | 33 |
| Adamts4  | -1.112 | 1     | 0.333 | 1 | 33 |
| Gng11    | -0.738 | 0.827 | 0.667 | 1 | 33 |
| Tgfb1    | 0.449  | 0.308 | 0     | 1 | 33 |
| Ifi47    | -0.427 | 0.981 | 0.333 | 1 | 33 |
| Bgn      | -0.821 | 0.885 | 0.667 | 1 | 33 |

|          |        |       |       |   |    |
|----------|--------|-------|-------|---|----|
| Mfge8    | -1.135 | 0.981 | 0.833 | 1 | 33 |
| Gas1     | -0.453 | 0.981 | 0.333 | 1 | 33 |
| Rgs16    | -0.737 | 1     | 0.667 | 1 | 33 |
| Htra1    | -0.459 | 0.962 | 0.333 | 1 | 33 |
| Tinagl1  | -0.381 | 0.5   | 0.5   | 1 | 33 |
| Tmem100  | 0.655  | 0.346 | 0     | 1 | 33 |
| Snhg18   | -0.259 | 0.942 | 0.333 | 1 | 33 |
| Ethe1    | -0.503 | 0.962 | 0.333 | 1 | 33 |
| Tuba1b   | 0.452  | 0.962 | 0.5   | 1 | 33 |
| Ccl11    | -0.331 | 0.635 | 0.667 | 1 | 33 |
| mt-Nd3   | -0.504 | 1     | 0.667 | 1 | 33 |
| Igfbp3   | 0.251  | 0.385 | 0.167 | 1 | 33 |
| Chia1    | 0.457  | 0.904 | 0.333 | 1 | 33 |
| Ehd2     | -0.358 | 0.442 | 0.333 | 1 | 33 |
| Dnajb1   | 0.537  | 0.5   | 0.667 | 1 | 33 |
| Foxs1    | 0.389  | 0.423 | 0.333 | 1 | 33 |
| Dbnidd2  | -0.445 | 0.519 | 0.333 | 1 | 33 |
| Ednrb    | -0.449 | 1     | 0.667 | 1 | 33 |
| S100a6   | -0.297 | 1     | 0.833 | 1 | 33 |
| Id4      | -0.487 | 0.962 | 0.333 | 1 | 33 |
| Acvrl1   | 0.439  | 0.365 | 0.167 | 1 | 33 |
| Cdc42ep3 | -0.422 | 0.769 | 0.167 | 1 | 33 |
| Mmp23    | -0.274 | 0.942 | 0.333 | 1 | 33 |
| Flna     | 1.120  | 0.365 | 0.167 | 1 | 33 |
| S100a11  | -0.738 | 0.731 | 0.667 | 1 | 33 |
| Rpl23a   | -0.268 | 1     | 0.833 | 1 | 33 |
| Tipin    | 0.317  | 0.365 | 0     | 1 | 33 |
| Tcim     | -0.802 | 0.538 | 0.333 | 1 | 33 |
| Rgs5     | -0.746 | 0.981 | 1     | 1 | 33 |
| Lgals9   | 0.337  | 0.423 | 0.167 | 1 | 33 |
| Mgp      | -0.328 | 0.904 | 0.333 | 1 | 33 |
| Il34     | -0.511 | 0.788 | 0.667 | 1 | 33 |
| Tm4sf1   | -0.558 | 0.75  | 0.667 | 1 | 33 |
| Gimap6   | 0.676  | 0.385 | 0.167 | 1 | 33 |
| Hotairm1 | 0.279  | 0.404 | 0.167 | 1 | 33 |
| Rasl11a  | -0.439 | 0.885 | 0.667 | 1 | 33 |
| H2-K1    | -0.424 | 1     | 0.833 | 1 | 33 |
| Psca     | 0.740  | 0.692 | 0.167 | 1 | 33 |
| Ramp1    | -0.642 | 0.904 | 0.333 | 1 | 33 |
| Vim      | -0.478 | 0.577 | 0.5   | 1 | 33 |
| Atp4b    | 0.974  | 0.385 | 0     | 1 | 33 |
| Alkal2   | 0.816  | 0.385 | 0     | 1 | 33 |
| Cd200    | 0.690  | 0.385 | 0     | 1 | 33 |
| C1qtnf5  | 0.445  | 0.385 | 0     | 1 | 33 |
| Rasgrp2  | -0.963 | 0.577 | 0.333 | 1 | 33 |
| Fam162b  | -0.352 | 0.5   | 0.333 | 1 | 33 |
| Baiap3   | 0.793  | 0.115 | 0     | 1 | 33 |
| Atp5k    | -0.462 | 0.981 | 0.667 | 1 | 33 |
| Col1a1   | -0.270 | 0.558 | 0.333 | 1 | 33 |
| Cpe      | -1.075 | 0.904 | 0.333 | 1 | 33 |

|          |        |       |       |   |    |
|----------|--------|-------|-------|---|----|
| Dusp1    | 0.581  | 0.808 | 0.667 | 1 | 33 |
| Ly6e     | 0.265  | 0.5   | 0.333 | 1 | 33 |
| Tpm2     | 0.400  | 0.846 | 0.5   | 1 | 33 |
| Zfp36    | 0.600  | 0.788 | 0.667 | 1 | 33 |
| Emid1    | -0.390 | 0.596 | 0.333 | 1 | 33 |
| Cyba     | -0.373 | 0.808 | 0.667 | 1 | 33 |
| AW112010 | -0.744 | 1     | 0.667 | 1 | 33 |
| Tmsb10   | -0.352 | 0.923 | 0.833 | 1 | 33 |
| Eng      | 0.534  | 0.462 | 0.167 | 1 | 33 |
| Mgst3    | -0.456 | 0.788 | 0.667 | 1 | 33 |
| Tuba1a   | 0.409  | 0.981 | 0.667 | 1 | 33 |
| Irf1     | 0.517  | 1     | 0.5   | 1 | 33 |
| Ifitm1   | -0.749 | 0.962 | 0.833 | 1 | 33 |
| Cebpb    | 0.478  | 1     | 0.667 | 1 | 33 |
| Gadd45g  | 0.372  | 0.75  | 0.333 | 1 | 33 |
| Gja4     | -0.318 | 0.827 | 0.667 | 1 | 33 |
| Bcr      | 1.024  | 0.423 | 0     | 1 | 33 |
| Arl6ip1  | 0.495  | 0.423 | 0     | 1 | 33 |
| Fhl1     | -0.456 | 0.577 | 0.333 | 1 | 33 |
| Lars2    | 0.415  | 1     | 0.5   | 1 | 33 |
| Gucy1a1  | 0.267  | 0.865 | 0.667 | 1 | 33 |
| Sparcl1  | 0.344  | 1     | 0.833 | 1 | 33 |
| Crip2    | -0.423 | 0.865 | 0.833 | 1 | 33 |
| Mustn1   | 0.382  | 0.538 | 0.333 | 1 | 33 |
| Slbp     | -0.371 | 1     | 0.5   | 1 | 33 |
| Tcf21    | 0.817  | 0.558 | 0     | 1 | 33 |
| Pdlim3   | 0.806  | 0.442 | 0     | 1 | 33 |
| Kcne4    | -0.344 | 0.75  | 0.5   | 1 | 33 |
| Ndufa4l2 | -1.060 | 0.885 | 0.5   | 1 | 33 |
| Klf2     | 1.561  | 0.462 | 0.167 | 1 | 33 |
| Ltbp1    | -0.395 | 0.654 | 0.333 | 1 | 33 |
| Arhgdib  | -0.427 | 1     | 0.667 | 1 | 33 |
| Tagln2   | -0.302 | 0.808 | 0.5   | 1 | 33 |
| Nr4a1    | 1.372  | 0.481 | 0.5   | 1 | 33 |
| Gstm1    | -0.922 | 0.981 | 0.5   | 1 | 33 |
| Parm1    | 0.373  | 1     | 0.667 | 1 | 33 |
| Mylk     | 0.350  | 1     | 0.833 | 1 | 33 |
| Mt1      | 0.698  | 1     | 0.667 | 1 | 33 |
| Marcks1  | 0.657  | 0.462 | 0     | 1 | 33 |
| Heyl     | 0.351  | 0.538 | 0     | 1 | 33 |
| Esam     | 0.260  | 0.462 | 0     | 1 | 33 |
| Cfh      | -0.540 | 0.788 | 0.333 | 1 | 33 |
| Cyp4b1   | -0.579 | 1     | 0.5   | 1 | 33 |
| Tpm1     | 0.252  | 0.692 | 0.667 | 1 | 33 |
| Atf3     | 0.507  | 0.596 | 0.333 | 1 | 33 |
| Sox4     | -0.811 | 0.788 | 0.333 | 1 | 33 |
| Pdgfrb   | -0.587 | 0.808 | 0.667 | 1 | 33 |
| Palld    | -0.510 | 0.558 | 0.167 | 1 | 33 |
| Emp3     | -0.448 | 0.788 | 0.5   | 1 | 33 |
| S1pr3    | -0.496 | 1     | 0.5   | 1 | 33 |

|               |        |       |       |          |    |
|---------------|--------|-------|-------|----------|----|
| Tppp3         | -0.622 | 0.962 | 0.5   | 1        | 33 |
| Atp1b2        | -0.852 | 0.731 | 0.333 | 1        | 33 |
| Loxl2         | -0.258 | 1     | 0.5   | 1        | 33 |
| Serpina1b     | -1.153 | 1     | 0.5   | 1        | 33 |
| Timp3         | -0.614 | 1     | 0.833 | 1        | 33 |
| Tnxb          | -0.949 | 1     | 0.5   | 1        | 33 |
| 1810011H11Rik | 0.726  | 0.519 | 0.167 | 1        | 33 |
| Sncg          | -0.461 | 1     | 0.5   | 1        | 33 |
| Gm26825       | -0.429 | 1     | 0.5   | 1        | 33 |
| Neat1         | -0.835 | 0.981 | 0.5   | 1        | 33 |
| Steap4        | -0.736 | 0.942 | 0.5   | 1        | 33 |
| Cyr61         | 0.334  | 0.981 | 0.667 | 1        | 33 |
| Tff2          | -0.834 | 0.731 | 0.333 | 1        | 33 |
| Nid1          | -0.409 | 0.942 | 0.5   | 1        | 33 |
| Hmgb2         | -0.648 | 1     | 0.5   | 1        | 33 |
| Ly6a          | -0.786 | 1     | 0.5   | 1        | 33 |
| Kcnj8         | -0.787 | 0.885 | 0.5   | 1        | 33 |
| Gm26532       | 0.641  | 0.615 | 0.333 | 1        | 33 |
| Enpp2         | -0.951 | 1     | 0.5   | 1        | 33 |
| Col6a3        | -0.816 | 0.981 | 0.5   | 1        | 33 |
| Id3           | 0.259  | 0.808 | 0.667 | 1        | 33 |
| Anxa1         | -0.276 | 1     | 0.667 | 1        | 33 |
| 04-Sep        | -0.325 | 0.808 | 0.5   | 1        | 33 |
| Ifrd1         | -0.252 | 0.865 | 0.5   | 1        | 33 |
| Tk1           | -0.409 | 1     | 0.5   | 1        | 33 |
| Fabp1         | 4.660  | 1     | 0     | 9.84E-09 | 34 |
| Hsd17b6       | 1.317  | 1     | 0     | 9.84E-09 | 34 |
| Iigp1         | 1.053  | 1     | 0     | 9.84E-09 | 34 |
| Ubd           | 0.661  | 1     | 0     | 9.84E-09 | 34 |
| Dmbt1         | 0.387  | 1     | 0     | 9.84E-09 | 34 |
| Cox7a1        | 0.377  | 1     | 0     | 9.84E-09 | 34 |
| Ido1          | 0.320  | 1     | 0     | 9.84E-09 | 34 |
| Umod          | 0.257  | 1     | 0     | 9.84E-09 | 34 |
| Gcnt3         | 0.254  | 1     | 0     | 9.84E-09 | 34 |
| Lyz2          | 1.478  | 0.952 | 0     | 5.11E-08 | 34 |
| Ecscr         | -0.628 | 0     | 0.125 | 7.84E-08 | 34 |
| Bicc1         | -0.632 | 0     | 0.125 | 7.84E-08 | 34 |
| Lgals9        | 2.116  | 1     | 0.031 | 1.65E-07 | 34 |
| Serping1      | 1.333  | 1     | 0.031 | 1.65E-07 | 34 |
| Atp4a         | 1.818  | 1     | 0.031 | 2.16E-07 | 34 |
| Car3          | 4.636  | 0.905 | 0     | 2.51E-07 | 34 |
| Apoa2         | 4.354  | 0.905 | 0     | 2.51E-07 | 34 |
| Apoc3         | 4.123  | 0.905 | 0     | 2.51E-07 | 34 |
| Ctss          | 0.866  | 0.905 | 0     | 2.51E-07 | 34 |
| Muc5ac        | 0.854  | 1     | 0.031 | 2.83E-07 | 34 |
| Ube2c         | 0.666  | 1     | 0.031 | 2.83E-07 | 34 |
| Ctse          | 0.587  | 1     | 0.031 | 2.83E-07 | 34 |
| Insig1        | 0.349  | 1     | 0.031 | 2.83E-07 | 34 |
| Cd68          | 0.277  | 1     | 0.031 | 2.83E-07 | 34 |
| Igtp          | 0.280  | 1     | 0.031 | 3.23E-07 | 34 |

|           |        |       |       |             |    |
|-----------|--------|-------|-------|-------------|----|
| Apoa1     | 3.475  | 1     | 0.188 | 7.52E-07    | 34 |
| Cxcl17    | 0.583  | 0.952 | 0     | 8.26E-07    | 34 |
| Vsig1     | 0.539  | 0.952 | 0     | 8.26E-07    | 34 |
| Cald1     | 1.053  | 0.952 | 0.031 | 8.82E-07    | 34 |
| Cd74      | 2.350  | 1     | 0.219 | 1.01E-06    | 34 |
| Hpx       | 3.489  | 0.857 | 0     | 1.16E-06    | 34 |
| Hamp      | 2.590  | 0.857 | 0     | 1.16E-06    | 34 |
| Wfdc17    | 0.277  | 0.857 | 0     | 1.16E-06    | 34 |
| Gsta3     | 2.424  | 1     | 0.094 | 1.33E-06    | 34 |
| Mylk      | -0.298 | 0.952 | 0.031 | 1.49E-06    | 34 |
| Rbp4      | 3.647  | 0.905 | 0.062 | 1.59E-06    | 34 |
| Phgdh     | -0.377 | 0.048 | 0.156 | 3.45E-06    | 34 |
| Cited2    | -0.767 | 0.048 | 0.156 | 3.45E-06    | 34 |
| Nr0b2     | 1.239  | 0.905 | 0     | 3.90E-06    | 34 |
| AW112010  | 0.877  | 1     | 0.062 | 3.97E-06    | 34 |
| Ly6c2     | 0.500  | 0.81  | 0     | 5.12E-06    | 34 |
| Flna      | -0.791 | 0.048 | 0.25  | 5.46E-06    | 34 |
| Cp        | -1.491 | 0.048 | 0.25  | 5.46E-06    | 34 |
| Rarres2   | 0.594  | 0.905 | 0.031 | 5.72E-06    | 34 |
| Irgm1     | 0.277  | 1     | 0.062 | 5.75E-06    | 34 |
| Pga5      | 0.260  | 1     | 0.062 | 5.75E-06    | 34 |
| Adamts1   | -0.430 | 0     | 0.156 | 6.11E-06    | 34 |
| Serpinb1a | 0.365  | 1     | 0.062 | 7.34E-06    | 34 |
| Sst       | -0.289 | 1     | 0.062 | 7.34E-06    | 34 |
| Cldn10    | -0.540 | 1     | 0.062 | 7.34E-06    | 34 |
| Igfbp7    | -1.356 | 0.048 | 0.375 | 7.38E-06    | 34 |
| Gstp1     | 3.448  | 1     | 0.375 | 1.16E-05    | 34 |
| Rdx       | -0.313 | 0.048 | 0.125 | 1.20E-05    | 34 |
| Irf7      | -0.414 | 0.952 | 0.031 | 1.64E-05    | 34 |
| Serpina3k | 4.615  | 0.857 | 0     | 1.74E-05    | 34 |
| Mup3      | 4.330  | 0.857 | 0     | 1.74E-05    | 34 |
| H2-Eb1    | 1.553  | 1     | 0.125 | 1.89E-05    | 34 |
| Hpd       | 2.968  | 0.762 | 0     | 2.14E-05    | 34 |
| Apoh      | 2.660  | 0.762 | 0     | 2.14E-05    | 34 |
| Cpn1      | 0.799  | 0.905 | 0     | 4.54E-05    | 34 |
| Tgm2      | 0.693  | 1     | 0.094 | 6.12E-05    | 34 |
| Ahsg      | 3.464  | 0.762 | 0.031 | 6.41E-05    | 34 |
| H2-Ab1    | 1.241  | 1     | 0.125 | 7.42E-05    | 34 |
| Tinagl1   | -0.430 | 0.095 | 0.125 | 7.42E-05    | 34 |
| Gadd45b   | -0.636 | 0.095 | 0.125 | 7.42E-05    | 34 |
| Selenom   | -0.715 | 0.095 | 0.125 | 7.42E-05    | 34 |
| Adh7      | -1.240 | 0.095 | 0.25  | 8.09E-05    | 34 |
| Hmgn2     | -0.930 | 0.095 | 0.219 | 8.16E-05    | 34 |
| Fgg       | 3.309  | 0.714 | 0     | 8.49E-05    | 34 |
| Serpina1b | 3.035  | 0.714 | 0     | 8.49E-05    | 34 |
| Apoc4     | 3.018  | 0.714 | 0     | 8.49E-05    | 34 |
| Hp        | 2.850  | 0.714 | 0     | 8.49E-05    | 34 |
| Wars      | 0.629  | 1     | 0.094 | 8.59E-05    | 34 |
| Alb       | 3.557  | 0.905 | 0.125 | 9.61E-05    | 34 |
| Acot7     | -0.809 | 0.095 | 0.188 | 0.000100469 | 34 |

|               |        |       |       |             |    |
|---------------|--------|-------|-------|-------------|----|
| Lig1          | -0.328 | 1     | 0.094 | 0.000120109 | 34 |
| Rtl8a         | -0.348 | 1     | 0.094 | 0.000120109 | 34 |
| Col4a5        | -0.432 | 1     | 0.094 | 0.000120109 | 34 |
| Cryab         | -0.459 | 1     | 0.094 | 0.000120109 | 34 |
| Sftpd         | -0.548 | 1     | 0.094 | 0.000120109 | 34 |
| Ptgds         | -0.551 | 1     | 0.094 | 0.000120109 | 34 |
| Neurl3        | -0.720 | 1     | 0.094 | 0.000120109 | 34 |
| Prdx1         | 1.380  | 1     | 0.719 | 0.000158848 | 34 |
| S100a4        | -0.319 | 0.952 | 0.062 | 0.000212626 | 34 |
| Cldn4         | -0.918 | 0.095 | 0.375 | 0.000232325 | 34 |
| Isg15         | -1.061 | 0.952 | 0.062 | 0.000237393 | 34 |
| Hpgd          | -0.604 | 0.095 | 0.125 | 0.000259152 | 34 |
| Plp1          | -0.284 | 0.857 | 0.031 | 0.000270853 | 34 |
| Ttr           | 3.056  | 0.905 | 0.156 | 0.000319454 | 34 |
| Mup20         | 2.934  | 0.667 | 0     | 0.000321708 | 34 |
| H2-Aa         | 1.264  | 1     | 0.188 | 0.000361475 | 34 |
| Laptm5        | -0.369 | 0.762 | 0.031 | 0.000397125 | 34 |
| Rrad          | -0.454 | 0.762 | 0.031 | 0.000397125 | 34 |
| AA467197      | -0.865 | 0.952 | 0.094 | 0.000432123 | 34 |
| Muc6          | 0.557  | 1     | 0.188 | 0.000493782 | 34 |
| Anxa2         | -1.500 | 0.143 | 0.719 | 0.000521849 | 34 |
| Spdef         | -0.265 | 0.905 | 0.031 | 0.000568693 | 34 |
| Ppp1r15a      | -1.145 | 0.143 | 0.5   | 0.000621143 | 34 |
| Gstp2         | 0.835  | 1     | 0.125 | 0.000713584 | 34 |
| Nupr1         | -2.518 | 0.143 | 0.312 | 0.000732421 | 34 |
| Smim6         | 0.457  | 1     | 0.125 | 0.000791539 | 34 |
| B930036N10Rik | -0.462 | 0.905 | 0.062 | 0.000873435 | 34 |
| H2-T23        | 0.261  | 1     | 0.125 | 0.000972831 | 34 |
| Dgat2         | 0.702  | 0.952 | 0.094 | 0.00102838  | 34 |
| Palld         | -0.712 | 0.143 | 0.281 | 0.001038724 | 34 |
| Bpifb1        | 0.523  | 1     | 0.125 | 0.001077893 | 34 |
| Mup7          | 2.839  | 0.619 | 0     | 0.001165096 | 34 |
| Wfdc21        | 2.711  | 0.619 | 0     | 0.001165096 | 34 |
| Fgb           | 2.533  | 0.619 | 0     | 0.001165096 | 34 |
| Cebpd         | -0.970 | 0.143 | 0.156 | 0.001354989 | 34 |
| Dbnnd2        | 0.451  | 0.952 | 0.094 | 0.00140056  | 34 |
| Ccdc34        | 0.447  | 0.952 | 0.094 | 0.00140056  | 34 |
| Igsf9         | -0.409 | 1     | 0.125 | 0.001462893 | 34 |
| Ddit4         | -0.421 | 1     | 0.125 | 0.001462893 | 34 |
| Mxd1          | -0.658 | 1     | 0.125 | 0.001462893 | 34 |
| Slc6a14       | -0.734 | 1     | 0.125 | 0.001462893 | 34 |
| Icam1         | -0.864 | 1     | 0.125 | 0.001462893 | 34 |
| Parm1         | -0.473 | 0.143 | 0.094 | 0.001551263 | 34 |
| Bex1          | -0.615 | 0.143 | 0.094 | 0.001551263 | 34 |
| Slco2a1       | -0.291 | 0.143 | 0.062 | 0.001613308 | 34 |
| Hist2h2aa1    | -0.334 | 0.143 | 0.125 | 0.00161845  | 34 |
| Kcne2         | 0.461  | 0.143 | 0     | 0.001634061 | 34 |
| Fabp3         | -0.362 | 0.143 | 0     | 0.001634061 | 34 |
| Sult1c2       | -0.386 | 0.143 | 0.031 | 0.001642665 | 34 |
| Ifit1         | -0.495 | 0.143 | 0.031 | 0.001642665 | 34 |

|               |        |       |       |             |    |
|---------------|--------|-------|-------|-------------|----|
| Tnni3         | -0.552 | 0.143 | 0.031 | 0.001642665 | 34 |
| Krt7          | -0.632 | 0.143 | 0.219 | 0.001814842 | 34 |
| Car2          | -0.638 | 0.143 | 0.188 | 0.002027271 | 34 |
| Ethe1         | 1.215  | 0.952 | 0.125 | 0.002186665 | 34 |
| Cfb           | 1.279  | 0.905 | 0.062 | 0.002427696 | 34 |
| Bcr           | -0.328 | 0.952 | 0.094 | 0.002571079 | 34 |
| 8430408G22Rik | -0.496 | 0.952 | 0.094 | 0.002571079 | 34 |
| Nqo1          | -0.285 | 0.143 | 0.312 | 0.002849108 | 34 |
| Ets1          | -0.333 | 0.952 | 0.125 | 0.004655435 | 34 |
| Akr1b8        | -0.649 | 0.143 | 0.094 | 0.005136429 | 34 |
| Apoc1         | 1.840  | 0.952 | 0.438 | 0.005136756 | 34 |
| Fbp1          | 2.402  | 0.619 | 0.031 | 0.005191147 | 34 |
| Tbc1d4        | -0.371 | 0.905 | 0.062 | 0.005395364 | 34 |
| Tagln2        | -1.156 | 0.19  | 0.562 | 0.00547927  | 34 |
| Mgll          | 0.741  | 0.143 | 0     | 0.006144657 | 34 |
| Ucp2          | -1.101 | 0.19  | 0.594 | 0.006251634 | 34 |
| S100a10       | -1.018 | 0.19  | 0.469 | 0.006618744 | 34 |
| Slc40a1       | 0.807  | 0.143 | 0.031 | 0.007218447 | 34 |
| S100a13       | -0.922 | 0.19  | 0.281 | 0.009185391 | 34 |
| Adh1          | 1.400  | 0.857 | 0.031 | 0.010024518 | 34 |
| Smc4          | 0.815  | 0.857 | 0.031 | 0.011042312 | 34 |
| Fga           | 2.885  | 0.571 | 0.031 | 0.013384813 | 34 |
| Tnfrsf3       | -0.395 | 1     | 0.156 | 0.013639436 | 34 |
| H2afx         | -0.449 | 1     | 0.156 | 0.013639436 | 34 |
| S100a1        | 1.122  | 1     | 0.219 | 0.01438708  | 34 |
| Cdkn1a        | -0.520 | 0.19  | 0.312 | 0.014799026 | 34 |
| Anxa3         | -0.521 | 0.19  | 0.25  | 0.015142875 | 34 |
| Pdlim1        | -0.593 | 0.19  | 0.281 | 0.018778741 | 34 |
| Psmb8         | 0.904  | 1     | 0.188 | 0.019353043 | 34 |
| Msmo1         | -0.320 | 0.19  | 0.188 | 0.025286329 | 34 |
| Pttg1         | -0.482 | 0.19  | 0.094 | 0.025454971 | 34 |
| Bst2          | 1.290  | 0.905 | 0.125 | 0.025772399 | 34 |
| Rps2          | -1.032 | 0.333 | 0.844 | 0.026368765 | 34 |
| Ambp          | 0.801  | 1     | 0.219 | 0.02681582  | 34 |
| Apoe          | 1.609  | 0.905 | 0.594 | 0.027111169 | 34 |
| Pigr          | 0.756  | 1     | 0.188 | 0.027623934 | 34 |
| Anxa10        | -0.742 | 0.19  | 0.062 | 0.029707197 | 34 |
| Mgst2         | 0.427  | 0.905 | 0.094 | 0.030510693 | 34 |
| Oasl1         | -0.346 | 0.19  | 0.031 | 0.034163781 | 34 |
| Ldhb          | -0.769 | 0.19  | 0.031 | 0.034163781 | 34 |
| Fxyd1         | 0.312  | 1     | 0.188 | 0.03593752  | 34 |
| Gc            | 3.201  | 0.667 | 0     | 0.036240648 | 34 |
| Fabp5         | -1.687 | 0.238 | 0.469 | 0.037246174 | 34 |
| Gstm6         | 0.727  | 0.81  | 0     | 0.03867926  | 34 |
| Ces2c         | 0.472  | 0.19  | 0     | 0.03867926  | 34 |
| Fkbp11        | 0.269  | 0.19  | 0     | 0.03867926  | 34 |
| Cdkn1c        | -0.549 | 0.905 | 0.094 | 0.039924244 | 34 |
| Creld2        | 1.199  | 0.857 | 0.062 | 0.042666132 | 34 |
| Mup12         | 2.590  | 0.476 | 0     | 0.043011055 | 34 |
| Sptssb        | 0.973  | 0.857 | 0.062 | 0.051013621 | 34 |



|               |        |       |       |             |    |
|---------------|--------|-------|-------|-------------|----|
| Krt5          | -2.302 | 0.095 | 0.688 | 0.052064429 | 34 |
| Gif           | 1.709  | 0.905 | 0.219 | 0.053482242 | 34 |
| 2210407C18Rik | 1.292  | 1     | 0.219 | 0.058209748 | 34 |
| Igfbp4        | 2.972  | 0.81  | 0.031 | 0.058819842 | 34 |
| Gm11361       | -0.297 | 1     | 0.188 | 0.071349046 | 34 |
| Pgd           | -0.356 | 1     | 0.188 | 0.071349046 | 34 |
| Itih3         | 0.908  | 0.143 | 0     | 0.073627582 | 34 |
| Serpina1c     | 0.731  | 0.143 | 0     | 0.073627582 | 34 |
| Malat1        | -1.745 | 1     | 0.969 | 0.083115534 | 34 |
| Ovol1         | -0.519 | 0.905 | 0.156 | 0.087642583 | 34 |
| Klf2          | -0.393 | 1     | 0.188 | 0.099671813 | 34 |
| Spink4        | -0.498 | 1     | 0.188 | 0.099671813 | 34 |
| Thbs1         | -0.616 | 1     | 0.188 | 0.099671813 | 34 |
| Pla2g1b       | 1.070  | 1     | 0.688 | 0.106264716 | 34 |
| Hspb1         | -0.873 | 0.238 | 0.5   | 0.112031527 | 34 |
| Mcm6          | -0.369 | 0.857 | 0.094 | 0.116718449 | 34 |
| Rassf9        | -0.449 | 0.857 | 0.094 | 0.116718449 | 34 |
| Fdps          | 1.380  | 0.905 | 0.156 | 0.120795176 | 34 |
| Tpm1          | -0.592 | 0.238 | 0.25  | 0.126861863 | 34 |
| Cldn7         | -0.927 | 0.238 | 0.312 | 0.129748526 | 34 |
| Bhmt          | 2.227  | 0.429 | 0     | 0.132610897 | 34 |
| Serpinc1      | 2.081  | 0.429 | 0     | 0.132610897 | 34 |
| Mt2           | -1.961 | 0.381 | 0.562 | 0.141571654 | 34 |
| Chka          | -0.378 | 0.952 | 0.156 | 0.142415949 | 34 |
| Gkn2          | 1.428  | 0.952 | 0.469 | 0.170280016 | 34 |
| Ces1f         | 0.760  | 0.19  | 0.094 | 0.177933806 | 34 |
| Oxct1         | -0.523 | 0.238 | 0.281 | 0.178248063 | 34 |
| Pgc           | 1.448  | 0.952 | 0.688 | 0.181797363 | 34 |
| Dusp1         | -1.975 | 1     | 0.844 | 0.19063025  | 34 |
| Fcgrt         | 0.298  | 0.81  | 0.062 | 0.214985291 | 34 |
| Mt1           | -1.565 | 0.429 | 0.75  | 0.216926304 | 34 |
| Plau          | -0.456 | 0.952 | 0.188 | 0.250539931 | 34 |
| Chil4         | -1.896 | 0.952 | 0.188 | 0.250539931 | 34 |
| Adm           | -0.411 | 0.238 | 0.094 | 0.303636694 | 34 |
| Mllt3         | 0.536  | 0.952 | 0.188 | 0.307017567 | 34 |
| Areg          | -0.724 | 1     | 0.219 | 0.317790831 | 34 |
| Cbr3          | -0.277 | 0.238 | 0.062 | 0.386093466 | 34 |
| Elovl3        | 2.088  | 0.381 | 0     | 0.394953567 | 34 |
| Sult2a8       | 1.992  | 0.381 | 0     | 0.394953567 | 34 |
| Itih4         | 1.145  | 0.714 | 0     | 0.398909909 | 34 |
| Igfbp2        | 0.514  | 0.19  | 0.094 | 0.448423894 | 34 |
| Cyp2d9        | 2.516  | 0.476 | 0     | 0.463951119 | 34 |
| Rgs5          | -0.750 | 0.714 | 0.062 | 0.471401939 | 34 |
| Clps          | 0.881  | 1     | 0.75  | 0.519911825 | 34 |
| Cym           | 0.271  | 1     | 0.312 | 0.521351444 | 34 |
| Trf           | 1.237  | 0.238 | 0.031 | 0.568920738 | 34 |
| Gjb1          | 0.560  | 0.238 | 0.031 | 0.568920738 | 34 |
| St3gal4       | -0.639 | 1     | 0.219 | 0.582460896 | 34 |
| Cd14          | -0.814 | 1     | 0.219 | 0.582460896 | 34 |
| Hist1h2bc     | 0.918  | 0.238 | 0.031 | 0.665443559 | 34 |

|               |        |       |       |             |    |
|---------------|--------|-------|-------|-------------|----|
| C3            | -0.382 | 0.952 | 0.219 | 0.681896318 | 34 |
| Ltbp4         | -0.556 | 0.952 | 0.188 | 0.761797753 | 34 |
| Ghrl          | 1.001  | 0.952 | 0.219 | 0.781961662 | 34 |
| Cldn3         | -0.375 | 0.286 | 0.375 | 0.79330098  | 34 |
| Gm3839        | 0.612  | 0.238 | 0.062 | 0.840661616 | 34 |
| Serpina1a     | 1.664  | 0.333 | 0     | 1           | 34 |
| Cyp3a25       | 1.541  | 0.333 | 0     | 1           | 34 |
| Ccl9          | 1.266  | 0.333 | 0     | 1           | 34 |
| Serpina3n     | 1.009  | 0.19  | 0     | 1           | 34 |
| Aqp3          | -0.565 | 0.952 | 0.219 | 1           | 34 |
| Cd302         | 2.081  | 0.429 | 0     | 1           | 34 |
| Nrarp         | -0.501 | 0.81  | 0.125 | 1           | 34 |
| 2200002D01Rik | -0.460 | 1     | 0.25  | 1           | 34 |
| Pid1          | 1.583  | 0.381 | 0.031 | 1           | 34 |
| Hsd17b2       | 1.441  | 0.238 | 0     | 1           | 34 |
| Nrep          | 0.592  | 0.714 | 0     | 1           | 34 |
| Tst           | 0.961  | 0.905 | 0.25  | 1           | 34 |
| Bgn           | -0.252 | 0.714 | 0.062 | 1           | 34 |
| Nr4a2         | -1.046 | 0.857 | 0.125 | 1           | 34 |
| Acsl1         | 0.731  | 0.81  | 0.094 | 1           | 34 |
| Rps29         | -0.650 | 1     | 1     | 1           | 34 |
| Sox9          | -0.551 | 1     | 0.25  | 1           | 34 |
| Krt15         | -1.301 | 0.095 | 0.594 | 1           | 34 |
| Nr4a3         | -0.903 | 0.714 | 0.125 | 1           | 34 |
| Socs3         | -1.086 | 1     | 0.25  | 1           | 34 |
| Pon1          | 1.610  | 0.286 | 0     | 1           | 34 |
| Hes1          | -1.222 | 0.381 | 0.406 | 1           | 34 |
| Ifitm1        | -2.031 | 0.143 | 0.406 | 1           | 34 |
| Mfge8         | -1.300 | 0.381 | 0.375 | 1           | 34 |
| Tff1          | 0.880  | 1     | 0.688 | 1           | 34 |
| Hmgb2         | -0.511 | 0.952 | 0.219 | 1           | 34 |
| Epas1         | -0.282 | 0.19  | 0.094 | 1           | 34 |
| Cavin1        | -0.492 | 0.333 | 0.219 | 1           | 34 |
| Krt14         | -2.784 | 0.095 | 0.469 | 1           | 34 |
| F10           | 1.254  | 0.238 | 0     | 1           | 34 |
| Agr2          | 0.379  | 0.286 | 0.188 | 1           | 34 |
| Glipr1        | -0.538 | 0.667 | 0.094 | 1           | 34 |
| S100a11       | -1.348 | 1     | 0.812 | 1           | 34 |
| Serpinf1      | 2.140  | 0.524 | 0     | 1           | 34 |
| Igfbp3        | -0.721 | 0.333 | 0.219 | 1           | 34 |
| Prnp          | -0.637 | 0.333 | 0.188 | 1           | 34 |
| Cfi           | 0.395  | 0.286 | 0     | 1           | 34 |
| Col17a1       | -1.468 | 0     | 0.344 | 1           | 34 |
| Plip          | 0.565  | 0.762 | 0.062 | 1           | 34 |
| Itln1         | -0.332 | 0.429 | 0.062 | 1           | 34 |
| Neat1         | -0.929 | 1     | 0.812 | 1           | 34 |
| Tm4sf4        | -1.303 | 1     | 0.281 | 1           | 34 |
| Wnt5a         | -0.427 | 0.571 | 0.062 | 1           | 34 |
| Col18a1       | 0.354  | 0.333 | 0.031 | 1           | 34 |
| Gkn1          | 1.280  | 0.857 | 0.594 | 1           | 34 |

|         |        |       |       |   |    |
|---------|--------|-------|-------|---|----|
| Rpl17   | -1.128 | 1     | 0.844 | 1 | 34 |
| Akr1c6  | 2.117  | 0.429 | 0     | 1 | 34 |
| Jag1    | -0.315 | 0.952 | 0.25  | 1 | 34 |
| Mup17   | 1.557  | 0.238 | 0     | 1 | 34 |
| Cyp2c67 | 1.515  | 0.238 | 0     | 1 | 34 |
| Tdo2    | 1.224  | 0.238 | 0     | 1 | 34 |
| Cd300c2 | 0.681  | 0.238 | 0     | 1 | 34 |
| Vamp5   | -0.372 | 0.714 | 0.156 | 1 | 34 |
| Ube2s   | -0.602 | 0.381 | 0.281 | 1 | 34 |
| Cxcl12  | 0.767  | 0.238 | 0.062 | 1 | 34 |
| Ugdh    | -0.451 | 0.952 | 0.25  | 1 | 34 |
| Gm26825 | -0.520 | 0.81  | 0.125 | 1 | 34 |
| Ifi27   | 1.009  | 0.952 | 0.281 | 1 | 34 |
| Sirpa   | -0.329 | 0.143 | 0.156 | 1 | 34 |
| Stmn1   | -0.872 | 0.905 | 0.219 | 1 | 34 |
| Pkp1    | -0.939 | 0.095 | 0.406 | 1 | 34 |
| Gsdma2  | 0.359  | 0.714 | 0.031 | 1 | 34 |
| Tspan6  | -0.427 | 0.095 | 0.188 | 1 | 34 |
| Tpm2    | -0.480 | 0.381 | 0.219 | 1 | 34 |
| Tff2    | 0.709  | 0.952 | 0.375 | 1 | 34 |
| Tubb5   | -0.499 | 1     | 0.312 | 1 | 34 |
| Pcna    | -0.327 | 0.762 | 0.094 | 1 | 34 |
| Cyp2c29 | 1.856  | 0.19  | 0     | 1 | 34 |
| Cpb2    | 1.357  | 0.19  | 0     | 1 | 34 |
| Thrsp   | 0.821  | 0.19  | 0     | 1 | 34 |
| Rps15   | -0.406 | 1     | 0.938 | 1 | 34 |
| Ecm1    | -1.524 | 0.143 | 0.188 | 1 | 34 |
| Edn1    | -0.303 | 0.333 | 0.125 | 1 | 34 |
| H2-K1   | 1.188  | 1     | 0.594 | 1 | 34 |
| Trp63   | -1.099 | 0.095 | 0.375 | 1 | 34 |
| Phlda1  | -0.724 | 0.476 | 0.594 | 1 | 34 |
| Car8    | 0.589  | 0.333 | 0.062 | 1 | 34 |
| Cst3    | 0.592  | 1     | 0.406 | 1 | 34 |
| Ikzf2   | -0.733 | 1     | 0.312 | 1 | 34 |
| Lgals7  | -2.398 | 0.238 | 0.438 | 1 | 34 |
| Capg    | -0.447 | 0.905 | 0.25  | 1 | 34 |
| Lrg1    | 1.112  | 0.286 | 0     | 1 | 34 |
| Tacstd2 | -0.901 | 0.095 | 0.406 | 1 | 34 |
| Bcam    | -0.756 | 0.952 | 0.281 | 1 | 34 |
| Spp1    | -3.361 | 0.952 | 0.281 | 1 | 34 |
| Zfp36   | -1.272 | 1     | 0.75  | 1 | 34 |
| S100a6  | -1.151 | 0.857 | 0.75  | 1 | 34 |
| Angptl8 | 1.394  | 0.333 | 0     | 1 | 34 |
| Hbb-bs  | 1.120  | 0.333 | 0     | 1 | 34 |
| Snhg18  | -1.153 | 0.429 | 0.25  | 1 | 34 |
| Cpe     | -0.708 | 0.952 | 0.312 | 1 | 34 |
| C1ra    | 1.187  | 0.476 | 0     | 1 | 34 |
| Nr4a1   | -1.899 | 1     | 0.688 | 1 | 34 |
| Myc     | -0.664 | 0.762 | 0.125 | 1 | 34 |
| Gm42418 | 0.815  | 1     | 0.906 | 1 | 34 |

|          |        |       |       |   |    |
|----------|--------|-------|-------|---|----|
| Mgst3    | 0.952  | 1     | 0.438 | 1 | 34 |
| Ddc      | 0.735  | 0.143 | 0     | 1 | 34 |
| G0s2     | 0.606  | 0.143 | 0     | 1 | 34 |
| Il1b     | 0.501  | 0.143 | 0     | 1 | 34 |
| Id3      | 0.494  | 1     | 0.438 | 1 | 34 |
| Tuba1c   | -0.616 | 0.81  | 0.188 | 1 | 34 |
| Cyba     | -0.664 | 1     | 0.344 | 1 | 34 |
| Maff     | -0.758 | 1     | 0.344 | 1 | 34 |
| Ly6e     | 0.412  | 1     | 0.406 | 1 | 34 |
| Gm26917  | -0.475 | 1     | 0.344 | 1 | 34 |
| Atf3     | -1.138 | 1     | 0.75  | 1 | 34 |
| Rpl23a   | -0.911 | 1     | 0.75  | 1 | 34 |
| Gsta4    | 0.266  | 1     | 0.469 | 1 | 34 |
| Cbr2     | -1.280 | 0.095 | 0.312 | 1 | 34 |
| Vtn      | 2.117  | 0.571 | 0.031 | 1 | 34 |
| Sfn      | -1.201 | 1     | 0.719 | 1 | 34 |
| Ly6a     | -0.429 | 0.952 | 0.375 | 1 | 34 |
| Ctgf     | -1.249 | 0.143 | 0.156 | 1 | 34 |
| Sox7     | -0.373 | 0     | 0.156 | 1 | 34 |
| Hotairm1 | -0.392 | 0     | 0.156 | 1 | 34 |
| Mt4      | -2.966 | 0     | 0.156 | 1 | 34 |
| Sgk1     | -0.705 | 0.857 | 0.25  | 1 | 34 |
| Anxa8    | -0.835 | 0.143 | 0.344 | 1 | 34 |
| Krt16    | -1.013 | 0.048 | 0.188 | 1 | 34 |
| Cybb     | -0.380 | 0.381 | 0.125 | 1 | 34 |
| Dmkn     | -1.004 | 0.095 | 0.281 | 1 | 34 |
| Krt19    | -0.324 | 0.524 | 0.344 | 1 | 34 |
| Zfp3612  | -0.667 | 0.952 | 0.344 | 1 | 34 |
| Nfe2l2   | -0.684 | 1     | 0.375 | 1 | 34 |
| Krt6a    | -1.156 | 0.095 | 0.281 | 1 | 34 |
| Ltf      | -2.404 | 0.095 | 0.281 | 1 | 34 |
| Mal      | -0.665 | 0.714 | 0.125 | 1 | 34 |
| Dnajb1   | -0.829 | 1     | 0.75  | 1 | 34 |
| Ndufa4l2 | -0.338 | 0     | 0.125 | 1 | 34 |
| Cyp26b1  | -0.413 | 0     | 0.125 | 1 | 34 |
| Gpnmb    | -0.467 | 0     | 0.125 | 1 | 34 |
| Serpinb2 | -0.477 | 0     | 0.125 | 1 | 34 |
| Cyp4v3   | 0.820  | 0.381 | 0     | 1 | 34 |
| Il18     | 0.297  | 0.381 | 0     | 1 | 34 |
| Igf1     | 1.859  | 0.381 | 0.031 | 1 | 34 |
| Marcksl1 | -0.785 | 1     | 0.375 | 1 | 34 |
| Lars2    | -0.326 | 1     | 0.406 | 1 | 34 |
| Csrp1    | -0.690 | 1     | 0.375 | 1 | 34 |
| Trim29   | -0.645 | 0.095 | 0.25  | 1 | 34 |
| Gsn      | -0.533 | 0.762 | 0.188 | 1 | 34 |
| Agt      | 0.679  | 0.143 | 0.031 | 1 | 34 |
| Lbp      | 0.602  | 0.143 | 0.031 | 1 | 34 |
| Hspg2    | -0.508 | 0.429 | 0.094 | 1 | 34 |
| Nat8f1   | 1.444  | 0.619 | 0.031 | 1 | 34 |
| Lgals2   | 0.328  | 0.476 | 0.25  | 1 | 34 |

|           |        |       |       |   |    |
|-----------|--------|-------|-------|---|----|
| Lypd3     | -0.862 | 0.095 | 0.25  | 1 | 34 |
| Arc       | -0.851 | 0.762 | 0.25  | 1 | 34 |
| Il1rn     | -0.414 | 0.524 | 0.219 | 1 | 34 |
| Rgs2      | -0.416 | 0.238 | 0.094 | 1 | 34 |
| Smoc2     | -0.517 | 0.048 | 0.125 | 1 | 34 |
| Lgals3    | -0.760 | 0.952 | 0.406 | 1 | 34 |
| Ly6d      | -0.849 | 0.952 | 0.406 | 1 | 34 |
| Cebpb     | -0.290 | 1     | 0.438 | 1 | 34 |
| Agpat2    | 1.016  | 0.429 | 0.156 | 1 | 34 |
| Nfkbia    | -1.112 | 1     | 0.406 | 1 | 34 |
| Fst       | -0.444 | 0.048 | 0.156 | 1 | 34 |
| Cd44      | -1.339 | 1     | 0.406 | 1 | 34 |
| Sprr2a3   | -0.889 | 1     | 0.469 | 1 | 34 |
| Serpinb6b | -0.258 | 0.238 | 0.094 | 1 | 34 |
| Krt13     | -0.654 | 0.095 | 0.219 | 1 | 34 |
| Sox4      | -1.567 | 1     | 0.406 | 1 | 34 |
| Hspb8     | 0.630  | 0.19  | 0.062 | 1 | 34 |
| AY036118  | -0.393 | 1     | 0.562 | 1 | 34 |
| Crip2     | -0.365 | 0.952 | 0.406 | 1 | 34 |
| Bambi     | -0.549 | 0.095 | 0.156 | 1 | 34 |
| Msn       | -0.631 | 0.476 | 0.219 | 1 | 34 |
| Gm2a      | 0.637  | 0.429 | 0.031 | 1 | 34 |
| Psca      | -0.585 | 0.81  | 0.406 | 1 | 34 |
| Anxa1     | -1.622 | 1     | 0.625 | 1 | 34 |
| Edem1     | -0.320 | 0.619 | 0.062 | 1 | 34 |
| Hcar2     | -0.339 | 0.095 | 0.188 | 1 | 34 |
| Wnt4      | -0.444 | 0.095 | 0.188 | 1 | 34 |
| Ehd2      | -0.639 | 0.095 | 0.188 | 1 | 34 |
| Id1       | -0.675 | 0.905 | 0.375 | 1 | 34 |
| Tnfaip2   | -0.275 | 0.143 | 0.25  | 1 | 34 |
| Hopx      | -0.583 | 0.143 | 0.25  | 1 | 34 |
| Cyp3a11   | 2.729  | 0.524 | 0     | 1 | 34 |
| Nrn1      | 2.408  | 0.571 | 0     | 1 | 34 |
| Cela1     | 0.549  | 0.429 | 0     | 1 | 34 |
| Foxq1     | -0.364 | 1     | 0.469 | 1 | 34 |
| Calml3    | -0.576 | 0.095 | 0.188 | 1 | 34 |
| Gadd45g   | 0.390  | 0.476 | 0.125 | 1 | 34 |
| Klf4      | -1.123 | 1     | 0.594 | 1 | 34 |
| Clu       | -1.208 | 1     | 0.5   | 1 | 34 |
| Gstm1     | 0.469  | 0.762 | 0.562 | 1 | 34 |
| Hspa1b    | -1.296 | 1     | 0.594 | 1 | 34 |
| Tgfb1     | -0.586 | 0.476 | 0.094 | 1 | 34 |
| Cnn2      | -0.471 | 0.571 | 0.281 | 1 | 34 |
| Ptn       | -0.348 | 0.095 | 0.125 | 1 | 34 |
| Atp5k     | -0.427 | 0.952 | 0.656 | 1 | 34 |
| Hgfac     | 0.399  | 0.381 | 0.031 | 1 | 34 |
| Gsto1     | -0.826 | 1     | 0.5   | 1 | 34 |
| Tmem176b  | -1.407 | 0.905 | 0.562 | 1 | 34 |
| Naaa      | -0.274 | 0.143 | 0.031 | 1 | 34 |
| Gsr       | -0.561 | 0.857 | 0.375 | 1 | 34 |

|           |        |       |       |   |    |
|-----------|--------|-------|-------|---|----|
| Chit1     | -0.373 | 0.143 | 0.156 | 1 | 34 |
| Nme2      | 0.253  | 0.762 | 0.5   | 1 | 34 |
| Crip1     | -0.888 | 1     | 0.469 | 1 | 34 |
| Hbegf     | -1.183 | 0.905 | 0.531 | 1 | 34 |
| Spink5    | -0.446 | 0.095 | 0.156 | 1 | 34 |
| S100a14   | -0.946 | 1     | 0.469 | 1 | 34 |
| mt-Nd3    | -0.911 | 1     | 0.469 | 1 | 34 |
| Ctxn1     | -0.409 | 0.381 | 0.031 | 1 | 34 |
| Gm26532   | -1.442 | 0.857 | 0.469 | 1 | 34 |
| Rtp4      | 0.343  | 0.571 | 0.062 | 1 | 34 |
| Emp1      | -1.251 | 1     | 0.469 | 1 | 34 |
| Rnase4    | 1.872  | 0.524 | 0.062 | 1 | 34 |
| Sfrp1     | -0.835 | 0.429 | 0.219 | 1 | 34 |
| Gm3776    | -0.530 | 0.571 | 0.062 | 1 | 34 |
| Krt17     | -1.279 | 1     | 0.562 | 1 | 34 |
| Ltbp2     | -0.319 | 0.095 | 0.125 | 1 | 34 |
| Il1f9     | -0.371 | 0.095 | 0.125 | 1 | 34 |
| Notch3    | -0.588 | 0.095 | 0.125 | 1 | 34 |
| Krt6b     | -0.912 | 0.095 | 0.125 | 1 | 34 |
| Cxcl5     | -1.787 | 0.095 | 0.125 | 1 | 34 |
| Ier3      | -0.684 | 0.905 | 0.438 | 1 | 34 |
| Tmprss11g | -0.352 | 0.095 | 0.125 | 1 | 34 |
| Rpl9-ps6  | -0.423 | 1     | 0.594 | 1 | 34 |
| Tm4sf1    | -0.848 | 0.143 | 0.156 | 1 | 34 |
| Alox15    | -0.911 | 0.143 | 0.156 | 1 | 34 |
| Id2       | -0.353 | 1     | 0.531 | 1 | 34 |
| Gatm      | -0.533 | 0.143 | 0.062 | 1 | 34 |
| Plet1     | -0.589 | 0.571 | 0.156 | 1 | 34 |
| Hspa1a    | -1.629 | 0.905 | 0.438 | 1 | 34 |
| lfrd1     | -1.200 | 0.952 | 0.5   | 1 | 34 |
| Meg3      | -0.258 | 0.143 | 0.031 | 1 | 34 |
| Oaf       | 0.806  | 0.524 | 0.031 | 1 | 34 |
| Cyr61     | -1.530 | 0.905 | 0.438 | 1 | 34 |
| Wfdc2     | -0.968 | 0.952 | 0.5   | 1 | 34 |
| Acta2     | -0.449 | 0.476 | 0.031 | 1 | 34 |
| Plbd1     | 0.338  | 0.238 | 0.062 | 1 | 34 |
| F3        | -0.862 | 0.286 | 0.219 | 1 | 34 |
| Arg1      | -0.466 | 0.143 | 0.125 | 1 | 34 |
| Gpx2      | -0.713 | 1     | 0.562 | 1 | 34 |
| Tcim      | -1.362 | 0.762 | 0.344 | 1 | 34 |

**Supplemental Figure 1: Cluster identities and cell counts**

**A**

| Cluster    | Identity             | Healthy # | Inflamed # |
|------------|----------------------|-----------|------------|
| Cluster 0  | Chief Cells          | 146       | 1994       |
| Cluster 1  | Neck Cells           | 490       | 1025       |
| Cluster 2  | Chief Cells          | 1211      | 115        |
| Cluster 3  | Neck Cells           | 254       | 875        |
| Cluster 4  | Foveolar Cells       | 24        | 875        |
| Cluster 5  | Foveolar Cells       | 485       | 269        |
| Cluster 6  | Foveolar Cells       | 325       | 358        |
| Cluster 7  | T Cells              | 38        | 645        |
| Cluster 8  | Isthmal Progenitor   | 113       | 527        |
| Cluster 9  | Myeloid/Endothelium  | 416       | 191        |
| Cluster 10 | Foveolar Cells       | 217       | 380        |
| Cluster 11 | Foveolar Cells       | 63        | 500        |
| Cluster 12 | Foveolar Cells       | 118       | 437        |
| Cluster 13 | Parietal Cells       | 300       | 217        |
| Cluster 14 | B Cells              | 17        | 494        |
| Cluster 15 | Parietal Cells       | 176       | 308        |
| Cluster 16 | Chief Cells          | 179       | 75         |
| Cluster 17 | CD4 T Cells          | 0         | 431        |
| Cluster 18 | Neck Cells           | 52        | 377        |
| Cluster 19 | Macrophages          | 75        | 332        |
| Cluster 20 | SPEM Cells           | 96        | 271        |
| Cluster 21 | Fibroblasts          | 232       | 132        |
| Cluster 22 | Chief Cells          | 310       | 17         |
| Cluster 23 | ECL Cells            | 148       | 179        |
| Cluster 24 | Foveolar Cells       | 49        | 194        |
| Cluster 25 | Smooth Muscle        | 154       | 81         |
| Cluster 26 | Neuroendocrine Cells | 83        | 77         |
| Cluster 27 | TFF2+ Cells          | 13        | 146        |
| Cluster 28 | T Cells              | 0         | 111        |
| Cluster 29 | Eosinophils          | 7         | 83         |

**B**

| Cluster        | Cell # |
|----------------|--------|
| Healthy Chief  | 1357   |
| Healthy Neck   | 744    |
| Inflamed Chief | 1900   |
| Inflamed Neck  | 2109   |
| SPEM           | 271    |

**C**

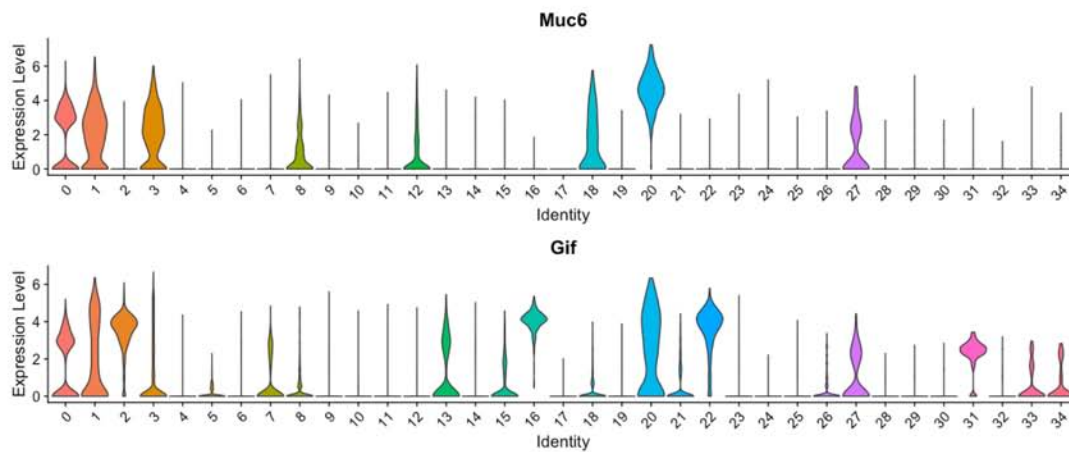

Supplemental Figure 2: GKN3 staining in normal human corpus and antrum

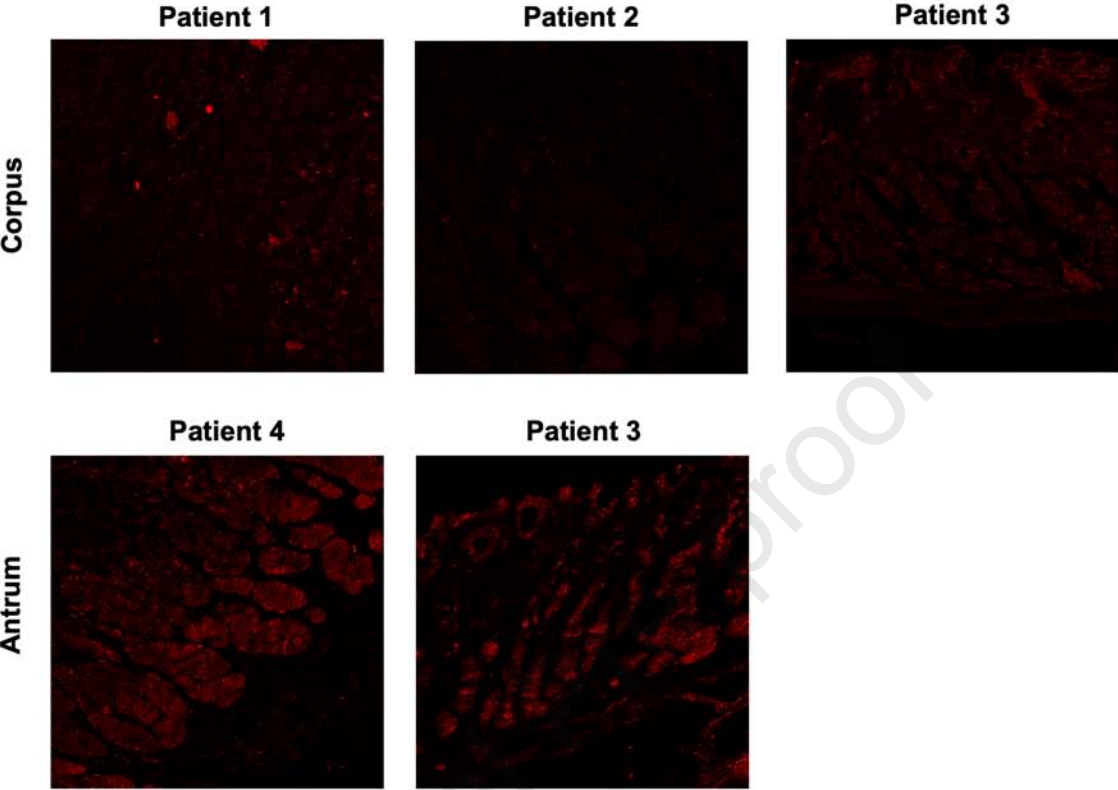



## Supplementary Methods.

### Data Processing & Statistical Analysis

All libraries and subsets were processed to ensure quality. Genes relating to mitochondria localized proteins are markers for broken or low-quality cells.<sup>1</sup> Consequently, low quality cells expressing high levels of mitochondrial markers above a majority threshold unique to each library/subset were filtered out before downstream analysis. Prior to clustering each library was globally scaled and normalized by a factor of  $10^4$  and log transformation. Additionally, unwanted sources of variation attributed to biological noise and batch effects were identified and regressed out to improve downstream analysis and dimensionality reduction.<sup>2</sup> Clustering methods such as PCA can use variable features as input and identifying these variable features is often a necessary step prior to clustering. Variable features and outliers were identified with variance stabilising transformation (VST).<sup>3</sup> VST first fits a line to the relationship of  $\log(\text{variance})$  and  $\log(\text{mean})$  using localised polynomial regression, then the features are standardised using the observed mean and expected variance given by the fitted line. The variance was then calculated from these standardised values and the top 2,000 most varied features were selected to inform clustering. After variable features were identified, the gene expression profiles per cell were scaled such that the mean expression of each gene across cells is zero and the variance across cells is 1. This transformation gives equal weight to each cell during downstream analysis so that highly expressed genes do not become overrepresented. These transformations also have the benefit of improving clustering resolution after dimensionality reduction.

Cell set dimensionalities were reduced jointly using diagonalized canonical correlation analysis (CCA), followed by L-2 normalization. Low dimensional representations of cell populations were then queried for cells representing mutual nearest neighbours (MNN).<sup>4</sup> Cells identified between

populations as MNNs that represent shared relationships were used as “anchors” to integrate data sets and were scored based on pairwise comparison of mutual neighbourhoods.<sup>5</sup> The merged data set was then linearly scaled and centred. Components for clustering and dimensionality reduction were identified through principle component analysis, where principle components that contributed the most information gain were used to inform uniform non-linear dimensionality reduction and visualisation with manifold approximation and projection (UMAP)<sup>6</sup>. Clustering was performed by k-nearest neighbours (KNN), and the resulting KNN graph was used to construct a shared nearest neighbour (SNN) graph based on the overlap of mutual neighbourhoods (Jaccard index) between every cell and its nearest neighbours. Clusters were identified from the SNN graph through modularity function optimization in accordance with algorithms described by Waltman and van Eck.<sup>7, 8</sup> These data were projected into a two-dimensional plane with UMAP for cluster visualization.

Genes that were used to define the cells populating clusters of integrated libraries were identified through receiver operator curve (ROC) analysis generated from individual classifiers trained on each gene in a global comparison for each identity class. Defining genes for each cluster were selected based on the area under the curve for their respective classifiers, where a value of 0.5 indicates the gene has no predictive power in determining the identity class and a value of 1 indicates the gene can perfectly distinguish the identity class and can be used to determine the cell type for that cluster. Globally distinguished genes for each cluster and comparison identity class were identified by calculating the normalized gene expression for the average single cell. Differentially expressed genes with at least a 2-fold change, and P value less than 0.01 were identified via the Wilcoxon rank sum test with Bonferroni correction for multiple comparisons. Compared to other differential expression methods in single cell, such as EdgeR and Monocle, the Wilcoxon rank sum test produces less false positives, while maintaining a higher sensitivity compared to DESeq2<sup>9</sup>.

Single cell trajectory analysis in pseudotime was conducted with Monocle 2.12.0. The dimensions of cells were reduced and clustered using the dimensionality reduction tree method (DDRTree).<sup>8</sup> Cells were ordered on a sequential plane by the progression of genes that were differentially expressed between DDRTree clusters based on a minimum spanning tree that was calculated from a weighted undirected graph modified to allow multiple cell fates.<sup>10, 11</sup> Gene expression profiles unique to cell fate were identified through branched expression analysis modelling (BEAM).

## REFERENCES

1. Illicic T, Kim JK, Kolodziejczyk AA, et al. Classification of low quality cells from single-cell RNA-seq data. *Genome Biol* 2016;17:29.
2. Buettner F, Natarajan KN, Casale FP, et al. Computational analysis of cell-to-cell heterogeneity in single-cell RNA-sequencing data reveals hidden subpopulations of cells. *Nat Biotechnol* 2015;33:155-60.
3. Lin SM, Du P, Huber W, et al. Model-based variance-stabilizing transformation for Illumina microarray data. *Nucleic acids research* 2008;36:e11-e11.
4. Haghverdi L, Lun ATL, Morgan MD, et al. Batch effects in single-cell RNA-sequencing data are corrected by matching mutual nearest neighbors. *Nat Biotechnol* 2018;36:421-427.
5. Stuart T, Butler A, Hoffman P, et al. Comprehensive Integration of Single-Cell Data. *Cell* 2019;177:1888-1902 e21.
6. Becht E, McInnes L, Healy J, et al. Dimensionality reduction for visualizing single-cell data using UMAP. *Nat Biotechnol* 2018.
7. Waltman L, van Eck NJ. A smart local moving algorithm for large-scale modularity-based community detection. *European Physical Journal B* 2013;86.
8. Qiu X, Mao Q, Tang Y, et al. Reversed graph embedding resolves complex single-cell trajectories. *Nat Methods* 2017;14:979-982.
9. Mou T, Deng W, Gu F, et al. Reproducibility of Methods to Detect Differentially Expressed Genes from Single-Cell RNA Sequencing. *Frontiers in Genetics* 2020;10:1331.
10. Trapnell C, Cacchiarelli D, Grimsby J, et al. The dynamics and regulators of cell fate decisions are revealed by pseudotemporal ordering of single cells. *Nat Biotechnol* 2014;32:381-386.
11. Magwene PM, Lizardi P, Kim J. Reconstructing the temporal ordering of biological samples using microarray data. *Bioinformatics* 2003;19:842-50.

**What you need to know:**

**Background and Context:** Chronic atrophic gastritis can lead to gastric metaplasia and increase risk of gastric adenocarcinoma. Metaplasia is a pre-requisite for carcinogenesis, but the mechanism(s) by which inflammation induces metaplasia are poorly understood.

**New Findings:** In analyses of tissues from chronically inflamed stomachs of mice and humans, we expanded the definition of gastric metaplasia to include *Gkn3* expressing cells in the corpus. During chronic inflammation, chief cells and mucous neck cells are plastic and enact a pre-metaplastic transcriptional phenotype that progresses to metaplasia.

**Limitations:** This study was performed in mice and human tissue samples; further studies are needed to determine the mechanisms of this process in humans.

**Impact:** These findings expand the definition of spasmolytic polypeptide expressing metaplasia and indicate mucous neck cell and chief cell plasticity during chronic inflammation.

**Lay Summary:** This study identified cells and proteins that contribute to development of cancer in the inflamed stomach.
